# Supplementary material for: Denoising Autoencoder Normalization for Large-Scale Untargeted Metabolomics by Gas Chromatography–Mass Spectrometry
Source: Metabolites. 2023 Aug 13;13(8):944. doi: 10.3390/metabo13080944 (PMC10456436; doi:10.3390/metabo13080944)
Supplement: Supplementary file 1 [file metabolites-13-00944-s001.zip › Supplementary Data File_Zhang_Fan et al_08-2023.xlsx]

## Sheet: T2D cohort data
								batch	Batch01	Batch01	Batch01	Batch01	Batch01	Batch01	Batch01	Batch01	Batch01	Batch01	Batch01	Batch01	Batch01	Batch01	Batch01	Batch01	Batch01	Batch01	Batch01	Batch01	Batch01	Batch01	Batch01	Batch01	Batch01	Batch01	Batch01	Batch01	Batch01	Batch01	Batch01	Batch01	Batch01	Batch01	Batch01	Batch01	Batch01	Batch01	Batch01	Batch01	Batch01
	Type 2 diabetes cohort data							Species	Human	Human	Human	Human	Human	Human	Human	Human	Human	Human	Human	Human	Human	Human	Human	Human	Human	Human	Human	Human	Human	Human	Human	Human	Human	Human	Human	Human	Human	Human	Human	Human	Human	Human	Human	Human	Human	Human	Human	Human	Human
	raw data, processed data output from GC-BinBase							Organ	Plasma	Plasma	Plasma	Plasma	Plasma	Plasma	Plasma	Plasma	Plasma	Plasma	Plasma	Plasma	Plasma	Plasma	Plasma	Plasma	Plasma	Plasma	Plasma	Plasma	Plasma	Plasma	Plasma	Plasma	Plasma	Plasma	Plasma	Plasma	Plasma	Plasma	Plasma	Plasma	Plasma	Plasma	Plasma	Plasma	Plasma	Plasma	Plasma	Plasma	Plasma
	not normalized, i.e. input into data normalization workflows							sampleType	pool qc	BioIVT validation qc_1	BioIVT validation qc_3	sample	sample	sample	sample	sample	sample	sample	sample	sample	sample	pool qc	BioIVT validation qc_1	sample	sample	sample	sample	sample	sample	sample	sample	sample	sample	pool qc	BioIVT validation qc_1	sample	sample	sample	sample	sample	sample	sample	sample	sample	sample	pool qc	BioIVT validation qc_1	sample	sample
								injection order	_0001	_0002	_0003	_0004	_0005	_0006	_0007	_0008	_0009	_0010	_0011	_0012	_0013	_0014	_0015	_0016	_0017	_0018	_0019	_0020	_0021	_0022	_0023	_0024	_0025	_0026	_0027	_0028	_0029	_0030	_0031	_0032	_0033	_0034	_0035	_0036	_0037	_0038	_0039	_0040	_0041
								file name	181109dYZsa25_1	181109dYZsa26_1	181109dYZsa27_1	181109dYZsa28_1	181109dYZsa29_1	181109dYZsa30_1	181109dYZsa31_1	181109dYZsa32_1	181109dYZsa33_1	181109dYZsa34_1	181109dYZsa35_1	181109dYZsa36_1	181109dYZsa37_1	181109dYZsa39_1	181109dYZsa40_1	181109dYZsa41_1	181109dYZsa42_1	181109dYZsa43_1	181109dYZsa44_1	181109dYZsa45_1	181109dYZsa46_1	181109dYZsa47_1	181109dYZsa48_1	181109dYZsa49_1	181109dYZsa50_1	181110dYZsa03_1	181110dYZsa04_1	181110dYZsa05_1	181110dYZsa06_1	181110dYZsa07_1	181110dYZsa08_1	181110dYZsa09_1	181110dYZsa10_1	181110dYZsa11_1	181110dYZsa12_1	181110dYZsa13_1	181110dYZsa14_1	181110dYZsa16_1	181110dYZsa17_1	181110dYZsa18_1	181110dYZsa19_1
								acquisition date	2018-11-10	2018-11-10	2018-11-10	2018-11-10	2018-11-10	2018-11-10	2018-11-10	2018-11-10	2018-11-10	2018-11-10	2018-11-10	2018-11-10	2018-11-10	2018-11-10	2018-11-10	2018-11-10	2018-11-10	2018-11-10	2018-11-10	2018-11-10	2018-11-10	2018-11-10	2018-11-10	2018-11-10	2018-11-10	2018-11-10	2018-11-10	2018-11-10	2018-11-10	2018-11-10	2018-11-10	2018-11-10	2018-11-10	2018-11-10	2018-11-10	2018-11-10	2018-11-10	2018-11-10	2018-11-10	2018-11-11	2018-11-11
								acquisition time	07:18:05	07:42:07	08:06:01	08:30:02	08:54:00	09:18:01	09:42:01	10:06:02	10:30:01	10:54:02	11:18:50	11:42:02	12:06:00	12:53:57	13:17:59	13:41:57	14:06:01	14:29:57	14:54:01	15:17:57	15:41:59	16:05:59	16:30:00	16:54:01	17:18:01	18:06:02	18:30:03	18:54:06	19:18:07	19:42:07	20:06:07	20:30:07	20:54:11	21:18:09	21:42:10	22:06:11	22:30:11	23:18:15	23:42:16	00:06:14	00:30:12
No	compound name	compound type	InChI key	PubChem id	ret.index	quant mz	BB id	mass spectrum
1	z C30 FAME internal standard	internal standard (FAME)			1113100	87	14441	82:386.0 83:175.0 84:640.0 85:1316.0 86:22.0 87:14820.0 88:833.0 89:76.0 94:54.0 95:201.0 96:151.0 97:1721.0 98:742.0 99:328.0 100:80.0 101:1398.0 102:69.0 104:59.0 107:129.0 109:95.0 111:559.0 112:151.0 113:46.0 115:604.0 116:167.0 118:19.0 122:20.0 123:188.0 124:65.0 125:151.0 126:29.0 127:20.0 128:44.0 130:273.0 135:181.0 136:74.0 137:119.0 138:92.0 141:189.0 143:2506.0 147:213.0 149:133.0 150…	80982	105077	103133	65797	83541	66161	92906	85583	83705	75422	97612	80781	77897	100942	102432	85590	83813	90690	85803	79586	69629	83334	67395	79204	66405	75346	80461	64620	80908	94493	62225	87777	82818	84665	69256	60667	79185	88774	96232	82348	89004
2	z C28 FAME internal standard	internal standard (FAME)			1061700	87	14378	82:1635.0 83:9279.0 84:3127.0 85:4574.0 86:445.0 87:52826.0 88:4394.0 89:458.0 90:166.0 91:371.0 92:221.0 93:884.0 94:402.0 95:2688.0 96:1202.0 97:6393.0 98:2813.0 99:993.0 100:308.0 101:4737.0 102:644.0 103:185.0 104:196.0 105:244.0 106:135.0 107:756.0 108:249.0 109:1266.0 110:479.0 111:2453.0 112:669.0 113:509.0 114:166.0 115:1549.0 116:878.0 117:263.0 118:91.0 119:193.0 120:130.0 121:737.0 122…	116516	146405	144702	94734	116741	99694	123251	116396	113476	106427	136615	112773	113153	141108	136721	120807	115695	125155	122920	120634	108368	129862	110022	126292	107130	120078	126146	104226	128888	142964	107566	134457	130367	135158	110410	105034	128100	137779	145280	127372	140962
3	z C26 FAME internal standard	internal standard (FAME)			1006900	87	14367	82:1915.0 83:11877.0 84:3974.0 85:5299.0 86:566.0 87:71923.0 88:6118.0 89:777.0 90:208.0 91:390.0 92:183.0 93:1025.0 94:393.0 95:2968.0 96:1369.0 97:7988.0 98:3576.0 99:1173.0 100:384.0 101:6523.0 102:814.0 103:275.0 104:67.0 105:188.0 106:107.0 107:760.0 108:225.0 109:1382.0 110:544.0 111:2977.0 112:693.0 113:570.0 114:190.0 115:2039.0 116:1089.0 117:276.0 118:52.0 119:141.0 120:67.0 121:864.0 1…	150683	188977	180403	126076	146739	133866	154467	148423	138721	135903	173512	141892	149540	179491	171323	161134	143013	157665	158184	163629	145173	173380	151235	169446	149420	162467	174682	146105	176989	187946	147802	181723	178026	181977	156886	152985	177931	184822	191406	174217	192580
4	z C24 FAME internal standard	internal standard (FAME)			948820	87	14373	82:1153.0 83:8590.0 84:3071.0 85:3471.0 86:396.0 87:59844.0 88:5161.0 89:641.0 90:144.0 94:31.0 95:1422.0 96:830.0 97:5744.0 98:2544.0 99:783.0 100:334.0 101:4696.0 102:589.0 107:174.0 109:800.0 110:323.0 111:2176.0 112:466.0 113:369.0 114:184.0 115:1576.0 116:697.0 121:268.0 123:395.0 124:149.0 125:962.0 126:180.0 127:185.0 128:94.0 129:1766.0 130:908.0 133:104.0 135:239.0 136:22.0 137:212.0 138…	207361	249340	247972	175848	214796	190657	204279	203397	187013	189683	237818	196449	212871	233902	233049	228720	195651	205575	225274	239360	197815	233486	224995	243359	213566	233866	237443	209778	240094	255800	217185	255941	245932	255773	225953	221838	244295	257136	264073	243734	264273
5	z C22 FAME internal standard	internal standard (FAME)			886620	87	14350	82:3004.0 83:21231.0 84:7857.0 85:8524.0 86:1136.0 87:166117.0 88:15670.0 89:1631.0 90:255.0 91:185.0 92:253.0 93:1704.0 94:690.0 95:5682.0 96:2240.0 97:17196.0 98:6247.0 99:1862.0 100:603.0 101:15683.0 102:1823.0 103:582.0 104:28.0 105:240.0 107:1288.0 108:115.0 109:2286.0 110:858.0 111:5184.0 112:1387.0 113:1036.0 114:338.0 115:4373.0 116:2108.0 117:334.0 118:87.0 120:97.0 121:1400.0 122:444.0 …	246205	289773	269671	212829	242174	231897	240946	234803	216712	231631	273362	230421	247226	269482	275304	277201	221047	241307	262777	284150	228436	275344	272754	280328	259186	280087	273649	249045	275852	299802	254026	294765	285168	283236	267246	263085	272286	293128	300299	280085	307453
6	z C20 FAME internal standard	internal standard (FAME)			819620	87	14338	82:5074.0 83:32673.0 84:13151.0 85:11426.0 86:1478.0 87:319100.0 88:24805.0 89:2994.0 90:793.0 91:2054.0 92:696.0 93:3531.0 94:1307.0 95:8269.0 96:3740.0 97:23136.0 98:10533.0 99:2945.0 100:1329.0 101:24132.0 102:3016.0 103:840.0 104:332.0 105:729.0 106:281.0 107:2176.0 108:615.0 109:3504.0 110:1486.0 111:7673.0 112:2075.0 113:1494.0 114:602.0 115:7860.0 116:3323.0 117:697.0 118:158.0 119:419.0 1…	290956	324283	299251	234316	277646	278455	278141	258022	237098	256665	291782	261121	280062	312485	304041	314954	252714	270375	312788	319885	247802	300800	310167	319931	291472	314440	300576	280320	297675	337697	280711	330728	310534	313498	297400	290455	298787	322544	329357	309121	330411
7	z C18 FAME internal standard	internal standard (FAME)			747420	87	14344	82:1871.0 83:20933.0 84:9746.0 85:6550.0 86:978.0 87:204914.0 88:17820.0 89:2588.0 90:624.0 91:328.0 92:267.0 93:1563.0 94:298.0 95:3334.0 96:1383.0 97:15003.0 98:6800.0 99:1751.0 100:895.0 101:17632.0 102:1953.0 103:2705.0 104:356.0 105:381.0 106:55.0 107:1016.0 108:138.0 109:1363.0 110:506.0 111:4334.0 112:1204.0 113:879.0 114:963.0 115:4477.0 116:1971.0 117:1287.0 118:152.0 119:139.0 120:2.0 1…	330216	372059	338511	269227	305934	313842	322279	287620	271212	290057	337805	292822	323875	356548	347404	356987	283550	310783	360342	366842	267989	329225	341738	355377	333684	353049	341258	306865	329757	377532	312984	363540	345540	336554	337885	323942	333147	360448	379454	341517	363939
8	z C16 FAME internal standard	internal standard (FAME)			668720	87	14328	82:7874.0 83:52241.0 84:24201.0 85:15726.0 86:2428.0 87:598692.0 88:50073.0 89:5783.0 90:1690.0 91:2384.0 92:1041.0 93:5596.0 94:2004.0 95:12075.0 96:5526.0 97:35942.0 98:18845.0 99:4181.0 100:2473.0 101:45027.0 102:5856.0 103:1639.0 104:500.0 105:737.0 106:300.0 107:3048.0 108:712.0 109:4582.0 110:1980.0 111:10364.0 112:3206.0 113:2024.0 114:840.0 115:17535.0 116:5756.0 117:605.0 118:178.0 119:3…	913929	1005153	974883	760552	867109	896856	885589	824163	755711	854628	965264	842744	934408	1003227	965020	1062059	773383	880332	1039202	1041949	762470	926547	1016734	995200	949299	989806	924055	898234	913418	1082163	846059	1043528	987703	949097	950601	913495	936222	981053	1059893	966481	1009597
9	z C14 FAME internal standard	internal standard (FAME)			582620	87	14330	82:6846.0 83:45734.0 84:24541.0 85:13337.0 86:2591.0 87:571091.0 88:50094.0 89:10256.0 90:1954.0 91:2301.0 92:965.0 93:4658.0 94:1828.0 95:9776.0 96:4566.0 97:29791.0 98:17396.0 99:3982.0 100:2427.0 101:47790.0 102:5412.0 103:40347.0 104:4285.0 105:2466.0 106:413.0 107:2369.0 108:640.0 109:3742.0 110:1575.0 111:9047.0 112:3062.0 113:2475.0 114:1382.0 115:12398.0 116:4894.0 117:24303.0 118:2568.0 …	824963	857387	800358	700145	724886	764489	715666	761308	685509	751975	799716	761101	751767	857090	774746	865862	682232	738590	844405	826241	686547	791528	811597	848241	753416	807958	760410	729041	751074	848707	745396	846178	804811	804717	800767	759664	797327	823840	852944	793217	857470
10	z C12 FAME internal standard	internal standard (FAME)			487220	87	15538	87:89125.0 143:9407.0 88:8052.0 83:7697.0 101:7376.0 129:5886.0 171:5376.0 84:4764.0 97:4682.0 115:4499.0 98:3273.0 183:2617.0 85:2330.0 157:1877.0 95:1741.0 185:1713.0 111:1269.0 82:1258.0 214:1176.0 144:979.0 102:970.0 89:944.0 116:886.0 96:874.0 109:745.0 93:703.0 172:693.0 130:681.0 99:640.0 112:536.0 100:512.0 86:415.0 184:391.0 91:388.0 125:367.0 110:356.0 94:315.0 107:313.0 90:276.0 186:27…	1114941	1178999	1082537	948725	981310	1050638	993291	1038464	943233	1048906	1094965	1050133	1044231	1152071	1062240	1185840	955092	1015250	1164449	1141467	954185	1083443	1155711	1182144	1042009	1109878	1073116	1020495	1055272	1187697	1050682	1196955	1134677	1140232	1125761	1066556	1113030	1144109	1188571	1116274	1196415
11	z C10 FAME internal standard	internal standard (FAME)			381020	87	14348	82:2900.0 83:13221.0 84:11208.0 85:5544.0 86:1495.0 87:180565.0 88:18205.0 89:2762.0 90:1063.0 91:966.0 92:587.0 93:1236.0 94:797.0 95:3016.0 96:1006.0 97:7113.0 98:6065.0 99:11.0 100:928.0 101:19422.0 102:1942.0 103:785.0 104:297.0 105:371.0 106:124.0 107:437.0 108:202.0 109:283.0 110:776.0 111:1516.0 112:1420.0 113:435.0 114:211.0 115:4005.0 116:984.0 117:258.0 118:110.0 119:95.0 120:66.0 121:1…	1264130	1432603	1259393	1097785	1171735	1233425	1124994	1218447	1082189	1207870	1276197	1202430	1177753	1337554	1215748	1383547	1089412	1198998	1374008	1320587	1118014	1276193	1329787	1378594	1162297	1265286	1262186	1190282	1227057	1397874	1221836	1399378	1329765	1319913	1307359	1238515	1308874	1350320	1393281	1308184	1400673
12	z C09 FAME internal standard	internal standard (FAME)			323120	87	14356	82:1461.0 83:7626.0 84:7545.0 85:1926.0 86:1261.0 87:106113.0 88:10710.0 89:1806.0 90:697.0 91:535.0 92:383.0 93:700.0 94:717.0 95:779.0 96:1040.0 97:3995.0 98:2776.0 99:661.0 100:819.0 101:11017.0 102:1237.0 103:406.0 104:179.0 105:235.0 106:88.0 107:147.0 108:76.0 109:134.0 110:142.0 111:750.0 112:991.0 113:256.0 114:135.0 115:3158.0 116:478.0 117:553.0 118:76.0 119:67.0 120:35.0 121:138.0 122:…	1154253	1283102	1147425	1044670	1077063	1122601	1055843	1124369	1006724	1085756	1136941	1101058	1104155	1185962	1098041	1290629	1022993	1072636	1254213	1180335	1065628	1178396	1235593	1277893	1132889	1152757	1147175	1090028	1128883	1254985	1130413	1256599	1224368	1246816	1194861	1119941	1212525	1222519	1270943	1156325	1274580
13	z C08 FAME internal standard	internal standard (FAME)			262320	87	14391	82:816.0 83:2626.0 84:2773.0 85:683.0 86:214.0 87:34868.0 88:3753.0 89:449.0 90:161.0 91:171.0 92:146.0 93:197.0 94:139.0 95:251.0 96:181.0 97:1186.0 98:1204.0 99:241.0 100:174.0 101:4901.0 102:501.0 103:53.0 105:26.0 106:23.0 107:114.0 108:99.0 109:283.0 110:52.0 111:102.0 112:76.0 113:66.0 114:58.0 115:4854.0 116:422.0 117:16.0 118:28.0 119:33.0 120:46.0 121:27.0 122:32.0 123:32.0 124:60.0 125:…	917221	1030305	926511	894339	914133	952839	866258	924535	853945	914867	946134	939490	943936	988197	917579	1085999	893868	906830	1063753	1033285	908438	983800	1023216	1066203	997448	975470	962742	972029	943515	1075433	993646	1089757	1038585	1066614	1051341	952514	1044973	1014483	1056954	994393	1032738
16	valine-d8_minor	internal standard (isotope labeled)			236064	164	233111	85:150.0 87:730.0 88:3809.0 89:1281.0 90:495.0 91:483.0 92:582.0 93:66.0 94:63.0 95:39.0 101:162.0 103:6669.0 104:925.0 105:304.0 111:36.0 112:18.0 114:40.0 117:150.0 118:264.0 119:441.0 120:477.0 121:90.0 122:88.0 123:39.0 125:85.0 127:44.0 130:36.0 131:3855.0 132:1069.0 133:193.0 135:1033.0 136:1994.0 137:276.0 138:83.0 140:27.0 147:3513.0 148:416.0 149:126.0 150:47.0 151:58.0 152:18.0 153:21.0…	8819	10916	18204	26267	31053	31845	27582	29746	27036	25016	34821	29568	29129	28187	21624	36856	27442	31160	27374	32231	29785	11436	30036	32302	28026	9491	18121	28991	7228	36744	23414	33663	29956	31065	22344	38484	28019	22378	23437	31060	36009
17	valine-d8	internal standard (isotope labeled)			310054	152	233079	85:763.0 86:1604.0 87:3609.0 88:3611.0 90:1305.0 91:668.0 92:340.0 93:83.0 97:156.0 100:2441.0 101:21806.0 102:5837.0 103:9155.0 104:2286.0 105:1266.0 106:1028.0 107:401.0 108:119.0 109:108.0 112:155.0 113:355.0 115:1029.0 116:940.0 117:3507.0 118:2528.0 119:5387.0 120:1470.0 121:501.0 122:402.0 123:79.0 124:31.0 125:45.0 128:38.0 129:248.0 130:582.0 131:7411.0 132:7899.0 133:6492.0 134:4914.0 13…	1172798	1005038	342639	538303	562540	554057	598427	568493	576924	575299	648230	598698	581087	524160	389058	666385	605606	628874	645362	681403	544318	1179180	594010	659363	588667	1012894	383626	614450	1309858	680833	649143	699250	606816	620388	599605	665740	615904	464421	444595	627257	707090
25	tyrosine-d7	internal standard (isotope labeled)			669412	219	233081	85:862.0 86:973.0 89:479.0 90:214.0 92:377.0 93:577.0 94:2235.0 95:1334.0 96:2629.0 97:3108.0 98:1273.0 99:686.0 100:4746.0 101:50784.0 102:8013.0 103:4982.0 104:1528.0 105:655.0 106:402.0 108:810.0 109:674.0 110:1281.0 111:1382.0 112:452.0 113:950.0 114:342.0 115:910.0 116:1030.0 117:2268.0 118:976.0 119:810.0 120:760.0 121:393.0 122:552.0 123:1040.0 124:900.0 125:1582.0 126:511.0 127:570.0 128:…	441278	439836	331144	329118	435413	420975	516459	407999	347406	409134	505133	429350	451045	426011	309041	529651	365351	460635	533897	534026	368373	454539	496625	497482	535094	424229	333658	458922	477526	562088	430197	571640	479122	460853	455371	656209	474190	330327	344011	513703	519267
28	tryptophan-d8	internal standard (isotope labeled)			778570	209	233084	85:2068.0 86:1113.0 87:1761.0 88:640.0 89:1491.0 90:260.0 92:631.0 93:2651.0 95:6530.0 96:10187.0 97:6699.0 98:6843.0 99:1675.0 100:997.0 101:8293.0 102:3596.0 103:1817.0 104:605.0 105:1760.0 106:749.0 107:1649.0 108:2670.0 109:3915.0 110:3529.0 111:2326.0 112:1216.0 113:440.0 114:164.0 115:844.0 116:3255.0 117:33292.0 118:3564.0 119:2598.0 120:800.0 121:1811.0 122:969.0 123:2658.0 124:1510.0 125…	290087	264877	205174	234724	297415	283215	338116	263496	240262	267695	314001	257206	288835	286651	210383	321612	243776	295107	315940	321502	240939	289980	307046	316302	300728	268135	212028	272142	285242	352213	266721	327364	292769	293183	276301	372438	280791	215650	213259	318206	334317
32	threonine-d5_minor	internal standard (isotope labeled)			358287	220	233087	85:113.0 86:418.0 87:806.0 88:3224.0 89:2503.0 90:970.0 91:685.0 92:247.0 93:59.0 94:31.0 95:61.0 99:118.0 100:336.0 101:695.0 102:2778.0 103:2224.0 104:1419.0 105:1056.0 106:666.0 107:346.0 108:207.0 109:45.0 113:121.0 115:364.0 116:490.0 118:1230.0 119:2700.0 120:755.0 121:32121.0 122:3427.0 123:1196.0 124:82.0 125:27.0 129:136.0 131:804.0 132:2017.0 133:4320.0 134:7476.0 135:23661.0 136:3300.0…	17877	22088	42863	46101	57849	55569	51213	55775	49028	56993	61397	58078	55299	52489	42559	70718	51736	61163	64631	64335	56249	24399	61837	65163	55097	17311	37687	55641	23423	67003	55828	68034	60593	59198	57614	72478	62774	38528	43779	57173	70558
33	threonine-d5	internal standard (isotope labeled)			407428	223	233094	85:351.0 87:1989.0 88:737.0 89:1774.0 90:470.0 91:424.0 92:109.0 93:96.0 94:61.0 95:58.0 96:48.0 97:144.0 98:269.0 99:324.0 101:5690.0 102:12911.0 103:3734.0 104:1701.0 105:525.0 106:255.0 107:243.0 108:112.0 109:48.0 113:226.0 115:623.0 116:435.0 118:1114.0 119:2025.0 120:665.0 121:15379.0 122:1661.0 123:580.0 124:78.0 125:57.0 126:130.0 127:116.0 130:4883.0 131:3499.0 132:5645.0 133:5782.0 134:…	92813	94778	23203	27737	31869	31204	33855	33882	30981	36581	42019	34863	31711	32560	21132	33398	30892	36238	42978	48991	32225	96485	37232	40590	36456	71668	26008	37744	104367	37789	39739	42980	33167	34751	37709	45735	32412	22912	29793	38773	47890
38	tagatose 1	internal standard (isotope labeled)			629499	307	124110	85:133.0 86:55.0 87:181.0 88:142.0 89:1043.0 90:163.0 91:49.0 93:67.0 94:44.0 95:37.0 97:94.0 99:85.0 100:189.0 101:225.0 102:181.0 103:8537.0 104:667.0 105:333.0 110:48.0 111:51.0 113:101.0 114:171.0 115:84.0 116:83.0 117:859.0 118:198.0 119:156.0 121:53.0 122:25.0 124:29.0 125:33.0 126:180.0 127:241.0 128:109.0 129:613.0 130:159.0 131:239.0 133:1163.0 134:285.0 135:74.0 138:28.0 139:22.0 142:70…	520	5440	2785	591	1693	1103	1472	2879	1474	2148	2745	1546	1086	567	4744	1152	1159	1831	2173	3250	1584	2184	1742	1769	1056	678	4588	1352	1696	2243	3683	3484	2026	1088	2028	1738	1573	500	5189	2260	2803
42	sorbitol-d8	internal standard (isotope labeled)			664972	323	365141	87:6038.0 90:5038.0 91:790.0 92:20338.0 93:931.0 94:744.0 102:5021.0 104:13006.0 105:176289.0 106:17224.0 107:6440.0 120:85933.0 121:9445.0 122:3359.0 131:18253.0 132:15616.0 133:64991.0 134:18704.0 135:5849.0 136:1946.0 145:5420.0 146:1983.0 147:229682.0 148:42416.0 149:22156.0 150:6060.0 151:1524.0 152:362.0 160:1745.0 161:50808.0 162:6914.0 164:1378.0 165:2416.0 172:696.0 173:1685.0 178:3456.0…	285985	298868	272167	186852	256662	235623	280592	242603	201142	239521	277694	220307	246582	294123	300562	306552	207988	264794	284499	312861	213531	255434	291487	260736	269376	284914	287586	238673	266484	313273	255060	313119	277142	256800	275260	376094	273941	261337	315086	289233	303316
44	serine-d3_minor	internal standard (isotope labeled)			337492	119	233085	85:112.0 86:291.0 87:2689.0 88:3468.0 89:2258.0 90:1431.0 91:4919.0 92:2313.0 93:504.0 94:164.0 97:725.0 101:1298.0 102:3830.0 103:5088.0 104:2700.0 105:11865.0 106:1477.0 107:534.0 108:51.0 112:73.0 113:52.0 115:962.0 117:1115.0 118:7632.0 119:85364.0 120:10301.0 121:3487.0 122:294.0 125:69.0 128:49.0 129:114.0 130:516.0 131:9467.0 132:3187.0 133:4312.0 134:1680.0 135:50254.0 136:5879.0 137:1985…	98165	132007	197929	207086	255457	255763	231456	263383	225415	246377	299241	252012	232252	222673	186345	293547	237927	297913	315972	262998	242299	124622	260589	283683	257334	93327	185247	245107	115543	277750	237203	272121	244535	250298	248883	296091	260342	168677	186764	258864	290916
45	serine_d3	internal standard (isotope labeled)			393782	207	233090	85:146.0 86:376.0 87:1680.0 88:730.0 89:690.0 90:347.0 91:1125.0 92:765.0 96:61.0 100:1586.0 101:13063.0 102:4451.0 103:5671.0 104:1294.0 105:1896.0 106:311.0 115:565.0 116:293.0 117:3083.0 118:1125.0 119:6416.0 120:2290.0 121:194.0 122:31.0 129:185.0 130:450.0 131:3350.0 132:2897.0 133:4603.0 134:2676.0 135:1195.0 136:317.0 138:23.0 145:155.0 146:573.0 147:13241.0 148:3377.0 149:1585.0 150:377.0…	215654	213150	65929	62366	74740	77181	70807	78881	72567	90518	101557	83744	73916	87696	56064	102216	67893	83133	100955	121542	70510	221765	97431	111427	81755	164122	63585	81581	235081	117466	87781	126377	93808	94770	95022	107939	92527	66063	76992	93414	124235
56	proline-d7	internal standard (isotope labeled)			361778	149	233092	85:230.0 86:276.0 87:611.0 88:355.0 89:153.0 90:43.0 91:143.0 92:31.0 97:58.0 98:51.0 99:128.0 102:452.0 103:483.0 104:699.0 105:474.0 106:273.0 107:147.0 108:53.0 109:53.0 111:52.0 115:167.0 116:186.0 118:396.0 119:328.0 120:83.0 122:56.0 123:91.0 128:33.0 129:115.0 131:498.0 132:197.0 133:746.0 134:368.0 137:40.0 140:186.0 145:191.0 146:135.0 147:4333.0 148:3550.0 149:27353.0 150:3599.0 151:102…	394600	442343	207648	166407	195055	190977	176659	220935	175691	213976	254462	211313	219622	181842	138476	219852	164392	216716	270210	271860	180510	444654	211458	253013	208449	243220	129079	203793	385031	235037	213197	216900	195533	204791	183154	189368	210902	92996	132708	225398	198108
63	phenylalanine-d8_minor	internal standard (isotope labeled)			501138	128	233088	87:880.0 88:940.0 89:139.0 90:105.0 91:401.0 92:667.0 93:120.0 94:434.0 95:49.0 96:727.0 97:1426.0 98:5107.0 99:893.0 100:528.0 101:223.0 103:1055.0 104:129.0 107:49.0 108:1503.0 109:1423.0 110:586.0 111:57.0 112:60.0 117:637.0 118:15.0 119:297.0 121:102.0 122:41.0 123:90.0 124:459.0 125:339.0 126:485.0 128:26286.0 129:2461.0 131:6214.0 132:1199.0 133:393.0 134:50.0 137:123.0 138:260.0 145:14.0 1…	38727	41100	57117	67484	87201	98841	72860	97347	78228	100993	109987	95038	80749	84899	65283	127468	80965	99960	99462	105121	85132	50833	99819	99737	77977	33463	69710	71887	41352	115901	66207	101778	94358	97498	87764	107046	87780	69065	80233	90048	134887
64	phenylalanine-d8	internal standard (isotope labeled)			535715	200	233091	85:206.0 86:546.0 87:1857.0 88:322.0 89:293.0 90:69.0 94:254.0 95:56.0 96:178.0 97:1067.0 98:9640.0 99:1306.0 100:1868.0 101:13139.0 102:2226.0 103:1835.0 104:472.0 105:216.0 106:49.0 107:77.0 108:164.0 109:341.0 110:528.0 111:32.0 112:231.0 113:123.0 115:531.0 116:277.0 117:916.0 118:369.0 119:299.0 120:198.0 121:222.0 122:65.0 123:193.0 124:201.0 125:307.0 126:400.0 127:518.0 128:589.0 131:3766…	113472	98941	53834	74317	77552	71747	86208	76338	76224	75682	81830	79381	78305	72011	47743	77714	72988	77857	85590	85848	73153	105994	75153	88758	84192	89876	51835	78351	111578	85671	92097	98793	78623	77323	81893	101276	84076	52473	52880	89777	78295
74	oxoproline-d5	internal standard (isotope labeled)			485665	161	135514	85:1449.0 86:1263.0 87:1205.0 90:803.0 92:415.0 96:594.0 97:112.0 98:102.0 101:256.0 102:655.0 103:972.0 104:333.0 105:314.0 106:137.0 110:306.0 114:112.0 115:586.0 116:343.0 117:1014.0 118:459.0 119:726.0 120:279.0 124:907.0 128:82.0 132:749.0 133:2315.0 134:247.0 144:911.0 145:49.0 146:537.0 147:14669.0 148:1765.0 149:365.0 150:395.0 158:795.0 161:48793.0 162:6255.0 163:2176.0 164:117.0 174:126…	252215	224349	181910	235428	269586	254066	226837	276696	272536	264898	304516	270560	257226	233987	211421	265867	272596	263852	291036	246043	250492	223055	300858	306436	225043	209721	231722	258648	293675	269378	269627	321049	270868	303413	310664	352065	317993	247717	219608	308419	349035
79	Ornithine-d2	internal standard (isotope labeled)			618245	144	318175	85 49.0 88 975.0 89 162.0 91 13.0 95 19.0 96 50.0 97 11.0 98 97.0 99 184.0 100 525.0 101 311.0 102 121.0 104 253.0 110 38.0 111 65.0 112 38.0 114 161.0 115 96.0 116 179.0 117 179.0 120 18.0 124 39.0 127 216.0 128 113.0 129 123.0 130 298.0 131 186.0 132 170.0 134 53.0 140 88.0 143 316.0 144 4753.0 145 696.0 146 326.0 152 13.0 153 26.0 154 60.0 156 42.0 158 71.0 162 42.0 168 18.0 169 69.0 171 65.0 …	167947	166100	123473	102121	126972	129539	162445	151138	120839	145959	153254	140500	128764	132259	105552	173219	134227	164378	154819	173561	164619	180694	162579	175772	159442	158658	129535	166923	184434	179046	172964	209418	164098	157988	162055	236334	166018	117765	137185	190466	218030
90	methionine-d8	internal standard (isotope labeled)			428429	112	233108	87:201.0 88:154.0 89:227.0 91:84.0 92:261.0 93:194.0 94:31.0 98:23.0 102:62.0 103:207.0 104:91.0 106:32.0 108:133.0 109:51.0 112:3893.0 113:271.0 114:200.0 120:334.0 121:224.0 122:73.0 123:68.0 124:46.0 127:39.0 131:489.0 132:168.0 133:131.0 134:333.0 135:65.0 138:335.0 139:339.0 140:91.0 141:12.0 145:56.0 150:45.0 155:32.0 162:38.0 163:101.0 165:34.0 168:34.0 169:44.0 171:31.0 174:37.0 176:21.0 …	11470	12192	11583	32563	34745	38366	32672	37994	32592	30110	41008	30097	36733	32943	18574	46141	27260	36326	37352	34782	36912	14414	30627	37451	35022	12090	19589	32807	12222	40669	32107	32769	35844	38082	36144	42843	36148	25113	20853	36652	37384
91	methionine-d8	internal standard (isotope labeled)			481028	184	233105	85:52.0 87:156.0 90:101.0 91:249.0 92:116.0 93:74.0 94:81.0 95:56.0 99:43.0 101:473.0 102:244.0 103:618.0 104:236.0 105:190.0 108:263.0 109:62.0 110:24.0 116:140.0 118:80.0 119:259.0 120:87.0 123:23.0 126:84.0 132:3878.0 133:946.0 134:394.0 135:370.0 136:99.0 145:32.0 147:654.0 149:291.0 150:109.0 151:84.0 153:22.0 157:45.0 158:76.0 161:32.0 162:57.0 164:146.0 165:35.0 168:86.0 178:32.0 180:31.0 …	65229	58049	12825	27390	30688	26253	31511	29997	29815	32112	33687	33058	29849	28583	17554	29488	29337	32071	36308	40907	26819	62427	31617	39082	31612	50582	17178	30655	65241	36437	35574	39588	30364	33242	32462	35947	32688	18273	17862	33270	31498
102	lysine-d8	internal standard (isotope labeled)			660923	325	233082	85:2209.0 86:3648.0 87:6617.0 88:45403.0 89:3797.0 90:7030.0 91:12606.0 92:10650.0 93:1294.0 94:237.0 95:167.0 96:193.0 97:290.0 98:456.0 99:1465.0 100:13676.0 101:23229.0 102:19004.0 103:9691.0 104:9624.0 105:4323.0 106:1687.0 107:656.0 108:137.0 109:94.0 111:339.0 113:1940.0 114:2359.0 115:5255.0 116:9274.0 117:18103.0 118:12199.0 119:8169.0 120:3376.0 121:1058.0 122:341.0 123:168.0 124:122.0 1…	32048	28679	27692	23392	30659	32645	31889	34406	27855	34606	39664	34012	30628	31579	21961	43659	30122	38786	40577	43967	36972	40921	44574	42445	37453	38118	26132	42151	43474	45935	40343	55085	42083	40067	39737	57762	41105	26717	27945	44789	51295
106	leucine-d10	internal standard (isotope labeled)			276142	96	233089	86:22.0 87:196.0 88:392.0 89:910.0 90:222.0 92:358.0 93:219.0 94:195.0 96:46753.0 97:2665.0 102:424.0 103:5070.0 104:989.0 105:547.0 106:1002.0 107:386.0 108:104.0 109:23.0 116:216.0 122:82.0 126:30.0 131:1444.0 132:2495.0 133:474.0 135:169.0 136:22.0 147:2360.0 151:300.0 153:142.0 154:83.0 160:105.0 163:38.0 167:354.0 168:124.0 169:8.0 170:96.0 171:28.0 174:9.0 178:70.0 179:435.0 180:2078.0 181:…	109040	118532	151696	224595	232897	243475	233200	234694	220088	244091	253227	233052	220234	212832	153870	287806	225292	242824	235126	234460	243838	131418	235007	250754	224647	116522	160515	208697	115533	274171	225611	280622	236115	239604	227887	285009	232534	180620	176989	244734	303173
107	leucine-d10	internal standard (isotope labeled)			342042	168	233083	86:231.0 87:1564.0 88:901.0 90:474.0 91:137.0 93:218.0 95:113.0 96:672.0 98:100.0 101:3356.0 102:1504.0 104:15396.0 105:2075.0 106:770.0 107:412.0 114:93.0 120:2487.0 121:404.0 122:166.0 123:42.0 131:8304.0 132:3686.0 134:2727.0 135:2249.0 136:382.0 142:31.0 145:112.0 146:294.0 152:473.0 153:119.0 155:42.0 158:52.0 160:192.0 161:211.0 162:155.0 166:94.0 167:361.0 168:64496.0 169:9214.0 170:2640.0…	759127	673113	217767	381094	355452	418788	320854	473846	398796	446996	555134	443258	445946	350051	238021	365339	326754	437304	589480	617752	445375	792796	485392	552770	444042	603504	245460	467731	789702	550216	494335	479805	457260	491169	475004	470939	520141	279312	265082	522506	417546
117	isoleucine-d10	internal standard (isotope labeled)			290152	96	233097	87:170.0 88:948.0 92:81.0 93:127.0 94:105.0 96:21740.0 97:846.0 99:493.0 101:42.0 103:1542.0 104:443.0 106:58.0 114:83.0 120:41.0 123:37.0 124:23.0 126:25.0 130:127.0 131:1235.0 136:32.0 143:59.0 146:38.0 147:748.0 148:275.0 149:64.0 150:12.0 151:143.0 152:208.0 153:40.0 154:21.0 155:28.0 157:40.0 164:42.0 165:19.0 170:69.0 171:163.0 173:159.0 175:13.0 179:95.0 180:511.0 181:118.0 183:72.0 187:35…	44201	51530	64440	96026	101942	108576	106983	100015	97472	105176	106943	102714	96639	87856	68736	126198	102086	104132	98992	91000	100970	53228	101295	102340	99085	46897	68370	93235	51102	109853	94056	116561	100579	102198	97452	116033	99111	74610	77158	98103	130905
118	isoleucine-d10	internal standard (isotope labeled)			355039	168	233086	87:492.0 88:348.0 91:16.0 92:188.0 100:279.0 101:4555.0 102:1216.0 103:1379.0 104:1501.0 105:160.0 107:19.0 115:92.0 116:115.0 117:112.0 118:418.0 119:296.0 120:303.0 121:98.0 131:634.0 132:983.0 133:1564.0 134:31.0 135:711.0 145:127.0 146:41.0 147:5656.0 148:1377.0 149:315.0 150:111.0 151:55.0 152:240.0 161:173.0 168:26650.0 169:3536.0 170:749.0 178:24.0 179:74.0 181:40.0 204:50.0 219:4225.0 220…	238665	225011	94686	124858	150297	141285	130900	164267	136075	158001	184902	152097	151734	149711	102917	161669	132115	168900	196271	216726	155240	260700	172490	197450	149579	187629	110196	160754	254900	195140	169261	184318	169259	174876	170651	202027	181442	118271	116105	185331	178794
119	isoleucine-d09	internal standard (isotope labeled)			355460	167	233243	85:59.0 91:53.0 92:109.0 101:251.0 102:162.0 104:121.0 114:10.0 121:84.0 133:254.0 134:105.0 135:94.0 137:49.0 144:23.0 147:660.0 148:287.0 162:81.0 165:51.0 167:2365.0 170:64.0 179:133.0 204:50.0 220:177.0 242:113.0 281:37.0 285:33.0 289:16.0 297:23.0 319:15.0 323:21.0 332:15.0 339:14.0 368:21.0 371:19.0 393:32.0 418:17.0 445:21.0 491:13.0 497:21.0 500:9.0	18996	17627	7179	9669	11774	11157	10390	12746	10393	12534	14576	11953	11669	12058	7882	12536	10265	13345	15882	17458	12248	20783	13677	20315	12093	14689	11566	13018	20785	15338	13504	14606	13554	14059	16557	15911	14489	9835	12401	15058	18485
128	HomoCysteine-d4	internal standard (isotope labeled)			499573	222	351114	86 886.0 88 617.0 90 721.0 92 304.0 95 118.0 99 419.0 100 7882.0 101 3425.0 102 5993.0 103 2657.0 104 665.0 106 338.0 107 358.0 111 211.0 114 142.0 115 263.0 117 6245.0 118 2695.0 119 476.0 121 126.0 125 81.0 130 1538.0 131 1669.0 132 466.0 133 502.0 134 4572.0 135 922.0 136 149.0 141 144.0 142 163.0 147 10205.0 148 3219.0 149 1399.0 150 837.0 152 36.0 160 302.0 163 304.0 164 74.0 165 114.0 169 2…	13035	8120	1882	6010	5645	3870	10319	4230	6760	4833	6894	6948	5689	2561	2280	4254	6298	5441	8892	6702	5656	12807	5216	6593	8197	9970	2381	6380	13617	3427	7459	7839	4809	6335	5669	7857	5895	1755	2582	7245	4484
129	Histidine-d4	internal standard (isotope labeled)			663065	158	320304	85 776.0 86 548.0 87 1240.0 88 463.0 95 22.0 96 85.0 97 94.0 99 91.0 100 565.0 101 1544.0 102 495.0 103 199.0 104 170.0 105 94.0 111 109.0 112 115.0 113 25.0 115 164.0 116 334.0 118 224.0 119 120.0 123 39.0 124 85.0 125 44.0 130 172.0 131 699.0 132 941.0 133 888.0 134 192.0 135 108.0 138 43.0 142 367.0 145 209.0 148 394.0 150 56.0 155 291.0 157 1025.0 158 14006.0 159 2306.0 160 2271.0 161 277.0 1…	171952	180143	154478	126160	156031	143114	198331	149403	124482	143538	181255	168525	165776	143771	101599	179058	123702	177095	216221	172345	124286	193446	178551	177335	234845	179773	110122	172907	198536	194719	154908	216551	186947	168093	174617	244295	184708	97053	105213	211047	182064
134	glycine-d2	internal standard (isotope labeled)			254772	104	233101	85:1244.0 96:91.0 103:768.0 104:9529.0 105:829.0 106:330.0 107:240.0 126:63.0 140:129.0 144:31.0 147:2529.0 151:22.0 164:25.0 178:446.0 179:81.0 180:40.0 184:118.0 185:24.0 193:42.0 206:251.0 218:51.0 227:28.0 229:23.0 244:16.0 254:67.0 257:9.0 261:29.0 262:15.0 263:31.0 264:20.0 266:20.0 277:15.0 282:30.0 283:25.0 291:15.0 296:19.0 304:38.0 314:27.0 321:19.0 334:22.0 349:35.0 358:26.0 359:14.0 3…	431157	530335	33539	231382	208347	211200	209032	169695	198186	191364	195016	212237	235622	158380	105388	206442	170199	155298	198850	175259	113767	308013	161113	190622	223336	185708	79363	169417	196959	163810	103089	132857	131910	133466	110434	93530	134951	73578	70107	112546	117194
135	glycine-d2	internal standard (isotope labeled)			367378	250	233080	85:1549.0 87:6846.0 88:79441.0 89:7673.0 90:3152.0 91:416.0 92:131.0 94:19.0 96:192.0 99:1009.0 100:7116.0 101:34808.0 102:8490.0 103:5637.0 104:4138.0 105:1421.0 106:679.0 107:219.0 108:75.0 109:80.0 110:480.0 113:1770.0 114:1467.0 115:2242.0 116:4641.0 117:5653.0 118:8882.0 119:2734.0 120:2489.0 121:493.0 122:156.0 124:31.0 129:817.0 130:10292.0 131:10045.0 132:4692.0 133:8168.0 134:29672.0 135…	103503	126116	198050	79893	109837	104854	110051	133985	102447	125348	139860	114349	102675	106912	103590	159943	118990	149710	137136	142978	157871	154038	141635	150307	109374	119178	122048	149883	191630	163515	171642	208984	157322	159402	166194	231534	167824	110180	145393	180669	234735
143	glutamine-d5 dehydrated 2tms	internal standard (isotope labeled)			491727	160	233110	86:156.0 90:36.0 91:39.0 93:38.0 114:79.0 116:98.0 124:34.0 125:26.0 160:3262.0 161:1276.0 235:64.0 238:19.0 261:10.0 262:91.0 263:55.0 342:19.0 343:33.0 345:26.0 394:24.0 445:19.0 456:21.0 474:28.0 476:20.0 494:18.0	15803	21977	12267	32892	46244	54028	14270	45121	37915	48680	59127	46141	42115	27392	24796	45487	38253	46356	42980	47825	27000	25316	38145	44063	19932	8312	22649	36260	22262	45691	23543	36930	34808	36263	34084	24989	36936	15969	24790	27280	49454
144	glutamine-d5 dehydrated	internal standard (isotope labeled)			517310	232	233164	87:38.0 102:24.0 103:58.0 104:12.0 114:44.0 116:175.0 117:45.0 118:42.0 120:34.0 126:48.0 127:124.0 129:62.0 131:85.0 132:107.0 133:275.0 134:154.0 137:14.0 144:360.0 148:83.0 157:140.0 158:336.0 159:79.0 175:27.0 179:21.0 201:24.0 204:27.0 209:27.0 215:83.0 216:40.0 217:108.0 218:55.0 219:42.0 231:124.0 232:411.0 233:96.0 234:39.0 254:23.0 256:17.0 305:12.0 306:175.0 307:35.0 308:27.0 313:21.0 3…	3658	4351	3074	3261	929	3824	2286	3456	4027	3562	5696	3323	2760	2902	3226	2624	3303	5104	5834	4344	2558	3958	3762	4482	2938	2269	2108	3312	4398	4148	3127	3020	2458	2567	3190	3222	3143	1624	2379	2480	3411
145	glutamine-d5 2TMS	internal standard (isotope labeled)			568873	178	233100	85:96.0 86:348.0 87:1859.0 88:4973.0 89:1724.0 90:532.0 91:1733.0 92:1305.0 93:260.0 94:96.0 98:14.0 99:144.0 100:110.0 101:129.0 102:180.0 103:401.0 104:205.0 105:76.0 106:77.0 109:11.0 110:62.0 113:43.0 114:46.0 115:319.0 116:179.0 117:1611.0 118:1239.0 119:561.0 122:40.0 128:158.0 131:655.0 132:874.0 133:1216.0 134:1102.0 135:241.0 138:42.0 141:62.0 142:325.0 143:619.0 144:418.0 145:212.0 146:…	11433	15377	12558	18068	21714	23374	11932	25651	21953	26476	23655	24562	21469	21999	17991	38803	21063	22325	21112	28727	23126	17339	23530	25728	16840	9921	18342	21049	15826	28672	19453	28489	25680	27533	23742	23918	23849	18039	21633	23173	34409
146	glutamine-d4	internal standard (isotope labeled)			599218	159	233093	85:793.0 86:1300.0 87:3226.0 89:782.0 91:196.0 92:314.0 93:209.0 95:45.0 96:122.0 99:268.0 100:1370.0 101:1617.0 102:1440.0 103:6328.0 104:717.0 105:340.0 106:50.0 110:124.0 111:109.0 112:151.0 113:257.0 114:432.0 115:1183.0 116:1746.0 117:2576.0 118:1251.0 120:114.0 124:37.0 128:649.0 129:1835.0 130:2197.0 131:3648.0 132:2556.0 133:5791.0 141:342.0 142:1757.0 143:1022.0 145:654.0 146:310.0 147:1…	69768	78379	237473	58436	45659	52820	220551	17031	60005	234943	256936	271576	250629	231332	41607	61893	54671	62155	81946	66005	56114	341211	250981	295066	92963	284112	44383	26010	20706	292573	61008	60752	280668	59443	29839	76941	251979	160892	41871	324457	275350
151	glutamate-d5	internal standard (isotope labeled)			486657	179	233109	88:5746.0 89:6798.0 90:553.0 92:116.0 93:56.0 100:113.0 103:259.0 104:177.0 106:21.0 113:133.0 117:334.0 118:420.0 120:149.0 131:181.0 132:388.0 136:42.0 138:33.0 139:109.0 150:120.0 152:71.0 163:1652.0 164:211.0 165:120.0 177:79.0 178:469.0 179:3955.0 180:434.0 181:212.0 190:381.0 191:524.0 192:76.0 193:82.0 194:41.0 195:30.0 198:19.0 199:11.0 200:18.0 202:18.0 205:91.0 206:95.0 208:613.0 209:10…	13959	15363	21750	22337	29975	35714	24289	34593	26784	37604	43397	33503	28379	36010	24568	46618	28882	37729	38895	39511	27779	16451	37114	37212	28332	12205	25513	25086	14292	43404	21804	37069	33709	36250	32121	36169	31614	27655	29242	31190	47082
152	glutamate-d5	internal standard (isotope labeled)			527384	251	233102	86:101.0 87:447.0 88:473.0 89:3366.0 90:348.0 91:24.0 100:120.0 101:591.0 102:347.0 103:1054.0 104:324.0 105:101.0 115:237.0 116:192.0 117:398.0 118:320.0 119:306.0 120:151.0 129:37.0 130:161.0 131:143.0 132:4359.0 133:2727.0 134:910.0 135:255.0 136:89.0 143:302.0 144:432.0 145:18.0 146:113.0 147:2870.0 148:655.0 150:513.0 151:71.0 158:99.0 159:140.0 160:1564.0 161:1472.0 162:267.0 163:547.0 164:…	113563	95927	60557	70858	74957	74444	81767	79036	70596	76265	84267	81029	77121	81513	52286	90766	73303	78263	87385	88786	76090	99374	77205	92409	82968	91579	56531	81463	99730	88623	86595	103951	85227	79707	82198	95811	84427	60630	62704	88641	89750
153	glutamate-d4	internal standard (isotope labeled)			528978	250	134335	85:6277.0 86:12791.0 87:17828.0 88:32002.0 89:2968.0 90:443.0 91:466.0 93:301.0 94:178.0 95:434.0 96:267.0 97:334.0 98:1395.0 99:2042.0 100:10638.0 101:16474.0 102:12654.0 103:6678.0 104:1802.0 105:1614.0 106:329.0 107:179.0 109:251.0 110:323.0 111:315.0 112:1020.0 113:1902.0 114:2990.0 115:7642.0 116:4450.0 117:9945.0 118:3560.0 119:2835.0 120:472.0 121:367.0 122:73.0 123:90.0 124:180.0 125:146.…	17206	11879	8131	8541	9875	9717	10467	10202	8882	9291	9878	10510	9150	11930	5040	12045	9027	9447	10835	11182	9432	12844	9495	11809	11197	13184	6811	9803	11855	12247	10983	13320	10866	10191	10024	11977	10413	8625	8458	10488	10858
163	galactose	internal standard (isotope labeled)			647344	319	18170	85:620.0 86:2348.0 87:2074.0 88:1466.0 89:22824.0 90:1966.0 91:898.0 97:640.0 99:1455.0 100:3867.0 101:6075.0 102:3366.0 103:44973.0 104:4301.0 105:11826.0 106:888.0 107:318.0 110:106.0 111:644.0 112:551.0 113:1365.0 114:3837.0 115:2232.0 116:2050.0 117:35884.0 118:3511.0 119:3431.0 120:215.0 121:47.0 123:25.0 124:36.0 125:81.0 126:497.0 127:465.0 128:1073.0 129:39974.0 130:6567.0 131:10141.0 132…	4157789	4278044	4090209	3656242	3931137	3785264	5753437	3954468	3821488	4124035	4253365	4241363	4183767	4169599	4168857	4182296	3905023	4096871	4241237	4273504	3699252	3966996	4269621	4131726	4506710	4087730	4269789	4185407	3997627	4306459	3931026	4184905	4241038	4022231	4204352	4670490	4228998	3994783	4347465	4392464	4024995
187	behenic acid	internal standard (isotope labeled)			920648	117	46315	89:63.0 90:3.0 96:62.0 98:113.0 116:141.0 117:2302.0 118:208.0 121:9.0 123:25.0 129:995.0 130:112.0 131:119.0 132:880.0 133:179.0 135:29.0 136:5.0 137:25.0 142:23.0 143:98.0 145:236.0 146:32.0 148:40.0 149:92.0 150:14.0 151:20.0 159:48.0 171:13.0 173:12.0 176:19.0 185:40.0 187:53.0 195:1.0 196:10.0 200:36.0 202:12.0 205:33.0 216:10.0 219:5.0 226:7.0 227:15.0 231:24.0 235:4.0 241:33.0 243:42.0 247…	1810	1432	1908	1250	2661	1588	1063	2106	1198	1116	2200	2574	1082	3391	735	1552	1114	1331	2093	2774	1555	1768	1457	1839	1240	1411	1565	1350	1482	2280	2196	2691	1258	1986	1063	1374	1145	1461	1192	2516	1567
189	aspartate-d3	internal standard (isotope labeled)			431932	163	227921	86:109.0 87:803.0 88:443.0 89:567.0 90:267.0 100:424.0 102:890.0 103:2913.0 104:2425.0 105:1134.0 115:341.0 116:165.0 117:3056.0 118:950.0 119:11167.0 120:1074.0 121:471.0 127:184.0 128:61.0 129:104.0 130:1652.0 131:11391.0 132:1714.0 133:1763.0 134:174.0 135:41.0 136:38.0 142:44.0 146:847.0 147:7748.0 148:1135.0 149:120.0 150:233.0 155:28.0 161:122.0 163:13329.0 164:1640.0 165:633.0 174:19.0 175…	14101	14215	20556	24516	28750	32751	25750	32620	26446	31205	35887	30136	27508	30356	22309	41114	27548	32379	34725	32951	30470	16727	32779	33310	28311	11922	25395	27209	13932	36036	25517	34928	31493	32150	29404	37258	31077	23832	25907	30663	41781
190	aspartate-d3	internal standard (isotope labeled)			478635	235	227919	85:854.0 86:702.0 87:2299.0 88:539.0 89:488.0 90:635.0 92:147.0 93:124.0 98:90.0 99:274.0 100:4692.0 101:10972.0 102:2848.0 103:25585.0 104:3360.0 105:1517.0 106:281.0 109:80.0 110:148.0 111:39.0 112:37.0 113:201.0 115:848.0 116:1124.0 117:3438.0 118:2376.0 119:3712.0 120:3404.0 121:398.0 122:869.0 123:115.0 124:51.0 128:120.0 129:250.0 130:1146.0 131:7135.0 132:3596.0 133:5726.0 134:2996.0 135:9…	66540	58319	21772	28495	31205	28538	34818	29436	30434	32248	34009	33561	30618	31174	20304	28019	30766	33288	35762	38682	28062	56568	30594	38253	36137	52086	20226	34445	60977	34969	40286	42708	31390	32250	33385	38528	33976	21647	20187	35948	30373
192	asparagine-d3	internal standard (isotope labeled)			552740	234	233126	85:85.0 86:14.0 87:70.0 88:67.0 89:137.0 100:237.0 101:427.0 103:984.0 104:136.0 105:48.0 114:63.0 117:129.0 118:559.0 119:1924.0 120:220.0 121:77.0 131:130.0 133:396.0 134:403.0 135:989.0 136:105.0 137:13.0 138:19.0 142:21.0 143:25.0 144:398.0 146:123.0 147:1091.0 148:132.0 149:102.0 150:48.0 156:363.0 157:51.0 158:10.0 160:23.0 162:130.0 163:57.0 172:61.0 174:99.0 188:604.0 189:90.0 190:141.0 2…	24920	33387	18123	13965	14828	14513	18070	13722	13687	14001	16026	13802	13653	14159	14565	12241	13315	14792	16875	15133	12603	20208	13698	16008	16485	17619	14459	13657	18000	14947	15585	18038	13624	12472	13468	17001	13296	9230	15242	15719	13490
200	alanine-d4	internal standard (isotope labeled)			241972	120	233078	85:1016.0 86:841.0 87:3871.0 88:2432.0 89:2329.0 90:9989.0 91:682.0 92:463.0 93:92.0 94:1041.0 95:930.0 96:6661.0 97:774.0 99:553.0 101:7811.0 102:1762.0 103:19968.0 104:12869.0 105:6563.0 106:5303.0 107:332.0 108:118.0 113:666.0 114:249.0 115:2522.0 117:1968.0 118:635.0 120:323703.0 121:36709.0 122:12794.0 123:1033.0 131:8002.0 132:6824.0 133:6371.0 134:5777.0 135:1108.0 136:437.0 147:68044.0 14…	1339001	1297818	743622	812547	679649	692465	837141	654488	812491	644627	743231	760246	822438	495077	498114	808025	776931	728529	765500	724239	618239	1359046	653544	550926	807736	1117173	461336	862569	1493862	777057	769431	727828	699358	715558	679414	701932	766583	479033	500097	765011	833562
217	2-hydroxybutyric acid_d3	internal standard (isotope labeled)			256431	134	318133	85:49.0 87:235.0 88:143.0 89:68.0 90:50.0 92:25.0 93:27.0 98:34.0 99:28.0 100:95.0 101:159.0 103:144.0 105:60.0 113:35.0 115:58.0 116:78.0 117:323.0 118:135.0 119:79.0 120:20.0 125:20.0 132:208.0 133:986.0 134:8168.0 135:885.0 136:268.0 139:31.0 143:61.0 145:82.0 147:7799.0 148:1287.0 149:834.0 150:107.0 151:45.0 154:31.0 159:25.0 163:29.0 164:35.0 166:30.0 171:23.0 173:26.0 182:21.0 185:34.0 186…	191067	189431	180909	200907	211638	214638	223059	211586	205372	222870	240783	218747	212319	180517	145545	251244	208073	219873	239922	239460	209471	208611	223531	227581	232065	174147	139398	217233	218634	259159	215038	252547	222616	225919	233912	277710	229494	168004	161398	229351	258335
221	2-aminobutyric acid - d6	internal standard (isotope labeled)			283876	136	318135	89:73.0 92:33.0 94:16.0 95:17.0 101:183.0 102:55.0 103:168.0 104:73.0 107:36.0 108:21.0 112:16.0 122:33.0 131:20.0 132:31.0 133:75.0 135:132.0 136:2502.0 137:276.0 138:80.0 143:100.0 144:35.0 145:40.0 147:375.0 148:144.0 149:78.0 152:28.0 158:8.0 161:17.0 164:17.0 166:16.0 169:14.0 194:17.0 210:76.0 219:39.0 225:17.0 229:17.0 230:15.0 231:14.0 236:17.0 238:41.0 239:14.0 240:27.0 251:19.0 266:14.0…	138571	126776	48947	57052	59636	57835	68502	60315	63454	60788	68209	60913	65410	54414	41365	69005	60488	65191	64081	67600	55876	146319	59488	68289	60960	118433	39642	65613	150768	69233	71773	71779	62710	65685	60736	67040	64857	46650	46735	64603	71174
209	3-hydroxybutyric acid_d4	internal standard (isotope labeled)			276658	121	318131	85:1044.0 86:277.0 87:637.0 89:216.0 90:3720.0 91:518.0 92:67.0 96:4609.0 97:262.0 98:21.0 99:183.0 100:407.0 101:61.0 102:592.0 103:980.0 104:386.0 105:481.0 106:177.0 107:332.0 108:52.0 111:102.0 112:23.0 115:45.0 116:162.0 118:538.0 119:197.0 120:117.0 121:8250.0 122:825.0 123:333.0 124:33.0 125:9.0 126:120.0 127:427.0 128:26.0 131:1156.0 132:369.0 133:2458.0 134:1296.0 135:334.0 136:74.0 137:…	221207	200942	192204	212648	229083	225699	233516	239665	220022	243665	267787	234564	227966	229312	169845	278379	225360	248473	259211	284123	231944	233235	247014	278533	252305	211955	173867	240335	222771	297232	243660	289899	257255	263317	248830	317757	249498	221108	204013	260197	299503
14	xylose	identified compound	SRBFZHDQGSBBOR-IOVATXLUSA-N	135191	543267	103	169	86 77.0 87 118.0 89 838.0 90 80.0 91 46.0 94 19.0 96 63.0 98 48.0 99 37.0 100 186.0 101 192.0 102 469.0 103 7719.0 104 659.0 105 379.0 106 26.0 112 23.0 114 254.0 115 75.0 117 652.0 118 60.0 119 80.0 120 23.0 121 17.0 124 30.0 127 70.0 128 49.0 129 515.0 130 102.0 131 344.0 133 894.0 134 104.0 135 66.0 137 49.0 142 48.0 143 43.0 144 51.0 145 65.0 147 2699.0 148 283.0 149 250.0 151 31.0 155 21.0 1…	2969	4022	20639	3284	1567	3264	3722	724	3311	1775	3819	4221	3375	722	4654	2147	1654	772	2184	4053	5443	4626	4424	4825	3847	3236	6209	4936	1777	4579	4162	4650	4227	3190	4524	4649	3832	3141	3393	4854	4165
15	xylitol	identified compound	HEBKCHPVOIAQTA-NGQZWQHPSA-N	6912	567437	217	5857	85:22.0 87:53.0 88:95.0 89:312.0 94:15.0 99:38.0 101:376.0 103:3875.0 104:345.0 105:78.0 107:25.0 108:24.0 110:68.0 113:18.0 115:63.0 116:117.0 117:1418.0 118:103.0 119:73.0 129:1604.0 130:163.0 131:367.0 132:26.0 133:712.0 135:29.0 142:33.0 143:88.0 147:3295.0 148:560.0 149:319.0 155:12.0 157:214.0 159:20.0 163:58.0 169:22.0 171:40.0 175:99.0 182:58.0 189:476.0 190:74.0 191:333.0 192:19.0 193:15…	2560	3379	3661	924	1304	2101	2021	2141	1731	1795	772	3440	1179	2160	2748	1687	1425	1844	2113	2195	979	1466	1450	1238	3226	1970	3185	1110	1729	1607	1502	4896	7712	272	5698	1963	1706	2716	3300	1807	1502
18	valine 1TMS	identified compound	KZSNJWFQEVHDMF-BYPYZUCNSA-N	6287	239426	156	585	85:1256.0 86:1369.0 87:2965.0 88:512.0 89:370.0 91:1184.0 100:568.0 101:201.0 102:1338.0 103:4662.0 104:197.0 105:274.0 109:39.0 112:180.0 113:675.0 115:160.0 117:295.0 118:385.0 126:74.0 128:2220.0 129:580.0 130:4523.0 131:1353.0 132:462.0 138:59.0 142:37.0 144:75.0 146:5600.0 147:1520.0 148:729.0 149:446.0 151:192.0 152:157.0 153:40.0 156:3536.0 157:617.0 158:341.0 170:15.0 174:1874.0 175:308.0…	7756	11442	19843	19194	21262	21164	35198	18892	16391	18878	27767	21487	15785	23915	22292	18652	22773	26424	29968	30965	15936	8509	24535	28184	23796	7587	26311	15314	7701	38885	19280	18827	17817	19271	24422	34874	35457	19056	25581	23093	30365
19	valine	identified compound	KZSNJWFQEVHDMF-BYPYZUCNSA-N	6287	309359	144	34069	85:2124.0 86:7630.0 87:1944.0 88:1239.0 89:198.0 90:140.0 92:81.0 94:103.0 95:66.0 96:941.0 97:782.0 98:2720.0 99:1558.0 100:41058.0 101:6555.0 102:3952.0 103:6374.0 104:899.0 105:633.0 110:1390.0 111:263.0 112:2218.0 113:1055.0 114:6510.0 115:2943.0 116:1153.0 117:4102.0 118:1273.0 119:1387.0 120:34.0 121:95.0 122:89.0 123:66.0 124:112.0 125:82.0 126:230.0 128:5308.0 129:3668.0 130:4722.0 131:52…	1081993	1101952	358867	420739	432702	385119	785291	397850	388807	373715	542066	465673	346375	476871	432292	289036	548938	490150	656439	689407	290987	879230	389976	579972	519215	876682	407781	357318	1097237	617926	491162	309283	363812	394963	520886	537634	749051	323832	402357	402462	490874
20	uridine	identified compound	DRTQHJPVMGBUCF-XVFCMESISA-N	6029	856709	224	4705	85:3400.0 86:2032.0 87:2033.0 88:833.0 89:4255.0 90:331.0 91:52.0 92:133.0 93:460.0 94:986.0 95:954.0 96:3055.0 97:2191.0 98:2262.0 99:22400.0 100:12813.0 101:9196.0 102:3886.0 103:26772.0 104:2353.0 105:1631.0 106:284.0 107:23.0 108:453.0 109:659.0 110:906.0 111:2680.0 112:1258.0 113:6338.0 114:1321.0 115:5904.0 116:4089.0 117:10224.0 118:1211.0 119:1686.0 120:424.0 121:176.0 122:293.0 123:108.0…	1123	1289	1693	936	423	827	1288	959	705	847	1805	2002	970	1097	1817	490	1200	1004	1417	887	402	1134	1736	1081	1432	1304	1718	1645	1104	1370	941	1880	1182	1413	1448	1922	755	1538	1259	2649	2053
21	uric acid	identified compound	LEHOTFFKMJEONL-UHFFFAOYSA-N	1175	733704	441	390542	85:3006.0 86:5154.0 87:3017.0 88:706.0 89:685.0 91:208.0 92:147.0 93:161.0 94:85.0 95:336.0 96:306.0 97:450.0 98:2631.0 99:3540.0 100:32370.0 101:4842.0 102:2564.0 103:7632.0 104:909.0 105:1432.0 106:210.0 107:202.0 108:137.0 109:288.0 110:648.0 111:2136.0 112:611.0 113:1768.0 114:1646.0 115:2846.0 116:1906.0 117:4732.0 118:851.0 119:1234.0 120:212.0 121:150.0 122:111.0 123:193.0 124:531.0 125:10…	138612	169271	146755	82728	105437	158468	145894	107321	106613	88204	157589	86777	132494	164341	190048	80861	122097	145006	173036	289743	89927	58101	140088	115299	265244	146493	198506	90235	202100	286923	137422	169845	105016	97056	137346	156924	218799	137810	187087	288447	104855
22	urea	identified compound	XSQUKJJJFZCRTK-UHFFFAOYSA-N	1176	323728	189	34052	85 1643.0 86 1042.0 87 2798.0 88 472.0 89 89.0 90 238.0 92 10.0 96 331.0 97 737.0 98 177.0 99 14928.0 100 5438.0 101 1997.0 102 661.0 103 681.0 104 133.0 106 14.0 107 123.0 108 8.0 109 64.0 110 131.0 111 2556.0 112 219.0 113 840.0 114 1606.0 115 1200.0 116 836.0 118 112.0 122 8.0 125 126.0 126 281.0 127 174.0 128 74.0 130 2974.0 131 2520.0 132 2301.0 133 1256.0 134 466.0 135 55.0 138 54.0 139 390…	953249	2168498	1461579	1432141	1790237	1951998	1652221	1835151	1603288	1842628	2159635	1549657	1179966	1660375	1905741	1463136	1752053	1993632	399254	675318	1430654	1238716	133543	2118373	1824581	761507	1981389	1681118	1147154	2340418	1611092	1783610	1379790	1707891	1400674	2024892	1812702	1635623	2085676	1763956	2387864
23	uracil	identified compound	ISAKRJDGNUQOIC-UHFFFAOYSA-N	1174	385735	241	1664	85:23877.0 86:6864.0 87:3486.0 88:1560.0 89:1505.0 91:506.0 92:1505.0 94:764.0 95:4144.0 96:5848.0 97:5576.0 98:15495.0 99:393975.0 100:73814.0 101:20186.0 102:4727.0 103:6833.0 104:172.0 105:13750.0 106:1345.0 107:925.0 108:1437.0 109:10645.0 110:283.0 111:5609.0 112:2648.0 113:93747.0 114:5531.0 115:7598.0 116:2368.0 117:12999.0 118:2279.0 119:775.0 120:2223.0 122:686.0 123:297.0 124:2309.0 125…	807	581	276	273	664	391	413	367	367	364	487	585	355	473	510	451	419	477	545	722	370	498	497	265	571	508	751	659	598	551	535	627	496	617	617	772	578	919	972	767	302
24	UDP-glucuronic acid	identified compound	HDYANYHVCAPMJV-LXQIFKJMSA-N	17473	587601	217	7831	87 154.0 89 34.0 96 10.0 97 71.0 98 2.0 99 102.0 101 913.0 103 713.0 111 84.0 113 761.0 114 53.0 115 189.0 116 678.0 117 1036.0 118 23.0 120 1.0 124 3.0 128 50.0 129 1720.0 130 197.0 131 702.0 132 269.0 133 1146.0 134 40.0 135 54.0 141 21.0 142 1.0 143 1068.0 144 123.0 145 349.0 146 24.0 147 2345.0 148 317.0 149 145.0 157 154.0 159 13.0 169 322.0 171 136.0 175 127.0 185 29.0 187 46.0 188 4.0 189 …	796	666	1346	543	614	855	614	1221	620	473	1046	759	465	1106	1288	754	493	756	957	900	484	2952	1015	1515	3056	868	938	1279	1076	1654	747	2295	1156	981	2497	1271	711	999	1086	798	960
26	tyrosine	identified compound	OUYCCCASQSFEME-QMMMGPOBSA-N	6057	653185	179	7406	85:883.0 86:513.0 87:832.0 88:568.0 89:5773.0 90:997.0 91:713.0 92:77.0 93:53.0 96:68.0 97:160.0 98:113.0 99:610.0 100:567.0 101:3434.0 102:844.0 103:6511.0 104:594.0 105:780.0 106:100.0 107:182.0 109:27.0 110:101.0 111:293.0 112:25.0 113:360.0 114:484.0 115:996.0 116:1227.0 117:4144.0 118:793.0 119:933.0 120:11.0 121:1.0 125:8.0 126:213.0 127:567.0 129:3745.0 130:926.0 131:1586.0 132:170.0 133:5…	17418	23657	24260	19547	36929	39854	29676	26757	22663	41785	43795	37947	31825	37898	33673	43849	22955	33175	39465	58166	19628	24688	31153	31654	33876	20268	32954	16685	21776	67913	21845	47651	29361	28289	29284	38112	53508	24829	36524	35716	46958
27	tyrosine	identified compound	OUYCCCASQSFEME-QMMMGPOBSA-N	6057	673283	218	68070	85:101.0 86:1059.0 87:458.0 89:659.0 90:823.0 91:1849.0 92:215.0 93:210.0 94:46.0 95:258.0 97:226.0 100:19804.0 101:2641.0 102:1366.0 103:1633.0 104:401.0 105:1066.0 107:424.0 113:79.0 115:546.0 116:116.0 117:900.0 118:715.0 119:703.0 120:181.0 121:365.0 123:63.0 124:32.0 125:60.0 128:317.0 129:136.0 130:2787.0 131:1381.0 132:2378.0 133:2406.0 135:1073.0 136:172.0 137:139.0 138:33.0 143:94.0 144:…	317336	338555	284191	195967	292455	260183	371964	167977	163210	255706	315428	263201	272568	307678	245909	285594	183761	315630	388772	445195	171951	230209	258685	235364	563337	300035	261400	152420	268736	553589	225072	417009	248994	256987	210004	458864	433689	231762	281116	362590	352810
29	tryptophan 3TMS	identified compound	QIVBCDIJIAJPQS-VIFPVBQESA-N	6305	780482	202	14	86:650.0 87:425.0 89:261.0 100:3562.0 101:1584.0 102:1611.0 103:773.0 104:190.0 113:59.0 114:89.0 115:489.0 118:184.0 119:183.0 127:218.0 130:2243.0 131:264.0 132:923.0 133:652.0 144:250.0 145:420.0 146:217.0 147:2097.0 148:245.0 149:212.0 154:44.0 156:266.0 157:161.0 158:212.0 159:339.0 160:439.0 161:112.0 162:7.0 170:343.0 171:149.0 172:244.0 173:187.0 174:182.0 175:114.0 177:48.0 182:53.0 183:…	226486	238245	191326	109550	216977	130849	236591	146800	137254	172511	211891	264795	190630	221199	196200	154018	152529	251705	290636	329330	92429	227278	250592	222908	263595	202066	193869	115485	215799	298079	173728	254721	191522	181580	158922	281229	265482	171926	205179	228476	250467
30	trans-4-hydroxyproline	identified compound	PMMYEEVYMWASQN-DMTCNVIQSA-N	5810	460061	158	598	86:496.0 88:18.0 90:38.0 91:40.0 100:34.0 101:5.0 106:27.0 107:16.0 108:57.0 110:12.0 111:3.0 116:445.0 118:584.0 120:50.0 124:71.0 128:2.0 130:368.0 133:14.0 134:244.0 135:1.0 136:2.0 137:3.0 142:291.0 143:10.0 148:375.0 150:25.0 153:1.0 158:3885.0 159:532.0 160:154.0 170:138.0 171:41.0 180:2.0 181:4.0 183:3.0 184:35.0 185:30.0 186:36.0 195:2.0 199:2.0 212:1.0 213:2.0 225:8.0 237:2.0 239:1.0 241…	1885	3179	8621	3904	2797	5475	5023	8765	3793	3513	4416	3779	4027	5382	5548	3858	3971	6388	7444	3882	3069	2819	6147	10272	5670	2414	5107	2443	3611	7871	5313	5352	6106	4128	6805	6731	6017	3341	6438	8367	6413
31	trans-4-hydroxyproline	identified compound	PMMYEEVYMWASQN-DMTCNVIQSA-N	5810	484934	140	97	86 372.0 89 284.0 90 59.0 91 69.0 92 49.0 93 31.0 94 113.0 98 417.0 99 325.0 100 732.0 101 893.0 102 221.0 103 507.0 104 90.0 105 127.0 108 76.0 113 184.0 115 459.0 116 227.0 117 406.0 118 167.0 119 229.0 121 37.0 122 66.0 124 225.0 129 565.0 131 516.0 132 187.0 133 938.0 135 153.0 137 32.0 138 53.0 140 11400.0 141 1426.0 142 1450.0 143 252.0 144 87.0 145 79.0 147 2770.0 148 205.0 149 527.0 150 1…	26313	37982	14404	9073	9675	9165	16107	16102	10663	5081	14614	14231	13328	12099	16731	8227	10721	13030	19263	11205	7627	20004	12527	22633	13392	18472	11853	7791	35991	16027	19013	11681	10607	7615	16888	17930	13686	7005	12530	19847	10653
34	threonine minor	identified compound	AYFVYJQAPQTCCC-GBXIJSLDSA-N	6288	360475	219	42	86:663.0 87:2369.0 88:530.0 89:603.0 91:419.0 98:491.0 99:316.0 100:402.0 101:696.0 102:718.0 103:435.0 104:252.0 111:58.0 112:151.0 114:506.0 115:862.0 116:671.0 117:12456.0 118:1360.0 119:471.0 123:36.0 126:52.0 128:366.0 129:191.0 130:9095.0 131:3464.0 132:2504.0 133:811.0 134:288.0 136:53.0 142:151.0 144:114.0 145:78.0 146:2490.0 147:4409.0 148:1120.0 152:17.0 153:24.0 156:103.0 157:97.0 160:…	11341	21263	32154	2245	34911	22645	24000	31434	13845	28789	33741	29710	28707	28975	35198	20327	16194	28677	33578	24257	22375	12975	25558	32596	30174	10564	35076	38919	14705	50229	38659	42384	25474	32653	30267	41769	35708	22920	38411	33633	33737
35	threonine	identified compound	AYFVYJQAPQTCCC-GBXIJSLDSA-N	6288	409568	218	26	85:3292.0 86:8314.0 87:9239.0 88:2146.0 89:1384.0 90:306.0 91:153.0 92:315.0 94:182.0 97:494.0 98:2338.0 100:29753.0 101:59367.0 102:12275.0 103:7014.0 104:972.0 105:1395.0 108:157.0 109:69.0 110:316.0 112:1534.0 113:915.0 114:5652.0 115:7842.0 116:2291.0 117:82641.0 118:9093.0 119:5575.0 120:42.0 121:295.0 122:99.0 125:29.0 128:17938.0 129:15821.0 130:16106.0 131:15835.0 132:12042.0 133:17512.0 …	107707	143093	34309	25535	36202	21426	29668	31607	15855	32353	38524	33720	30715	35036	36243	20953	18443	30392	38049	34977	22133	92814	28366	39497	33101	79368	37833	44335	131664	57216	50563	54665	28370	34705	34595	48368	39780	24431	45289	39625	42595
36	threonic acid	identified compound	JPIJQSOTBSSVTP-STHAYSLISA-N	5460407	497572	292	172	86:78.0 87:500.0 88:136.0 89:1131.0 90:139.0 91:82.0 95:22.0 98:80.0 99:146.0 101:890.0 102:4177.0 103:5003.0 104:619.0 105:374.0 111:46.0 112:15.0 113:201.0 115:359.0 116:115.0 117:5872.0 118:496.0 119:430.0 121:39.0 128:64.0 129:1372.0 130:3055.0 131:1659.0 132:232.0 133:2893.0 134:460.0 135:237.0 136:30.0 141:29.0 143:619.0 144:80.0 145:104.0 147:16627.0 148:2848.0 149:2024.0 152:34.0 157:244.…	9982	13071	6850	5875	7579	18257	8138	2896	16318	5958	4330	4849	8539	9048	11842	3323	14294	16512	17505	12761	4367	5782	7316	3234	2970	8394	12511	2867	18372	6041	7336	14485	9531	6783	10629	18826	7877	7921	14436	8234	4015
37	threitol	identified compound	UNXHWFMMPAWVPI-QWWZWVQMSA-N	169019	467595	217	770	85:123.0 86:39.0 87:235.0 88:92.0 89:794.0 91:41.0 92:65.0 93:48.0 94:22.0 97:38.0 101:1040.0 102:87.0 103:5119.0 104:409.0 105:302.0 106:38.0 112:26.0 113:47.0 114:17.0 115:225.0 116:875.0 117:3651.0 118:353.0 119:290.0 129:736.0 131:620.0 132:62.0 133:1389.0 134:137.0 135:41.0 143:141.0 145:31.0 147:6122.0 148:886.0 149:553.0 151:42.0 165:22.0 175:40.0 189:971.0 190:191.0 191:521.0 192:94.0 193…	2546	3201	2658	925	1279	1921	1741	1897	1778	1610	2578	2573	1712	2229	2746	2671	1604	2063	2600	1649	1530	1384	2711	2269	3690	2746	3795	3317	710	1518	2622	2424	2247	1820	2764	4040	1894	2773	3235	1615	3572
39	sucrose	identified compound	CZMRCDWAGMRECN-UGDNZRGBSA-N	5988	916229	271	34176	85:23797.0 86:3499.0 87:23892.0 88:12950.0 89:58321.0 90:5727.0 91:5072.0 92:769.0 93:1945.0 94:1780.0 95:5674.0 96:847.0 97:15080.0 98:3953.0 99:26594.0 100:3626.0 101:68237.0 102:31677.0 103:932335.0 104:85404.0 105:39516.0 106:2237.0 107:1067.0 108:731.0 109:55123.0 110:3888.0 111:24964.0 112:3934.0 113:41505.0 114:9666.0 115:31782.0 116:33587.0 117:219840.0 118:23267.0 119:27738.0 120:2710.0 …	813	1375	1804	490	542	155	574	453	107	421	403	1015	183	856	1113	992	410	842	585	448	449	781	749	562	1529	1056	1268	1641	380	1499	1042	1015	3011	648	626	634	837	1134	1536	170	4095
40	succinic acid	identified compound	KDYFGRWQOYBRFD-UHFFFAOYSA-N	1110	370737	247	34190	85:303.0 87:764.0 88:359.0 89:340.0 91:55.0 92:42.0 95:84.0 98:86.0 99:324.0 101:577.0 102:330.0 103:701.0 104:172.0 105:342.0 106:78.0 107:93.0 111:30.0 113:629.0 114:213.0 115:891.0 116:1231.0 117:1124.0 118:170.0 119:320.0 120:104.0 124:22.0 126:77.0 128:196.0 129:6064.0 130:1045.0 131:1466.0 132:345.0 133:2204.0 135:234.0 136:65.0 137:16.0 138:15.0 142:39.0 143:223.0 145:378.0 147:57887.0 148…	5948	48395	7417	3715	4006	28627	3481	4597	3785	3944	5317	5525	5821	7605	10810	5427	4516	4802	5013	5560	4398	5039	5905	6466	6446	5700	66019	6922	5854	4916	5342	8798	6596	5756	5312	5825	5107	5344	13547	5819	7309
41	stearic acid	identified compound	QIQXTHQIDYTFRH-UHFFFAOYSA-N	5281	787622	117	13	85:4191.0 86:1569.0 87:1271.0 88:840.0 89:3341.0 90:339.0 91:1247.0 92:198.0 93:2558.0 94:311.0 95:7043.0 96:882.0 97:6832.0 98:5171.0 99:2925.0 100:405.0 101:1507.0 102:583.0 103:508.0 104:58.0 105:3188.0 106:306.0 107:1125.0 108:164.0 109:2130.0 110:377.0 111:3168.0 112:1361.0 113:512.0 114:158.0 115:1020.0 116:7267.0 117:126653.0 118:11937.0 119:4908.0 120:246.0 121:958.0 122:149.0 123:575.0 1…	695758	430057	372331	263773	299237	399178	358745	326538	268996	317691	374395	251022	318837	501176	307866	390334	333806	296272	441034	772008	348904	333977	411861	419987	359499	394387	363306	347613	338392	588235	368632	397874	333442	305333	381478	600642	350646	491764	441793	409869	422257
43	shikimic acid	identified compound	JXOHGGNKMLTUBP-HSUXUTPPSA-N	8742	611100	204	286	85:149.0 87:51.0 89:152.0 90:30.0 91:290.0 92:189.0 93:498.0 94:99.0 95:323.0 96:150.0 97:191.0 98:58.0 99:248.0 100:45.0 101:676.0 103:796.0 104:122.0 105:435.0 107:157.0 108:97.0 109:114.0 111:293.0 112:57.0 113:62.0 114:60.0 115:150.0 116:435.0 117:504.0 118:76.0 119:240.0 121:261.0 122:62.0 123:242.0 125:205.0 126:81.0 128:58.0 131:777.0 132:71.0 133:2652.0 134:351.0 135:280.0 137:3.0 138:27.…	53080	8474	16363	16520	18154	8758	90290	13350	16363	14931	16325	9928	13462	49111	22409	8559	10652	13927	17602	23337	10773	7953	22759	13107	25132	52115	23529	9826	17530	23507	15397	17850	17781	14731	21960	58381	16137	56374	22475	27345	6761
46	serine	identified compound	MTCFGRXMJLQNBG-REOHCLBHSA-N	5951	392937	204	191798	85 93.0 86 262.0 87 68.0 88 216.0 89 240.0 90 35.0 91 24.0 92 7.0 95 11.0 98 47.0 99 18.0 100 3306.0 101 500.0 102 237.0 103 647.0 104 36.0 105 74.0 106 25.0 107 78.0 108 4.0 110 4.0 113 28.0 114 368.0 115 204.0 116 1011.0 117 480.0 118 102.0 119 95.0 120 19.0 121 10.0 126 13.0 127 121.0 128 39.0 129 20.0 130 282.0 131 359.0 132 458.0 133 827.0 134 238.0 135 62.0 136 4.0 137 11.0 138 3.0 139 3.0 …	145545	175847	60292	25555	48176	40648	50131	47010	30486	56506	56499	32719	65793	56423	47567	51895	33777	39647	51275	55540	28514	132080	40161	57569	42480	108609	52067	77610	173944	68810	41787	88034	54751	52865	39031	67337	55534	41036	66650	71183	87242
47	serine 2TMS	identified compound	MTCFGRXMJLQNBG-REOHCLBHSA-N	5951	338883	116	34166	86:2003.0 87:537.0 90:602.0 91:593.0 95:111.0 98:647.0 100:5523.0 101:595.0 102:2905.0 103:9760.0 106:235.0 109:119.0 115:988.0 116:43293.0 117:2849.0 118:2485.0 122:96.0 130:2377.0 131:2301.0 133:4061.0 138:36.0 142:179.0 146:3093.0 147:8991.0 148:1062.0 149:691.0 157:264.0 159:2108.0 160:338.0 161:143.0 170:39.0 174:204.0 175:118.0 177:74.0 203:21.0 207:107.0 217:186.0 218:216.0 219:211.0 221:1…	72772	140468	197422	92054	178861	145299	182412	174339	109095	167876	187359	111614	228267	166759	177424	164877	126930	155782	179593	139940	108139	85043	122829	167785	149434	71994	172420	269305	94466	189819	128379	216356	165850	160076	121479	213401	177427	129475	191545	223994	238061
48	salicylic acid	identified compound	YGSDEFSMJLZEOE-UHFFFAOYSA-N	338	480699	267	3063	85:285.0 86:220.0 87:2.0 89:1006.0 90:498.0 91:4530.0 92:934.0 93:295.0 94:14.0 95:336.0 96:295.0 98:121.0 99:41.0 100:8.0 102:149.0 103:549.0 104:235.0 105:892.0 106:168.0 107:90.0 108:111.0 109:204.0 111:75.0 112:87.0 115:867.0 116:172.0 117:148.0 118:237.0 119:617.0 120:447.0 121:352.0 122:47.0 123:228.0 124:84.0 126:602.0 128:74.0 129:64.0 130:169.0 131:828.0 132:86.0 133:2119.0 134:461.0 135…	18498	1462	16819	3401	706	25665	695	456	583	877	617	119373	573	13495	852	37256	449	432	536	760	924	15543	1272	4878	654	14896	1879	1445	580	1638	412	389	586	1156	309	499	444	12762	1195	620	848
49	ribose	identified compound	SRBFZHDQGSBBOR-SOOFDHNKSA-N	10975657	553078	217	125857	85:8071.0 86:9472.0 87:11706.0 88:7002.0 89:91105.0 90:8121.0 91:4369.0 92:716.0 93:150.0 94:1908.0 95:1008.0 96:977.0 97:1171.0 98:3992.0 99:8420.0 100:38767.0 101:35431.0 102:21246.0 103:1062555.0 104:101843.0 105:73545.0 106:4592.0 107:540.0 108:433.0 109:560.0 110:342.0 111:3649.0 112:4750.0 113:10117.0 114:23592.0 115:17668.0 116:13805.0 117:109230.0 118:11975.0 119:17425.0 120:1771.0 121:10…	5102	7825	7878	3968	4595	4149	6113	3673	4342	3741	4454	4081	3987	3902	5513	3459	3414	3811	4312	5121	3439	4552	4266	4649	5305	3791	5488	278	5233	4407	4171	4786	3890	3437	4286	5324	3986	3047	5771	4900	4139
50	ribonic acid	identified compound	QXKAIJAYHKCRRA-BXXZVTAOSA-N	5460677	599680	292	1683	85:227.0 86:88.0 87:301.0 88:189.0 89:1714.0 90:165.0 92:75.0 93:53.0 98:147.0 99:481.0 100:3713.0 101:2153.0 102:4583.0 103:29677.0 104:2992.0 105:1403.0 110:143.0 111:44.0 112:63.0 113:396.0 114:93.0 115:933.0 116:854.0 117:9305.0 118:835.0 119:929.0 120:54.0 121:81.0 123:25.0 124:12.0 125:90.0 126:47.0 127:17.0 128:340.0 129:5571.0 130:3345.0 131:4080.0 132:826.0 133:8223.0 134:602.0 135:562.0…	2408	4010	6350	1707	1813	2222	2352	1879	1916	1876	2321	2924	2424	2145	3379	2195	1733	2335	2869	2672	2392	2558	2164	2603	3688	2199	3214	3063	2582	3092	2215	2645	2767	1864	2782	3842	2106	2035	4645	2556	2944
51	ribitol	identified compound	HEBKCHPVOIAQTA-NGQZWQHPSA-N	6912	578867	319	66947	85:248.0 86:43.0 87:65.0 88:62.0 89:897.0 90:98.0 92:20.0 95:22.0 99:113.0 100:224.0 101:774.0 102:28.0 103:6316.0 104:624.0 105:415.0 107:35.0 109:433.0 110:374.0 111:71.0 112:1.0 113:273.0 114:80.0 115:19.0 116:274.0 117:7478.0 118:701.0 119:297.0 126:2.0 128:44.0 129:3713.0 130:874.0 131:1633.0 132:149.0 133:1838.0 134:180.0 135:129.0 136:1.0 140:1.0 142:152.0 143:478.0 145:98.0 146:11.0 147:7…	543	236	1249	170	119	506	716	149	116	160	113	1124	100	107	112	124	933	160	159	142	126	219	156	131	2078	422	145	92	256	154	170	93	176	794	953	192	129	838	106	121	95
52	quinic acid	identified compound	AAWZDTNXLSGCEK-LNVDRNJUSA-N	6508	637148	345	47249	85:2409.0 86:555.0 87:2017.0 88:587.0 89:1610.0 90:40.0 91:3677.0 92:677.0 93:3206.0 94:756.0 95:2018.0 96:319.0 97:1896.0 98:778.0 99:3313.0 100:594.0 101:8629.0 102:1689.0 103:10852.0 104:1036.0 105:3199.0 106:542.0 107:799.0 108:50.0 109:1347.0 110:285.0 111:2354.0 112:514.0 113:2216.0 114:444.0 115:14476.0 116:5495.0 117:9742.0 118:1360.0 119:4015.0 120:771.0 121:1528.0 122:198.0 123:731.0 12…	184	1075	2187	122	4055	1553	161	156	126	182	167	114	2513	202	812	4144	137	204	525	243	104	120	3558	149	3622	144	365	1910	106	1299	114	3305	111	238	7466	1383	2040	192	278	150	236
53	pyruvic acid	identified compound	LCTONWCANYUPML-UHFFFAOYSA-N	1060	211003	174	66	86:84.0 89:7609.0 90:671.0 91:90.0 98:6.0 99:2390.0 100:1953.0 101:104.0 110:81.0 114:306.0 115:3591.0 116:333.0 117:2148.0 118:94.0 130:355.0 136:66.0 143:134.0 144:3.0 148:23.0 158:709.0 159:180.0 160:5.0 173:5.0 174:9542.0 175:1130.0 176:403.0 184:60.0 189:139.0 191:166.0 199:33.0 208:6.0 209:2.0 210:1.0 228:22.0 247:1.0 251:9.0 296:2.0 297:1.0 318:6.0 322:9.0 425:10.0	na	na	na	na	na	na	na	na	na	na	na	na	na	na	na	na	na	na	na	na	na	na	na	na	na	na	na	na	na	na	na	na	na	na	na	na	na	na	na	na	na
54	pyrrole-2-carboxylic acid	identified compound	WRHZVMBBRYBTKZ-UHFFFAOYSA-N	12473	394886	240	483	85 197.0 86 123.0 87 373.0 88 254.0 92 277.0 93 53.0 94 332.0 96 322.0 98 159.0 99 30.0 101 198.0 102 209.0 105 114.0 106 250.0 107 47.0 108 1034.0 109 208.0 110 50.0 111 112.0 113 272.0 114 245.0 117 297.0 118 440.0 119 305.0 120 140.0 121 17.0 122 88.0 123 107.0 124 325.0 125 87.0 126 128.0 128 224.0 131 462.0 132 437.0 134 339.0 135 95.0 136 231.0 137 168.0 142 216.0 143 18.0 144 112.0 145 145…	1436	1437	793	837	1076	785	1284	1102	1357	1197	1449	1376	1457	1915	1981	1741	1711	2012	1871	2867	2325	2820	2375	2629	3064	3928	3303	2860	4486	3330	4870	3796	3430	3349	4230	5116	4211	4051	4389	5871	4934
55	pseudo-uridine	identified compound	PTJWIQPHWPFNBW-GBNDHIKLSA-N	15047	815904	217	47203	86:237.0 88:11.0 89:59.0 98:89.0 99:253.0 100:1259.0 101:467.0 102:246.0 103:1528.0 104:31.0 105:44.0 106:207.0 107:166.0 109:7.0 110:112.0 111:375.0 113:146.0 114:80.0 115:64.0 116:328.0 117:474.0 118:55.0 122:3.0 124:1.0 125:164.0 127:342.0 128:214.0 129:1201.0 130:286.0 131:481.0 132:107.0 133:1244.0 134:252.0 136:17.0 137:5.0 140:118.0 141:89.0 142:644.0 143:887.0 144:172.0 145:62.0 147:4539.…	10568	8668	9160	4442	7525	9356	8274	6319	7716	6547	9408	6900	10400	10287	8113	7190	6796	8531	9587	14156	5713	6785	8306	8520	12098	10665	8267	9057	8567	10171	6541	10553	6371	6793	9732	10567	6355	10355	10740	10381	11913
57	proline	identified compound	ONIBWKKTOPOVIA-BYPYZUCNSA-N	145742	366784	142	68068	85:1055.0 86:1908.0 87:916.0 88:634.0 95:165.0 96:356.0 97:345.0 99:1005.0 100:3118.0 101:1393.0 103:251.0 106:185.0 107:211.0 108:134.0 113:1037.0 114:294.0 115:1417.0 118:96.0 121:64.0 126:275.0 128:58.0 131:365.0 133:1875.0 140:1177.0 142:96461.0 143:13706.0 144:4081.0 145:234.0 147:1734.0 148:505.0 155:204.0 170:1119.0 174:120.0 175:34.0 176:111.0 181:141.0 184:74.0 196:36.0 204:70.0 215:33.0…	524202	744174	373480	183208	208715	143449	213572	184365	106054	156177	242381	188464	211469	232956	237517	224574	159786	180248	244088	325043	170405	399041	227220	256926	312633	308794	218065	158362	483144	348738	328233	207312	179287	209174	170789	192851	282635	113972	227319	474805	295188
58	piperidone	identified compound	XUWHAWMETYGRKB-UHFFFAOYSA-N	12665	275603	156	34023	85 313.0 86 2133.0 87 100.0 89 10.0 91 1.0 92 54.0 93 54.0 94 68.0 95 129.0 97 4.0 98 339.0 99 78.0 100 2441.0 101 229.0 102 141.0 103 160.0 104 41.0 105 172.0 106 216.0 107 648.0 109 93.0 110 545.0 111 5.0 112 96.0 113 22.0 114 137.0 115 193.0 116 188.0 117 101.0 118 56.0 119 47.0 122 30.0 126 693.0 127 556.0 128 915.0 129 179.0 130 428.0 131 73.0 133 135.0 134 199.0 135 185.0 136 25.0 137 5.0 1…	2039	2008	418	313	241	300	1112	458	271	376	340	284	289	534	309	3757	444	246	171	457	272	1284	222	355	187	1460	777	174	1541	372	251	3038	583	261	216	227	332	633	835	1024	738
59	pipecolinic acid	identified compound	HXEACLLIILLPRG-UHFFFAOYSA-N	25200477	404121	156	2448	85 187.0 88 116.0 99 41.0 100 66.0 101 16.0 103 96.0 109 24.0 110 3.0 113 34.0 114 48.0 116 62.0 117 22.0 126 6.0 127 56.0 128 38.0 130 33.0 134 136.0 147 48.0 151 152.0 152 36.0 156 4170.0 157 475.0 158 163.0 168 30.0 171 57.0 181 23.0 184 125.0 186 10.0 193 50.0 216 8.0 227 24.0 230 88.0 231 22.0 299 135.0 300 78.0 304 20.0 318 8.0 363 26.0 391 1.0 400 3.0 407 6.0 410 5.0 435 5.0 467 3.0 487 21…	3422	1358	927	329	545	379	1292	1477	493	466	388	477	668	863	669	439	295	339	484	814	1132	756	410	475	516	1608	701	402	4873	756	741	705	736	526	699	722	465	692	631	1483	866
60	phthalic acid	identified compound	XNGIFLGASWRNHJ-UHFFFAOYSA-N	1017	567345	147	46142	85:1488.0 86:188.0 87:617.0 88:207.0 89:2382.0 90:1115.0 91:3962.0 92:168.0 93:1678.0 94:146.0 95:203.0 96:81.0 97:59.0 99:223.0 100:235.0 101:559.0 102:405.0 103:2021.0 104:2900.0 105:3735.0 106:343.0 107:433.0 109:43.0 110:114.0 112:86.0 113:102.0 114:58.0 115:1691.0 116:305.0 117:184.0 118:551.0 119:5043.0 120:785.0 121:597.0 122:83.0 123:50.0 124:7.0 126:880.0 127:441.0 128:199.0 129:554.0 13…	8997	82231	6179	6355	9304	38785	7773	9230	5377	25315	6207	7018	29917	7586	70701	25972	6402	8464	7426	12445	26514	5225	4471	14810	8353	7319	114175	7015	8086	4791	4574	8372	6724	29539	10724	8197	6396	19015	67087	6508	4430
61	phosphoethanolamine	identified compound	SUHOOTKUPISOBE-UHFFFAOYSA-N	1015	603912	299	1723	85:20.0 86:924.0 87:173.0 88:41.0 90:8.0 91:76.0 95:36.0 96:1.0 97:39.0 99:9.0 100:4477.0 101:327.0 102:26.0 107:64.0 109:53.0 113:35.0 114:2019.0 115:1275.0 116:271.0 117:260.0 119:44.0 120:5.0 123:18.0 129:2.0 130:467.0 131:202.0 132:82.0 133:763.0 134:65.0 135:351.0 136:14.0 137:122.0 140:1.0 143:21.0 144:14.0 146:1.0 147:618.0 148:30.0 151:53.0 158:77.0 160:1.0 161:3.0 162:9.0 163:5.0 164:2.0…	400	551	244	234	454	433	658	314	665	800	856	629	956	521	461	587	850	837	771	708	306	353	578	268	586	655	519	622	769	803	571	706	398	709	498	780	890	576	633	246	592
62	phosphate	identified compound	NBIIXXVUZAFLBC-UHFFFAOYSA-K	1061	364057	314	33982	85 876.0 86 2390.0 87 1750.0 88 1780.0 89 4084.0 90 1290.0 91 2719.0 92 1111.0 93 261.0 94 354.0 95 23.0 96 836.0 98 2208.0 99 5577.0 101 1578.0 102 1106.0 103 19539.0 104 4863.0 105 11563.0 106 587.0 107 2201.0 108 360.0 109 835.0 110 407.0 111 116.0 112 1741.0 113 955.0 114 1586.0 115 33691.0 117 8642.0 118 6010.0 119 9620.0 120 2052.0 121 6803.0 122 907.0 123 3013.0 124 648.0 125 750.0 126 21.…	148	257080	115	155362	179132	245710	157492	189686	161040	205879	227402	194279	198923	36501	184073	232460	182774	204689	225446	255712	158025	182085	179056	143485	171909	29054	215621	165647	160987	189893	143296	221950	170481	179986	180994	252796	159218	27494	223680	148611	236215
65	phenylalanine 1TMS	identified compound	COLNVLDHVKWLRT-QMMMGPOBSA-N	6140	502796	120	59034	86:1339.0 87:2713.0 88:516.0 89:2231.0 90:1044.0 91:23505.0 92:3310.0 93:2428.0 94:249.0 95:24.0 101:207.0 102:1679.0 103:8284.0 104:1633.0 105:299.0 106:10.0 114:202.0 116:317.0 117:793.0 118:3404.0 119:2027.0 120:52751.0 121:4870.0 122:245.0 130:11435.0 131:2498.0 132:340.0 133:57.0 137:19.0 146:19892.0 147:2128.0 148:795.0 149:2.0 160:141.0 161:196.0 162:54.0 163:56.0 165:4.0 167:5.0 168:132.0…	23444	25909	44730	24944	43702	52163	42292	44847	34406	49169	64851	43430	46522	54282	46759	59898	41295	53173	55996	121830	39826	25269	67608	54017	61206	18491	49618	27157	19110	84485	32275	38482	31787	44845	38086	59244	58491	42045	59213	47480	87358
66	phenylalanine	identified compound	COLNVLDHVKWLRT-QMMMGPOBSA-N	6140	534825	192	390389	85:116.0 86:960.0 87:386.0 88:130.0 89:524.0 90:333.0 91:7394.0 92:957.0 93:245.0 95:80.0 97:48.0 98:130.0 99:52.0 100:9746.0 101:1177.0 102:805.0 103:1034.0 104:243.0 105:388.0 107:71.0 113:39.0 114:39.0 115:219.0 116:165.0 117:780.0 118:464.0 119:424.0 120:416.0 121:430.0 122:59.0 123:39.0 129:97.0 130:1679.0 131:1133.0 132:1341.0 133:1146.0 134:336.0 135:293.0 136:49.0 138:34.0 139:49.0 140:25…	67426	62107	39592	25473	35552	37422	45574	33459	31837	34401	44785	34012	42442	42449	28075	33763	36007	39572	46335	95872	29511	49106	47134	45438	59339	53004	31844	34319	54636	56661	44082	38427	24642	34964	35407	53034	52534	29870	35898	43577	41671
67	phenol	identified compound	ISWSIDIOOBJBQZ-UHFFFAOYSA-N	20488062	218927	151	31889	91:2045.0 92:161.0 93:334.0 94:209.0 95:2491.0 96:415.0 97:231.0 105:135.0 106:56.0 110:100.0 111:75.0 112:21.0 120:80.0 121:643.0 122:37.0 123:637.0 124:89.0 125:41.0 131:307.0 132:52.0 134:140.0 135:1287.0 136:193.0 137:125.0 145:37.0 149:73.0 150:28.0 151:15374.0 152:2150.0 153:646.0 154:68.0 166:3125.0 167:465.0 168:102.0 170:10.0 174:109.0 189:40.0 246:20.0 287:37.0 300:22.0 317:16.0 324:18.…	4065	14115	13816	5541	9258	5078	4796	3585	4899	4949	5049	3476	3805	6164	na	5161	4039	3407	5719	8170	4301	6174	6812	7490	4146	7340	11427	4162	5080	6695	6374	10265	6323	9124	28245	9295	4833	6619	30211	1325	11438
68	pentose	identified compound	PYMYPHUHKUWMLA-UHFFFAOYSA-N	854	540818	103	360841	86 84.0 87 151.0 88 150.0 89 2738.0 90 255.0 91 147.0 100 725.0 101 866.0 102 397.0 103 16183.0 104 1583.0 105 958.0 112 39.0 113 133.0 114 181.0 115 222.0 116 195.0 117 2331.0 118 244.0 119 285.0 120 38.0 127 111.0 128 36.0 129 1766.0 130 290.0 131 842.0 132 128.0 133 1834.0 134 293.0 135 187.0 138 20.0 142 84.0 143 261.0 144 52.0 145 129.0 146 52.0 147 5147.0 148 807.0 149 544.0 157 106.0 158 8…	1640	7771	20639	3284	4048	3264	3722	3445	3311	3966	3819	5137	3375	3616	1077	3175	3573	1281	3791	4053	5443	4626	4424	4825	5740	1352	6209	2432	4790	4579	4162	4650	4227	4028	4524	4649	3832	3141	5623	4854	4165
69	pelargonic acid	identified compound	FBUKVWPVBMHYJY-UHFFFAOYSA-N	8158	399229	215	50	85:95.0 86:236.0 88:109.0 89:242.0 90:68.0 94:18.0 95:61.0 96:43.0 98:137.0 99:208.0 101:214.0 102:71.0 105:367.0 116:364.0 117:7457.0 118:623.0 119:191.0 123:20.0 128:63.0 129:2753.0 130:235.0 131:2172.0 132:1576.0 133:343.0 143:171.0 144:20.0 145:577.0 146:129.0 149:75.0 150:22.0 157:39.0 159:78.0 171:92.0 172:28.0 187:106.0 201:79.0 215:2429.0 216:383.0 217:112.0 221:143.0 222:38.0 252:13.0 25…	16033	16814	10400	9401	16616	8243	12942	10837	12962	12145	13167	14390	9624	9241	17517	12932	11511	8084	13513	17397	23835	7593	9106	20056	25767	6798	17132	10030	14060	9891	13885	11171	17715	8410	7159	13447	11774	15935	20368	17714	8567
71	parabanic acid	identified compound	ZFLIKDUSUDBGCD-UHFFFAOYSA-N	67126	464991	100	4944	86:184.0 100:2598.0 101:191.0 102:43.0 107:53.0 110:113.0 132:10.0 180:10.0 184:81.0 185:1.0 215:53.0 216:3.0 243:231.0 258:5.0 312:3.0 349:7.0 360:7.0 402:7.0 409:10.0 429:9.0 433:1.0 447:3.0 480:21.0 483:7.0 496:10.0	6013	3566	1827	1874	1258	1667	4936	4501	3258	4409	5141	3630	3319	4758	4460	4449	4865	5996	5744	9111	6155	6525	6006	6877	3327	7994	8445	7417	9641	8196	9650	10160	7823	7453	10550	15909	9504	12270	12209	10918	12914
72	palmitoleic acid	identified compound	SECPZKHBENQXJG-FPLPWBNLSA-N	445638	706259	311	391898	85:405.0 86:127.0 87:100.0 88:106.0 89:342.0 90:32.0 91:410.0 92:134.0 93:696.0 94:296.0 95:1599.0 96:1826.0 97:1110.0 98:1428.0 99:386.0 100:76.0 101:299.0 102:133.0 105:458.0 107:371.0 108:267.0 109:604.0 110:792.0 111:403.0 112:293.0 113:104.0 114:41.0 115:49.0 116:721.0 117:8045.0 118:759.0 119:439.0 120:82.0 121:328.0 123:517.0 124:259.0 125:141.0 129:6070.0 130:660.0 131:1353.0 132:963.0 13…	1288	765	1022	870	2599	1323	2389	1103	1259	1460	345	333	2146	1417	681	564	973	1028	1196	1268	861	763	278	227	511	1348	687	193	400	1063	551	2480	388	691	653	2613	354	1314	858	492	447
73	palmitic acid	identified compound	IPCSVZSSVZVIGE-UHFFFAOYSA-N	985	710061	313	34071	85:5547.0 86:2174.0 87:1945.0 88:1374.0 89:4967.0 90:773.0 91:1518.0 92:318.0 93:3798.0 94:511.0 95:10592.0 96:1486.0 97:8747.0 98:6953.0 99:4528.0 100:714.0 101:2700.0 102:872.0 103:543.0 105:5528.0 106:406.0 107:1555.0 108:180.0 109:2908.0 110:516.0 111:3724.0 112:1696.0 113:834.0 114:115.0 115:1629.0 116:11477.0 117:187825.0 118:18078.0 119:7322.0 120:225.0 121:1203.0 122:69.0 123:876.0 124:28…	130537	96660	80721	59850	76208	92826	101773	76147	70510	76613	80380	53501	83648	104007	79426	84985	70813	74607	102189	150196	72420	71318	82722	84223	72248	81482	92347	69477	71678	124990	75700	97173	72442	72913	84387	138058	77905	96007	98049	89674	88137
70	p-cresol	identified compound	IWDCLRJOBJJRNH-UHFFFAOYSA-N	2879	280360	165	16321	85 286.0 86 127.0 89 1119.0 90 283.0 91 12035.0 92 977.0 93 220.0 95 661.0 97 48.0 100 35.0 101 41.0 102 3.0 103 566.0 104 194.0 105 1358.0 106 129.0 107 939.0 108 174.0 109 1304.0 110 198.0 111 8.0 116 61.0 119 166.0 120 79.0 121 303.0 122 20.0 123 105.0 127 98.0 130 438.0 131 212.0 132 26.0 133 15.0 134 340.0 135 3194.0 136 474.0 137 541.0 138 60.0 145 240.0 146 84.0 147 687.0 148 91.0 149 1552…	10089	7420	14686	11199	3093	4051	8304	5478	7980	8213	13502	8051	12800	11028	9838	14284	13304	8083	7365	6788	9657	5303	5770	10717	5388	8728	9136	26942	8268	10668	5684	6218	10633	9400	7221	13034	6458	12242	10176	9287	12960
75	oxoproline	identified compound	ODHCTXKNWHHXJC-VKHMYHEASA-N	7405	485935	156	10	85:3305.0 86:3646.0 88:224.0 89:349.0 92:90.0 93:31.0 94:268.0 97:300.0 98:1005.0 99:1224.0 100:2213.0 101:88.0 102:773.0 103:769.0 104:198.0 105:507.0 106:72.0 108:279.0 109:95.0 110:674.0 111:220.0 112:3321.0 113:1081.0 114:1752.0 115:792.0 116:101.0 117:1281.0 118:207.0 119:332.0 122:383.0 123:65.0 124:48.0 126:536.0 127:49.0 128:356.0 129:115.0 130:114.0 131:2158.0 132:618.0 133:4526.0 134:75…	306408	402267	310037	187624	231467	256328	219276	276287	234569	274524	338372	297707	318054	295107	376477	187770	227097	260227	311406	258884	174507	222063	306408	322516	205193	247127	399555	281910	347972	283291	229696	313763	331831	278345	338319	424595	360662	251330	424195	369550	345720
76	oxamic acid	identified compound	SOWBFZRMHSNYGE-UHFFFAOYSA-N	974	338255	190	87881	85:606.0 86:753.0 87:892.0 94:55.0 100:1553.0 101:469.0 102:530.0 103:2060.0 104:371.0 108:185.0 113:200.0 116:2745.0 117:1401.0 118:954.0 119:274.0 129:85.0 131:3009.0 133:1572.0 141:68.0 143:295.0 147:26249.0 148:3804.0 149:1555.0 158:245.0 165:143.0 168:50.0 169:38.0 174:310.0 175:300.0 177:86.0 181:120.0 182:31.0 188:181.0 189:394.0 190:3512.0 191:592.0 192:168.0 195:103.0 218:1130.0 220:165.…	82972	8821	4226	4676	7065	7075	7339	9163	6832	7390	31861	8610	7476	10888	8555	9708	7780	520850	618513	11802	8502	9792	11862	12784	15839	10853	12159	10985	7561	14902	11150	13603	12438	10547	14777	18190	12316	13884	16205	13611	17496
77	oxalic acid	identified compound	MUBZPKHOEPUJKR-UHFFFAOYSA-N	18676629	260513	190	4923	85:642.0 86:564.0 88:852.0 89:2725.0 90:394.0 91:354.0 92:72.0 93:452.0 95:374.0 99:782.0 100:169.0 101:3135.0 102:7162.0 103:10813.0 104:1629.0 105:3087.0 106:416.0 107:839.0 108:169.0 109:471.0 110:173.0 111:137.0 113:787.0 114:94.0 115:3681.0 116:1325.0 117:6042.0 118:1002.0 119:1067.0 120:91.0 121:33.0 122:65.0 123:314.0 124:97.0 125:300.0 129:68.0 130:184.0 131:11895.0 132:2017.0 133:14362.0…	106608	120048	4387	63300	93527	104243	118420	136983	95363	131988	157009	129422	114681	166415	118873	156295	126116	148343	161955	232113	140988	166506	174012	237149	120569	186054	187024	159157	167903	218769	193821	217957	197984	175637	234502	320930	187474	250503	276678	228884	297396
78	orotic acid	identified compound	PXQPEWDEAKTCGB-UHFFFAOYSA-N	967	586317	254	18492	86:145.0 93:50.0 97:74.0 99:33.0 100:658.0 101:27.0 117:39.0 124:23.0 131:210.0 132:36.0 133:51.0 140:16.0 147:494.0 153:16.0 158:39.0 167:49.0 174:219.0 214:30.0 225:13.0 226:22.0 239:84.0 246:15.0 253:160.0 254:1313.0 255:366.0 256:147.0 257:19.0 269:169.0 270:80.0 271:22.0 282:29.0 298:15.0 313:14.0 328:15.0 336:13.0 356:52.0 357:395.0 358:187.0 359:82.0 360:19.0 371:27.0 372:28.0 397:15.0 400…	340	536	238	229	435	438	386	503	497	291	410	580	226	357	462	417	496	472	376	380	458	449	340	291	309	416	514	593	432	713	450	400	349	320	472	523	407	427	725	668	557
80	ornithine 4TMS	identified compound	AHLPHDHHMVZTML-BYPYZUCNSA-N	6262	619196	142	171971	85:723.0 86:2210.0 89:192.0 90:259.0 92:74.0 94:128.0 98:578.0 99:450.0 100:4187.0 101:103.0 102:1982.0 109:83.0 110:315.0 112:594.0 113:282.0 114:353.0 115:942.0 116:608.0 117:820.0 124:182.0 128:1141.0 130:499.0 131:1201.0 132:341.0 139:77.0 140:373.0 142:24823.0 143:2656.0 144:1067.0 147:2495.0 148:904.0 153:99.0 155:113.0 158:106.0 160:217.0 169:314.0 170:137.0 172:1044.0 173:40.0 174:7343.0 …	135271	149610	137977	56841	89828	71539	101040	91999	44404	96481	127045	106417	66676	105290	104388	69290	71536	139595	136117	87750	76542	102749	91210	99008	121190	125588	123247	103434	124864	117383	87796	122276	86446	67822	138717	270959	142873	91534	137470	148506	147525
81	ornithine 3TMS	identified compound	AHLPHDHHMVZTML-BYPYZUCNSA-N	6262	594878	174	46419	86:2512.0 87:360.0 90:9.0 94:31.0 97:64.0 98:210.0 100:1321.0 101:264.0 102:406.0 114:91.0 116:63.0 121:21.0 125:34.0 126:120.0 128:336.0 130:841.0 132:70.0 140:63.0 142:1152.0 143:341.0 144:214.0 145:68.0 146:367.0 149:149.0 150:37.0 154:124.0 158:97.0 159:55.0 161:28.0 164:28.0 169:30.0 171:51.0 172:213.0 173:64.0 174:5256.0 175:719.0 176:244.0 177:52.0 184:18.0 186:1225.0 187:241.0 188:102.0 1…	5479	7024	8200	4801	9418	8878	4112	10780	4875	9770	11468	10715	6714	9099	8689	10035	5080	11574	9938	10075	7303	6247	9060	7797	6226	6003	8089	6510	5322	11992	6302	10576	9187	7597	12943	13567	11198	10199	14551	12386	14278
82	oleic acid	identified compound	ZQPPMHVWECSIRJ-KTKRTIGZSA-N	445639	781527	339	1677	85 2028.0 86 501.0 87 461.0 88 450.0 89 1770.0 90 92.0 91 1724.0 92 699.0 93 3684.0 94 1752.0 95 9636.0 96 12465.0 97 7980.0 98 8467.0 99 2044.0 100 150.0 101 659.0 103 66.0 104 2.0 105 1947.0 106 375.0 107 2215.0 108 1397.0 109 5311.0 110 4593.0 111 3398.0 112 1687.0 113 484.0 115 472.0 116 3914.0 117 40886.0 118 4347.0 119 3142.0 120 338.0 121 1983.0 122 672.0 123 2961.0 124 1887.0 125 1309.0 1…	491	6286	1202	825	452	7658	1212	1068	579	929	948	699	1728	1272	5754	5465	787	971	9327	585	909	6300	2730	3650	3910	526	5784	3200	4585	876	3832	957	726	896	5706	2065	754	1037	6959	815	559
83	nicotinic acid	identified compound	PVNIIMVLHYAWGP-UHFFFAOYSA-N	938	353428	180	327312	85:19018.0 86:3339.0 90:88561.0 91:8298.0 92:6075.0 93:12160.0 94:8292.0 95:4960.0 96:5731.0 97:1868.0 98:2143.0 99:6104.0 104:1919.0 105:11104.0 106:1027060.0 107:76462.0 108:4911.0 109:12893.0 110:12042.0 111:2544.0 112:1008.0 113:1931.0 119:1112.0 120:17045.0 121:3311.0 122:14905.0 123:13783.0 124:2292.0 125:1080.0 126:1605.0 131:1316.0 132:1743.0 136:920400.0 137:120093.0 138:34850.0 139:2402…	8585	10526	2549	4498	6725	6639	9122	11080	6517	9682	11807	8828	7154	11510	10576	11861	8950	11369	11155	19394	13466	12123	11315	13013	7102	12383	16020	12978	15402	15533	17980	20725	14476	14064	18742	28913	17840	16664	24137	16890	26333
84	naproxen	identified compound	CMWTZPSULFXXJA-VIFPVBQESA-N	156391	737107	185	21504	85:269.0 86:227.0 87:83.0 88:226.0 89:312.0 91:239.0 94:54.0 98:147.0 99:208.0 100:40.0 101:141.0 102:216.0 103:171.0 104:77.0 106:66.0 107:37.0 110:50.0 111:85.0 113:175.0 114:312.0 115:2844.0 116:329.0 117:657.0 120:37.0 121:41.0 122:41.0 124:43.0 126:406.0 127:502.0 128:400.0 129:546.0 130:173.0 131:296.0 133:214.0 134:119.0 137:70.0 138:78.0 139:814.0 140:358.0 141:3444.0 142:1168.0 143:252.0…	10764	22354	5961	547	709	839	977	715	579	686	36253	769	877	11299	20612	734	15368	947	796	903	639	618	883	905	898	10757	20847	1004	730	1226	703	872	807	700	862	1879	1012	10361	23633	738	1007
85	N-acetylputrescine TMS2	identified compound	KLZGKIDSEJWEDW-UHFFFAOYSA-N	122356	595523	174	87301	85:3862.0 86:56152.0 87:6678.0 88:3311.0 89:518.0 90:72.0 93:1.0 94:49.0 95:146.0 96:2586.0 97:481.0 98:2104.0 99:2411.0 100:32618.0 101:5452.0 102:5394.0 103:1640.0 104:582.0 105:212.0 109:26.0 110:423.0 111:415.0 112:6397.0 113:2161.0 114:2504.0 115:2578.0 116:5494.0 117:3889.0 118:1034.0 119:497.0 120:23.0 122:1872.0 123:114.0 124:123.0 125:23.0 126:826.0 127:360.0 128:3154.0 129:1963.0 130:96…	5479	7024	4365	2385	9418	8878	2491	10780	4875	3927	14868	4324	3072	12005	10915	3245	2860	14570	5511	10075	7303	2537	3639	3662	3828	1868	3721	4181	2761	3222	3386	3927	2677	2939	4302	5601	4344	1601	3229	4697	4284
86	N-acetylornithine TMS2a	identified compound	JRLGPAXAGHMNOL-LURJTMIESA-N	439232	697086	174	4931	85 53.0 86 1195.0 87 33.0 89 479.0 90 19.0 100 875.0 101 89.0 103 402.0 104 45.0 113 18.0 114 86.0 116 326.0 117 134.0 118 19.0 128 7.0 129 239.0 130 144.0 131 78.0 133 165.0 139 11.0 143 12.0 144 137.0 147 173.0 157 36.0 158 37.0 160 95.0 161 4.0 170 9.0 172 32.0 173 19.0 174 3568.0 175 705.0 176 279.0 177 32.0 184 26.0 185 34.0 186 25.0 188 359.0 189 117.0 190 45.0 192 7.0 195 3.0 201 10.0 217 …	3528	3317	290	1080	2714	3764	3151	3596	3133	2982	4278	3462	2679	4499	3910	2122	3338	4808	5541	7123	2949	4442	3785	3775	779	5224	4258	3180	5090	4528	5146	4693	4359	3451	4651	5330	3660	4606	4512	5181	4146
87	myristic acid	identified compound	TUNFSRHWOTWDNC-UHFFFAOYSA-N	11005	634414	285	127	85:1672.0 86:922.0 87:259.0 88:617.0 89:2301.0 90:194.0 91:565.0 93:1089.0 94:262.0 95:2947.0 96:479.0 97:1977.0 98:1752.0 99:1650.0 100:382.0 101:1406.0 104:452.0 105:1305.0 106:321.0 107:394.0 108:204.0 109:725.0 110:354.0 111:699.0 112:710.0 116:3547.0 117:55137.0 118:5160.0 119:1775.0 120:155.0 121:314.0 122:68.0 123:74.0 124:132.0 125:204.0 128:186.0 129:23236.0 130:2963.0 131:10163.0 132:11…	7362	6136	4067	3297	4930	6124	4711	8006	5057	5053	4508	3614	4189	5632	6377	5748	4355	3789	5195	6714	3137	4441	3319	3777	2665	4465	7966	3279	3957	5961	3143	3957	4378	3736	3688	5011	4581	6630	4183	3621	2653
89	myo-inositol	identified compound	CDAISMWEOUEBRE-UHFFFAOYSA-N	892	730022	305	1741	85:113.0 86:491.0 87:31.0 88:19.0 89:298.0 90:43.0 95:6.0 99:170.0 100:411.0 101:320.0 102:164.0 103:3399.0 104:366.0 105:2.0 107:22.0 108:49.0 109:262.0 111:243.0 112:149.0 113:176.0 114:90.0 115:187.0 116:296.0 117:1042.0 118:228.0 119:212.0 121:1.0 123:6.0 124:38.0 125:22.0 126:73.0 127:67.0 128:163.0 129:4240.0 130:611.0 131:1566.0 132:262.0 133:3203.0 134:572.0 135:421.0 136:43.0 138:92.0 13…	51076	48070	58981	25059	50163	48316	54076	28784	43178	37566	64842	47911	51682	51545	43823	38940	41536	60516	68533	77963	29284	33510	56056	44569	92457	47572	44847	51211	68517	60973	43761	56517	40409	49036	64574	77216	37411	44925	50098	38741	45060
92	methionine	identified compound	FFEARJCKVFRZRR-BYPYZUCNSA-N	6137	484514	176	46165	85 18473.0 86 889.0 90 27.0 91 18.0 97 377.0 98 517.0 99 5164.0 100 659.0 111 1136.0 113 2776.0 125 136.0 126 641.0 127 1801.0 128 5306.0 129 570.0 130 419.0 141 647.0 144 42.0 153 79.0 155 848.0 160 116.0 164 5.0 169 237.0 176 4562.0 177 604.0 178 405.0 179 18.0 180 18.0 183 15.0 185 29.0 188 141.0 197 49.0 202 261.0 203 98.0 204 9.0 205 22.0 212 15.0 218 143.0 219 294.0 220 80.0 234 8.0 242 4.0…	33918	38677	8013	9747	9467	9692	13813	12025	8579	12769	14191	14355	13797	14443	12900	6357	9040	11476	14208	21797	8608	24450	13728	16271	19421	25623	11629	10700	34784	21983	15704	16057	11345	14124	11693	14313	24499	9678	13089	20519	14716
93	methionine sulfoxide 2	identified compound	QEFRNWWLZKMPFJ-ZXPFJRLXSA-N	10062737	605401	128	1689	85:190.0 86:166.0 87:115.0 88:218.0 89:228.0 90:246.0 91:507.0 93:268.0 95:100.0 96:21.0 97:18.0 98:97.0 99:117.0 100:2102.0 101:139.0 102:866.0 103:1736.0 104:167.0 107:262.0 109:20.0 112:159.0 113:5.0 114:774.0 115:220.0 116:152.0 117:80.0 118:107.0 119:358.0 120:67.0 121:90.0 123:130.0 124:16.0 125:4.0 128:17068.0 129:2443.0 130:1288.0 131:524.0 132:237.0 133:525.0 134:149.0 135:137.0 136:133.…	3116	2749	6654	1127	1373	1406	2400	1829	1388	1131	1962	1854	1918	2279	1949	1293	1458	2059	2141	2547	1511	2054	1713	2063	2814	2838	2752	2063	2914	3225	1512	1363	2286	1918	2415	3355	2876	1621	4073	3365	3376
94	methionine sulfoxide	identified compound	QEFRNWWLZKMPFJ-ZXPFJRLXSA-N	10062737	638357	128	56475	85:111.0 86:364.0 88:603.0 89:480.0 90:1509.0 91:197.0 92:84.0 93:154.0 95:15.0 97:671.0 98:290.0 99:172.0 100:3967.0 101:724.0 102:1925.0 103:992.0 104:302.0 105:398.0 108:181.0 110:1218.0 111:125.0 112:950.0 113:82.0 114:1237.0 115:308.0 116:243.0 117:622.0 118:349.0 119:370.0 120:31.0 126:441.0 127:60.0 128:36136.0 129:5558.0 130:2232.0 131:472.0 132:667.0 133:2030.0 134:1330.0 136:77.0 138:1.…	2806	7951	15269	1509	2798	1503	2830	3320	1793	3861	3909	3930	2681	3955	5923	3665	2396	3539	2965	4270	2237	3059	3871	3137	4470	3758	7457	3977	4493	5687	5183	4529	3884	3683	3316	6645	6064	4063	8853	5585	7968
95	methionine	identified compound	FFEARJCKVFRZRR-BYPYZUCNSA-N	6137	430778	104	299	85:444.0 86:538.0 87:1293.0 88:1506.0 89:78.0 90:76.0 91:388.0 94:28.0 98:134.0 99:252.0 100:225.0 102:430.0 103:672.0 104:19725.0 105:1094.0 106:503.0 109:56.0 112:50.0 114:462.0 115:157.0 116:2208.0 118:58.0 121:15.0 122:24.0 127:460.0 128:89.0 129:154.0 130:3896.0 131:3518.0 132:69.0 133:218.0 140:93.0 143:93.0 144:70.0 146:357.0 147:563.0 158:78.0 159:97.0 173:331.0 178:1359.0 179:96.0 188:15…	7460	10104	8532	11087	10703	15320	14064	17374	9232	14919	16884	15476	16551	16915	16517	11040	10121	13572	14906	18501	12209	7202	16698	16464	20116	6483	17303	12061	7940	23985	13415	15727	13987	15394	12690	17917	26656	13158	19099	21963	22438
96	melibiose	identified compound	DLRVVLDZNNYCBX-ABXHMFFYSA-N	440658	988497	361	4730	87:30.0 88:14.0 89:775.0 90:43.0 96:163.0 99:91.0 100:296.0 101:841.0 102:257.0 103:3880.0 104:223.0 105:205.0 109:146.0 113:136.0 114:48.0 116:215.0 117:1162.0 118:29.0 125:3.0 129:2842.0 130:613.0 131:483.0 133:1258.0 134:133.0 135:18.0 137:14.0 138:29.0 139:3.0 140:57.0 141:70.0 142:53.0 143:226.0 145:162.0 147:3683.0 148:373.0 149:291.0 150:67.0 153:61.0 154:4.0 155:526.0 156:117.0 157:540.0 …	1129	406	1927	566	540	654	1633	642	694	827	1153	945	568	1270	2127	412	460	1341	1130	1219	723	505	1012	494	1403	1245	1882	681	858	2096	781	1234	1066	756	850	2715	808	1919	2561	1048	1208
97	mannose	identified compound			643848	205	390222	85 1023.0 86 1367.0 87 1412.0 88 910.0 89 9966.0 90 944.0 91 1078.0 92 80.0 97 270.0 98 228.0 99 839.0 100 2042.0 101 3813.0 102 1799.0 103 22002.0 104 1959.0 105 5629.0 106 414.0 107 186.0 108 168.0 109 122.0 110 144.0 111 410.0 112 227.0 113 903.0 114 2051.0 115 1515.0 116 1545.0 117 17141.0 118 1619.0 119 1737.0 120 239.0 121 354.0 122 100.0 123 59.0 124 68.0 125 140.0 126 275.0 127 393.0 128 …	111583	100227	93828	77355	101721	73625	271460	98799	86898	102437	80822	83474	101468	101987	72168	64064	77933	75823	89499	121586	54768	62276	85360	94286	87077	88011	84457	83118	72851	99406	83562	126468	123225	89143	78077	167651	86689	84346	95252	184796	36594
98	maltotriose	identified compound	FYGDTMLNYKFZSV-PXXRMHSHSA-N	192826	1176044	361	84521	85 2289.0 86 1107.0 87 1856.0 88 1048.0 89 11031.0 90 1060.0 91 652.0 92 201.0 93 121.0 94 240.0 95 525.0 96 664.0 97 2907.0 98 443.0 99 1934.0 100 3182.0 101 6896.0 102 3193.0 103 45196.0 104 4117.0 105 5028.0 106 356.0 107 488.0 108 225.0 109 2412.0 110 402.0 111 1693.0 112 454.0 113 1828.0 114 1470.0 115 2305.0 116 3828.0 117 26968.0 118 2734.0 119 2261.0 120 199.0 121 186.0 122 101.0 123 327.…	421	117	146	762	1380	1052	977	427	492	1298	1358	425	723	545	155	185	589	714	442	488	476	156	130	651	114	93	104	591	896	1322	419	530	435	599	334	300	1235	139	66	76	115
99	maltose 2	identified compound	GUBGYTABKSRVRQ-ASMJPISFSA-N	439341	954710	204	3272	85:65.0 86:12.0 87:178.0 89:646.0 90:60.0 94:54.0 99:52.0 100:39.0 101:228.0 102:47.0 103:3362.0 104:248.0 105:182.0 109:87.0 111:1.0 112:1.0 113:106.0 114:133.0 115:106.0 116:132.0 117:1609.0 118:51.0 119:22.0 129:2127.0 130:222.0 131:640.0 133:703.0 135:19.0 141:2.0 142:71.0 143:382.0 144:13.0 147:3812.0 148:592.0 149:293.0 150:21.0 155:171.0 156:13.0 157:317.0 158:75.0 159:7.0 160:454.0 161:12…	468	992	5730	791	3013	2033	3405	2050	1286	725	2454	1557	1186	3886	3570	733	439	3605	446	2562	1549	1596	3005	1781	2376	917	2690	1507	1114	1337	2646	2989	2708	2203	2503	6723	2480	676	3244	3753	3434
100	maltose 1	identified compound	GUBGYTABKSRVRQ-ASMJPISFSA-N	439341	946601	204	1979	85:18.0 86:40.0 87:38.0 89:640.0 90:50.0 94:3.0 95:51.0 96:226.0 97:52.0 98:60.0 99:10.0 100:262.0 101:31.0 102:157.0 103:2571.0 104:171.0 105:231.0 108:7.0 109:86.0 111:17.0 112:13.0 113:130.0 114:62.0 116:82.0 117:1560.0 118:98.0 119:98.0 125:5.0 127:10.0 128:39.0 129:1849.0 130:331.0 131:223.0 132:24.0 133:813.0 134:81.0 140:25.0 141:77.0 142:107.0 143:428.0 145:58.0 147:3256.0 148:427.0 149:3…	5188	971	1945	5467	12924	10141	5527	495	2201	6653	9831	3679	5980	5347	1128	1462	3141	3320	3429	3909	1951	2157	2434	8702	4061	4568	533	7189	4884	8858	3837	4999	3639	3669	2573	2117	12428	4482	905	1510	1493
101	malic acid	identified compound	BJEPYKJPYRNKOW-UHFFFAOYSA-N	20130941	463180	233	1391	85:66.0 87:316.0 88:106.0 89:148.0 90:42.0 95:37.0 99:129.0 101:4462.0 102:488.0 103:641.0 104:93.0 105:294.0 115:533.0 116:432.0 117:2305.0 118:259.0 119:501.0 120:70.0 121:62.0 124:21.0 129:385.0 131:1945.0 132:129.0 133:6850.0 134:1075.0 135:667.0 136:51.0 137:33.0 139:20.0 142:41.0 143:745.0 144:107.0 145:145.0 147:21089.0 148:2969.0 149:2528.0 150:99.0 151:286.0 153:24.0 158:12.0 159:29.0 16…	2791	6771	1733	1161	1239	1872	1970	1590	1325	1760	2480	2801	2143	2486	5419	1831	1253	1684	1839	2806	1429	1475	2070	1886	3190	2334	6391	1839	1800	2776	1935	3380	5606	2387	2174	2526	2988	2272	6339	2646	4431
103	lysine	identified compound	KDXKERNSBIXSRK-YFKPBYRVSA-N	5962	663483	317	12	85:4786.0 86:50806.0 87:6485.0 88:21649.0 89:2723.0 90:1721.0 94:1142.0 95:795.0 96:535.0 97:1150.0 98:3651.0 99:2928.0 100:47572.0 101:7430.0 102:13074.0 103:4519.0 104:946.0 106:143.0 107:120.0 108:162.0 109:304.0 110:594.0 111:231.0 112:11763.0 113:2727.0 114:12616.0 115:16345.0 116:6882.0 117:4303.0 118:1926.0 119:1449.0 120:195.0 121:379.0 123:316.0 124:795.0 125:493.0 126:4338.0 127:1011.0 …	32134	42704	34926	18506	30364	38904	39838	32105	24608	38262	41635	38359	27947	39861	24941	22759	32755	46791	54049	54075	33185	47382	46519	39071	47863	48999	33637	35396	65505	49425	31010	56775	37183	36256	47275	62955	54996	35703	38457	57889	61563
104	linoleic acid	identified compound	OYHQOLUKZRVURQ-HZJYTTRNSA-N	5280450	777414	150	165	85:1534.0 86:470.0 87:386.0 88:244.0 89:1256.0 90:176.0 91:6885.0 92:1525.0 93:8654.0 94:6153.0 95:14372.0 96:7918.0 97:3896.0 98:518.0 99:829.0 100:115.0 101:441.0 102:166.0 103:421.0 104:436.0 105:2615.0 106:995.0 107:4482.0 108:3591.0 109:5935.0 110:3865.0 111:1556.0 112:178.0 113:194.0 115:385.0 116:1903.0 117:9875.0 118:1041.0 119:1844.0 120:836.0 121:4850.0 122:2280.0 123:2389.0 124:1664.0 …	3393	1700	1552	3732	4259	4373	6339	3997	7249	2695	2345	941	4899	3503	3535	3934	2325	3836	2829	5670	966	1716	3867	3282	985	2086	4092	3320	3982	2653	3108	4132	3418	1944	4627	3222	1564	2739	2389	1655	3838
105	levoglucosan	identified compound	TWNIBLMWSKIRAT-VFUOTHLCSA-N	2724705	569637	204	3169	85:775.0 87:165.0 88:163.0 89:177.0 90:42.0 91:21.0 92:2.0 95:13.0 97:132.0 98:53.0 99:731.0 100:180.0 101:2830.0 102:212.0 103:5456.0 104:270.0 105:366.0 109:317.0 111:424.0 112:33.0 113:818.0 114:131.0 115:724.0 116:1575.0 117:3643.0 118:337.0 119:568.0 120:38.0 125:69.0 126:44.0 127:263.0 129:5991.0 130:703.0 131:1830.0 132:221.0 133:3867.0 134:297.0 135:293.0 136:48.0 139:2.0 140:20.0 141:67.…	3472	2410	3445	1114	841	1231	1668	1277	2061	1005	1301	948	1458	2489	1614	1753	1389	1360	1500	3174	1246	7849	9080	6625	5823	2411	1789	5653	6082	2420	956	2739	1551	1159	7200	2017	1442	2696	2924	3194	7092
108	leucine 1TMS	identified compound	ROHFNLRQFUQHCH-YFKPBYRVSA-N	6106	280176	86	453	85:2866.0 86:48433.0 87:4176.0 89:655.0 91:1047.0 92:155.0 95:67.0 96:510.0 97:153.0 98:109.0 99:175.0 101:162.0 102:486.0 103:1914.0 104:760.0 105:393.0 106:217.0 114:153.0 116:224.0 118:384.0 121:58.0 126:283.0 128:481.0 129:854.0 130:913.0 131:625.0 132:367.0 142:316.0 144:105.0 146:2081.0 151:48.0 152:30.0 153:64.0 158:64.0 159:53.0 160:86.0 161:68.0 165:900.0 166:125.0 170:1061.0 171:585.0 1…	108679	148354	192778	163719	186612	171097	397225	182363	163534	187762	243299	229125	154736	211808	208138	165058	205379	258815	266352	273268	160496	96915	214079	251631	231465	111244	211671	151881	120560	355383	193817	161289	185322	172804	217097	296271	383925	172765	240176	229102	280285
109	leucine	identified compound	ROHFNLRQFUQHCH-YFKPBYRVSA-N	6106	346101	158	9	85:4635.0 86:3771.0 87:1723.0 88:653.0 90:216.0 92:322.0 93:257.0 94:240.0 95:264.0 96:604.0 97:648.0 98:1293.0 99:2270.0 100:16154.0 101:2483.0 102:35025.0 103:8176.0 104:1484.0 106:132.0 109:214.0 110:350.0 111:258.0 112:641.0 113:670.0 114:595.0 115:4531.0 116:6283.0 117:2966.0 118:912.0 119:1252.0 120:148.0 124:228.0 125:94.0 126:557.0 127:719.0 128:4500.0 129:1122.0 130:7269.0 131:3307.0 132…	438070	645352	196845	163594	207191	174140	392001	219749	167673	207009	391498	259950	179169	308009	223799	158938	216286	147129	393206	588325	176049	463292	319908	409752	275531	401796	237746	195928	607987	534164	252118	178192	213283	208078	350283	478150	523828	235681	274386	295143	357619
110	lauric acid	identified compound	POULHZVOKOAJMA-UHFFFAOYSA-N	3893	547840	117	14728	85:168.0 86:141.0 87:101.0 89:291.0 93:60.0 95:377.0 96:145.0 97:251.0 98:244.0 101:191.0 104:48.0 105:176.0 109:155.0 111:88.0 115:37.0 116:428.0 117:7512.0 118:665.0 119:226.0 120:42.0 122:42.0 129:2879.0 130:369.0 131:1222.0 132:1823.0 133:146.0 134:55.0 139:64.0 143:180.0 145:762.0 146:42.0 147:217.0 153:16.0 154:30.0 157:84.0 160:63.0 169:49.0 171:95.0 176:32.0 179:30.0 185:98.0 186:22.0 187…	112180	59482	8341	62626	89184	48362	42216	109004	53459	99992	68240	55807	8689	11832	122021	179979	77520	5940	76386	119029	10983	7238	6765	83454	9721	9347	51964	6614	56621	14622	54548	8069	51210	3112	8878	10062	72699	96676	40461	53285	5356
111	lactulose	identified compound	JCQLYHFGKNRPGE-FCVZTGTOSA-N	11333	929908	204	6432	85:15.0 86:83.0 89:320.0 93:71.0 96:35.0 99:179.0 100:35.0 101:517.0 103:2907.0 104:50.0 105:154.0 109:103.0 113:221.0 114:90.0 115:12.0 116:235.0 117:787.0 118:124.0 124:47.0 126:14.0 129:3378.0 130:406.0 131:445.0 133:426.0 134:88.0 136:23.0 137:31.0 139:22.0 141:191.0 143:655.0 144:48.0 145:261.0 147:4074.0 148:387.0 149:168.0 150:56.0 153:61.0 155:144.0 156:88.0 157:219.0 158:34.0 159:34.0 16…	746	2271	3740	526	1499	1272	2798	1589	1178	1354	2151	1289	1649	585	2848	2904	1348	696	2171	2488	2892	647	1819	1548	1993	1064	1927	1679	1488	2437	1653	1914	1960	1934	1133	2618	3844	893	2734	2126	55548
112	lactic acid	identified compound	JVTAAEKCZFNVCJ-UHFFFAOYSA-N	19789253	219848	191	46123	85:8684.0 86:6573.0 87:72227.0 88:111565.0 89:22391.0 90:1554.0 91:2622.0 92:778.0 93:502.0 94:4760.0 95:1164.0 96:739.0 97:892.0 98:246.0 99:4891.0 100:2372.0 101:61750.0 102:48891.0 103:46949.0 104:6822.0 105:17397.0 106:1817.0 107:2274.0 108:297.0 109:91.0 111:450.0 113:4576.0 114:1039.0 115:35415.0 116:15880.0 117:1091636.0 118:122979.0 119:56962.0 120:3499.0 121:613.0 126:206.0 127:1515.0 12…	137912	1287636	242408	192444	151404	288234	246762	96359	218203	207988	88385	203871	163675	443182	98616	784835	138817	209776	544551	372079	169237	64228	574307	110617	477696	301490	248820	290725	135015	1004412	241154	194377	477725	227223	419906	159763	259772	877227	2373719	185349	955214
114	kynurenine	identified compound	YGPSJZOEDVAXAB-UHFFFAOYSA-N	25245862	769709	218	210712	85 61.0 86 203.0 87 88.0 88 39.0 89 88.0 90 106.0 91 556.0 92 336.0 93 61.0 94 42.0 96 61.0 97 218.0 99 34.0 100 1226.0 101 176.0 102 110.0 103 521.0 104 98.0 105 223.0 106 72.0 111 32.0 114 277.0 115 249.0 116 161.0 117 190.0 118 1701.0 119 339.0 120 411.0 121 121.0 123 38.0 128 66.0 129 162.0 130 879.0 131 491.0 132 570.0 133 536.0 134 815.0 135 221.0 136 16.0 139 33.0 143 50.0 144 162.0 145 69…	1251	1058	975	642	1277	729	1074	874	726	756	1397	911	1485	1083	709	396	787	1690	1899	2320	691	1028	1265	1035	1970	1005	797	878	1056	1111	643	1439	582	832	962	1260	1232	794	1138	1089	1431
115	ketohexose	identified compound			627414	307	16813	86 98.0 89 2433.0 90 52.0 100 571.0 103 21582.0 104 1949.0 105 850.0 110 64.0 113 20.0 114 86.0 117 1212.0 142 44.0 163 412.0 164 32.0 172 447.0 173 138.0 174 51.0 184 57.0 189 815.0 190 116.0 197 21.0 200 10.0 201 114.0 202 65.0 205 222.0 214 112.0 216 35.0 217 8093.0 218 1576.0 219 397.0 220 34.0 221 96.0 225 24.0 244 27.0 256 36.0 261 19.0 262 14.0 263 50.0 275 42.0 277 708.0 278 223.0 279 88.…	945	7112	3508	1020	1693	1465	1319	3713	1855	2876	3531	2383	1086	567	6383	1152	1759	2356	2771	4473	2112	3108	1742	2360	1056	1076	6506	2311	2138	2243	4993	4663	2924	1691	2977	1738	2367	1060	6651	3391	3777
116	isothreonic acid	identified compound	JPIJQSOTBSSVTP-GBXIJSLDSA-N	151152	489385	292	1679	85:304.0 86:391.0 88:631.0 89:4158.0 90:414.0 91:179.0 92:233.0 93:215.0 94:45.0 96:145.0 97:116.0 98:15.0 99:816.0 100:110.0 101:2762.0 102:21122.0 103:20966.0 104:2634.0 105:1408.0 106:64.0 107:560.0 108:290.0 109:71.0 110:395.0 111:105.0 113:1032.0 114:253.0 115:1508.0 116:877.0 117:33848.0 118:3267.0 119:2907.0 120:140.0 121:96.0 122:8.0 124:18.0 125:13.0 127:531.0 128:50.0 129:6995.0 130:178…	6297	13002	8392	2324	3931	4393	4773	3484	4595	3571	4756	3993	4644	5871	12537	5140	4103	5466	6069	7685	4459	3419	4419	4479	6433	5249	13972	6494	4302	5534	4820	5905	4396	3719	5813	7508	4383	5254	16074	6104	7294
120	isoleucine 1TMS	identified compound	AGPKZVBTJJNPAG-WHFBIAKZSA-N	6306	295269	86	66254	85 29700.0 86 1679594.0 87 1033918.0 88 242006.0 89 32530.0 90 4609.0 91 25638.0 92 13288.0 93 1456.0 94 2719.0 95 2541.0 96 35629.0 97 10944.0 99 18277.0 100 18364.0 101 10494.0 102 46817.0 103 665017.0 104 227754.0 105 52459.0 106 10467.0 110 6937.0 111 2076.0 112 2915.0 113 6827.0 114 8081.0 115 7642.0 116 5697.0 117 20375.0 118 14990.0 119 10663.0 120 5135.0 121 1306.0 122 469.0 124 3636.0 12…	59339	84479	109120	97756	94017	108961	193590	98657	81212	95323	113800	145142	94700	119616	120158	95644	118979	137257	137021	134498	85414	47743	106753	134360	134829	60991	118852	90166	69036	197845	92825	82453	126899	96232	112361	165591	237549	94224	136190	146870	178114
121	isoleucine	identified compound	AGPKZVBTJJNPAG-WHFBIAKZSA-N	6306	361332	158	68062	85:1549.0 86:3001.0 87:645.0 88:285.0 89:271.0 90:580.0 91:64.0 92:52.0 95:58.0 96:323.0 97:189.0 98:829.0 99:977.0 100:9875.0 101:1414.0 102:3456.0 103:1535.0 104:311.0 105:134.0 111:127.0 112:440.0 113:373.0 114:1505.0 115:765.0 116:651.0 118:274.0 119:292.0 121:53.0 123:27.0 126:183.0 128:1693.0 129:920.0 130:964.0 131:1559.0 132:2068.0 133:2024.0 135:106.0 142:989.0 143:511.0 144:398.0 145:30…	213513	246501	110400	79465	94155	97355	160531	109197	74924	99523	138734	144004	97492	136455	120175	85227	97726	146491	183876	222161	86548	169041	123676	176204	134777	167424	126745	101500	228671	246818	110411	90931	145232	114659	139154	201534	299515	106420	140586	189640	169023
122	isocitric acid	identified compound	ODBLHEXUDAPZAU-UHFFFAOYSA-N	1198	616323	245	12267	89 522.0 90 180.0 95 584.0 97 191.0 98 207.0 99 600.0 101 378.0 102 3.0 103 489.0 106 964.0 109 156.0 112 78.0 113 859.0 114 122.0 116 611.0 118 39.0 119 171.0 121 116.0 125 52.0 127 331.0 128 413.0 129 390.0 133 1883.0 136 574.0 140 130.0 143 846.0 144 381.0 145 464.0 147 7317.0 148 543.0 149 1044.0 150 416.0 151 31.0 155 15.0 156 300.0 157 980.0 158 167.0 159 58.0 161 79.0 163 99.0 167 4.0 169 …	2846	17912	842	1539	1500	2448	1705	1853	1905	1738	1980	2411	2533	2842	13652	2429	2025	2197	1552	2938	1815	1546	1937	2045	2831	2626	15854	2685	1711	2334	1285	3108	2435	2001	1703	2710	1741	3038	17279	1777	3382
123	indole-3-propionic acid	identified compound	GOLXRNDWAUTYKT-UHFFFAOYSA-N	3744	732249	202	112556	87:70.0 88:158.0 89:68.0 90:41.0 91:71.0 92:64.0 95:39.0 97:42.0 98:35.0 99:26.0 100:39.0 101:366.0 102:341.0 103:158.0 105:171.0 106:49.0 107:35.0 110:22.0 112:28.0 115:425.0 116:1095.0 117:386.0 118:130.0 119:72.0 120:57.0 121:56.0 122:61.0 125:26.0 126:56.0 128:201.0 129:687.0 130:640.0 131:205.0 132:135.0 133:93.0 134:96.0 135:71.0 136:49.0 138:51.0 140:47.0 141:68.0 142:207.0 143:295.0 144:2…	8525	2315	3369	523	2219	2271	6745	5221	2796	2820	2957	1916	3759	8267	3356	2504	1176	2680	3156	6786	4937	1228	14712	3206	1770	7610	2204	2713	1985	2671	1450	7661	1968	1251	1217	4919	2640	7109	3152	4871	7966
124	indole-3-lactate	identified compound	XGILAAMKEQUXLS-UHFFFAOYSA-N	92904	764586	202	724	88:69.0 93:61.0 95:49.0 102:117.0 104:35.0 109:35.0 112:18.0 116:72.0 117:141.0 119:48.0 124:41.0 129:278.0 133:172.0 135:26.0 136:22.0 137:31.0 140:24.0 142:37.0 143:39.0 144:38.0 145:47.0 147:362.0 148:87.0 149:117.0 151:18.0 156:56.0 158:20.0 160:37.0 162:39.0 164:15.0 165:27.0 169:26.0 170:56.0 173:22.0 181:25.0 182:31.0 183:24.0 184:33.0 185:30.0 186:21.0 188:34.0 194:24.0 195:23.0 200:39.0 …	6202	6778	6788	2566	5734	2895	5300	6795	3465	3116	6799	15184	3730	6052	5893	4958	3602	5914	7814	10787	2384	4192	7248	8208	7392	5631	6272	7401	5589	9715	5103	5125	6267	4636	7073	5069	6291	5365	6808	4228	6729
125	indole-3-acetate	identified compound	SEOVTRFCIGRIMH-UHFFFAOYSA-N	802	684929	202	69	85:142.0 87:38.0 89:42.0 91:40.0 100:21.0 101:105.0 102:208.0 105:43.0 115:43.0 116:34.0 119:53.0 121:26.0 128:130.0 129:377.0 130:199.0 131:197.0 133:47.0 145:101.0 148:147.0 157:44.0 160:50.0 161:30.0 167:14.0 169:17.0 170:37.0 172:34.0 174:29.0 184:57.0 186:179.0 187:57.0 200:136.0 201:41.0 202:3519.0 203:606.0 204:162.0 217:45.0 226:14.0 228:28.0 276:55.0 319:239.0 320:67.0 321:16.0 330:17.0 …	13900	12552	13739	3251	5561	5106	5853	6335	6080	6675	8194	12049	14143	14341	11577	21151	7124	13326	15139	28393	5442	8681	11119	5086	11110	17089	10711	12423	11929	11516	7011	15936	33557	18866	6179	15575	11437	12196	12496	7477	23190
126	hypoxanthine	identified compound	FDGQSTZJBFJUBT-UHFFFAOYSA-N	790	619107	265	34194	85:17650.0 86:12163.0 87:3151.0 88:967.0 89:1497.0 90:1362.0 91:1011.0 92:2327.0 93:2705.0 94:2109.0 95:8249.0 96:4731.0 97:4274.0 98:10523.0 99:10631.0 100:18705.0 101:4328.0 102:2856.0 103:1825.0 104:825.0 105:732.0 106:877.0 107:1246.0 108:1010.0 109:1929.0 110:7804.0 111:16720.0 112:8157.0 113:3184.0 114:2386.0 115:2768.0 116:1782.0 117:3672.0 118:1096.0 119:3047.0 120:887.0 121:1152.0 122:16…	6382	9363	5557	1723	2619	2509	2495	1630	3538	2295	6057	2614	2515	6220	7693	2224	1814	4358	5005	5084	2139	2025	1874	2377	3818	5611	7372	1950	2448	2776	1681	2195	1086	2616	4439	8581	2379	5118	9185	4327	1985
127	hydroxycarbamate	identified compound	VSKFADHADUWCCL-UHFFFAOYSA-N	22345099	325948	278	7010	86:3909.0 89:5546.0 91:162.0 98:928.0 100:9202.0 103:3112.0 104:804.0 105:1118.0 109:43.0 115:2742.0 116:1447.0 117:1902.0 118:782.0 119:6979.0 120:481.0 121:178.0 123:62.0 131:6529.0 133:21267.0 134:4246.0 135:2007.0 144:446.0 145:185.0 147:31804.0 152:25.0 160:14456.0 161:3001.0 162:1040.0 163:900.0 169:62.0 188:1604.0 196:22.0 205:1022.0 206:398.0 207:1225.0 208:224.0 213:39.0 215:46.0 221:679…	12853	16464	18395	6302	7101	7727	10338	10254	7274	10501	12888	7627	9250	14218	13437	16316	9746	15201	14195	17509	13121	21961	16847	15593	12165	27642	16439	11324	15998	17225	17217	22955	16767	16406	17793	22280	15193	21232	26178	19831	23748
130	histidine	identified compound	HNDVDQJCIGZPNO-YFKPBYRVSA-N	6274	663790	154	150	85:2890.0 93:749.0 96:1216.0 99:1683.0 103:19424.0 104:1772.0 110:484.0 111:1094.0 117:11967.0 122:61.0 125:472.0 126:1287.0 127:972.0 129:8078.0 131:3919.0 132:2673.0 133:8915.0 136:283.0 139:564.0 141:723.0 143:1235.0 147:33916.0 148:4540.0 153:4278.0 154:100871.0 155:24437.0 157:5328.0 165:225.0 166:1571.0 167:1039.0 168:682.0 181:153.0 182:1912.0 183:1352.0 184:379.0 189:2802.0 190:863.0 191:…	101864	112333	102736	49854	74824	69201	125535	73215	59204	77307	98126	96908	86498	81170	63388	66165	66050	88617	111456	80600	54126	99183	91008	78536	114818	99807	63658	83087	123802	109578	81013	95640	78360	82616	91777	122126	103752	53126	62347	91361	106484
131	hippuric acid	identified compound	QIAFMBKCNZACKA-UHFFFAOYSA-N	464	636836	206	33211	85 355.0 86 1401.0 87 1382.0 88 720.0 89 2667.0 90 839.0 91 697.0 92 138.0 93 313.0 94 13.0 95 8.0 96 554.0 98 22.0 99 109.0 100 758.0 101 1108.0 102 859.0 103 7141.0 104 2047.0 105 45958.0 106 3596.0 107 250.0 108 20.0 109 99.0 111 43.0 112 67.0 113 499.0 114 298.0 115 65.0 116 2644.0 117 6621.0 118 1589.0 119 549.0 120 129.0 121 365.0 126 116.0 128 248.0 129 256.0 130 294.0 131 953.0 132 464.0 …	3976	6993	2904	559	1439	1240	2222	2093	1166	1287	2823	2584	4865	3446	5326	8641	666	1388	2079	11163	3353	755	5495	1041	4278	3682	5604	4430	3213	3729	1035	8738	1378	3362	1466	3115	2448	4110	6728	1898	5511
132	heptadecanoic acid	identified compound	KEMQGTRYUADPNZ-UHFFFAOYSA-N	10465	751309	117	727	86:84.0 89:126.0 93:146.0 95:297.0 97:364.0 98:171.0 99:152.0 101:71.0 105:120.0 107:47.0 109:65.0 111:142.0 112:68.0 113:69.0 116:319.0 117:6884.0 118:515.0 119:190.0 123:26.0 125:38.0 129:2928.0 130:357.0 131:779.0 132:2003.0 133:510.0 134:126.0 141:18.0 143:248.0 145:1080.0 146:130.0 149:39.0 152:19.0 153:14.0 159:91.0 163:18.0 171:63.0 174:86.0 177:28.0 182:19.0 187:82.0 189:15.0 197:18.0 201…	10930	5923	11131	4459	4919	5878	11059	5343	5642	5089	6343	4995	6780	7304	6323	5643	6592	5840	7458	11078	6530	6728	7529	7106	7476	11594	7059	7710	7557	10347	7001	7480	4708	7298	8741	13575	7211	12748	8354	8633	6567
133	glycolic acid	identified compound	AEMRFAOFKBGASW-UHFFFAOYSA-N	3698251	227636	177	1971	86:321.0 87:877.0 88:2215.0 89:1177.0 90:166.0 92:46.0 95:690.0 98:47.0 99:43.0 100:1.0 101:491.0 102:395.0 103:3236.0 104:445.0 105:759.0 106:5.0 107:431.0 110:197.0 113:123.0 114:1.0 115:778.0 116:235.0 117:2708.0 118:351.0 119:694.0 120:123.0 121:18.0 124:3.0 131:2476.0 132:305.0 133:6921.0 134:1259.0 135:297.0 144:1.0 146:382.0 147:57199.0 148:9255.0 149:5731.0 150:464.0 151:221.0 161:3331.0 …	13775	30740	7969	8921	7641	22654	11724	9587	8834	8372	10859	8369	13503	11676	9635	11414	12066	15499	12842	14032	6725	11446	11589	11988	12564	14370	30317	10012	12067	12543	9687	11600	13943	12147	11557	18808	13505	12236	12066	18703	13552
136	glycine TMS1x	identified compound	DHMQDGOQFOQNFH-UHFFFAOYSA-N	5257127	255803	102	403	85:364.0 86:2191.0 87:345.0 88:52.0 95:65.0 100:102.0 101:395.0 102:35827.0 103:4699.0 104:939.0 105:266.0 114:87.0 118:156.0 123:18.0 131:691.0 136:20.0 147:11903.0 148:334.0 149:790.0 150:71.0 155:19.0 158:83.0 159:23.0 161:54.0 174:46.0 176:1300.0 177:230.0 178:114.0 199:50.0 204:1150.0 205:212.0 206:114.0 207:27.0 223:25.0 230:22.0 237:17.0 280:12.0 291:20.0 296:28.0 297:12.0 307:20.0 309:18.…	291360	474993	40784	92307	104156	184691	96552	139744	105497	156950	122323	147325	282970	120777	124867	178208	90419	92480	118627	100754	61942	224452	117742	142475	116379	144458	98186	195277	211537	121173	78736	111666	103550	82392	92196	75424	99050	67642	100026	99958	131479
137	glycine	identified compound	DHMQDGOQFOQNFH-UHFFFAOYSA-N	5257127	371151	248	64525	85:2882.0 86:87494.0 87:10917.0 88:4018.0 89:822.0 92:65.0 93:42.0 94:27.0 95:426.0 96:50.0 97:67.0 99:1489.0 100:53029.0 101:10140.0 102:5892.0 103:928.0 105:1276.0 110:146.0 113:1787.0 114:44.0 115:2820.0 116:1864.0 117:12472.0 118:47.0 119:3422.0 122:40.0 123:85.0 125:63.0 129:156.0 130:9640.0 131:7466.0 132:862.0 133:31722.0 134:5661.0 135:2633.0 144:2949.0 145:349.0 146:1208.0 147:26782.0 14…	56153	94910	191657	22231	37242	68988	35839	80984	37866	75145	55510	54858	99311	58958	82912	102457	43615	53622	52307	44337	46906	74535	65500	68876	39348	62168	99372	121084	135112	75561	77846	113274	75591	66721	78644	103573	71542	57810	121931	97852	148260
138	glycerol-alpha-phosphate	identified compound	AWUCVROLDVIAJX-UHFFFAOYSA-N	754	593396	357	46174	87:8694.0 88:4191.0 89:11433.0 91:1884.0 92:79.0 93:566.0 94:275.0 101:102101.0 102:12242.0 103:100742.0 104:10244.0 105:10029.0 106:1478.0 107:3362.0 108:394.0 109:1271.0 114:1073.0 115:21169.0 116:22830.0 117:21094.0 118:3210.0 119:10846.0 120:1726.0 121:5718.0 122:528.0 123:2359.0 124:280.0 129:67176.0 130:12007.0 131:50454.0 132:6337.0 133:92102.0 134:12770.0 135:27101.0 136:3144.0 137:9042.0…	1422	9514	2110	765	806	664	891	819	729	767	1073	1203	844	1187	9562	1159	934	948	1136	1157	841	848	925	1257	968	1046	11097	1465	849	1283	754	1005	1176	830	1123	1409	1148	1080	11467	1287	1403
139	glycerol-3-galactoside	identified compound	NHJUPBDCSOGIKX-NTXXKDEISA-N	16048618	805227	204	1693	89:176.0 90:53.0 99:49.0 101:827.0 102:83.0 103:3126.0 104:331.0 105:191.0 109:15.0 113:33.0 115:65.0 116:293.0 117:746.0 118:35.0 119:28.0 122:1.0 123:8.0 128:61.0 129:2561.0 130:485.0 131:662.0 132:17.0 133:977.0 135:25.0 141:39.0 142:42.0 143:281.0 147:3311.0 148:255.0 149:318.0 151:50.0 155:78.0 156:127.0 157:175.0 159:38.0 160:42.0 161:110.0 163:57.0 169:415.0 170:55.0 171:14.0 175:57.0 177:…	24638	4679	19747	7109	8924	6787	36522	8606	8509	11008	16241	6597	7291	26097	20260	7616	6002	17931	17501	15726	4720	6716	21817	9006	22853	32262	15789	7484	15640	21745	12054	12767	16463	9713	20834	41519	11844	39670	17911	19832	14139
140	glycerol	identified compound	PEDCQBHIVMGVHV-UHFFFAOYSA-N	753	344466	205	30	85:1069.0 86:1979.0 87:2157.0 88:1086.0 89:5466.0 90:494.0 91:283.0 94:134.0 97:170.0 99:483.0 100:547.0 101:7688.0 102:1229.0 103:30772.0 104:2994.0 105:1697.0 106:143.0 108:135.0 109:140.0 111:130.0 112:89.0 113:993.0 114:232.0 115:2539.0 116:2329.0 117:35562.0 118:3659.0 119:3831.0 120:444.0 121:441.0 122:107.0 123:185.0 124:113.0 128:225.0 129:5116.0 130:612.0 131:6207.0 132:1094.0 133:25238.…	205522	212791	170938	131611	194419	221050	198688	142611	203155	137697	151792	100629	173099	200274	185567	164127	158264	113495	124649	189251	114002	108836	39151	35278	140092	179037	177415	31801	88994	78515	85852	223755	97984	122388	123961	332710	109913	191639	205241	136403	217897
141	glyceric acid	identified compound	RBNPOMFGQQGHHO-UWTATZPHSA-N	439194	377495	189	48	87:199.0 89:698.0 90:111.0 93:56.0 98:33.0 99:176.0 100:63.0 101:1315.0 102:3672.0 103:4054.0 104:371.0 105:293.0 106:106.0 107:60.0 108:48.0 113:36.0 114:94.0 115:261.0 116:366.0 117:2480.0 119:409.0 122:34.0 130:941.0 131:1036.0 133:4658.0 135:416.0 142:23.0 147:8908.0 148:1388.0 149:813.0 157:22.0 158:22.0 159:33.0 161:42.0 162:30.0 163:86.0 166:42.0 175:382.0 176:31.0 177:220.0 189:3993.0 190…	21198	38254	24294	6887	12059	30541	13139	7188	14099	11110	9245	8215	12906	20461	31006	8699	17172	20589	24236	26097	6534	11408	12945	8391	10803	18294	34059	8583	19368	12204	11167	30539	15182	11950	20881	32619	10038	18611	39196	18212	14289
142	glutaric acid	identified compound	JFCQEDHGNNZCLN-UHFFFAOYSA-N	23322899	421260	261	1727	85:4857.0 86:408.0 87:632.0 88:1429.0 89:752.0 92:72.0 93:162.0 94:11.0 95:581.0 97:15164.0 98:1176.0 99:2227.0 101:4169.0 102:981.0 103:27.0 106:67.0 107:367.0 110:432.0 111:140.0 113:709.0 114:83.0 115:2230.0 116:9480.0 117:5385.0 118:622.0 119:88.0 123:1269.0 124:368.0 126:294.0 127:328.0 128:231.0 129:14698.0 130:6115.0 131:3690.0 132:878.0 133:5237.0 138:106.0 140:284.0 141:16.0 142:59.0 143…	571	2878	348	216	304	1947	749	471	261	273	321	376	216	330	362	364	513	203	229	528	326	385	382	371	409	412	3652	379	330	396	360	1431	505	319	278	368	414	431	412	786	386
147	glutamine dehydrated 2tms	identified compound	ZDXPYRJPNDTMRX-VKHMYHEASA-N	5961	492607	155	4527	85:133.0 87:378.0 93:7.0 98:62.0 99:106.0 100:98.0 102:46.0 107:267.0 108:37.0 109:13.0 110:9.0 112:310.0 114:63.0 115:10.0 117:42.0 118:26.0 129:179.0 131:5.0 132:43.0 137:9.0 138:29.0 139:542.0 140:55.0 141:27.0 143:102.0 147:138.0 153:65.0 154:31.0 155:4890.0 156:799.0 157:246.0 158:18.0 167:5.0 169:1.0 184:192.0 185:342.0 186:43.0 209:20.0 212:3.0 217:2.0 228:16.0 229:156.0 232:1.0 238:1.0 24…	21914	27069	26288	27737	40694	59124	11904	57578	44397	56434	71575	61871	55082	38476	31644	33301	30066	48884	50915	52320	21862	35526	48978	57343	25479	14152	27549	47145	33348	52302	25979	34901	45766	37251	43398	35142	47082	23984	34541	39023	54790
148	glutamine 2TMS	identified compound	ZDXPYRJPNDTMRX-VKHMYHEASA-N	5961	568443	173	390543	85:320.0 86:131.0 87:210.0 88:62.0 90:1200.0 91:116.0 94:17.0 98:80.0 99:124.0 100:266.0 102:138.0 103:103.0 114:52.0 115:525.0 116:901.0 117:302.0 118:42.0 126:35.0 127:132.0 128:301.0 130:210.0 131:885.0 132:137.0 133:183.0 139:322.0 140:222.0 142:132.0 143:29.0 144:99.0 145:60.0 146:114.0 147:762.0 154:48.0 155:1408.0 156:2872.0 157:643.0 158:433.0 159:51.0 166:15.0 167:39.0 172:138.0 173:3030…	12741	12378	16918	12999	15549	21658	7738	24873	17103	25243	21819	26177	24040	23831	16134	23271	13678	16713	17641	23759	13323	17157	22270	25872	12863	11423	15796	20380	14662	25445	15162	20961	26693	22591	22005	22789	22443	19400	20085	24501	30119
149	glutamine	identified compound	WHUUTDBJXJRKMK-VKHMYHEASA-N	33032	600315	156	18	85:588.0 86:773.0 87:527.0 88:297.0 89:472.0 90:276.0 91:144.0 92:65.0 93:78.0 94:61.0 95:137.0 96:185.0 97:201.0 98:705.0 99:418.0 100:4218.0 101:1051.0 102:801.0 104:146.0 105:125.0 107:73.0 110:227.0 111:76.0 112:1090.0 113:753.0 114:2855.0 115:2580.0 116:2463.0 117:1187.0 118:279.0 119:308.0 122:34.0 124:65.0 125:100.0 126:1306.0 128:4527.0 129:1216.0 130:1701.0 131:3856.0 132:1540.0 133:2992…	749539	567265	620398	324258	331100	402924	499748	466173	342383	438945	461241	575284	570523	487242	265286	336613	285396	399308	482991	437453	289427	667500	476014	545103	556472	598757	291111	529195	576600	508960	425277	488848	586915	400512	448413	698700	470931	332162	305588	663657	468377
150	glutamic acid	identified compound	WHUUTDBJXJRKMK-VKHMYHEASA-N	33032	527086	246	16576	85:1143.0 86:983.0 87:725.0 88:453.0 89:313.0 90:36.0 91:51.0 95:189.0 96:269.0 97:224.0 98:467.0 99:626.0 100:5243.0 101:1252.0 102:493.0 103:1043.0 104:79.0 105:259.0 108:335.0 109:58.0 110:448.0 111:44.0 112:737.0 113:669.0 114:1398.0 115:911.0 116:669.0 117:712.0 118:217.0 119:303.0 120:26.0 122:179.0 123:41.0 125:90.0 126:202.0 127:190.0 128:17149.0 129:3445.0 130:1476.0 131:1330.0 132:969.0…	57886	141261	48273	26796	39488	23576	76179	20614	28263	40898	42988	26678	38758	40723	79019	17395	40808	40468	49126	41023	30112	26286	23559	33546	40976	45241	83805	23342	43262	38095	29727	81422	50666	26203	27943	61032	53786	29384	96043	33957	20707
154	glutamate	identified compound	WHUUTDBJXJRKMK-VKHMYHEASA-N	33032	489240	174	62245	85:467865.0 86:64094.0 88:32861.0 89:26374.0 90:8704.0 91:18223.0 92:2947.0 93:643.0 94:2871.0 95:3473.0 96:2772.0 98:11481.0 99:11306.0 100:26566.0 101:48699.0 102:28371.0 103:63109.0 104:10692.0 105:8292.0 106:1102.0 108:2160.0 110:3756.0 111:1255.0 112:31454.0 113:12985.0 114:22937.0 115:19830.0 116:90470.0 117:81171.0 118:17445.0 119:11118.0 120:1969.0 122:3511.0 123:376.0 124:4975.0 125:223.…	7923	11829	19112	8655	15742	11084	23203	9471	11132	20263	23022	11577	14083	19442	39685	9372	15579	19515	22067	18908	10965	2886	5448	14064	15496	9711	20986	7677	4553	19626	8979	28814	21272	7223	11168	24121	21254	7229	45001	6482	11871
155	glucuronic acid	identified compound	AEMOLEFTQBMNLQ-AQKNRBDQSA-N	94715	665901	333	344793	96:183.0 101:343.0 104:391.0 105:404.0 114:173.0 116:299.0 118:199.0 129:212.0 131:935.0 133:2270.0 140:93.0 142:73.0 143:1502.0 145:268.0 147:12395.0 148:991.0 149:975.0 157:922.0 158:137.0 160:9222.0 161:1178.0 163:298.0 169:69.0 184:291.0 189:2493.0 191:243.0 192:148.0 200:124.0 201:100.0 203:144.0 204:559.0 205:544.0 206:869.0 215:56.0 216:211.0 217:2377.0 218:761.0 219:1170.0 220:242.0 224:4…	4020	3331	3066	1954	2883	7600	3254	3255	2226	2399	3618	2582	2189	3955	2556	3052	2529	3466	3974	5749	1443	2531	3937	2601	4179	3845	4378	2879	2873	3922	2921	6230	2624	2443	6666	5148	2770	3029	4329	2679	2263
156	glucose-1-phosphate	identified compound	HXXFSFRBOHSIMQ-VFUOTHLCSA-N	65533	594647	217	3167	85:385.0 86:98.0 87:248.0 88:286.0 89:468.0 90:224.0 92:20.0 95:218.0 99:284.0 101:1180.0 103:1916.0 104:47.0 107:220.0 109:96.0 110:193.0 111:260.0 112:20.0 113:386.0 114:41.0 115:209.0 116:863.0 117:2309.0 118:189.0 119:243.0 125:12.0 126:151.0 128:127.0 129:1571.0 130:306.0 131:508.0 132:123.0 133:2331.0 134:352.0 135:130.0 136:1.0 139:40.0 140:858.0 141:105.0 142:138.0 143:915.0 144:125.0 145…	5251	4801	3147	2613	2045	3069	11205	3519	3159	2123	3703	4225	2397	4283	4133	3198	3428	3328	2851	4787	2885	3083	2110	3293	3700	4535	4669	4231	1831	4486	2944	4091	3782	2952	4529	8665	4151	514	4148	5917	3353
157	glucose tms4x	identified compound	WQZGKKKJIJFFOK-GASJEMHNSA-N	5793	675179	217	71	88:65.0 89:1335.0 90:95.0 91:159.0 92:42.0 94:44.0 96:80.0 97:138.0 99:306.0 101:314.0 102:63.0 103:2308.0 104:201.0 105:249.0 106:37.0 109:105.0 110:107.0 111:113.0 112:49.0 113:111.0 114:132.0 115:246.0 116:252.0 117:1574.0 119:155.0 122:39.0 127:37.0 129:1861.0 130:640.0 131:664.0 132:299.0 133:1039.0 134:215.0 135:117.0 138:39.0 139:39.0 140:20.0 143:315.0 144:54.0 145:275.0 146:83.0 147:2302…	108900	153195	107345	68284	101721	84590	469730	91979	86540	108675	142442	126435	129351	126671	132306	122789	87338	118438	139021	140465	74875	99169	152654	107103	244395	109890	135598	119683	94320	159199	82446	127254	117879	103940	115855	239019	117688	92718	151572	144495	99006
158	glucose non-meox	identified compound	WQZGKKKJIJFFOK-GASJEMHNSA-N	5793	679776	191	131	87:305.0 88:112.0 90:36.0 94:57.0 97:566.0 98:87.0 101:2366.0 103:3910.0 104:336.0 105:92.0 106:52.0 107:68.0 109:106.0 111:1260.0 113:406.0 114:65.0 115:468.0 116:871.0 117:2570.0 118:342.0 119:415.0 120:83.0 123:49.0 127:417.0 128:187.0 129:3748.0 131:2252.0 132:145.0 133:3697.0 134:462.0 135:335.0 139:91.0 141:317.0 143:757.0 145:266.0 147:14073.0 148:1569.0 149:1246.0 150:179.0 151:120.0 153:…	4566784	685275	1176343	801874	977807	672590	5401859	843253	803530	1080007	1341166	831642	997626	4505590	1562524	859623	776652	1381933	1206940	1826737	684432	774864	1939282	925514	3575940	4407935	1474731	796470	1108575	2198960	990634	1159084	1097968	874362	1426072	4717151	1293315	4898162	1970322	1329816	757656
159	glucose 4xtms	identified compound	WQZGKKKJIJFFOK-GASJEMHNSA-N	5793	678811	217	17290	85:126.0 86:88.0 87:341.0 88:181.0 89:3107.0 90:197.0 91:200.0 98:117.0 100:442.0 101:825.0 102:535.0 103:4868.0 104:460.0 105:358.0 109:147.0 110:59.0 111:262.0 112:83.0 114:193.0 115:550.0 116:498.0 117:2324.0 118:329.0 119:437.0 120:47.0 121:26.0 123:28.0 126:108.0 128:203.0 129:3926.0 132:251.0 133:592.0 135:206.0 137:31.0 139:80.0 141:38.0 142:358.0 143:713.0 144:157.0 145:278.0 146:136.0 14…	2023955	301412	566440	357169	436028	294873	2502075	400818	365922	525591	630566	375563	484185	2028318	843052	385581	350294	666815	547470	863936	307749	345485	910353	432848	1617418	2133428	666031	351999	143389	1039300	463217	553615	482260	389172	659173	2091955	480736	2176371	928314	627958	344817
160	glucose 2	identified compound	WQZGKKKJIJFFOK-GASJEMHNSA-N	5793	659798	319	22	85:955.0 86:739.0 87:1963.0 88:1249.0 89:23654.0 90:1741.0 91:1135.0 94:110.0 95:64.0 96:681.0 97:924.0 98:177.0 99:1302.0 100:4269.0 101:5985.0 102:2628.0 103:55876.0 104:5298.0 105:6003.0 106:471.0 107:134.0 108:44.0 109:106.0 110:151.0 111:715.0 112:295.0 113:1157.0 114:1065.0 115:1902.0 116:1693.0 117:24869.0 118:2407.0 119:3013.0 120:325.0 121:179.0 122:26.0 125:71.0 126:224.0 127:784.0 128:…	1546666	1975482	1431897	1009565	1319863	1204364	1782161	1327127	1206548	1535083	1856701	1751485	1586669	1514587	1571007	1566914	1223374	1452158	1713424	1819047	1048080	1362668	1948070	1467490	2356803	1359669	1731203	1563001	1320451	1959695	1236356	1613587	1549526	1366583	1541377	2470897	1545319	1220637	1877894	1935406	1297084
161	glucose 1	identified compound	WQZGKKKJIJFFOK-GASJEMHNSA-N	5793	654125	319	46121	85 27336.0 86 54416.0 87 30651.0 88 38651.0 89 366599.0 90 36080.0 91 15303.0 92 1554.0 94 1223.0 96 2799.0 97 6099.0 98 10995.0 99 19718.0 100 87123.0 101 85401.0 102 59781.0 103 897747.0 104 99055.0 105 174987.0 106 22215.0 107 8839.0 108 2715.0 109 1559.0 110 6479.0 111 4651.0 112 13414.0 113 17399.0 114 83866.0 115 34438.0 116 28906.0 117 483116.0 118 61306.0 119 53471.0 120 7817.0 121 4264.0…	4157789	4278044	4090209	3656242	3931137	3785264	5753437	3954468	3821488	4124035	4253365	4241363	4183767	4169599	4168857	4182296	3905023	4096871	4241237	4273504	3699252	3966996	4269621	4131726	4506710	4087730	4269789	4185407	3997627	4306459	3931026	4184905	4241038	4022231	4204352	4409482	4228998	691135	998288	4392464	4024995
162	gluconic acid	identified compound	RGHNJXZEOKUKBD-SQOUGZDYSA-N	10690	693148	333	7501	87:39.0 89:155.0 99:15.0 100:306.0 101:268.0 102:393.0 103:2729.0 104:264.0 105:196.0 109:2.0 111:2.0 113:144.0 116:8.0 117:1117.0 118:12.0 127:30.0 129:1186.0 130:285.0 131:546.0 132:183.0 133:997.0 134:13.0 137:1.0 139:7.0 140:38.0 141:4.0 142:28.0 143:746.0 144:263.0 145:25.0 147:6161.0 148:1144.0 149:642.0 150:39.0 151:46.0 153:74.0 154:66.0 155:3.0 157:599.0 159:89.0 160:27.0 161:88.0 164:14…	2109	2794	1436	892	1330	1596	4330	1936	1548	1497	1905	1195	2159	2196	2669	1926	1865	2982	2600	4313	1543	2750	2647	2027	2090	2312	1821	2456	1523	2447	1133	1694	924	1230	2554	5576	1503	2033	1828	2173	2759
164	galactonic acid	identified compound	RGHNJXZEOKUKBD-MGCNEYSASA-N	128869	690882	292	4706	85:918.0 86:238.0 87:865.0 88:630.0 89:3376.0 90:737.0 91:316.0 95:57.0 96:68.0 97:1011.0 98:413.0 99:1406.0 100:448.0 101:4514.0 102:3806.0 103:26292.0 104:2417.0 105:1403.0 106:36.0 107:255.0 108:13.0 109:160.0 110:149.0 111:353.0 112:80.0 113:956.0 114:440.0 115:1587.0 116:1106.0 117:12863.0 118:1333.0 119:1189.0 124:209.0 125:121.0 126:8.0 127:610.0 128:752.0 129:11296.0 130:3317.0 131:4665.0…	2864	1837	2019	1192	1484	1779	5702	1113	2011	1969	2284	1334	1765	2774	1439	1336	1123	1568	1891	2246	811	1259	1336	484	2803	3057	2510	1814	1945	1203	1343	2022	1167	832	1543	3528	1033	2732	2821	1351	1673
165	fumaric acid	identified compound	VZCYOOQTPOCHFL-OWOJBTEDSA-N	21883788	390016	245	14755	85:387.0 86:38.0 87:9.0 88:13.0 89:36.0 91:8.0 92:19.0 93:21.0 94:2.0 95:36.0 96:23.0 97:35.0 98:167.0 99:149.0 100:30.0 101:19.0 102:3.0 103:106.0 104:6.0 105:54.0 106:32.0 108:1.0 109:14.0 111:16.0 113:179.0 114:8.0 115:714.0 116:73.0 117:197.0 118:25.0 119:46.0 120:15.0 121:3.0 122:5.0 123:4.0 125:11.0 126:132.0 127:348.0 128:131.0 129:57.0 130:40.0 131:175.0 132:35.0 133:1168.0 134:224.0 135:…	3954	6383	2875	2788	3912	5193	4820	4945	4632	5516	6000	6496	5927	6406	6971	6737	6134	6666	7737	9550	6595	6871	8062	8096	9539	7538	9584	8679	8658	8874	8883	9540	10294	9449	9657	10628	9575	9558	10180	10926	11738
166	fucose 2	identified compound	SHZGCJCMOBCMKK-DHVFOXMCSA-N	17106	584895	117	31569	85 75.0 87 111.0 88 40.0 89 1323.0 90 89.0 91 104.0 99 12.0 100 605.0 101 338.0 102 122.0 103 1172.0 105 294.0 106 48.0 109 34.0 110 22.0 114 14.0 115 241.0 116 57.0 117 14287.0 118 1480.0 119 608.0 120 10.0 123 27.0 126 1.0 127 2.0 128 7.0 129 1134.0 130 379.0 131 959.0 132 109.0 133 835.0 134 163.0 140 8.0 142 6.0 143 263.0 144 33.0 145 34.0 147 1366.0 148 54.0 149 99.0 155 1.0 156 11.0 160 136…	7043	3194	3373	2200	3044	2853	7980	4679	2907	3641	4446	3437	3600	6950	3197	3719	3863	4579	5464	5280	2855	3642	4172	3382	6688	5464	3288	3276	3186	4493	3560	6267	6003	4503	5208	5729	3670	6511	3897	5359	4879
167	fucose 1	identified compound	SHZGCJCMOBCMKK-DHVFOXMCSA-N	17106	578299	160	3009	85:191.0 89:328.0 91:5.0 98:6.0 100:250.0 101:182.0 103:132.0 105:64.0 107:33.0 117:5349.0 118:423.0 119:197.0 127:28.0 129:429.0 130:344.0 131:248.0 133:363.0 134:138.0 143:112.0 147:658.0 148:60.0 159:12.0 160:926.0 161:309.0 162:4.0 171:31.0 174:36.0 189:39.0 191:27.0 204:79.0 205:9.0 206:19.0 217:28.0 219:124.0 223:10.0 231:37.0 233:151.0 235:13.0 277:238.0 278:54.0 293:13.0 299:12.0 321:80.0…	807	2849	2293	1731	90	2734	7599	1868	2240	2207	3203	2627	1222	1773	1984	3188	2084	2033	2000	3373	2576	2671	2192	2293	3852	1038	2230	2454	2222	2341	2924	4203	4081	2169	2079	3960	2767	2389	2684	2125	4265
169	fructose	identified compound	RFSUNEUAIZKAJO-ARQDHWQXSA-N	439709	641863	307	50366	86 65.0 87 79.0 88 18.0 89 2281.0 90 143.0 99 37.0 100 388.0 101 537.0 102 77.0 103 13851.0 104 1258.0 105 563.0 113 20.0 114 164.0 115 201.0 117 1833.0 118 120.0 119 138.0 122 14.0 125 109.0 128 143.0 129 782.0 130 84.0 131 499.0 133 1810.0 134 211.0 135 10.0 136 17.0 142 22.0 143 105.0 145 56.0 147 4583.0 148 705.0 149 481.0 150 25.0 151 26.0 156 27.0 157 146.0 159 19.0 163 118.0 167 3.0 171 41…	5981	1971	10908	1715	2757	2162	5075	2156	2079	2859	3252	3185	2489	5808	32855	15651	2820	3135	3457	2741	2955	3605	6437	2806	16498	272	36893	2827	3086	23533	3264	3016	4961	2415	2931	6157	3109	4462	40791	3682	34089
170	ethanolamine	identified compound	HZAXFHJVJLSVMW-UHFFFAOYSA-N	700	344675	174	113567	85 6259.0 87 11744.0 88 4770.0 89 35566.0 90 1339.0 91 4441.0 92 1163.0 93 1961.0 96 1819.0 100 6393.0 101 3188.0 108 1323.0 110 304.0 111 531.0 124 575.0 130 2171.0 140 164.0 143 635.0 149 3652.0 172 1177.0 174 33073.0 175 2807.0 176 1369.0 185 616.0 186 269.0 187 245.0 188 500.0 194 7375.0 196 788.0 197 3780.0 198 921.0 200 366.0 201 127.0 202 321.0 203 630.0 205 5236.0 215 456.0 216 294.0 217 …	16657	23761	45266	12241	16198	24614	22808	23049	16795	23600	28773	21511	24324	22016	28205	20632	20895	26212	23647	45283	17676	16373	27250	32541	27561	20446	31554	24617	28029	42676	28136	37155	22957	25085	32227	47973	34249	21994	39606	35037	41535
171	erythritol	identified compound	UNXHWFMMPAWVPI-ZXZARUISSA-N	222285	471922	217	92	86:57.0 87:443.0 89:682.0 90:92.0 99:480.0 100:41.0 101:1823.0 103:7046.0 104:676.0 105:300.0 106:59.0 109:27.0 111:45.0 113:474.0 115:473.0 116:1861.0 117:6123.0 118:476.0 119:295.0 127:453.0 129:1559.0 130:129.0 131:448.0 133:1902.0 134:216.0 144:53.0 147:9776.0 148:785.0 149:656.0 158:25.0 159:8.0 163:98.0 169:60.0 174:40.0 175:153.0 176:58.0 177:60.0 183:21.0 189:1255.0 190:194.0 191:893.0 19…	11479	10650	30496	4398	6570	6767	8461	8739	7488	6047	7915	10534	8244	10785	8828	13231	6313	8443	9577	12262	7847	5652	7423	11192	10434	9932	12641	14462	6214	13095	9201	10959	10182	7392	12023	18628	6928	9784	13504	8961	16402
172	cysteine	identified compound	XUJNEKJLAYXESH-REOHCLBHSA-N	5862	500158	220	65	86:175.0 90:83.0 91:341.0 97:81.0 98:68.0 100:3118.0 101:289.0 102:126.0 103:157.0 104:40.0 106:71.0 111:61.0 112:46.0 113:48.0 115:193.0 116:681.0 117:121.0 119:107.0 120:61.0 130:238.0 132:808.0 133:307.0 135:39.0 146:182.0 147:1274.0 149:187.0 163:84.0 172:22.0 204:108.0 217:15.0 218:2544.0 219:362.0 220:2803.0 221:383.0 222:297.0 223:28.0 231:29.0 232:38.0 262:21.0 287:23.0 301:27.0 304:25.0 …	8961	4475	1731	4054	4466	2428	6421	3392	3529	2788	4263	3808	3544	4475	1924	2358	5014	4137	3530	4431	3055	7418	4429	3665	7662	7027	1571	3738	6639	3437	3341	4059	2296	3208	3291	3541	3540	2481	1671	4122	2532
173	creatinine	identified compound	DDRJAANPRJIHGJ-UHFFFAOYSA-N	588	507768	115	34042	85:370.0 88:85.0 89:36.0 93:61.0 98:181.0 99:1414.0 100:9158.0 101:1232.0 103:128.0 108:34.0 111:15.0 113:594.0 114:567.0 115:27718.0 116:1868.0 118:47.0 124:34.0 130:931.0 134:91.0 135:38.0 136:59.0 139:101.0 142:85.0 143:10910.0 144:1070.0 147:1641.0 155:268.0 158:453.0 159:92.0 160:80.0 161:20.0 162:30.0 165:17.0 167:15.0 169:18.0 170:66.0 171:2993.0 172:140.0 173:285.0 174:113.0 175:26.0 176:…	77766	4275	3501	2466	2263	72998	2823	48395	67615	48592	3808	2828	44460	43177	2094	1627	2125	3554	72232	5225	35435	2140	1564	71063	4371	43370	1980	3271	2344	3260	47464	2195	1404	1920	1957	2006	2303	1593	2125	778	63369
174	creatine	identified compound	CVSVTCORWBXHQV-UHFFFAOYSA-N	586	502071	115	360149	85:5115.0 86:10981.0 87:3173.0 88:1620.0 89:1645.0 90:898.0 91:739.0 92:601.0 93:1030.0 94:2161.0 96:1066.0 97:830.0 98:1771.0 99:6398.0 100:44917.0 101:7555.0 102:2579.0 103:5585.0 104:2067.0 105:1874.0 106:489.0 107:307.0 108:234.0 109:195.0 110:1456.0 111:1050.0 112:1252.0 113:2993.0 114:12007.0 115:109751.0 116:56797.0 117:10479.0 118:944.0 119:731.0 122:496.0 123:134.0 124:390.0 125:432.0 12…	96744	63523	53305	45978	77234	94937	59167	59994	82489	60230	57250	58153	20284	53514	44711	33252	69508	69431	90229	62549	43977	44844	74534	87206	78911	56306	45543	88096	81529	64139	58300	36734	46833	52294	61758	73594	53219	30882	49492	56578	78704
175	conduritol-beta-expoxide	identified compound	ZHMWOVGZCINIHW-SPHYCDKFSA-N	9989541	701723	318	34065	85:102.0 86:7.0 88:11.0 93:17.0 95:84.0 99:141.0 100:46.0 101:367.0 102:34.0 103:1909.0 104:100.0 105:120.0 108:7.0 109:85.0 111:59.0 113:534.0 114:36.0 115:64.0 116:86.0 124:61.0 125:26.0 128:2.0 129:2049.0 130:323.0 131:745.0 132:109.0 133:2107.0 134:288.0 135:95.0 137:15.0 139:24.0 140:14.0 141:27.0 142:65.0 143:754.0 144:15.0 145:6.0 147:8476.0 148:1285.0 149:919.0 150:18.0 156:38.0 157:286.0…	1524	1875	2098	643	1219	5044	1665	575	1159	980	1950	1208	1527	1750	1751	895	1684	2235	2351	3785	534	1251	1845	1087	2171	1520	1882	1320	2487	1423	1027	3106	2263	1203	1866	4741	1310	1455	2051	1517	785
176	conduritol-beta-epoxide 2	identified compound	ZHMWOVGZCINIHW-SPHYCDKFSA-N	9989541	675635	318	2670	85 36.0 86 264.0 87 119.0 89 71.0 90 3.0 96 4.0 97 45.0 100 25.0 101 25.0 102 89.0 103 1499.0 104 98.0 106 19.0 108 25.0 110 52.0 111 13.0 113 96.0 114 7.0 115 120.0 116 89.0 117 65.0 120 22.0 121 16.0 122 20.0 125 21.0 126 64.0 127 5.0 128 52.0 129 2124.0 130 118.0 131 398.0 132 68.0 133 1415.0 139 13.0 140 24.0 141 13.0 142 4.0 143 397.0 144 106.0 146 101.0 147 5675.0 148 698.0 149 369.0 150 2.…	2167	1794	2261	602	4378	1476	2542	722	570	961	993	867	5578	2150	1697	888	1267	805	1119	3087	1329	571	1340	648	23432	2151	1518	1944	1114	1054	581	2145	1055	4108	947	11582	592	2027	2053	1155	651
177	citrulline	identified compound	RHGKLRLOHDJJDR-BYPYZUCNSA-N	6992098	589262	184	62268	85 72249.0 86 17154.0 87 8446.0 88 2856.0 89 37.0 90 7925.0 91 1027.0 92 314.0 95 17937.0 96 6439.0 98 12312.0 99 40864.0 100 14862.0 101 8436.0 102 3926.0 103 8898.0 104 493.0 105 1301.0 106 53.0 112 670.0 113 7225.0 114 4423.0 115 9977.0 116 13708.0 117 6475.0 118 1662.0 122 1765.0 123 244.0 124 777.0 125 11997.0 126 4807.0 127 15357.0 129 8970.0 130 19556.0 131 12742.0 132 2115.0 133 3514.0 13…	772	800	866	705	1489	1766	627	1647	1044	1071	1285	1976	924	1071	1490	1355	993	1317	941	1799	1423	1180	1324	1734	1105	976	1611	1708	1485	1753	1747	1559	1176	1468	2331	1501	2420	1905	1764	1667	2897
178	citrulline	identified compound	RHGKLRLOHDJJDR-BYPYZUCNSA-N	6992098	621404	157	1712	85:138.0 86:318.0 89:143.0 90:82.0 91:114.0 92:81.0 95:62.0 97:103.0 98:473.0 99:700.0 100:1254.0 101:216.0 102:109.0 103:52.0 104:50.0 107:195.0 108:36.0 109:94.0 110:101.0 111:43.0 113:64.0 114:128.0 115:311.0 116:35.0 117:38.0 118:54.0 120:48.0 122:24.0 124:39.0 126:87.0 127:262.0 128:173.0 129:140.0 130:668.0 132:139.0 133:229.0 134:91.0 138:26.0 140:306.0 141:1077.0 142:2134.0 143:284.0 144:…	18046	15291	17148	9922	16375	14790	21269	17982	10066	16288	15032	19359	12921	14494	16006	12641	10433	11871	13112	17798	16749	19001	18514	21707	23059	16840	18876	22250	23375	21416	23520	18430	15840	18392	25926	26042	31479	13994	19414	28883	28485
179	citric acid	identified compound	KRKNYBCHXYNGOX-UHFFFAOYSA-N	19782904	620091	273	37754	85:108.0 87:167.0 88:92.0 89:136.0 92:58.0 93:86.0 95:193.0 96:108.0 97:78.0 99:605.0 100:143.0 101:223.0 102:92.0 103:336.0 104:70.0 105:58.0 109:24.0 110:55.0 111:256.0 112:15.0 114:87.0 115:639.0 116:312.0 117:522.0 118:105.0 119:62.0 120:32.0 124:17.0 125:53.0 126:49.0 127:177.0 128:22.0 129:915.0 131:952.0 132:92.0 133:1929.0 134:60.0 135:258.0 136:35.0 137:44.0 139:90.0 140:83.0 141:331.0 1…	100307	1169601	24367	53489	42417	91263	48941	58620	72855	61592	64475	84528	89225	88616	822843	85687	58071	63707	60593	101094	62847	65572	74144	69395	82114	81774	921315	106443	59464	84135	40712	92765	51793	67541	58780	88853	46874	77862	963124	72470	133878
180	citraconic acid	identified compound	HNEGQIOMVPPMNR-IHWYPQMZSA-N	643798	391063	147	128883	87 24.0 89 127.0 91 23.0 94 115.0 95 130.0 96 55.0 97 1633.0 98 564.0 99 707.0 101 136.0 103 300.0 104 81.0 105 186.0 107 30.0 108 54.0 109 47.0 110 51.0 111 85.0 112 419.0 113 251.0 114 106.0 115 218.0 119 144.0 120 41.0 121 44.0 122 720.0 123 124.0 124 59.0 125 120.0 127 324.0 128 42.0 129 79.0 131 256.0 132 25.0 133 1452.0 134 231.0 135 59.0 136 49.0 138 25.0 139 36.0 140 438.0 141 549.0 142 1…	9856	10765	8182	5730	7153	9143	12046	10194	12747	7586	11177	10983	8349	11521	12407	9664	13014	12838	14814	18889	8858	8830	12722	17363	15259	10110	14983	12611	25921	16300	15442	14657	14499	12330	16487	14927	12348	14062	14834	15774	15411
181	cholesterol	identified compound	HVYWMOMLDIMFJA-DPAQBDIFSA-N	5997	1076014	129	87943	85:10145.0 86:1203.0 87:1832.0 88:723.0 89:6644.0 90:1153.0 91:78364.0 92:13956.0 93:58070.0 94:11396.0 95:77285.0 96:6765.0 97:16725.0 98:1574.0 99:4571.0 100:554.0 101:8272.0 102:1830.0 103:8723.0 104:4368.0 105:68934.0 106:14571.0 107:52652.0 108:10693.0 109:32688.0 110:4633.0 111:10017.0 112:1057.0 113:3097.0 114:830.0 115:14461.0 116:7208.0 117:25953.0 118:8439.0 119:52382.0 120:25231.0 121:…	8056	4583	4965	2127	3906	2027	3886	3283	5400	3194	4815	6183	3567	8746	4998	3427	3245	4252	6495	4162	3695	5418	3857	6340	3541	7423	4745	6429	4885	8299	3424	3753	7374	3071	4697	4455	3891	8502	6736	5580	6237
182	cellobiose	identified compound	GUBGYTABKSRVRQ-QRZGKKJRSA-N	10712	943858	160	16601	85 424.0 86 76.0 87 169.0 88 161.0 89 4008.0 90 391.0 91 438.0 92 82.0 95 173.0 96 344.0 97 791.0 98 171.0 99 410.0 100 998.0 101 1517.0 102 989.0 103 10221.0 104 1108.0 105 1717.0 106 161.0 107 163.0 108 20.0 109 431.0 110 194.0 111 328.0 112 17.0 113 564.0 114 484.0 115 793.0 116 616.0 117 7803.0 118 721.0 119 664.0 120 249.0 121 132.0 122 61.0 123 80.0 124 9.0 125 126.0 127 102.0 128 193.0 129…	2547	3167	2048	2284	5147	4120	3207	279	423	1263	4457	2525	3024	2623	920	406	2025	2212	2377	2156	1415	1822	1811	4167	2740	2012	2475	3264	2396	3941	2334	2577	2514	2078	1638	2038	5017	1755	1594	1901	1882
183	capric acid	identified compound	GHVNFZFCNZKVNT-UHFFFAOYSA-N	2969	452386	229	50422	85:361.0 86:211.0 87:97.0 88:188.0 89:198.0 91:72.0 92:53.0 93:28.0 95:596.0 97:211.0 98:268.0 99:154.0 100:272.0 101:339.0 102:103.0 105:195.0 107:56.0 108:74.0 109:24.0 111:141.0 112:93.0 115:176.0 116:533.0 117:8029.0 118:528.0 119:291.0 122:50.0 123:33.0 125:55.0 126:57.0 129:3117.0 130:404.0 131:2042.0 132:1733.0 133:413.0 134:170.0 136:42.0 138:29.0 139:27.0 143:208.0 145:657.0 150:34.0 152…	5143	4776	4102	3102	5450	2546	3905	4787	4418	3872	4230	4295	1713	2194	5388	5840	3656	1718	4356	5819	2106	1705	1582	5774	2516	1789	4378	1543	4350	2460	4271	2413	4864	1595	1601	2461	4118	4627	5606	4478	1763
184	beta-mannosylglycerate	identified compound	DDXCFDOPXBPUJC-SAYMMRJXSA-N	5460194	775654	204	16886	87 165.0 89 142.0 95 26.0 98 135.0 99 61.0 100 61.0 101 609.0 103 1493.0 109 16.0 113 92.0 114 72.0 116 327.0 117 1271.0 118 90.0 119 184.0 121 140.0 129 1373.0 130 253.0 131 326.0 133 779.0 134 207.0 141 19.0 143 1202.0 144 115.0 145 80.0 147 3623.0 150 77.0 155 157.0 157 234.0 160 152.0 161 343.0 162 2.0 163 86.0 169 403.0 170 2.0 172 3.0 175 91.0 176 3.0 177 614.0 178 3.0 179 20.0 181 18.0 182…	95550	21049	88240	34260	30613	32193	103657	31895	30535	41836	46949	30639	35203	103673	84725	32111	28746	52548	48501	64413	34687	32036	70107	35663	83393	123539	64004	34837	50918	90681	48604	52538	41949	46375	77021	159817	47409	139868	74572	68354	53080
185	beta-alanine	identified compound	UCMIRNVEIXFBKS-UHFFFAOYSA-N	239	435564	248	148	85:228.0 86:3117.0 87:240.0 90:32.0 93:32.0 95:19.0 99:386.0 100:1891.0 101:337.0 102:313.0 103:237.0 104:118.0 107:63.0 113:116.0 114:91.0 117:236.0 119:17.0 120:39.0 129:105.0 130:635.0 133:1533.0 134:301.0 135:92.0 137:24.0 142:51.0 146:224.0 147:2196.0 148:431.0 160:346.0 161:56.0 162:41.0 164:29.0 168:16.0 170:19.0 172:67.0 173:3.0 174:3380.0 175:583.0 176:292.0 181:27.0 187:19.0 188:94.0 18…	785	826	1293	535	550	678	242	415	501	476	751	439	722	662	969	678	548	962	836	563	653	454	997	854	917	779	1081	799	2657	1060	882	871	773	674	906	871	906	798	1588	1770	1148
186	benzoic acid	identified compound	WPYMKLBDIGXBTP-UHFFFAOYSA-N	20144841	339067	179	36	86:343.0 87:342.0 88:702.0 89:324.0 90:144.0 91:469.0 93:84.0 95:73.0 98:224.0 101:459.0 102:419.0 103:2363.0 105:19922.0 106:1506.0 107:541.0 108:41.0 109:28.0 115:81.0 116:11012.0 117:1187.0 118:403.0 119:326.0 120:194.0 121:192.0 128:258.0 130:1267.0 131:785.0 132:5944.0 133:1178.0 134:622.0 135:12484.0 136:1522.0 137:356.0 139:52.0 144:953.0 146:581.0 149:399.0 158:68.0 159:237.0 160:66.0 161…	17165	181935	21075	8259	9963	59839	8263	9334	8836	10891	11279	7037	8792	12379	123150	10078	8833	10399	13301	18900	15207	9176	10053	14586	14855	12994	195911	15043	9721	16222	7908	12756	10480	9983	8714	17314	9601	9582	133204	13522	12895
188	aspartic acid	identified compound	CKLJMWTZIZZHCS-REOHCLBHSA-N	44367445	480387	232	79	87:91.0 96:51.0 97:57.0 98:86.0 99:100.0 100:3071.0 101:325.0 102:140.0 103:85.0 115:76.0 117:579.0 118:67.0 129:72.0 130:177.0 132:82.0 133:399.0 134:83.0 142:92.0 147:1028.0 148:289.0 149:74.0 160:33.0 163:47.0 164:28.0 173:22.0 174:51.0 188:319.0 189:76.0 190:42.0 202:314.0 203:31.0 204:79.0 216:94.0 218:511.0 219:116.0 220:18.0 232:2572.0 233:417.0 234:183.0 235:21.0 267:39.0 291:15.0 306:42.…	9700	19339	5537	5437	4183	4064	4141	1534	2094	4841	4455	2592	4400	5186	7200	2214	3421	2674	3603	3281	2224	7069	2560	6975	3218	7326	6939	3060	5526	3769	3526	3342	2375	3005	3012	3738	5175	4277	7425	2880	1960
191	aspartate	identified compound	CKLJMWTZIZZHCS-REOHCLBHSA-N	44367445	433075	160	287	85:5334.0 86:16884.0 87:9025.0 88:8023.0 89:7397.0 90:1475.0 91:4174.0 92:680.0 94:75.0 96:664.0 97:569.0 98:6814.0 99:8426.0 100:66510.0 101:14150.0 102:32295.0 103:16868.0 105:3103.0 108:381.0 112:1704.0 113:1453.0 114:2703.0 115:7073.0 116:160980.0 117:214079.0 118:24604.0 119:11009.0 120:787.0 122:75.0 123:322.0 126:1785.0 128:15767.0 129:9946.0 130:242786.0 131:40246.0 132:15596.0 133:27506.…	2187	4727	3715	5670	5481	5060	4006	2424	2440	6822	6294	2427	5609	4348	10788	2384	4531	4407	4447	3734	3397	1954	3869	5758	3546	2266	12388	3579	2206	5529	3130	3827	3514	4241	870	946	5647	4347	13553	3089	3903
193	asparagine	identified compound	DCXYFEDJOCDNAF-REOHCLBHSA-N	6267	523998	159	133945	85:561.0 86:2170.0 87:1169.0 88:484.0 89:598.0 90:699.0 91:254.0 97:3.0 98:614.0 99:770.0 100:3264.0 101:1294.0 102:1346.0 103:1040.0 104:23.0 105:134.0 112:183.0 113:359.0 114:1372.0 115:317.0 116:17513.0 117:2320.0 118:2833.0 119:61.0 120:108.0 123:176.0 124:26.0 125:417.0 126:130.0 127:47.0 128:1873.0 129:2818.0 130:7109.0 131:3869.0 132:2029.0 133:1441.0 134:686.0 135:75.0 141:1078.0 142:1085…	3943	2924	5526	2016	3536	6933	4159	6591	3131	5271	5265	6077	4221	6736	3224	7391	2597	4033	4180	6176	4280	3209	4385	4235	4523	2873	3199	3766	4778	1765	2890	5010	4935	7353	5237	3846	6086	4500	2684	5464	6050
194	asparagine dehydrated	identified compound	DCXYFEDJOCDNAF-REOHCLBHSA-N	6267	476206	100	3209	85:4469.0 86:12556.0 87:3594.0 88:1516.0 89:1312.0 90:149.0 91:114.0 92:132.0 93:379.0 94:76.0 95:185.0 96:457.0 98:8416.0 99:5190.0 100:207096.0 101:22538.0 102:11043.0 103:2114.0 104:541.0 105:883.0 106:257.0 107:259.0 110:668.0 111:600.0 112:1163.0 113:1569.0 114:3425.0 115:131327.0 116:38536.0 117:9926.0 118:2257.0 119:223.0 124:151.0 125:904.0 126:1063.0 127:2647.0 128:86990.0 129:11126.0 13…	3772	2187	2196	804	1549	1166	957	541	1185	869	2237	2394	2697	2853	1822	1090	798	899	1612	1758	2011	4334	1421	1873	1838	5689	2508	2484	7102	1797	3049	1974	1882	2588	1335	2173	2151	446	2753	1977	1181
195	asparagine	identified compound	DCXYFEDJOCDNAF-REOHCLBHSA-N	6267	553743	231	369588	86:261.0 87:142.0 88:87.0 89:283.0 90:151.0 91:43.0 92:46.0 93:35.0 98:167.0 100:1725.0 101:112.0 102:22.0 104:36.0 107:43.0 108:48.0 109:43.0 111:105.0 112:77.0 113:62.0 114:223.0 115:405.0 116:5151.0 117:1014.0 118:309.0 119:90.0 120:36.0 125:136.0 126:95.0 128:266.0 130:448.0 131:829.0 132:2241.0 133:857.0 134:239.0 135:54.0 137:47.0 141:1377.0 142:341.0 143:178.0 144:126.0 145:46.0 146:126.0 …	10213	5937	7337	3837	4633	5580	5329	5268	3641	3251	6369	6188	5162	5176	2670	3181	2919	4092	7196	6401	3869	8550	4546	2323	7572	7234	2386	5101	8873	7640	6243	6636	5198	6468	5436	6544	5718	3490	2949	5515	5092
196	arabitol	identified compound	HEBKCHPVOIAQTA-QWWZWVQMSA-N	94154	572730	103	372446	85 2758.0 86 4683.0 87 26719.0 88 20528.0 89 94804.0 90 8837.0 91 4319.0 92 198.0 93 1522.0 94 1182.0 95 1716.0 96 1028.0 97 4394.0 98 1729.0 99 13063.0 101 82300.0 102 12277.0 103 768966.0 104 72837.0 105 37260.0 106 1894.0 107 887.0 108 631.0 109 712.0 110 1444.0 111 10142.0 112 1314.0 113 15331.0 114 2643.0 115 20427.0 116 31686.0 117 283728.0 118 29774.0 119 27052.0 120 1795.0 121 1501.0 122 …	9023	10139	11867	6256	9727	11425	12203	12837	5605	10149	13868	12615	8507	17473	13534	15386	9853	13505	12147	14864	10483	9498	12326	13392	23530	16187	13440	9434	14021	14940	7507	14938	12225	8568	21783	17668	9401	16501	17048	9333	17118
197	aminomalonate	identified compound	JINBYESILADKFW-UHFFFAOYSA-N	100714	455754	218	413	86:2942.0 88:141.0 89:112.0 91:83.0 95:21.0 96:52.0 99:117.0 100:1404.0 101:500.0 102:258.0 103:262.0 105:161.0 113:119.0 114:63.0 115:110.0 116:295.0 117:454.0 119:188.0 120:63.0 121:40.0 122:45.0 131:1530.0 132:103.0 133:2100.0 134:376.0 143:19.0 144:92.0 147:5888.0 148:433.0 149:305.0 152:37.0 154:11.0 158:171.0 160:45.0 161:81.0 164:29.0 167:17.0 173:76.0 174:1023.0 175:272.0 176:72.0 178:67.…	54677	13728	13151	9071	12060	20711	14715	25079	12546	24112	17831	16931	36371	53381	25074	29801	14185	17943	18370	17986	11636	19329	23945	22041	22573	60324	27746	33318	39278	28243	23463	31846	23692	19927	28006	43953	21733	57613	34698	31902	40001
198	alpha-ketoglutarate	identified compound	KPGXRSRHYNQIFN-UHFFFAOYSA-N	51	507392	198	294	85:208.0 87:154.0 89:4657.0 90:84.0 91:201.0 94:49.0 98:155.0 99:133.0 101:112.0 102:113.0 103:234.0 110:90.0 112:1654.0 113:180.0 114:75.0 115:296.0 118:19.0 125:56.0 126:615.0 128:246.0 129:323.0 131:331.0 133:422.0 135:87.0 142:51.0 143:95.0 144:23.0 145:67.0 147:7768.0 148:1161.0 149:693.0 152:14.0 154:243.0 155:35.0 156:3139.0 157:398.0 158:205.0 159:36.0 160:14.0 161:16.0 163:100.0 170:1125…	2095	8630	271	774	972	1381	2582	1452	1236	1413	1600	1945	1613	213	6275	1945	1437	388	1549	3165	1048	1192	1424	1180	3474	1826	6710	1368	1468	2431	1583	3554	3586	1600	1740	2977	1547	1702	7435	154	2858
199	alloxanoic acid 4tms	identified compound	ZUOHYBVKWBBXDW-UHFFFAOYSA-N	54567015	584472	331	5488	85:90.0 86:216.0 88:12.0 90:29.0 91:60.0 92:647.0 93:31.0 98:94.0 99:71.0 100:928.0 101:142.0 103:181.0 105:46.0 106:30.0 107:34.0 110:73.0 114:97.0 115:268.0 116:505.0 117:248.0 118:33.0 120:196.0 128:88.0 130:65.0 131:771.0 132:188.0 133:599.0 134:186.0 136:10.0 140:42.0 141:51.0 142:42.0 143:25.0 144:271.0 145:19.0 147:2447.0 148:355.0 149:217.0 150:54.0 152:12.0 153:35.0 154:1.0 156:107.0 157…	1343	866	102	515	1079	761	1351	1359	1882	1201	1434	1501	1215	1403	1211	1552	1810	1763	1423	2475	2151	1517	2092	2519	1416	1739	1930	2033	2952	2129	2053	2542	1725	1855	2492	3683	2034	2565	3128	2557	3319
201	alanine TMS3	identified compound	QNAYBMKLOCPYGJ-REOHCLBHSA-N	5950	400164	188	1965	85 814.0 86 1110.0 87 764.0 88 165.0 89 40.0 93 136.0 94 6.0 95 88.0 96 9.0 97 14.0 98 456.0 99 254.0 100 84718.0 101 9437.0 102 4249.0 103 1471.0 104 128.0 105 350.0 107 234.0 110 18.0 111 50.0 112 81.0 113 718.0 114 15924.0 115 3051.0 116 4798.0 117 2665.0 118 495.0 119 757.0 120 102.0 121 28.0 128 348.0 129 249.0 130 3724.0 131 3949.0 132 1077.0 133 9788.0 134 1470.0 135 582.0 138 49.0 140 51.…	750	1066	1650	591	715	678	823	655	845	693	961	780	634	671	1154	669	717	640	776	1026	1301	665	399	763	461	615	488	412	534	410	167	473	694	460	1424	549	406	356	453	1496	719
202	alanine	identified compound	QNAYBMKLOCPYGJ-REOHCLBHSA-N	5950	243971	116	34178	85:333.0 86:2106.0 87:467.0 88:280.0 89:5.0 90:53.0 91:138.0 92:168.0 93:215.0 94:1333.0 95:43.0 96:6.0 98:74.0 99:48.0 100:4652.0 101:1063.0 102:1419.0 103:3674.0 104:501.0 105:328.0 106:3.0 108:75.0 109:236.0 110:175.0 112:94.0 114:926.0 115:860.0 116:84295.0 117:10442.0 118:3671.0 119:545.0 120:126.0 121:65.0 122:38.0 123:90.0 124:32.0 125:42.0 126:107.0 127:278.0 128:1618.0 129:278.0 130:1195…	1606348	2051486	1021275	608245	326484	432548	546303	329439	369564	405955	504538	724706	743466	657378	741229	609476	451766	325710	568486	794583	371100	1268259	621756	638382	924658	1271120	593160	922358	1243185	908214	579912	626862	352156	784562	682464	858943	848591	504660	784182	921074	794056
203	adipic acid	identified compound	WNLRTRBMVRJNCN-UHFFFAOYSA-N	196	474435	111	125	85:2037.0 86:2852.0 87:703.0 88:641.0 89:904.0 90:27.0 91:64.0 92:167.0 93:122.0 94:58.0 95:60.0 96:79.0 97:441.0 99:4029.0 100:405.0 101:502.0 102:524.0 105:259.0 107:59.0 108:26.0 109:187.0 110:362.0 111:58622.0 112:3744.0 113:1086.0 114:171.0 115:1351.0 116:2824.0 117:11244.0 118:1055.0 119:703.0 120:50.0 123:10.0 124:19.0 125:208.0 126:57.0 128:229.0 129:9390.0 130:2687.0 131:1989.0 132:910.0…	2319	10301	2018	2574	2526	6956	2614	3674	2726	2297	2860	2832	2522	2456	3527	3004	3024	2394	2380	5564	3155	2615	1785	3444	3100	2832	12325	2086	3163	4090	2472	2484	2751	1679	1840	3313	3384	2999	3209	1995	2467
204	aconitic acid	identified compound	GTZCVFVGUGFEME-HNQUOIGGSA-N	444212	584528	229	17684	85:823.0 86:194.0 87:662.0 88:337.0 89:711.0 90:119.0 91:200.0 93:1018.0 94:224.0 95:1683.0 96:1733.0 97:6038.0 98:1174.0 99:1242.0 100:178.0 101:600.0 102:310.0 103:1548.0 104:242.0 105:655.0 107:259.0 108:172.0 109:241.0 110:546.0 111:911.0 112:674.0 113:694.0 115:1207.0 116:392.0 117:2280.0 118:273.0 119:1093.0 120:174.0 121:326.0 122:39.0 123:487.0 124:76.0 125:294.0 126:191.0 127:456.0 128:2…	741	3485	172	390	339	308	431	434	447	364	396	561	408	738	2855	424	486	519	428	797	424	477	685	440	818	675	419	744	205	616	620	623	659	526	331	769	717	707	3797	807	811
205	6-deoxyglucose	identified compound	PNNNRSAQSRJVSB-JGWLITMVSA-N	93579	575986	117	342712	85:4325.0 86:4688.0 87:4179.0 88:1250.0 89:24052.0 90:2201.0 92:439.0 98:256.0 99:3563.0 100:13634.0 101:12313.0 102:5785.0 103:10521.0 104:544.0 105:12035.0 111:1629.0 112:1505.0 113:2150.0 114:7746.0 115:10067.0 116:4523.0 117:497385.0 118:53692.0 119:21580.0 125:183.0 126:951.0 127:2880.0 128:1686.0 129:39552.0 130:9114.0 131:30702.0 132:3985.0 133:26739.0 135:1598.0 140:663.0 141:1375.0 142:2…	12868	9533	9925	5929	5735	8117	4784	10618	6837	5988	9351	7881	9446	9988	4981	7755	8685	12472	13494	8778	5953	6197	8346	4573	12366	8738	5276	4886	7174	9772	7276	17037	15267	9745	12217	8343	1904	4489	6818	10723	7311
206	4-hydroxybutyric acid	identified compound	SJZRECIVHVDYJC-UHFFFAOYSA-N	10413	325027	233	85123	85:1473.0 86:1030.0 88:1141.0 90:78.0 97:88.0 99:1509.0 100:534.0 101:1470.0 102:152.0 103:1274.0 104:135.0 105:287.0 109:555.0 110:127.0 111:131.0 113:83.0 115:915.0 116:653.0 117:10011.0 118:922.0 119:717.0 129:821.0 130:174.0 131:930.0 132:466.0 133:1873.0 134:148.0 143:2878.0 144:298.0 147:42121.0 148:6583.0 149:3200.0 150:406.0 151:85.0 157:102.0 187:41.0 192:99.0 204:836.0 205:197.0 222:17.…	1973	2644	1745	1132	1638	1552	1918	1807	1562	2133	2623	1490	1498	2586	1817	2542	2016	2495	1783	1817	1642	2173	2578	3300	1781	2412	1954	1704	2357	2672	1859	3373	2797	2517	2033	2254	2158	3090	3099	1964	2344
212	3,6-anhydro-D-galactose	identified compound	WZYRMLAWNVOIEX-BGPJRJDNSA-N	16069996	588886	231	102714	85:192.0 86:135.0 87:64.0 88:217.0 89:4369.0 90:296.0 91:328.0 92:63.0 93:171.0 94:173.0 95:2021.0 96:291.0 97:94.0 98:608.0 99:333.0 100:613.0 101:2506.0 102:326.0 103:4816.0 104:494.0 105:1735.0 106:197.0 107:96.0 108:60.0 109:30.0 110:66.0 111:435.0 112:245.0 113:287.0 114:68.0 115:458.0 116:580.0 117:2812.0 118:407.0 119:583.0 121:215.0 122:64.0 123:123.0 124:59.0 125:104.0 126:952.0 127:256.…	729	3517	9459	1925	2688	1701	1976	1914	1553	2465	2125	2108	1744	799	2280	1964	1741	1829	1978	1770	2346	1913	1768	2054	2270	827	2683	1972	2022	2125	2066	2427	3207	2372	2253	2434	2076	659	2958	2508	2925
210	3-hydroxybutyric acid	identified compound	WHBMMWSBFZVSSR-UHFFFAOYSA-N	441	278829	191	46	85:131.0 87:1473.0 88:6305.0 89:1090.0 90:120.0 91:68.0 95:57.0 96:101.0 98:187.0 99:1246.0 100:1071.0 101:2671.0 102:480.0 105:239.0 112:38.0 113:234.0 115:3134.0 116:423.0 117:29724.0 118:3054.0 119:1586.0 121:72.0 125:44.0 128:13.0 129:229.0 130:4368.0 131:1815.0 132:261.0 133:5879.0 134:969.0 135:540.0 139:28.0 141:46.0 144:210.0 146:140.0 147:40360.0 148:7485.0 149:5505.0 150:460.0 151:191.0…	74130	79868	207253	54219	103831	52878	723038	203579	576214	64177	129707	35381	190589	115063	105271	58872	49221	76328	80704	119230	31965	37709	17493	42601	33030	107102	104212	31639	34918	24978	24633	73038	114523	14225	53475	94032	39802	105380	119198	37098	26047
223	2,4-diaminobutyric acid	identified compound	OGNSCSPNOLGXSM-UHFFFAOYSA-N	470	441621	100	4953	85:69.0 86:973.0 87:230.0 98:79.0 99:58.0 100:2599.0 101:468.0 102:479.0 103:65.0 107:16.0 110:11.0 113:76.0 114:714.0 115:491.0 116:221.0 117:241.0 118:37.0 119:5.0 127:34.0 128:196.0 129:47.0 130:169.0 131:874.0 132:158.0 133:295.0 134:103.0 141:151.0 142:246.0 143:487.0 144:86.0 146:94.0 147:4357.0 148:566.0 149:307.0 157:98.0 158:206.0 159:10.0 169:167.0 170:100.0 171:102.0 172:104.0 173:41.0…	2297	2256	2747	1432	2738	3118	3008	4242	3106	3952	5368	4367	3589	4816	3849	4409	4418	5564	5760	8257	5221	6014	5459	6420	4032	5252	4835	6205	7464	7759	7764	7960	6986	5440	9157	13194	7732	7422	9447	9148	11789
224	2,3-dihydroxybutanoic acid	identified compound	LOUGYXZSURQALL-UHFFFAOYSA-N	250402	384796	292	31743	87 433.0 88 146.0 89 211.0 95 50.0 101 566.0 102 5460.0 103 1435.0 106 74.0 107 123.0 108 62.0 110 72.0 115 2014.0 116 220.0 117 16374.0 118 1491.0 119 1168.0 123 31.0 124 14.0 129 1092.0 130 2991.0 131 2301.0 132 1136.0 133 5833.0 136 86.0 137 44.0 139 22.0 143 92.0 147 7382.0 148 1170.0 149 1275.0 150 167.0 151 189.0 161 37.0 162 19.0 163 129.0 175 52.0 177 157.0 178 19.0 179 13.0 180 15.0 183 …	2029	1843	1925	1697	2724	1465	1491	1015	994	1274	2057	1070	1036	2382	1623	1052	1640	2317	2606	2879	1985	1041	2024	1373	2208	2121	1770	1715	1233	3437	2595	3055	1042	1701	2431	3357	1572	1893	2022	1722	2050
213	2-piperidinobenzonitrile	identified compound	MEBVSLLKZSAIGK-UHFFFAOYSA-N	2774355	578923	185	90787	85:22.0 86:176.0 96:180.0 100:373.0 101:19.0 102:60.0 110:55.0 113:38.0 116:47.0 127:26.0 130:358.0 141:54.0 142:101.0 144:8.0 156:128.0 157:350.0 158:186.0 170:11.0 173:47.0 185:2641.0 186:497.0 187:121.0 199:58.0 215:56.0 260:13.0 287:47.0 288:13.0 347:2.0 490:13.0 492:3.0	985	1985	259	1009	1493	1670	2659	1424	1723	1942	2467	1714	2499	1566	1272	2203	2131	2367	2316	2669	2626	305	1795	2497	2814	2597	3406	3062	3340	3393	3806	3572	3644	3124	1100	5754	3776	3096	3802	3778	4566
214	2-picolinic acid	identified compound	SIOXPEMLGUPBBT-UHFFFAOYSA-N	1018	381532	180	389051	86:84.0 92:84.0 93:239.0 95:84.0 106:547.0 108:158.0 109:135.0 115:87.0 120:119.0 122:176.0 124:29.0 125:35.0 128:45.0 136:2525.0 137:206.0 138:56.0 142:41.0 148:162.0 150:356.0 151:110.0 152:531.0 153:126.0 157:71.0 166:36.0 167:140.0 180:3764.0 181:391.0 182:142.0 204:31.0 219:28.0 226:18.0 232:21.0 257:32.0 267:68.0 287:53.0 288:18.0 289:25.0 293:23.0 294:25.0 298:27.0 322:15.0 332:14.0 472:15…	1924	276	238	3020	4364	2740	3590	4219	5542	3819	6026	4270	3280	3671	2976	3672	3981	7370	7868	8136	3884	4841	5302	5766	5783	5382	4446	6471	7516	9137	9816	8819	8787	9857	12427	19268	10446	11990	8526	11169	13835
215	2-ketoisocaproic acid	identified compound	BKAJNAXTPSGJCU-UHFFFAOYSA-N	70	310761	89	208	85:129.0 86:213.0 88:136.0 89:5113.0 90:387.0 91:282.0 98:690.0 99:3574.0 100:584.0 101:86.0 103:142.0 104:34.0 105:37.0 110:2780.0 111:140.0 113:196.0 114:693.0 115:2338.0 116:377.0 117:158.0 118:61.0 119:177.0 123:21.0 126:192.0 128:49.0 134:174.0 135:32.0 140:183.0 143:201.0 150:40.0 151:21.0 153:18.0 154:48.0 156:80.0 157:32.0 158:269.0 159:57.0 162:23.0 167:25.0 172:42.0 173:31.0 174:195.0 1…	71818	62269	12208	47542	13503	57903	84679	14147	57168	6429	66623	60500	57607	58592	37123	32014	57781	14972	20011	82034	55953	8390	16667	18565	16872	64677	42661	58934	31541	90714	16864	25325	7488	42096	18984	57079	27339	52653	15786	26197	73629
216	2-hydroxyglutaric acid	identified compound	HWXBTNAVRSUOJR-UHFFFAOYSA-N	43	506306	247	2000	85:987.0 86:115.0 99:30.0 101:119.0 103:121.0 105:91.0 115:9.0 116:84.0 117:39.0 129:3826.0 130:487.0 131:370.0 132:6.0 133:412.0 134:38.0 146:11.0 147:1685.0 148:252.0 149:537.0 150:24.0 157:1113.0 158:97.0 159:129.0 163:13.0 172:4.0 184:12.0 203:612.0 204:140.0 217:9.0 218:20.0 231:219.0 247:1048.0 248:174.0 249:17.0 349:124.0 350:3.0 354:11.0 477:11.0 479:1.0	704	1475	859	817	800	439	666	814	169	635	524	1163	748	325	984	595	974	429	941	1032	557	562	342	562	421	926	1705	771	945	366	522	894	2143	1126	1034	1235	862	451	237	443	774
218	2-hydroxybutanoic acid	identified compound	AFENDNXGAFYKQO-UHFFFAOYSA-N	11266	258161	131	40	86:245.0 87:1207.0 89:112.0 95:545.0 97:102.0 99:553.0 101:976.0 103:517.0 104:78.0 112:23.0 113:68.0 114:20.0 115:1186.0 116:223.0 117:711.0 125:24.0 129:273.0 131:25648.0 132:2895.0 133:3706.0 134:1175.0 137:61.0 138:29.0 139:26.0 143:727.0 144:93.0 145:26.0 147:22332.0 148:3774.0 149:2177.0 150:118.0 151:24.0 169:35.0 175:94.0 184:455.0 189:64.0 190:978.0 191:270.0 192:77.0 195:16.0 205:1662.0…	185718	175104	201050	108910	120183	142334	606940	116803	245824	132859	189493	194879	73746	11003	148479	69711	246378	41820	243893	317482	75527	141859	164694	174516	207657	200538	117015	202416	258602	261380	151168	88489	173315	48606	223748	95844	29438	136330	170071	118337	100567
219	2-deoxytetronic acid	identified compound	DZAIOXUZHHTJKN-UHFFFAOYSA-N	150929	390517	117	4544	85:419.0 87:169.0 88:9.0 95:14.0 99:220.0 100:305.0 101:327.0 102:2888.0 103:526.0 104:147.0 108:46.0 110:120.0 111:15.0 113:79.0 115:450.0 116:85.0 117:6416.0 118:804.0 119:462.0 120:11.0 129:659.0 130:1369.0 131:1144.0 132:137.0 133:1986.0 134:3.0 135:116.0 136:11.0 140:17.0 143:144.0 144:4.0 147:3885.0 148:800.0 149:1025.0 150:109.0 151:56.0 152:17.0 153:775.0 154:23.0 155:13.0 157:37.0 159:3.…	8495	8490	6433	3466	4953	4890	7714	5754	11248	4247	4322	7578	2905	8257	4196	5087	10407	10602	12059	10608	3604	2387	3768	12331	9763	7578	6123	4568	26986	13649	7788	5331	6310	6298	9266	7888	6167	7875	9508	4502	5602
220	2-deoxytetronic acid	identified compound	DZAIOXUZHHTJKN-UHFFFAOYSA-N	150929	433456	189	1208	85:3678.0 86:419.0 87:1070.0 88:693.0 89:3868.0 90:231.0 91:269.0 92:61.0 94:196.0 96:136.0 97:220.0 98:279.0 99:1268.0 100:276.0 101:10175.0 102:1066.0 103:3549.0 104:443.0 105:707.0 106:118.0 107:102.0 108:142.0 109:54.0 111:177.0 112:57.0 113:377.0 114:530.0 115:1621.0 116:869.0 117:12125.0 118:1194.0 119:1640.0 120:183.0 121:154.0 123:18.0 127:243.0 129:6961.0 130:984.0 131:3106.0 132:474.0 1…	1848	2521	3868	1279	1973	1856	1719	704	1374	1632	2079	2491	1947	2691	2339	2163	1457	2362	2791	2594	1253	1415	2309	2424	2492	2361	2635	1998	1985	851	1326	2830	2549	1788	2534	3442	1815	2332	2694	2006	2214
222	2-aminobutyric acid	identified compound	QWCKQJZIFLGMSD-UHFFFAOYSA-N	517460	285825	130	160842	85:2349.0 86:7340.0 87:2626.0 88:1175.0 89:967.0 93:154.0 94:231.0 95:643.0 96:816.0 98:6012.0 99:1182.0 100:17704.0 101:5509.0 102:2953.0 103:8799.0 104:770.0 105:1178.0 107:62.0 109:384.0 111:91.0 112:296.0 113:378.0 114:7166.0 115:3812.0 116:1978.0 117:3932.0 118:356.0 119:558.0 120:162.0 126:773.0 128:1855.0 129:1466.0 130:243176.0 131:34789.0 132:12476.0 133:8893.0 134:1271.0 135:699.0 136:8…	77585	71890	31068	22469	28552	26032	63541	23326	31269	26511	35123	35141	23563	29538	24949	15442	42224	36407	39259	31107	14685	89399	26582	46896	24977	63953	23058	22278	172936	44016	42444	30424	23433	33212	41122	30967	31716	24855	28500	22231	27921
226	1,5-anhydroglucitol	identified compound	MPCAJMNYNOGXPB-SLPGGIOYSA-N	64960	632918	217	171285	85 3071.0 86 461.0 87 660.0 88 778.0 89 4239.0 93 66.0 94 369.0 97 1353.0 98 407.0 99 2106.0 102 1632.0 103 18691.0 104 1497.0 105 1592.0 106 221.0 108 111.0 109 230.0 110 178.0 111 1535.0 112 298.0 114 366.0 115 3648.0 116 3447.0 117 2075.0 118 1333.0 119 1915.0 120 236.0 125 266.0 127 1017.0 128 194.0 129 15313.0 130 2681.0 131 6113.0 132 96.0 133 12489.0 135 1239.0 136 193.0 137 131.0 138 16.0…	287450	325882	314722	166211	196517	177531	6429	342048	254709	379375	355803	303285	280035	256904	275263	224958	221412	207825	240824	220802	147843	243617	367864	283924	445802	242486	290398	155809	331973	371697	313081	296104	347566	373217	334129	288111	342041	231689	338200	313334	222363
227	1,2,4-benzenetriol	identified compound	GGNQRNBDZQJCCN-UHFFFAOYSA-N	10787	521803	239	26704	85:1133.0 87:801.0 88:613.0 89:323.0 90:201.0 91:4251.0 92:550.0 93:2640.0 94:75.0 95:856.0 96:293.0 97:2058.0 98:1945.0 99:1192.0 102:257.0 103:4006.0 104:998.0 105:3856.0 106:458.0 107:1359.0 108:659.0 109:1498.0 110:602.0 111:733.0 112:2965.0 113:841.0 114:144.0 115:1465.0 116:550.0 117:1017.0 118:106.0 119:3737.0 120:807.0 121:962.0 122:372.0 123:430.0 124:258.0 126:4.0 130:103.0 131:2962.0 1…	1218	700	563	718	595	726	699	539	608	736	665	482	637	558	468	424	532	536	539	676	471	403	474	449	461	419	503	534	470	578	606	559	368	541	428	603	475	662	420	610	526
225	1-monostearin	identified compound	VBICKXHEKHSIBG-UHFFFAOYSA-N	24699	959214	203	648	85:2387.0 86:245.0 88:342.0 89:880.0 90:108.0 91:126.0 93:404.0 94:183.0 95:2259.0 96:306.0 97:2167.0 98:609.0 99:768.0 100:91.0 101:4087.0 102:436.0 103:4290.0 104:462.0 105:416.0 106:95.0 107:246.0 108:39.0 109:1410.0 110:130.0 111:1003.0 112:196.0 113:337.0 114:74.0 115:511.0 116:2218.0 117:3517.0 118:444.0 119:328.0 120:48.0 121:179.0 122:22.0 123:677.0 124:97.0 125:278.0 128:153.0 129:4761.0…	192	459	643	538	339	421	473	510	430	395	509	490	737	173	452	330	239	471	854	632	283	229	444	654	429	614	269	404	165	585	302	581	491	467	497	307	378	243	440	261	236
228	2,5-dihydroxypyrazine	identified compound	USHRADXTTYICIJ-UHFFFAOYSA-N	23368901	397526	241	2254	85:168.0 86:172.0 87:115.0 93:14.0 97:710.0 98:27.0 100:66.0 108:4.0 109:15.0 111:179.0 113:419.0 114:172.0 115:562.0 127:101.0 128:126.0 129:169.0 130:13.0 140:38.0 144:10.0 145:499.0 146:11.0 167:155.0 168:17.0 172:5.0 174:1.0 177:4.0 182:157.0 183:31.0 197:1.0 211:11.0 213:6.0 215:3.0 241:1811.0 242:397.0 243:132.0 255:138.0 256:387.0 257:73.0 258:12.0 302:5.0 311:2.0 328:1.0 337:1.0 395:8.0 4…	1202	696	302	488	555	981	645	784	741	771	1013	876	1059	1161	526	1130	781	1033	1005	1366	1042	779	1194	1204	1125	1428	1133	1155	1356	1150	988	1364	776	937	1576	2022	1291	1338	785	1291	1229
229	408464	unidentified compound			441091	167	408464	90 232.0 91 2028.0 94 206.0 97 817.0 99 320.0 100 653.0 102 546.0 105 96.0 113 55.0 114 95.0 115 288.0 116 198.0 117 313.0 118 144.0 119 69.0 125 255.0 128 900.0 129 342.0 130 544.0 135 328.0 137 110.0 140 31.0 141 332.0 145 162.0 154 104.0 158 348.0 167 3576.0 171 294.0 172 51.0 180 234.0 182 48.0 185 112.0 186 602.0 188 42.0 196 364.0 214 732.0 215 289.0 218 674.0 219 104.0 220 62.0 223 47.0 22…	207	334	167	292	190	274	239	386	314	323	381	252	355	346	302	336	327	345	200	737	540	346	507	388	269	381	526	409	458	585	808	661	603	673	607	775	557	853	806	586	594
230	408462	unidentified compound			760304	315	408462	85 2082.0 86 1540.0 87 854.0 88 710.0 90 44.0 91 242.0 94 1621.0 95 1825.0 96 1755.0 97 1367.0 98 1265.0 99 1544.0 100 1134.0 101 1246.0 102 951.0 104 38.0 106 322.0 107 1086.0 108 505.0 109 472.0 110 193.0 111 449.0 112 1077.0 113 839.0 114 1164.0 115 987.0 116 1568.0 117 228.0 119 581.0 120 157.0 121 1431.0 123 24.0 124 331.0 125 773.0 126 532.0 127 933.0 128 1583.0 129 957.0 130 1444.0 132 417…	1362	1375	418	1722	3450	2829	4290	3382	5034	3541	5533	4635	5591	5202	4157	3792	4269	5524	6279	9642	4750	6051	7932	7802	6702	5672	5000	7787	7545	8104	5555	5619	7785	7528	7725	10971	7266	6085	5849	9010	8429
231	408460	unidentified compound			546057	280	408460	85 772.0 87 261.0 88 233.0 92 1747.0 97 121.0 98 246.0 100 562.0 103 1073.0 110 1372.0 111 445.0 115 286.0 118 122.0 119 2305.0 120 368.0 125 454.0 126 128.0 128 429.0 129 294.0 131 459.0 133 884.0 134 357.0 135 336.0 138 404.0 140 188.0 141 310.0 144 447.0 145 408.0 147 1855.0 149 1143.0 151 136.0 153 289.0 154 278.0 155 541.0 163 306.0 164 482.0 165 89.0 166 61.0 170 296.0 172 852.0 174 229.0 1…	493	1588	1518	1875	407	534	562	676	1784	582	1609	647	564	827	1066	624	1624	731	822	1355	1811	1591	1199	1924	1001	1059	999	1932	2294	1807	2091	2013	1671	1829	2093	1915	2280	1103	1339	2030	2230
232	408459	unidentified compound			587690	200	408459	87 4674.0 89 1098.0 90 1218.0 91 2668.0 93 1074.0 94 1303.0 95 108.0 96 8278.0 97 4587.0 98 944.0 99 1576.0 102 12043.0 103 10716.0 105 2172.0 106 491.0 107 1073.0 108 240.0 112 216.0 113 862.0 114 534.0 117 2110.0 118 869.0 121 3205.0 122 810.0 123 93.0 124 188.0 125 292.0 126 251.0 128 1313.0 129 620.0 131 8298.0 132 3394.0 135 432.0 141 133.0 142 139.0 143 2090.0 145 2740.0 146 984.0 148 7127.…	4044	3733	1923	2649	4047	3450	5004	5692	3324	4919	6044	5107	3737	5426	3844	6948	5571	4818	6042	8368	7383	5703	6170	6191	4402	7795	7674	5824	7520	9989	8339	11670	10226	7662	11435	14343	7384	10643	12034	11814	14370
233	408453	unidentified compound			504392	99	408453	85 2840.0 86 2440.0 87 1898.0 88 2794.0 89 5393.0 90 1984.0 93 692.0 94 276.0 95 494.0 96 669.0 97 1432.0 98 226.0 99 117511.0 100 12263.0 101 1510.0 102 2407.0 103 9121.0 104 1278.0 106 955.0 107 441.0 109 185.0 110 2218.0 111 1108.0 112 2164.0 113 1206.0 114 196.0 115 484.0 116 2805.0 117 351.0 122 786.0 124 86.0 126 619.0 129 747.0 131 4497.0 132 702.0 133 4944.0 134 1120.0 135 154.0 136 590.0…	3992	2839	4532	3678	5983	4627	7416	6535	4396	6549	8268	6655	4365	6206	6404	5647	3894	8144	10886	10393	6783	6903	5545	6282	5456	8437	7017	1546	8514	9431	10621	2785	11682	8641	1077	15607	13693	12074	16456	8355	14963
234	408452	unidentified compound			406676	214	408452	85 508.0 86 3273.0 87 1381.0 88 1479.0 89 1609.0 90 975.0 91 1053.0 93 441.0 97 492.0 98 3542.0 99 1773.0 100 6956.0 102 5347.0 103 2614.0 104 1244.0 105 1392.0 108 204.0 109 214.0 110 1409.0 115 1991.0 116 2091.0 117 2814.0 118 1281.0 119 1111.0 120 739.0 121 1372.0 122 792.0 123 118.0 127 275.0 129 748.0 130 8348.0 131 2886.0 132 2392.0 133 3768.0 134 5756.0 135 1208.0 136 849.0 138 196.0 140 2…	1616	1476	309	876	1518	1182	1665	2353	1032	1979	1925	1746	1288	2085	1777	1883	1601	1479	1390	2313	2215	2218	1582	2706	1541	2056	2611	2498	2487	2727	3014	3041	2555	2433	3225	3839	2481	2576	3190	2861	3639
235	408450	unidentified compound			222241	100	408450	86 2652.0 87 2113.0 88 2423.0 90 5020.0 91 7644.0 96 4593.0 98 4355.0 99 3835.0 100 50590.0 107 3187.0 109 3912.0 111 6405.0 112 1389.0 114 1764.0 115 35448.0 116 5333.0 123 718.0 125 874.0 128 1317.0 129 592.0 131 69405.0 132 23997.0 133 6295.0 134 32159.0 136 5442.0 137 933.0 139 45.0 145 365.0 146 908.0 147 90020.0 148 13125.0 151 199.0 160 382.0 162 232.0 163 83.0 167 1971.0 168 10393.0 169 2…	119283	91015	75878	37010	83675	98264	82063	76274	72296	89414	101774	83281	79205	94668	78976	78198	85915	98036	104250	147221	87685	96225	106789	123453	113715	92593	87175	104162	106492	153784	102084	98915	91257	92561	99828	137474	100482	99126	112037	103897	106835
236	408449	unidentified compound			569170	121	408449	86 153.0 87 3011.0 88 2858.0 89 2576.0 91 820.0 92 341.0 96 116.0 102 104.0 104 605.0 105 281.0 106 438.0 107 84.0 110 346.0 111 84.0 115 593.0 118 1293.0 119 352.0 120 1789.0 121 14155.0 122 1679.0 123 664.0 124 119.0 126 38.0 128 789.0 130 467.0 132 95.0 133 1328.0 134 1195.0 135 519.0 136 263.0 142 888.0 143 787.0 144 350.0 145 220.0 147 2636.0 148 915.0 149 349.0 150 492.0 151 28.0 152 414.0 …	1432	1788	815	915	1023	1310	946	1037	1290	1222	1374	1031	1053	1500	1739	1413	1108	1409	1258	1145	1657	1217	1726	1324	1051	1820	1515	1369	1582	1551	1412	1934	1917	1684	2089	2852	1486	2401	1855	1614	2019
237	408448	unidentified compound			341857	115	408448	87 782.0 89 1462.0 90 698.0 96 2503.0 103 6196.0 104 13335.0 106 837.0 112 557.0 115 15975.0 120 2782.0 122 283.0 131 8825.0 132 632.0 138 141.0 139 149.0 144 542.0 145 709.0 146 162.0 147 14919.0 148 5880.0 150 671.0 152 123.0 154 126.0 155 112.0 160 817.0 161 176.0 168 53907.0 169 8410.0 170 2357.0 188 25.0 219 1929.0 221 1052.0 223 179.0 230 165.0 235 51.0 238 161.0 239 47.0 242 2961.0 243 860…	30759	5971	27209	3603	132124	2337	126817	142785	582	2809	1915	4040	3670	30720	129856	165116	141699	153209	3371	195344	122983	7477	4282	7308	136982	5620	167020	5669	6261	3415	3135	3929	128769	139096	2995	196610	4374	30278	172025	4227	182683
238	408446	unidentified compound			624095	157	408446	85 1022.0 86 423.0 87 1138.0 89 3324.0 95 158.0 97 449.0 98 136.0 99 1419.0 101 3518.0 102 924.0 103 12596.0 104 1243.0 105 2026.0 111 1254.0 112 122.0 113 1288.0 114 525.0 115 1301.0 116 968.0 117 8569.0 118 773.0 119 1294.0 125 136.0 127 661.0 129 8983.0 130 1039.0 131 4648.0 132 796.0 133 9493.0 134 1381.0 135 584.0 137 71.0 142 788.0 143 3071.0 144 541.0 147 35811.0 148 5494.0 149 4530.0 150 …	21162	2806	10065	2314	3686	2947	19912	3719	3756	4145	5340	4497	4847	18257	9318	2604	3535	4158	4731	3849	3609	3449	6890	3832	9681	21383	7402	5485	4197	6924	4574	5250	3750	5409	6082	16693	3832	20488	8623	6351	2893
239	408434	unidentified compound			205657	156	408434	85 3277.0 86 2393.0 87 689.0 93 3379.0 95 1777.0 98 577.0 99 624.0 100 3411.0 101 1967.0 102 1075.0 103 3101.0 112 3579.0 113 574.0 114 825.0 116 1650.0 117 4090.0 118 376.0 125 1718.0 126 1492.0 127 136.0 128 3903.0 129 1924.0 130 724.0 131 155.0 132 221.0 138 280.0 141 74.0 142 1047.0 143 180.0 145 165.0 146 639.0 148 436.0 155 227.0 156 9401.0 157 956.0 158 214.0 159 49.0 160 337.0 161 107.0 1…	na	na	na	na	na	na	na	na	na	na	na	na	na	na	na	na	na	na	na	na	na	na	na	na	na	na	na	na	na	na	na	na	na	na	na	na	na	na	na	na	na
240	408429	unidentified compound			855903	174	408429	85 1085.0 89 1179.0 95 250.0 96 821.0 102 1729.0 103 4491.0 104 686.0 107 352.0 112 371.0 114 204.0 116 2822.0 117 1172.0 118 396.0 124 353.0 126 88.0 128 1186.0 129 313.0 130 1149.0 133 509.0 134 157.0 138 62.0 139 283.0 140 117.0 141 77.0 143 472.0 144 2059.0 146 828.0 147 5080.0 148 371.0 152 81.0 154 77.0 157 288.0 158 1284.0 159 225.0 160 604.0 161 306.0 163 248.0 167 36.0 171 1866.0 172 196…	1174	1419	247	921	1546	1660	2767	2061	2166	2553	3171	2757	1963	3734	3700	1560	3495	2873	4358	4733	3136	2351	261	4918	5767	3941	4204	3184	3997	4557	4178	4737	5115	4431	5170	9897	6661	5808	6329	6923	6790
241	408428	unidentified compound			515039	171	408428	85 1587.0 86 495.0 88 198.0 89 129.0 94 135.0 96 515.0 97 82.0 98 702.0 99 1906.0 101 379.0 108 125.0 109 105.0 110 370.0 111 121.0 112 845.0 113 1244.0 114 191.0 115 458.0 117 399.0 120 145.0 124 185.0 125 97.0 126 650.0 128 420.0 129 386.0 132 552.0 133 653.0 134 588.0 135 267.0 136 172.0 137 99.0 138 163.0 140 339.0 141 203.0 142 9531.0 143 1386.0 145 255.0 147 5218.0 150 180.0 154 1389.0 155 …	2873	1625	1274	1243	1995	2535	1607	1700	1417	2024	3287	2207	2336	3258	2212	2145	1747	2440	3402	3762	1770	1784	2547	2968	2426	2948	723	2465	2064	4127	1638	3220	3127	2550	3418	4949	3500	1702	1112	3756	4635
242	408427	unidentified compound			848269	290	408427	85 384.0 86 1668.0 88 728.0 89 723.0 100 1030.0 102 341.0 103 9433.0 104 1228.0 105 655.0 110 312.0 112 409.0 113 390.0 114 444.0 115 415.0 116 1620.0 117 1507.0 118 524.0 122 178.0 124 138.0 125 188.0 126 103.0 127 227.0 130 1009.0 131 651.0 133 747.0 135 477.0 137 179.0 141 409.0 142 224.0 143 592.0 144 2854.0 145 378.0 146 281.0 147 4142.0 148 622.0 149 380.0 150 277.0 151 270.0 154 130.0 155 …	6158479	6265006	22508	4499751	5601403	5458032	6584183	6064123	5621926	5937097	6326094	5892310	5859467	6186996	5908262	5257347	5400810	5789569	6023138	6481555	4716761	5605303	6338283	6236017	6186874	6014890	5896065	5326816	5650516	6489757	5257146	6039422	6002350	5367721	5388305	6686263	5527364	5646435	6018822	6027093	5785414
243	408426	unidentified compound			493360	184	408426	88 560.0 91 347.0 94 931.0 95 681.0 97 572.0 98 121.0 100 1974.0 101 2615.0 102 1566.0 103 875.0 106 3807.0 107 125.0 108 161.0 109 565.0 110 3588.0 112 263.0 113 611.0 115 638.0 117 1004.0 118 64.0 119 172.0 121 439.0 123 1060.0 124 247.0 126 480.0 128 800.0 129 1298.0 130 396.0 131 813.0 134 2935.0 135 632.0 136 1030.0 137 73.0 138 226.0 141 559.0 143 164.0 146 252.0 147 5789.0 148 625.0 149 10…	965	519	302	599	885	642	621	1047	769	888	892	765	1016	1444	780	896	992	1075	1227	1210	748	1195	1049	1347	1744	1966	1552	1467	1094	1512	1664	3229	2392	1719	2613	2195	2726	2901	1809	2356	2114
244	408424	unidentified compound			243102	91	408424	87 9391.0 90 7072.0 91 25221.0 92 1172.0 93 1215.0 95 184.0 96 4219.0 99 504.0 103 9236.0 104 7965.0 105 7091.0 106 2848.0 107 789.0 108 213.0 115 1715.0 119 10259.0 120 126705.0 121 9656.0 122 2064.0 123 1001.0 131 2479.0 135 1329.0 161 197.0 172 179.0 176 196.0 177 590.0 193 372.0 194 5204.0 195 2784.0 196 1083.0 197 163.0 203 51.0 216 33.0 222 1793.0 224 204.0 404 12.0	21463	31353	19263	15192	17407	21231	22361	24290	18734	24434	29084	23007	23627	29469	25702	40787	19322	23293	30969	34668	22625	27122	29789	24219	23335	30997	29444	22138	22107	39687	24718	41020	33579	36866	36057	28625	34761	36907	50251	36558	43790
245	408422	unidentified compound			315994	215	408422	85 371.0 86 616.0 88 151.0 90 36.0 92 639.0 94 75.0 95 76.0 97 540.0 98 855.0 99 365.0 104 499.0 105 330.0 106 561.0 107 141.0 108 316.0 109 403.0 115 157.0 116 257.0 117 165.0 120 1164.0 121 336.0 122 52.0 123 821.0 124 85.0 125 334.0 128 357.0 131 845.0 132 2429.0 136 419.0 137 84.0 142 403.0 143 472.0 144 1155.0 145 132.0 153 42.0 154 231.0 155 29.0 156 259.0 168 119.0 169 49.0 170 96.0 172 56…	5970	5886	4899	12554	10805	11254	9062	10757	11888	9136	11280	11878	12410	6095	5138	13782	13803	9715	13016	12693	13552	10630	13983	13174	12975	4567	4239	14113	10648	11401	13448	11536	11996	15490	8508	10755	14214	5417	6185	11441	12001
246	408327	unidentified compound			454895	236	408327	86 2321.0 87 3343.0 90 780.0 93 93.0 96 247.0 100 7336.0 101 2563.0 104 10194.0 105 1438.0 106 225.0 108 150.0 110 121.0 113 8.0 114 260.0 117 3271.0 118 572.0 119 602.0 120 1343.0 121 1079.0 124 69.0 129 127.0 131 6091.0 133 8389.0 134 3397.0 135 885.0 138 19.0 139 398.0 147 43048.0 148 8048.0 149 4578.0 150 998.0 152 92.0 153 82.0 157 139.0 164 1574.0 165 367.0 167 103.0 169 60.0 170 18.0 171 4…	63297	4825	9665	18431	15446	12476	27382	20320	16503	19090	21951	15500	18055	50693	16794	15545	13999	22744	20966	24512	14570	12251	21074	14895	28371	64038	13891	13352	22271	20856	26203	20111	15109	22881	26184	35165	19911	50442	17883	20714	21522
247	408303	unidentified compound			494675	212	408303	89 549.0 90 614.0 100 2217.0 101 870.0 102 449.0 103 2571.0 104 3212.0 105 720.0 109 130.0 110 176.0 117 864.0 118 257.0 119 739.0 120 424.0 121 58.0 122 326.0 123 155.0 124 92.0 128 221.0 130 316.0 131 676.0 132 1278.0 133 1807.0 134 618.0 135 236.0 136 188.0 142 369.0 145 411.0 147 5625.0 148 1393.0 149 469.0 150 331.0 151 199.0 152 509.0 153 88.0 158 422.0 163 230.0 165 194.0 166 100.0 167 716…	4072	337	817	1826	2806	2581	2403	2686	1815	3380	4198	2360	1965	6436	2269	3739	2053	2840	3496	3877	2183	791	3818	3288	3389	4909	2093	1581	1511	4708	2054	3359	2805	3627	3962	5907	3434	8152	2703	2863	4696
248	408285	unidentified compound			412764	146	408285	85 753.0 87 714.0 89 128.0 91 1408.0 93 265.0 96 172.0 99 182.0 100 1941.0 101 493.0 102 12299.0 103 5083.0 104 931.0 105 212.0 107 86.0 115 685.0 117 309.0 118 798.0 119 2227.0 120 117.0 129 458.0 130 2544.0 131 1013.0 132 306.0 133 1198.0 141 102.0 143 440.0 145 140.0 146 10642.0 147 5708.0 148 676.0 149 756.0 155 156.0 157 779.0 158 718.0 159 207.0 163 120.0 169 136.0 171 281.0 174 60.0 175 14…	1274	957	261	521	862	828	995	1071	866	1144	1310	1375	982	1265	1091	1227	1074	1328	1319	2243	1626	1128	1907	1975	1288	899	1919	1738	1504	2144	1874	2201	2196	1886	2490	3532	1870	2350	2493	2294	2742
249	408279	unidentified compound			879562	290	408279	86 163.0 89 284.0 91 1109.0 101 96.0 103 2037.0 107 132.0 114 68.0 116 127.0 126 72.0 128 133.0 130 93.0 134 153.0 139 101.0 144 733.0 153 47.0 155 202.0 156 674.0 157 187.0 166 160.0 168 114.0 169 88.0 171 48.0 173 140.0 180 175.0 182 203.0 183 63.0 186 73.0 187 75.0 188 34.0 194 187.0 195 78.0 196 63.0 201 71.0 208 229.0 209 282.0 216 37.0 226 49.0 231 32.0 232 929.0 233 314.0 234 237.0 238 71.…	1003	991	273	670	920	1207	1212	614	716	1388	1455	806	1763	2016	744	1621	1240	1272	1691	2406	1369	1185	750	1479	1534	2100	1371	2271	1405	1666	1386	1657	1382	1782	1991	3571	2102	2115	1959	2793	2941
250	408278	unidentified compound			823698	295	408278	85 291.0 88 438.0 89 1346.0 90 394.0 91 689.0 92 498.0 101 1625.0 102 642.0 103 3505.0 104 1061.0 105 3264.0 106 342.0 111 306.0 112 87.0 113 578.0 114 258.0 115 298.0 117 3016.0 118 622.0 119 386.0 125 101.0 129 4434.0 130 1027.0 131 1683.0 132 539.0 133 3155.0 134 625.0 135 347.0 136 108.0 139 162.0 141 302.0 143 1111.0 146 458.0 147 11169.0 148 2279.0 149 1921.0 150 291.0 151 269.0 154 101.0 1…	4397	592	781	1582	1472	1420	4415	1663	1751	1803	2238	1251	1148	4705	2302	1154	1305	2484	2430	3588	1296	1203	2684	1733	2594	6015	1669	1328	2388	3268	2059	2386	1297	1560	2850	5780	1872	6476	1964	2511	1811
251	408252	unidentified compound			682745	316	408252	86 1958.0 87 905.0 94 391.0 96 804.0 97 1119.0 98 12903.0 99 960.0 100 7367.0 101 9192.0 102 646.0 104 1023.0 106 420.0 108 521.0 109 274.0 110 2197.0 111 652.0 112 1043.0 114 693.0 120 339.0 122 146.0 123 185.0 124 687.0 126 912.0 127 1044.0 131 4236.0 132 1829.0 134 6384.0 135 1105.0 136 402.0 137 449.0 138 2189.0 139 703.0 140 736.0 141 507.0 147 26783.0 148 5065.0 149 2121.0 151 632.0 152 786…	8631	517	1723	3208	2898	2440	5215	1715	2062	2735	3277	2108	2863	8630	2528	2795	2400	3487	3403	3718	2356	1869	3329	2854	5758	10713	1891	2154	3832	4637	3283	3321	3108	2868	4424	7990	3039	10394	2387	3157	3016
252	408248	unidentified compound			720447	160	408248	85 207.0 86 3345.0 87 1710.0 88 1378.0 89 1749.0 93 72.0 98 904.0 99 311.0 100 5123.0 101 1711.0 102 1027.0 103 1566.0 104 656.0 105 277.0 108 49.0 111 64.0 113 1000.0 114 2516.0 116 1543.0 117 7349.0 118 2041.0 119 997.0 120 449.0 121 75.0 124 167.0 129 678.0 130 1475.0 131 4542.0 132 4275.0 133 5947.0 134 1116.0 135 948.0 136 356.0 137 153.0 143 1257.0 144 1581.0 146 400.0 147 30687.0 148 9445.…	20461	1709	4550	7217	6276	4953	12513	5481	5011	5762	6190	4159	5997	19162	7126	6350	4943	7352	7551	8176	5213	4583	7172	5808	9936	22865	5046	4467	7860	9247	7862	7622	6597	6386	8679	15094	5547	21411	6762	5203	6318
253	408228	unidentified compound			553139	323	408228	86 739.0 88 802.0 90 501.0 92 201.0 95 150.0 98 232.0 100 2666.0 101 2464.0 103 622.0 104 371.0 105 1940.0 106 199.0 114 236.0 116 2601.0 117 1668.0 127 81.0 130 469.0 131 1608.0 132 913.0 133 3046.0 134 629.0 140 174.0 141 158.0 145 1940.0 146 526.0 147 20656.0 148 4130.0 149 1394.0 150 237.0 151 141.0 157 230.0 159 584.0 160 150.0 161 1195.0 164 1071.0 165 186.0 167 57.0 169 27.0 172 317.0 174 …	13525	1014	1699	3500	2920	2463	4160	2904	3155	2880	3210	3058	2769	12135	2387	2929	3305	4594	3171	3756	2682	2745	3204	4189	5236	13728	2070	3131	3864	4259	3743	4711	1142	4011	4397	7565	3312	12954	2692	4024	4162
254	408209	unidentified compound			798227	213	408209	85 520.0 86 2350.0 87 712.0 88 1410.0 89 1234.0 90 227.0 91 162.0 94 125.0 95 421.0 97 242.0 98 948.0 99 373.0 100 1151.0 101 1518.0 102 1359.0 103 3249.0 104 414.0 108 312.0 109 167.0 110 147.0 111 853.0 112 555.0 113 514.0 114 636.0 115 476.0 116 2439.0 117 3924.0 118 407.0 119 278.0 123 119.0 124 81.0 126 70.0 127 265.0 128 607.0 129 718.0 130 2098.0 131 719.0 132 684.0 133 894.0 134 157.0 135…	973	381	553	836	1196	1349	2548	1770	2153	2026	1888	1779	1509	1356	462	2005	1001	506	2845	3449	1154	2278	2450	2429	1459	1274	620	2092	1879	1199	1690	2026	1438	1195	1911	2994	1912	1510	817	7196	7613
255	408204	unidentified compound			825274	274	408204	86 527.0 88 339.0 90 32.0 91 604.0 93 104.0 94 307.0 95 277.0 96 174.0 97 341.0 99 140.0 100 317.0 102 153.0 103 5321.0 104 328.0 105 337.0 107 142.0 110 90.0 113 171.0 115 608.0 116 384.0 117 647.0 118 289.0 119 173.0 120 50.0 123 45.0 126 47.0 128 1655.0 129 536.0 130 491.0 131 270.0 133 415.0 137 88.0 140 83.0 142 725.0 143 456.0 144 638.0 146 243.0 147 1857.0 148 362.0 149 316.0 152 87.0 153 …	523	505	684	827	1324	1556	2375	2072	1608	2010	2925	3101	3440	2955	3013	2746	2491	3124	3810	4300	3735	4263	4342	4476	4371	3371	4188	4415	5270	5165	4830	5527	5273	5602	6322	6177	5677	4932	5774	6041	6402
256	408014	unidentified compound			746283	229	408014	85 2051.0 86 1167.0 88 2377.0 96 585.0 97 3682.0 98 23672.0 99 2119.0 100 622.0 101 1895.0 102 235.0 103 2566.0 104 121.0 105 240.0 109 194.0 110 807.0 111 10053.0 112 2418.0 113 348.0 114 341.0 116 1668.0 117 2385.0 118 263.0 123 277.0 124 226.0 125 628.0 126 199.0 128 526.0 129 1206.0 130 545.0 132 588.0 136 233.0 139 865.0 140 93.0 142 256.0 144 3027.0 145 387.0 146 387.0 154 216.0 155 170.0 1…	1005	1071	564	538	1052	1166	1835	1378	1563	2363	2494	1671	2275	2072	1989	2478	2669	2438	2509	3906	2485	1026	2522	2283	2647	2609	2442	2451	2821	2641	2680	3042	2575	2448	2831	3775	3055	2751	2583	3185	2932
257	407017	unidentified compound			606719	271	407017	85 421.0 88 392.0 89 1207.0 94 553.0 98 744.0 99 880.0 100 9628.0 102 771.0 104 518.0 105 921.0 109 16604.0 110 1478.0 111 569.0 112 1206.0 113 1958.0 116 859.0 118 868.0 119 736.0 120 464.0 121 201.0 124 124.0 125 160.0 126 959.0 131 2302.0 132 1621.0 133 7592.0 134 1065.0 139 6248.0 140 734.0 141 2167.0 144 639.0 147 29844.0 148 6578.0 149 3496.0 150 248.0 151 255.0 152 110.0 154 223.0 168 409.…	5344	315	719	1031	756	892	865	798	582	998	741	699	457	2739	548	807	635	1350	177	1058	596	686	1058	1003	1281	3078	605	835	1388	1532	1118	1238	907	858	1181	2198	1201	3031	663	1024	823
258	406883	unidentified compound			752555	158	406883	85 1218.0 86 1547.0 88 592.0 89 2894.0 92 336.0 94 479.0 95 172.0 96 549.0 97 389.0 98 594.0 99 1202.0 100 2698.0 101 4069.0 102 1921.0 103 10745.0 104 832.0 105 1239.0 106 117.0 109 444.0 110 323.0 113 1086.0 114 1135.0 115 1577.0 116 2005.0 117 11484.0 118 1498.0 119 1328.0 120 206.0 122 217.0 127 705.0 128 806.0 129 12291.0 130 2230.0 131 3024.0 132 460.0 133 7039.0 134 1231.0 135 653.0 140 27…	4185	973	487	1252	539	1204	2094	604	829	1397	1052	577	1308	2717	1562	618	1018	1195	912	799	1322	704	2494	838	2871	920	1884	945	1481	2299	1121	1032	586	1488	1274	5298	2500	3044	2136	1421	1325
259	406846	unidentified compound			506983	202	406846	85 8013.0 86 8689.0 87 1814.0 88 990.0 89 10371.0 90 2684.0 94 1921.0 95 2039.0 96 3667.0 97 2575.0 98 4681.0 99 5927.0 100 22950.0 101 5057.0 102 9047.0 105 748.0 107 279.0 110 989.0 111 650.0 112 5486.0 113 1502.0 117 8369.0 118 3948.0 119 2081.0 123 606.0 124 571.0 125 1091.0 126 11970.0 127 1703.0 128 3268.0 129 4831.0 130 4216.0 131 2506.0 132 3602.0 133 8815.0 134 1287.0 135 783.0 140 3447.…	4696	2979	1974	2237	1456	1484	5182	2082	1558	1587	4075	2484	1878	8879	3609	2083	1570	2303	2948	3686	888	1008	2146	2299	3007	5615	2832	648	1677	6084	1989	1981	2937	1722	2738	5258	4855	7468	3595	2388	2911
260	401996	unidentified compound			738511	176	401996	87 496.0 88 232.0 89 143.0 91 333.0 92 105.0 94 54.0 97 165.0 98 656.0 99 265.0 100 2597.0 101 560.0 104 469.0 105 328.0 106 91.0 108 80.0 110 149.0 113 118.0 114 610.0 116 1651.0 123 73.0 128 9649.0 129 1437.0 130 1522.0 131 157.0 132 2590.0 133 546.0 134 169.0 137 62.0 138 29.0 141 317.0 143 762.0 169 529.0 170 113.0 172 251.0 176 21012.0 177 2823.0 178 2454.0 179 77.0 180 58.0 183 78.0 184 27.…	1717	3233	1497	688	1018	988	961	1188	1068	1149	1352	766	1362	2076	3094	1324	953	1777	1165	1577	1305	1212	1306	1421	1387	2513	3192	1169	1959	2120	1873	1554	1721	1340	1822	2871	1501	2191	3090	1491	2046
261	399512	unidentified compound			816290	190	399512	85 150.0 86 373.0 87 88.0 88 221.0 89 92.0 92 59.0 94 42.0 95 199.0 96 147.0 98 266.0 99 362.0 100 520.0 101 318.0 102 578.0 103 218.0 104 58.0 105 90.0 109 127.0 112 113.0 113 128.0 114 152.0 115 249.0 116 494.0 117 403.0 118 305.0 119 92.0 125 33.0 126 67.0 127 362.0 128 276.0 130 634.0 131 547.0 132 280.0 133 1499.0 134 229.0 135 65.0 137 156.0 141 192.0 142 336.0 143 77.0 144 258.0 145 114.0 …	692	638	702	738	674	640	902	704	510	604	945	590	528	571	624	589	657	910	748	1023	888	760	861	864	650	1187	989	934	784	962	720	882	682	501	1270	1783	757	1172	1279	1173	905
262	399324	unidentified compound			587522	199	399324	85 5292.0 86 1080.0 87 4423.0 88 867.0 89 1066.0 91 1471.0 93 1075.0 94 500.0 96 5304.0 97 3545.0 98 523.0 99 1741.0 100 5048.0 101 3571.0 102 9217.0 103 4083.0 104 2153.0 105 918.0 106 395.0 114 752.0 115 773.0 116 5562.0 117 1292.0 120 3688.0 121 1369.0 122 244.0 127 399.0 128 2219.0 129 3442.0 130 3720.0 131 3006.0 143 679.0 144 9646.0 145 1404.0 146 1284.0 148 5820.0 149 937.0 150 704.0 151 1…	1866	168	1070	1102	753	1185	1611	1691	1707	425	2312	1895	1504	2215	811	1840	1457	1454	2271	3305	1272	2452	2772	2715	2353	1344	2920	2659	3251	3848	3726	3205	1803	3475	585	6423	3414	1161	1509	1455	4175
263	399323	unidentified compound			437508	167	399323	85 116.0 86 5079.0 87 1225.0 88 1262.0 89 3535.0 90 777.0 92 316.0 93 299.0 94 265.0 96 1455.0 97 2713.0 98 494.0 100 1554.0 101 798.0 102 994.0 103 14187.0 104 2151.0 105 318.0 106 887.0 107 247.0 110 1234.0 112 309.0 113 718.0 114 1361.0 116 1331.0 117 1139.0 118 625.0 119 4646.0 120 608.0 121 185.0 122 93.0 124 282.0 128 75.0 130 1335.0 131 468.0 132 2296.0 133 1192.0 134 1086.0 137 795.0 138 …	198	283	167	341	133	334	310	518	417	540	650	357	347	488	801	898	490	802	798	1691	1071	858	1191	1030	663	852	1283	805	1141	1238	1632	2077	1708	1574	2095	3394	1495	2153	2149	1567	2889
264	397516	unidentified compound			225549	153	397516	95 103.0 98 8868.0 99 907.0 113 72.0 123 1353.0 124 44.0 125 787.0 130 285.0 136 101.0 137 1478.0 140 230.0 147 3993.0 153 41614.0 154 4579.0 155 1525.0 164 337.0 167 4801.0 168 5340.0 184 131.0 208 75.0 223 43.0 230 58.0 237 35.0 244 32.0 258 290.0 299 26.0	7732	6206	2089	5959	7867	9171	10245	11958	9733	11736	14487	13548	12402	14056	12861	14418	12912	15268	14573	21996	16648	12558	17940	19488	16766	14926	19106	20494	11770	23047	20937	21700	21981	21786	24010	31524	25344	24954	24489	23833	26134
265	396760	unidentified compound			760908	387	396760	85 4144.0 88 585.0 91 513.0 95 4504.0 97 1292.0 99 441.0 102 726.0 107 699.0 109 387.0 115 4362.0 117 3363.0 119 2906.0 124 375.0 128 443.0 129 3526.0 130 1613.0 131 5216.0 133 32660.0 134 5755.0 135 3410.0 136 761.0 138 182.0 139 325.0 141 176.0 145 690.0 146 908.0 147 47239.0 148 9785.0 149 49048.0 150 7013.0 151 4721.0 157 683.0 158 750.0 161 434.0 163 694.0 172 576.0 173 523.0 185 520.0 187 1…	183	219	233	175	105	235	199	321	307	190	162	212	173	198	201	246	189	202	264	433	164	251	289	237	190	243	166	280	214	355	402	230	259	302	279	327	258	256	216	219	404
266	396036	unidentified compound			497470	202	396036	85 1417.0 86 1866.0 88 160.0 89 782.0 90 311.0 92 32.0 94 72.0 95 268.0 99 1118.0 100 7911.0 101 1440.0 102 8090.0 103 2850.0 112 1311.0 114 365.0 115 1821.0 116 1728.0 117 2760.0 118 284.0 119 229.0 121 143.0 122 100.0 126 236.0 127 151.0 128 549.0 129 1692.0 130 1263.0 132 928.0 133 4109.0 134 502.0 135 380.0 136 77.0 139 217.0 142 1625.0 144 2330.0 146 452.0 150 302.0 152 33.0 158 27630.0 159 …	2351	427	1087	1320	835	1106	2220	701	678	1508	2302	2031	1200	3985	1796	1639	1511	2603	2347	2576	886	527	1975	2005	3281	2854	1667	998	1545	3663	1639	1844	1944	1517	2088	4504	3240	4783	3023	2310	3561
267	395914	unidentified compound			590000	140	395914	86 221.0 88 181.0 90 283.0 91 233.0 94 86.0 95 289.0 96 2956.0 97 649.0 98 573.0 100 146.0 103 861.0 104 179.0 110 221.0 112 93.0 113 518.0 114 171.0 115 145.0 116 428.0 119 102.0 120 534.0 121 23.0 122 52.0 123 459.0 124 911.0 126 192.0 127 269.0 128 75.0 130 186.0 134 133.0 140 4540.0 141 388.0 142 181.0 144 1370.0 145 313.0 146 1380.0 148 284.0 150 49.0 151 84.0 152 196.0 153 326.0 154 46.0 15…	4147	4474	2441	3025	3548	3683	4115	4773	3653	4608	4161	4794	203	5638	3262	3840	4570	5456	5861	7877	3885	4221	6144	6967	3674	4887	6692	5713	5614	5465	6676	7351	6385	4591	5722	9545	7161	7639	8480	7804	9819
268	395910	unidentified compound			571001	106	395910	86 347.0 87 637.0 88 265.0 90 2159.0 91 479.0 92 272.0 94 324.0 95 252.0 100 683.0 101 303.0 103 1021.0 104 243.0 105 261.0 106 11620.0 107 960.0 108 139.0 109 191.0 115 1352.0 116 1491.0 117 2622.0 119 174.0 121 62.0 124 63.0 128 432.0 130 483.0 131 1955.0 132 261.0 133 971.0 134 136.0 135 145.0 136 526.0 139 836.0 140 662.0 141 201.0 142 358.0 143 189.0 144 305.0 145 339.0 147 7738.0 148 1150.0…	959	1383	445	579	871	890	1097	1546	958	1515	1598	1063	1195	1319	1249	1608	1190	1244	1324	2441	1695	1427	1242	1164	1124	1461	1900	1651	1853	2342	2290	2774	1538	1644	2041	3966	1909	1698	2666	1852	3139
269	395904	unidentified compound			222102	121	395904	85 4310.0 86 3532.0 87 3259.0 89 2643.0 90 590.0 91 3887.0 92 2873.0 93 2543.0 97 1744.0 99 709.0 100 30505.0 101 4344.0 102 7018.0 103 3325.0 104 930.0 105 810.0 111 4408.0 112 1947.0 113 1699.0 116 2300.0 117 2403.0 118 1736.0 119 597.0 120 8128.0 121 18579.0 122 1242.0 123 397.0 129 2737.0 132 6860.0 133 4848.0 135 2251.0 136 1607.0 140 3744.0 141 4093.0 142 278.0 143 1497.0 144 2557.0 146 949…	11179	10197	11661	12123	9965	13655	9320	7998	7836	11065	14064	16981	17711	10706	3464	15492	12545	9522	13550	22135	15515	11943	18550	19611	22706	5285	11666	25489	12973	21957	14484	17244	13026	23547	11436	18990	7142	10788	16747	22362	22432
270	394932	unidentified compound			407359	228	394932	85 4193.0 88 10823.0 90 2894.0 92 2242.0 95 1513.0 97 8089.0 103 27596.0 107 3928.0 110 104298.0 111 3121.0 112 2272.0 113 2558.0 117 21514.0 118 4239.0 120 4804.0 121 2143.0 122 382.0 123 3209.0 124 1284.0 125 785.0 127 3311.0 131 47858.0 133 35921.0 134 35817.0 135 22545.0 136 16935.0 137 4817.0 143 2369.0 145 3022.0 146 1221.0 147 65633.0 148 10571.0 149 22221.0 151 82791.0 152 14379.0 153 663…	1854	1716	198	636	562	853	1177	1102	926	1804	1237	1681	1442	2342	1405	1389	935	1495	1616	1850	1237	2991	2320	2549	783	4156	1693	1663	2079	3100	2224	3328	2379	2272	2349	4019	2092	5067	2722	2489	3029
271	393845	unidentified compound			912182	290	393845	85 236.0 86 381.0 88 262.0 90 130.0 91 223.0 93 420.0 97 901.0 98 372.0 100 367.0 103 4797.0 105 305.0 106 94.0 110 3334.0 112 126.0 114 174.0 117 1920.0 118 168.0 119 104.0 122 32.0 128 575.0 130 168.0 132 299.0 134 1315.0 136 263.0 139 122.0 141 183.0 142 268.0 143 307.0 144 899.0 147 2025.0 149 426.0 152 124.0 156 44.0 158 299.0 159 241.0 160 422.0 165 151.0 168 71.0 171 63.0 173 391.0 174 418…	12362	14480	243	8000	10316	8691	11512	10755	9512	9415	15655	12666	13245	17688	13691	15873	13156	14731	16651	15805	813	16518	18006	20138	16599	19617	18173	14517	15309	21703	14686	19434	24032	20466	17796	16140	20243	23655	21413	18834	20463
272	393844	unidentified compound			187798	186	393844	85 7886.0 89 3702.0 90 180.0 91 1298.0 92 621.0 93 9036.0 94 992.0 95 501.0 96 958.0 97 1299.0 98 2119.0 99 4375.0 100 784.0 101 1106.0 102 584.0 104 1973.0 107 245.0 111 816.0 113 111.0 114 351.0 115 427.0 116 599.0 118 146.0 119 1713.0 120 960.0 122 521.0 123 1014.0 124 421.0 125 634.0 130 997.0 131 775.0 136 4318.0 137 1668.0 138 296.0 139 63.0 141 482.0 142 708.0 143 227.0 144 82.0 147 952.0 …	na	na	na	na	na	na	na	na	na	na	na	na	na	na	na	na	na	na	na	na	na	na	na	na	na	na	na	na	na	na	na	na	na	na	na	na	na	na	na	na	na
273	393843	unidentified compound			569518	117	393843	85 1135.0 86 1486.0 87 769.0 88 240.0 89 359.0 90 185.0 91 297.0 93 234.0 94 127.0 95 447.0 96 790.0 97 666.0 98 470.0 99 923.0 100 2050.0 101 1239.0 102 606.0 103 246.0 104 562.0 105 488.0 109 217.0 110 972.0 111 430.0 112 98.0 113 581.0 114 774.0 115 1890.0 116 415.0 117 32499.0 118 3741.0 119 1444.0 120 784.0 121 80.0 123 96.0 124 131.0 125 177.0 127 1045.0 128 485.0 130 976.0 131 466.0 132 20…	5106	5792	5004	6715	7637	8563	4663	7834	6990	8456	7407	7989	6880	8216	6937	13635	6916	7112	7012	10661	7856	7473	8925	9698	7021	4246	6865	7992	6545	10150	6422	9724	8345	9409	9583	8086	8191	7376	8930	8431	11889
274	393841	unidentified compound			827427	290	393841	85 357.0 86 573.0 89 344.0 93 577.0 94 71.0 100 445.0 101 748.0 102 316.0 103 5900.0 104 646.0 105 368.0 107 122.0 112 93.0 113 242.0 115 185.0 116 314.0 117 1806.0 118 192.0 119 247.0 123 39.0 125 210.0 127 506.0 128 200.0 129 271.0 130 784.0 131 254.0 135 202.0 139 44.0 141 42.0 142 266.0 143 193.0 144 1284.0 145 262.0 146 33.0 147 1055.0 148 173.0 153 62.0 154 25.0 156 177.0 157 162.0 158 941.…	17240	16724	1410	9700	17890	16504	24017	19966	15385	17449	24569	18870	18678	23602	19802	17880	17816	19481	30386	37418	17368	28410	31742	30819	24737	29445	28083	27675	27169	33829	26783	32276	29032	24208	29125	39830	29111	28934	33248	33858	33353
275	391892	unidentified compound			652623	179	391892	85 5153.0 86 6223.0 87 8147.0 88 4686.0 89 55910.0 90 5834.0 91 5550.0 92 772.0 94 519.0 96 1450.0 98 1170.0 99 4998.0 100 9622.0 101 19478.0 102 6946.0 103 70761.0 105 13539.0 106 778.0 109 257.0 111 2550.0 112 1556.0 113 3096.0 114 5788.0 115 6848.0 116 5962.0 117 54984.0 119 7079.0 120 743.0 123 182.0 126 1713.0 127 2758.0 128 2019.0 131 17403.0 132 2428.0 133 43487.0 134 4962.0 135 4182.0 136…	19488	28244	24260	23144	36929	33394	29676	26757	27070	34969	43795	31761	26666	30229	33673	36404	27645	39323	33620	50204	23803	19668	26039	26965	33876	17333	28099	14572	24979	57327	25288	39752	25022	33163	24586	38112	45651	30364	42776	30545	56022
276	391868	unidentified compound			640877	179	391868	87 504.0 89 1209.0 93 119.0 100 605.0 102 422.0 105 1303.0 106 169.0 114 141.0 116 486.0 117 2391.0 118 527.0 119 105.0 122 37.0 129 377.0 130 551.0 131 1324.0 132 111.0 133 1054.0 134 410.0 135 57.0 140 71.0 141 112.0 144 19.0 146 86.0 147 4913.0 148 1318.0 149 313.0 153 52.0 159 278.0 160 1426.0 161 1008.0 162 241.0 163 383.0 164 227.0 165 142.0 166 23.0 174 131.0 175 350.0 176 75.0 177 235.0 1…	4246	5255	3159	5305	6509	6794	5000	4782	5169	4879	6042	6371	7573	3123	3930	6330	5356	4842	8078	9267	4006	4460	6128	5807	12418	2623	3479	3929	6104	8844	5366	7375	5479	7087	3454	6380	6478	2543	5128	7369	6928
277	391855	unidentified compound			323204	174	391855	86 27981.0 87 57608.0 88 3199.0 91 694.0 94 536.0 95 354.0 100 14489.0 101 7467.0 102 3041.0 103 1060.0 108 57.0 109 132.0 117 1453.0 119 1887.0 123 306.0 125 90.0 129 5421.0 130 6143.0 131 2567.0 133 6479.0 134 758.0 136 71.0 141 2944.0 143 3288.0 144 364.0 145 1257.0 158 180.0 174 38517.0 175 6573.0 176 2822.0 177 94.0 178 14.0 221 64.0 223 31.0 239 106.0 245 78.0 247 41.0 248 83.0 250 24.0 256…	42998	53217	37660	37413	43956	47041	41870	48362	38467	48828	55374	47424	60784	59459	52702	70203	58587	52296	59442	60977	47115	51504	61287	61095	45907	54992	56379	46690	42014	65389	48319	66643	62644	64784	62127	62362	60763	94973	93090	77678	72091
278	391853	unidentified compound			245700	154	391853	85 4204.0 87 4814.0 88 12359.0 89 2553.0 90 999.0 91 3512.0 96 1473.0 97 1248.0 105 8851.0 106 1402.0 107 1222.0 108 320.0 109 349.0 110 10951.0 111 801.0 120 322.0 121 1539.0 122 478.0 123 779.0 124 149.0 125 432.0 126 258.0 127 3097.0 131 1481.0 134 2566.0 136 394.0 137 1457.0 138 714.0 139 382.0 140 125.0 141 310.0 148 4198.0 149 2387.0 150 293.0 151 3187.0 152 355.0 153 468.0 154 29873.0 155 …	3613	3216	1791	1832	2467	2870	2503	1873	1906	1712	1861	2194	2909	2981	2385	2623	2450	2422	1949	4551	2270	2069	2231	2306	2556	2652	2218	3236	3021	3155	3012	2729	1977	1982	3599	3311	2300	2319	2689	2260	2193
279	391842	unidentified compound			474172	98	391842	85 408.0 86 419.0 87 130.0 88 128.0 96 108.0 97 293.0 98 16194.0 99 1633.0 101 769.0 102 1577.0 103 2061.0 104 170.0 105 94.0 111 6938.0 112 443.0 113 107.0 114 22.0 117 1527.0 118 80.0 119 65.0 124 31.0 125 85.0 126 102.0 127 79.0 128 180.0 129 1573.0 130 611.0 131 293.0 132 129.0 133 470.0 134 61.0 141 2402.0 142 484.0 143 358.0 144 245.0 147 2792.0 148 440.0 149 650.0 150 54.0 154 40.0 156 204…	31251	36406	24286	29487	32483	23327	36277	31100	17864	23846	37857	32807	30573	46252	48918	43645	36876	32863	36072	58860	44832	31958	46797	45370	47125	43842	66782	35256	47823	70260	74262	55677	51229	51449	53230	71890	64325	61711	83376	96428	89147
280	391740	unidentified compound			319340	212	391740	85 460.0 91 478.0 95 215.0 96 232.0 97 381.0 99 304.0 102 75.0 103 1553.0 105 144.0 106 70.0 107 17.0 111 122.0 114 119.0 115 326.0 116 82.0 117 251.0 120 574.0 121 163.0 124 49.0 125 122.0 126 39.0 129 881.0 130 389.0 131 415.0 132 70.0 133 803.0 135 76.0 139 323.0 140 375.0 143 770.0 144 277.0 145 187.0 147 7964.0 148 1471.0 149 489.0 152 98.0 153 73.0 158 53.0 159 30.0 166 317.0 168 59.0 170 4…	2668	3263	2870	5365	5335	4659	8810	4736	5064	4226	6241	6942	4098	2641	3216	4690	7482	4466	6504	9121	3902	3636	5639	6195	7957	1964	3427	4416	5981	6455	5045	3900	4183	5109	5027	6067	13813	2283	5033	4983	4962
281	390961	unidentified compound			826225	204	390961	89 552.0 90 77.0 93 146.0 101 867.0 102 364.0 103 2211.0 104 345.0 105 91.0 111 50.0 112 66.0 113 184.0 114 107.0 115 62.0 116 726.0 119 194.0 127 89.0 128 240.0 129 1708.0 130 855.0 131 493.0 132 96.0 133 1361.0 134 138.0 142 575.0 143 533.0 146 117.0 147 4656.0 148 875.0 149 477.0 151 115.0 153 87.0 154 83.0 155 127.0 156 222.0 157 325.0 161 158.0 162 41.0 163 117.0 165 49.0 168 98.0 169 119.0 …	123022	36508	257566	76181	81741	68945	141339	89333	70840	92610	116481	61854	77138	123255	213896	63676	76721	119811	114220	111462	94241	73221	122713	86123	122099	164245	162528	81195	153870	158755	134297	137454	130999	114721	142537	255118	98806	197991	203003	131385	130957
282	390552	unidentified compound			636790	174	390552	85 2389.0 86 20792.0 87 4357.0 88 4709.0 90 943.0 91 1176.0 92 361.0 94 1233.0 95 357.0 96 1122.0 97 529.0 98 896.0 99 1001.0 100 9207.0 101 2912.0 102 4257.0 105 82405.0 106 6867.0 107 694.0 108 60.0 111 464.0 112 1529.0 113 887.0 114 3978.0 115 1462.0 116 3292.0 117 5703.0 118 1804.0 119 914.0 121 818.0 124 103.0 126 753.0 127 174.0 130 4499.0 131 2589.0 132 1957.0 134 1389.0 135 1354.0 137 97.…	15386	15045	18694	11707	22901	23327	10108	18597	14462	37065	25725	23114	15444	25495	24743	22084	23032	27798	20125	34546	22328	21992	24508	28668	13773	12044	24060	18484	22901	36051	21880	30660	18928	23690	30216	29514	40296	22102	33690	34686	46979
283	390546	unidentified compound			623908	160	390546	85 1925.0 86 3468.0 87 1206.0 88 961.0 89 10530.0 90 675.0 91 847.0 93 521.0 94 408.0 95 807.0 96 3018.0 97 2151.0 98 1038.0 99 465.0 100 4071.0 101 3656.0 102 1642.0 103 23550.0 104 2504.0 105 4521.0 106 524.0 107 563.0 109 280.0 110 1691.0 111 1227.0 112 1606.0 113 759.0 114 2818.0 115 1502.0 116 2240.0 117 23327.0 118 2479.0 119 2030.0 120 241.0 121 1422.0 122 311.0 123 273.0 124 646.0 125 533…	3428	4348	3573	1771	2937	1950	5477	1281	1664	2600	1229	3182	3248	4557	3849	3776	2924	2153	3324	2040	2571	2673	2329	1706	5039	3743	2341	536	2511	3252	1654	2825	1117	2142	2416	1408	2875	3868	3489	2989	1622
284	390400	unidentified compound			288673	126	390400	85 1573.0 90 1095.0 91 594.0 92 4222.0 93 2234.0 94 919.0 95 118.0 96 1607.0 97 8762.0 98 2623.0 106 9459.0 107 1765.0 108 230.0 109 1203.0 110 1088.0 113 996.0 114 2144.0 123 172.0 126 61338.0 127 38445.0 128 1423.0 131 135.0 138 1598.0 139 43202.0 140 15795.0 141 870.0 158 128.0 167 370.0 182 143.0 183 3586.0 184 113.0 185 286.0 186 208.0 198 142.0 213 279.0 235 106.0 248 71.0 257 123.0 258 84.…	47937	48704	36241	47168	40025	43347	69238	50989	46865	41361	42652	52299	50848	37629	56060	48489	46793	45991	45676	50421	47112	46506	44409	40073	50465	41665	54645	59168	54453	42322	71421	50736	53096	49862	45470	65950	57943	47009	48392	51276	60531
285	390397	unidentified compound			764079	202	390397	85 444.0 88 82.0 93 562.0 98 2672.0 99 397.0 100 151.0 102 683.0 103 415.0 105 150.0 106 86.0 115 522.0 117 416.0 120 61.0 125 33.0 127 108.0 128 271.0 129 831.0 130 1029.0 131 634.0 132 302.0 133 615.0 134 42.0 140 85.0 142 388.0 143 138.0 144 158.0 145 353.0 146 127.0 147 2739.0 148 571.0 149 215.0 153 26.0 154 62.0 156 176.0 158 86.0 160 83.0 162 56.0 164 36.0 168 77.0 170 236.0 171 61.0 172 1…	4913	5403	5124	1851	4508	2173	4146	5118	2804	2369	5498	11642	2974	4803	4581	3699	2850	4661	5445	8310	1800	3073	5421	6170	5889	4344	4738	5218	4370	7855	3994	3943	4908	3527	5693	4046	4842	4111	4968	3377	4976
286	390241	unidentified compound			982493	310	390241	87 169.0 99 88.0 101 178.0 103 1424.0 105 256.0 107 157.0 109 64.0 111 62.0 116 171.0 117 949.0 120 1015.0 124 36.0 128 36.0 129 156.0 130 57.0 131 208.0 132 78.0 140 45.0 143 215.0 145 133.0 147 3096.0 148 945.0 149 275.0 151 138.0 153 81.0 163 215.0 173 47.0 175 23.0 179 54.0 181 75.0 185 28.0 187 45.0 189 96.0 190 365.0 191 252.0 192 2855.0 204 605.0 205 436.0 207 758.0 208 192.0 209 245.0 217…	111	12503	32931	1029	1737	1313	1001	1815	1871	1753	3371	2368	1155	861	11077	1089	1934	2408	2893	1846	3269	2799	90	2025	1052	802	11010	2031	2862	3327	3173	2970	2624	3710	2881	1698	2693	856	13191	2639	5652
287	390230	unidentified compound			495994	263	390230	89 571.0 90 94.0 91 633.0 97 143.0 98 231.0 99 220.0 100 69.0 101 471.0 102 1805.0 103 2662.0 104 366.0 105 490.0 107 232.0 108 128.0 110 533.0 113 56.0 115 731.0 116 269.0 117 2889.0 118 345.0 119 395.0 124 56.0 128 303.0 129 879.0 130 1406.0 131 1049.0 132 191.0 133 1619.0 135 300.0 141 64.0 142 43.0 143 652.0 144 27.0 147 9050.0 148 1319.0 149 1027.0 150 128.0 151 167.0 152 112.0 153 44.0 157 …	16571	8080	10139	8131	8891	9484	9392	9944	8324	9669	9715	8810	9989	13483	8948	7980	8528	8884	9827	9728	7973	8923	10420	10604	9071	12450	9324	6712	9318	11054	9416	11390	7940	9673	10258	10372	9805	13048	10780	9970	11645
288	390218	unidentified compound			673852	361	390218	86 734.0 87 808.0 88 212.0 89 6146.0 90 503.0 91 255.0 93 95.0 94 179.0 101 2312.0 102 412.0 103 13219.0 104 110.0 105 1113.0 109 136.0 110 392.0 111 586.0 112 345.0 113 146.0 114 486.0 115 1108.0 116 1267.0 117 7622.0 118 146.0 119 353.0 120 157.0 121 90.0 125 188.0 127 297.0 129 6528.0 130 1974.0 131 3516.0 133 3904.0 135 624.0 138 153.0 143 1356.0 144 589.0 146 332.0 147 17228.0 148 4092.0 149…	15974	23880	16317	10501	14823	17515	72181	14279	13074	17098	23051	19134	18780	18909	19940	18671	13330	18403	21527	22045	14625	19547	23529	16700	34059	15987	20731	17896	14323	23679	12841	19328	18119	15502	17411	36087	17716	13625	22836	22479	14876
289	390198	unidentified compound			459090	155	390198	85 327.0 86 922.0 87 525.0 89 229.0 90 81.0 93 232.0 94 105.0 95 206.0 97 269.0 98 716.0 99 549.0 100 2474.0 101 419.0 102 299.0 103 1732.0 105 355.0 106 197.0 108 147.0 110 339.0 111 559.0 112 936.0 113 515.0 114 454.0 115 522.0 116 279.0 117 539.0 118 206.0 119 304.0 123 77.0 128 232.0 129 176.0 130 657.0 131 1174.0 132 380.0 133 1495.0 134 145.0 136 109.0 137 82.0 138 78.0 139 4704.0 140 579.0…	26957	13363	8495	7405	7578	8445	6629	8093	8463	9441	9085	11130	10852	8712	4845	4956	7699	7850	8161	12820	7424	21997	9743	13803	9278	16219	5390	15854	26937	13014	14135	10397	11705	9512	11348	14492	13399	7414	5878	14105	9825
211	390194	unidentified compound			514902	142	390194	86 74.0 96 158.0 98 130.0 99 376.0 100 289.0 106 106.0 114 46.0 115 115.0 117 432.0 124 41.0 131 182.0 133 230.0 137 42.0 142 9942.0 143 1423.0 144 418.0 145 74.0 147 2771.0 148 467.0 149 83.0 170 211.0 171 91.0 186 6454.0 187 985.0 188 239.0 198 26.0 214 39.0 216 1837.0 218 61.0 235 19.0 244 72.0 245 28.0 257 36.0 288 624.0 289 129.0 290 49.0 297 22.0 303 12.0 337 16.0 391 21.0 440 17.0 442 22.0…	104098	9974	39018	34801	43238	25426	60278	30384	17481	31356	55059	35528	34857	113847	65532	60833	34869	30540	38168	56815	40659	14994	50490	42062	93360	109683	57551	16151	45343	104500	50893	42989	33178	56358	52813	92688	55866	126923	72291	102237	94609
290	390191	unidentified compound			639827	157	390191	86 313.0 87 317.0 88 73.0 89 2777.0 91 162.0 93 191.0 96 305.0 97 146.0 98 85.0 99 181.0 100 757.0 101 1333.0 102 116.0 103 7730.0 104 592.0 105 256.0 112 156.0 113 282.0 115 791.0 116 154.0 117 2484.0 119 335.0 120 42.0 124 69.0 125 63.0 128 187.0 129 5149.0 130 899.0 131 341.0 132 74.0 133 3556.0 134 373.0 135 104.0 138 156.0 139 73.0 141 57.0 142 473.0 143 1067.0 144 64.0 145 377.0 146 141.0 1…	13057	34446	29679	24309	26167	24498	24761	28388	25280	28384	17684	33879	31369	20512	19885	33766	28272	24334	33684	16997	21803	19281	30073	34184	15930	15052	22520	15710	25863	32191	23674	13912	17231	29693	26578	28899	26405	12950	31090	15999	31040
291	390185	unidentified compound			361861	212	390185	85 480.0 86 757.0 87 491.0 88 1976.0 89 545.0 90 558.0 91 494.0 92 127.0 93 262.0 96 673.0 97 174.0 98 176.0 99 760.0 100 2853.0 101 1926.0 102 330.0 103 16670.0 104 2344.0 105 1143.0 106 390.0 107 181.0 108 112.0 109 39.0 113 155.0 114 331.0 115 710.0 116 2524.0 117 892.0 118 491.0 119 631.0 120 1150.0 121 275.0 122 87.0 129 382.0 131 686.0 133 2259.0 134 1772.0 135 309.0 136 144.0 137 431.0 138…	1559	2168	2032	1637	2761	1732	2601	1937	1500	2391	2815	1369	4519	2024	2406	2164	2750	1803	3202	2555	1619	1708	1779	3188	2932	1245	2514	4522	3263	2968	1755	2918	2689	2718	2222	3039	2358	1675	3004	3650	2571
292	390179	unidentified compound			802240	246	390179	89 129.0 101 160.0 114 145.0 117 173.0 128 182.0 129 183.0 182 48.0 205 95.0 207 211.0 226 29.0 230 46.0 239 31.0 246 4231.0 247 1056.0 248 393.0 256 32.0 258 22.0 303 43.0 342 231.0 343 78.0 376 29.0	784	4267	10053	1242	898	722	1557	875	699	869	952	914	1128	1136	3555	1190	740	1271	1346	1583	1920	1717	1366	1330	1815	1114	4418	1453	1849	3074	1568	1589	964	1686	1614	3679	1252	518	5529	1809	2302
293	390155	unidentified compound			439615	172	390155	85 54.0 86 298.0 87 202.0 88 106.0 95 110.0 98 297.0 99 251.0 100 207.0 101 608.0 103 226.0 108 163.0 110 97.0 112 82.0 113 163.0 114 407.0 115 203.0 116 250.0 121 81.0 124 63.0 126 330.0 130 1262.0 131 105.0 133 226.0 134 77.0 138 251.0 140 55.0 142 167.0 144 170.0 152 53.0 154 70.0 158 159.0 159 37.0 170 181.0 171 128.0 172 18596.0 173 2697.0 174 729.0 175 79.0 182 64.0 188 22.0 200 64.0 210 63…	2252	1797	3871	1094	266	368	782	5099	1809	312	5119	602	3300	2302	1613	14782	650	551	409	766	308	33488	2636	729	1737	2072	1683	1297	712	427	486	370	282	509	1664	852	514	2264	1807	674	768
294	390149	unidentified compound			318714	212	390149	85 436.0 93 137.0 95 291.0 97 252.0 99 377.0 102 238.0 112 180.0 120 802.0 122 65.0 129 535.0 130 113.0 133 120.0 139 160.0 140 183.0 142 273.0 143 29.0 148 279.0 150 217.0 153 143.0 157 75.0 158 416.0 166 335.0 170 579.0 171 389.0 186 354.0 206 65.0 212 3895.0 213 182.0 214 128.0 227 58.0 228 37.0 232 42.0 233 65.0 255 46.0 266 22.0 284 973.0 285 119.0 465 30.0	3445	4130	4072	4139	5335	4659	8810	4736	3779	4226	6241	6942	5759	3511	4054	3607	7482	5831	8373	9121	5020	5036	7970	8348	7957	2607	3427	5851	4942	8685	6807	3900	5747	7276	5027	6067	13813	2963	5033	6447	6236
295	390144	unidentified compound			570168	304	390144	85 1057.0 86 360.0 87 1124.0 88 265.0 89 7311.0 90 3551.0 91 1074.0 92 402.0 93 123.0 94 831.0 95 147.0 98 2284.0 99 1398.0 100 1553.0 101 355.0 102 253.0 103 252.0 105 6022.0 106 579.0 108 152.0 110 99.0 112 370.0 113 515.0 114 737.0 115 5507.0 116 2493.0 117 1962.0 118 375.0 119 704.0 120 77.0 124 186.0 126 170.0 127 317.0 128 892.0 130 1004.0 131 4637.0 132 703.0 133 4616.0 134 495.0 135 417.0…	657	2311	146	575	832	1040	1578	458	1437	1094	659	460	976	483	1507	1754	1035	277	423	4592	1650	923	1382	1049	8204	608	1355	1044	769	3161	1130	867	664	1400	1074	4239	1178	575	1730	353	446
296	390143	unidentified compound			470113	184	390143	87 430.0 88 428.0 89 1009.0 90 110.0 91 306.0 96 844.0 99 565.0 100 285.0 101 1687.0 102 206.0 103 6205.0 104 563.0 105 354.0 106 176.0 110 1174.0 111 217.0 112 230.0 113 659.0 114 225.0 115 574.0 116 1096.0 117 4384.0 118 939.0 119 314.0 120 30.0 121 81.0 124 68.0 125 89.0 126 130.0 127 481.0 128 373.0 129 2876.0 130 212.0 131 1031.0 132 75.0 133 2536.0 134 3348.0 135 491.0 136 188.0 138 62.0 14…	278	1295	394	1063	1300	531	1004	1223	1301	1080	1569	1038	1625	1863	1638	1031	1526	1570	1975	1735	1523	1666	450	1006	1487	2292	461	1565	385	1876	1322	2524	1707	1676	2163	2407	1849	2387	1681	2198	2067
297	390140	unidentified compound			652561	273	390140	85 2030.0 86 3702.0 87 3093.0 88 1974.0 89 24416.0 90 2306.0 91 1859.0 92 287.0 94 52.0 95 648.0 96 807.0 97 863.0 98 1345.0 99 1718.0 100 5802.0 101 12721.0 102 2278.0 103 24750.0 104 2608.0 105 7229.0 106 1111.0 107 93.0 110 293.0 111 1278.0 112 1618.0 113 1988.0 114 5274.0 115 3854.0 116 4894.0 117 42514.0 118 3762.0 119 4906.0 120 292.0 121 222.0 122 48.0 124 479.0 125 177.0 126 1784.0 127 32…	37627	56457	125759	36845	44537	40505	27418	48545	37255	47192	50553	44177	42098	41271	46864	55756	38038	50605	45121	44180	33949	37523	41418	40489	30194	34121	45922	39125	36646	44825	39567	53833	47018	42685	42667	45553	44529	32029	48067	46327	54281
298	390135	unidentified compound			628121	214	390135	87 188.0 89 2734.0 91 6304.0 92 815.0 93 6789.0 94 3810.0 97 93.0 99 143.0 100 645.0 101 395.0 103 8639.0 104 713.0 105 871.0 106 57.0 107 1544.0 112 221.0 113 217.0 114 109.0 115 411.0 116 208.0 117 3285.0 118 420.0 119 810.0 120 9008.0 121 7743.0 122 645.0 126 72.0 128 142.0 129 2689.0 130 1094.0 131 730.0 132 117.0 133 1634.0 134 206.0 135 281.0 137 88.0 142 30.0 143 279.0 144 66.0 145 91.0 14…	2002	25818	31808	5891	3884	7515	8629	5975	5610	7017	8177	4722	5142	3369	31380	7038	4655	5626	4286	5765	4691	4319	5303	5718	6541	3027	28378	7124	5908	6847	4975	7497	6996	5542	5737	9627	8591	3938	30535	7040	6222
299	390126	unidentified compound			672035	187	390126	89 3774.0 90 542.0 91 227.0 94 180.0 96 184.0 98 463.0 99 278.0 100 991.0 103 3927.0 104 388.0 106 172.0 114 735.0 117 3680.0 118 511.0 119 455.0 124 61.0 128 173.0 129 1981.0 130 362.0 131 1788.0 133 3172.0 134 313.0 135 275.0 137 42.0 138 180.0 141 243.0 142 208.0 145 687.0 147 9559.0 148 1576.0 149 1123.0 155 102.0 156 143.0 158 309.0 159 336.0 161 763.0 163 826.0 164 136.0 168 158.0 170 174.0…	5547	6414	14406	4614	6652	5591	5398	5856	4839	6084	7920	6147	5425	6730	6071	7358	5221	6603	7176	9276	5285	6675	7854	6181	7076	6864	5263	5963	6140	8970	6021	8203	6618	6324	6292	7535	6537	3709	7466	6787	7807
300	390122	unidentified compound			699375	204	390122	85 164.0 86 422.0 87 338.0 88 44.0 89 4052.0 90 109.0 97 105.0 99 148.0 100 2592.0 101 1284.0 102 884.0 103 2651.0 104 572.0 105 517.0 108 66.0 110 135.0 111 203.0 112 113.0 113 312.0 114 62.0 115 404.0 116 677.0 117 1221.0 118 276.0 119 65.0 124 54.0 125 63.0 127 206.0 128 181.0 129 2141.0 130 94.0 131 1252.0 132 399.0 133 1148.0 134 355.0 135 201.0 136 30.0 137 83.0 142 271.0 143 691.0 147 6049…	41277	47739	51055	18529	27109	25687	143432	27905	23074	33878	47023	34844	29817	41721	44747	41446	26207	37056	38948	63462	27818	33747	45514	33248	60555	41859	47575	34144	33443	50841	30292	44615	40564	34697	39776	77667	38587	40172	55581	48240	36993
301	389991	unidentified compound			326960	140	389991	85 3373.0 87 8176.0 88 1565.0 90 2584.0 91 566.0 94 199.0 95 255.0 97 871.0 105 951.0 109 208.0 110 1533.0 111 1641.0 112 1441.0 113 3045.0 114 3030.0 115 4155.0 117 2356.0 118 1247.0 123 161.0 124 271.0 126 717.0 127 10995.0 128 1365.0 130 10372.0 131 9538.0 132 8322.0 137 134.0 140 12056.0 141 1446.0 142 4545.0 143 3294.0 144 672.0 146 11105.0 147 114818.0 148 25496.0 149 13797.0 150 1710.0 152…	19654	19821	20465	14682	16988	17854	16382	18591	15171	15695	17662	15925	18104	19222	17794	19984	16797	17847	18435	18359	15886	19079	18064	19770	16924	14787	19097	16006	17948	19142	18466	19294	18715	18011	18263	16866	18152	18888	19749	17477	20183
302	389988	unidentified compound			827217	204	389988	86 199.0 88 120.0 89 217.0 100 56.0 103 715.0 104 185.0 105 148.0 107 103.0 114 89.0 115 202.0 116 212.0 117 693.0 118 93.0 119 119.0 120 56.0 122 43.0 128 182.0 129 241.0 130 147.0 131 262.0 133 831.0 134 120.0 144 70.0 147 3003.0 148 246.0 149 405.0 152 46.0 155 79.0 159 232.0 163 139.0 169 35.0 174 109.0 180 48.0 181 22.0 188 58.0 189 56.0 191 394.0 193 169.0 199 49.0 202 54.0 203 82.0 204 721…	96433	36508	212115	62754	65468	52855	115040	72137	57291	76655	92918	48749	62309	101399	173434	51284	60124	91073	91403	91724	75508	58826	98012	68155	97962	132233	134276	64421	120857	130690	109790	114417	104594	86230	115409	210494	79932	159019	158211	90626	108180
303	389434	unidentified compound			496611	166	389434	85 593.0 86 250.0 88 101.0 89 563.0 91 1080.0 92 209.0 94 309.0 96 1012.0 97 410.0 98 519.0 100 422.0 101 525.0 102 615.0 103 1537.0 104 513.0 105 336.0 106 207.0 107 171.0 108 121.0 109 133.0 111 37.0 113 729.0 114 101.0 115 614.0 116 599.0 120 420.0 121 277.0 122 86.0 124 45.0 126 894.0 127 240.0 128 93.0 129 590.0 130 1295.0 131 719.0 132 203.0 133 495.0 135 215.0 136 85.0 137 135.0 138 1078.0…	2901	5434	10560	6970	9832	8114	5059	7868	4052	8940	9970	10321	6709	6238	7494	7670	5683	7101	10112	5544	5135	4130	6093	7032	5405	2581	7690	5885	4550	6438	4441	5300	5492	5821	7123	7247	8703	3652	5507	8050	9007
304	388195	unidentified compound			803781	146	388195	85 1479.0 86 756.0 87 511.0 88 450.0 89 358.0 90 106.0 91 1105.0 93 940.0 94 186.0 95 2220.0 96 847.0 97 2297.0 98 1528.0 99 906.0 100 3963.0 101 480.0 104 374.0 105 629.0 106 128.0 107 831.0 108 622.0 109 1251.0 110 1249.0 111 949.0 112 497.0 113 387.0 114 700.0 115 2361.0 116 1123.0 119 479.0 120 123.0 121 944.0 122 51.0 123 552.0 124 116.0 125 483.0 126 142.0 127 141.0 128 121.0 129 928.0 130 …	39043	28001	27150	23988	37332	32403	42236	32673	26243	21285	43339	33676	31621	36978	8509	43870	30822	41693	45153	46002	28723	37897	40844	42053	44806	35213	21567	42453	33489	46099	31201	40579	32821	33017	32861	39955	31730	29477	14198	34633	38175
305	388165	unidentified compound			290282	95	388165	85 5239.0 86 1206.0 88 1731.0 89 22485.0 90 1914.0 91 1847.0 92 956.0 93 718.0 94 813.0 95 14650.0 97 2466.0 98 625.0 99 554.0 102 229.0 105 954.0 106 2958.0 107 1368.0 110 3050.0 111 236.0 112 299.0 113 4438.0 114 2425.0 115 830.0 116 1278.0 120 196.0 123 125.0 124 96.0 126 5841.0 127 4248.0 128 1288.0 129 485.0 130 241.0 131 820.0 132 2724.0 134 286.0 135 508.0 138 343.0 139 3000.0 140 3455.0 1…	5425	5775	5606	8857	10875	9727	12521	11734	11201	9489	9664	9479	8729	9968	8010	15123	9175	12025	11247	11413	9277	7272	11686	10862	11296	6186	8472	8070	6219	11788	8444	10539	11405	12103	10919	13295	11803	8813	9428	11041	11911
306	386719	unidentified compound			782145	399	386719	86 280.0 87 315.0 91 412.0 93 96.0 95 766.0 101 472.0 104 63.0 109 223.0 110 53.0 112 104.0 118 270.0 121 140.0 122 128.0 123 66.0 125 162.0 128 40.0 131 445.0 132 181.0 134 439.0 135 295.0 136 154.0 137 295.0 138 547.0 139 50.0 140 43.0 147 2845.0 148 255.0 149 216.0 153 60.0 162 198.0 164 40.0 166 64.0 167 84.0 168 167.0 171 52.0 172 79.0 178 133.0 179 93.0 192 486.0 193 84.0 194 116.0 196 443.…	887	1060	646	874	836	741	1264	769	1076	969	1539	1018	368	1058	941	970	1297	1468	1615	1832	1291	1286	1384	1631	864	1031	310	980	2031	1377	142	1992	1159	1023	1903	2132	1944	1141	806	1582	1761
307	385941	unidentified compound			683529	187	385941	85 270.0 86 655.0 87 300.0 88 234.0 89 3254.0 90 324.0 91 402.0 94 224.0 95 257.0 96 497.0 98 250.0 99 698.0 100 1609.0 101 2026.0 102 472.0 103 4137.0 104 476.0 105 456.0 110 288.0 111 634.0 112 416.0 113 386.0 114 1032.0 115 531.0 116 682.0 117 3891.0 118 376.0 119 455.0 120 152.0 123 152.0 124 254.0 125 148.0 126 484.0 128 354.0 129 1465.0 130 1129.0 131 2950.0 132 495.0 133 4533.0 134 665.0 1…	13502	13370	29568	10025	13933	11202	8425	13067	11473	13141	16725	14316	13373	14590	12823	16522	12726	16824	16770	17041	12229	13324	13363	12916	11134	12847	12233	13224	13078	17056	14316	17403	17518	14542	16129	18987	14501	12794	16040	14963	20272
308	384924	unidentified compound			217357	151	384924	86 1502.0 87 5173.0 88 5544.0 91 3423.0 92 536.0 93 447.0 94 663.0 95 3840.0 99 502.0 101 4355.0 102 3427.0 103 5692.0 105 1829.0 107 425.0 109 1031.0 117 70489.0 118 9959.0 119 4486.0 121 522.0 122 475.0 123 777.0 125 114.0 133 14277.0 137 262.0 138 565.0 142 80.0 147 74929.0 148 12987.0 149 6850.0 150 645.0 151 8662.0 152 1156.0 153 286.0 155 169.0 158 77.0 160 118.0 161 270.0 162 54.0 163 104.…	5186	14115	13816	8190	12053	5078	4796	4565	4899	4949	5049	3190	3365	6164	5552	9696	5528	2511	6365	na	na	na	na	7490	5388	7340	na	na	na	na	na	na	na	9124	35578	9295	7251	10468	30211	5163	11438
309	382582	unidentified compound			662245	156	382582	85 14916.0 87 8544.0 88 91669.0 90 971.0 94 7192.0 95 1594.0 96 468.0 97 3136.0 98 19606.0 99 9829.0 100 135416.0 101 16691.0 102 48972.0 103 19646.0 104 2156.0 106 522.0 108 334.0 110 3803.0 111 2267.0 112 52619.0 113 12580.0 114 52774.0 115 76129.0 116 19859.0 119 5121.0 120 1332.0 122 825.0 124 5737.0 125 256.0 126 16960.0 127 4677.0 128 204757.0 129 29605.0 130 50386.0 131 29890.0 132 16627.0…	238672	204150	261449	89515	218163	186388	331290	153883	114224	275809	190062	172149	134315	194580	212966	174339	155181	215978	243285	252863	153120	215936	215119	285382	236872	229523	249099	171107	308563	368906	231431	253765	173057	171092	224376	471011	410821	168125	288925	427936	286785
310	382381	unidentified compound			842304	290	382381	85 19522.0 86 67019.0 87 24144.0 88 56249.0 89 44443.0 90 7317.0 91 5335.0 92 4512.0 93 74699.0 94 8519.0 95 49913.0 96 27847.0 97 134459.0 98 153944.0 99 19048.0 100 50165.0 101 87741.0 102 30439.0 103 973673.0 104 99097.0 105 51163.0 106 4037.0 107 5821.0 108 4526.0 109 5484.0 110 4427.0 111 64991.0 112 18768.0 113 6181.0 114 43983.0 115 22743.0 116 214800.0 117 177712.0 118 28873.0 119 18127.0…	6158479	6265006	18297	4499751	5601403	5458032	6584183	6064123	5621926	5937097	6326094	5892310	5859467	6186996	5908262	5257347	5400810	5789569	6023138	6481555	4716761	5605303	6338283	6236017	6186874	6014890	5896065	5326816	5650516	6489757	5257146	6039422	6002350	5367721	5388305	6686263	5527364	5646435	6018822	6027093	5785414
311	381751	unidentified compound			196531	126	381751	91 579.0 92 1059.0 95 7351.0 96 11800.0 97 8703.0 98 6288.0 100 2348.0 104 3986.0 105 1505.0 106 4961.0 107 416.0 109 865.0 110 2675.0 111 6781.0 112 649.0 113 544.0 117 4555.0 121 1310.0 124 1043.0 126 150317.0 127 5452.0 138 7291.0 139 507.0 140 3914.0 142 948.0 144 997.0 154 729.0 172 3718.0 173 336.0 174 2804.0 176 1912.0 177 346.0 179 200.0 191 564.0 198 268.0 208 5054.0 210 5134.0 212 575.0…	na	na	na	na	na	na	na	na	na	na	na	na	na	na	na	na	na	na	na	na	na	na	na	na	na	na	na	na	na	na	na	na	na	na	na	na	na	na	na	na	na
312	380514	unidentified compound			213012	174	380514	138 104.0 152 131.0 155 126.0 158 105.0 174 1330.0 198 47.0 235 36.0 467 14.0	na	na	na	na	na	na	na	na	na	na	na	na	na	na	na	na	na	na	na	na	na	na	na	na	na	na	na	na	na	na	na	na	na	na	na	na	na	na	na	na	na
313	380388	unidentified compound			339577	259	380388	120 565.0 123 98.0 124 79.0 141 408.0 151 652.0 155 237.0 166 222.0 183 36.0 248 34.0 252 36.0 259 1195.0 260 199.0 261 70.0 272 54.0 277 47.0 279 34.0 301 45.0 306 39.0 308 39.0 313 39.0 337 28.0 360 89.0 362 26.0 413 29.0 422 36.0 439 20.0	1269	3100	1815	1235	1840	1696	1819	2020	768	2038	2447	1425	1764	2268	1533	2064	1585	2092	2166	2441	1609	1669	2098	2349	2165	2479	2128	1522	1830	3253	1958	3073	2727	1799	1980	1769	2318	1986	2927	1997	2379
314	379691	unidentified compound			302511	282	379691	91 183.0 97 559.0 99 184.0 114 83.0 117 218.0 147 5091.0 148 295.0 186 72.0 192 178.0 193 250.0 194 144.0 203 136.0 205 284.0 207 126.0 208 134.0 249 731.0 250 218.0 251 42.0 256 78.0 265 648.0 266 156.0 267 199.0 271 48.0 276 14.0 281 1843.0 282 1470.0 284 135.0 322 24.0 345 28.0 351 46.0 362 27.0 364 24.0 369 429.0 370 259.0 371 77.0 393 27.0 427 34.0 439 41.0 441 62.0 464 39.0 471 28.0 485 24.…	2727	1677	877	1007	948	1648	824	633	963	1551	2162	1172	1325	1341	2064	1831	1470	906	2142	3441	1715	987	2348	2429	1376	812	1595	1985	1750	5157	1623	1612	1588	1722	1863	2391	2382	1906	2337	2940	2337
315	379063	unidentified compound			562916	243	379063	85 1143.0 86 979.0 90 181.0 92 132.0 95 882.0 98 362.0 101 1370.0 102 958.0 103 1218.0 106 164.0 107 484.0 110 1002.0 112 963.0 117 1476.0 118 1023.0 119 694.0 124 119.0 126 704.0 127 662.0 128 630.0 129 1713.0 130 502.0 131 1892.0 132 936.0 133 4587.0 134 697.0 135 479.0 142 482.0 143 784.0 144 748.0 147 2103.0 148 929.0 149 1755.0 153 516.0 155 709.0 159 169.0 161 888.0 163 1283.0 164 165.0 166…	682	4173	4729	5049	5465	4765	5619	5829	6184	5353	6560	7393	6598	2468	3608	1688	4722	4485	5674	4147	4671	6661	5623	6279	5559	3649	4750	8671	9931	4259	8030	5067	6242	5602	7429	9312	8987	2517	2785	8885	6616
316	378468	unidentified compound			312806	144	378468	85 1109.0 86 2240.0 87 742.0 88 232.0 90 193.0 96 354.0 97 432.0 98 556.0 99 364.0 100 7204.0 101 1488.0 102 781.0 103 1602.0 104 131.0 105 246.0 107 301.0 108 192.0 110 1316.0 112 71.0 113 468.0 114 1075.0 115 385.0 116 255.0 117 1100.0 119 598.0 120 351.0 121 367.0 125 147.0 127 1288.0 128 997.0 130 1279.0 131 1474.0 132 861.0 133 3654.0 134 323.0 136 131.0 140 432.0 142 285.0 143 235.0 144 338…	893665	901193	297915	340711	352905	315866	655353	318658	317437	308967	446734	378517	285273	392183	357374	353165	451752	589687	537445	575786	242954	724901	476325	472442	423449	738447	331170	292684	916396	751144	397600	372727	296514	321282	424870	651596	620329	392660	485979	489295	594972
317	378132	unidentified compound			212499	177	378132	95 224.0 99 369.0 115 11969.0 123 663.0 126 112.0 130 8384.0 136 201.0 138 207.0 152 95.0 163 64.0 177 4398.0 178 601.0 179 35.0 180 49.0 198 48.0 206 252.0 212 36.0 215 54.0 217 223.0 231 43.0 240 32.0 289 27.0 297 38.0 308 24.0 317 36.0 341 68.0 393 38.0 431 31.0 441 24.0 447 28.0 453 23.0 466 20.0 468 41.0 470 21.0 482 23.0	na	na	na	na	na	na	na	na	na	na	na	na	na	na	na	na	na	na	na	na	na	na	na	na	na	na	na	na	na	na	na	na	na	na	na	na	na	na	na	na	na
318	378126	unidentified compound			518635	227	378126	85 397.0 92 229.0 98 1192.0 100 6587.0 111 316.0 112 3800.0 114 1299.0 116 233.0 118 233.0 126 2247.0 127 1365.0 128 3202.0 129 289.0 130 1748.0 131 1219.0 132 481.0 133 2639.0 139 3289.0 140 1098.0 142 185.0 146 452.0 147 4345.0 151 34.0 153 2110.0 154 7599.0 155 739.0 156 1031.0 157 1914.0 158 602.0 160 171.0 161 63.0 170 319.0 172 1242.0 176 53.0 179 92.0 182 374.0 183 286.0 185 62.0 197 352.0…	5802	4161	4633	2302	3362	3539	1830	3503	3265	3362	5350	3367	3193	3254	2169	1524	2085	3797	4754	3936	1435	5143	3524	4114	2924	3106	1753	3180	5698	3735	3142	2174	2531	2020	3041	3627	2891	2256	2305	2714	2508
319	377671	unidentified compound			265273	267	377671	86 1031.0 89 2875.0 90 490.0 94 184.0 99 186.0 100 8011.0 103 524.0 104 75.0 105 714.0 106 268.0 120 115.0 131 1083.0 133 862.0 134 864.0 147 5883.0 150 203.0 160 859.0 161 483.0 162 360.0 164 172.0 170 64.0 174 561.0 186 66.0 193 266.0 206 169.0 220 174.0 223 114.0 224 55.0 235 202.0 236 343.0 237 351.0 249 63.0 267 1634.0 313 48.0 331 37.0 355 668.0 356 233.0 357 85.0 385 29.0 470 24.0	9078	9381	5523	3820	2533	6157	3586	2337	2928	4305	3958	4189	5081	6844	3209	5741	6668	2550	5302	12343	6204	5031	5559	8907	5125	4015	2986	7541	5674	10465	5557	5959	4640	4057	3639	5420	4470	4185	3840	3738	4578
320	376984	unidentified compound			299900	210	376984	98 68.0 100 449.0 101 248.0 105 323.0 108 181.0 110 70.0 114 745.0 126 242.0 128 187.0 131 137.0 136 617.0 137 78.0 141 82.0 147 5456.0 150 213.0 151 189.0 153 151.0 159 232.0 167 84.0 172 982.0 174 101.0 177 51.0 178 51.0 182 66.0 188 186.0 198 60.0 210 2078.0 212 127.0 223 41.0 224 534.0 226 138.0 231 134.0 252 71.0 254 25.0 257 43.0 276 32.0 284 33.0 285 229.0 328 43.0 358 14.0 362 35.0 368 24…	1615	1895	1140	1582	1760	1585	2131	2332	1496	2265	1646	1780	1562	1482	2196	2009	1582	1722	1618	2555	1609	1398	2071	2343	1647	1933	2398	2575	1905	2494	2361	2011	1685	1763	2881	2613	2542	1891	2784	1874	2769
321	376648	unidentified compound			290831	126	376648	85 8486.0 86 2686.0 89 38480.0 90 3787.0 91 1212.0 92 2376.0 93 2790.0 94 1578.0 96 1790.0 97 10428.0 98 4139.0 99 3068.0 100 1927.0 103 1054.0 106 11452.0 107 1669.0 109 2125.0 110 6082.0 112 1154.0 113 8157.0 114 8627.0 115 2325.0 117 1107.0 118 162.0 126 97720.0 127 56863.0 128 3518.0 129 382.0 130 76.0 137 1210.0 138 1885.0 139 53457.0 140 27545.0 148 498.0 154 260.0 155 278.0 156 1658.0 158 …	47937	58210	36241	54836	9815	50045	80922	57101	59286	55465	48928	60972	58379	42013	68611	57974	52430	52125	51875	57329	56187	54627	50315	46965	62125	41665	62015	66566	63187	49429	80952	58388	63680	61160	53950	74075	63905	47009	56528	63916	60531
322	370223	unidentified compound			773174	227	370223	85 2111.0 86 1654.0 87 1789.0 88 1245.0 89 2565.0 90 476.0 91 1360.0 92 383.0 93 1514.0 94 800.0 95 1372.0 96 438.0 97 912.0 98 1854.0 99 2007.0 100 4892.0 101 3095.0 102 1048.0 103 5417.0 104 559.0 105 1396.0 106 803.0 107 1281.0 108 663.0 109 8044.0 110 929.0 111 2940.0 112 889.0 113 3439.0 114 1312.0 115 2603.0 116 2148.0 117 2323.0 118 354.0 119 2058.0 120 315.0 121 1052.0 122 272.0 123 773.0…	2671	2274	1333	2980	1973	2252	3202	1753	1782	3180	2260	2493	2139	2790	2242	1968	1908	2521	2714	3910	1962	2295	2081	3162	2721	2626	2977	4963	1844	7645	1989	4098	2843	1542	2837	3960	2906	2513	2575	2248	3285
323	370160	unidentified compound			924574	204	370160	85 2309.0 86 350.0 87 2499.0 88 1108.0 89 6987.0 90 636.0 91 572.0 94 231.0 97 827.0 98 212.0 99 1505.0 101 16087.0 102 2156.0 103 60909.0 104 4810.0 105 2147.0 106 154.0 109 888.0 110 31.0 111 1071.0 112 162.0 113 2205.0 114 515.0 115 1697.0 116 9236.0 117 35261.0 118 3653.0 119 2730.0 120 130.0 121 148.0 122 84.0 123 75.0 127 447.0 128 25.0 129 52898.0 130 6838.0 131 7933.0 132 1130.0 133 11934…	13135	3353	15585	7497	7983	5521	14675	7633	7215	10527	10972	2527	7159	15003	14763	5133	5442	11068	10387	10721	8653	6930	11883	9022	11855	16681	13369	6431	10102	13435	8961	9593	10578	9914	11940	22107	10236	19928	12751	10684	9130
324	369586	unidentified compound			575920	180	369586	85 3454.0 86 2541.0 87 3891.0 88 2767.0 89 7755.0 96 811.0 98 1994.0 100 8036.0 101 4937.0 102 4215.0 103 73529.0 104 7709.0 106 113.0 110 1113.0 111 970.0 112 1324.0 115 3289.0 116 976.0 117 33173.0 118 10588.0 119 26.0 120 915.0 121 222.0 123 374.0 126 4734.0 129 33233.0 130 8099.0 131 10795.0 132 3772.0 133 23270.0 134 877.0 135 1970.0 137 1361.0 140 881.0 141 905.0 143 2982.0 146 713.0 147 92…	16896	21776	18290	15208	20240	22498	28596	13883	14366	22976	16642	21832	16073	14597	14238	13843	18805	17046	25900	16457	14005	18460	15634	20576	27536	12172	13225	14937	25050	20094	16044	18645	13735	15383	16659	20009	24453	8685	14717	1001	18588
325	367671	unidentified compound			697483	170	367671	85 4363.0 86 2735.0 87 4213.0 88 470.0 90 873.0 91 1240.0 92 99.0 94 734.0 96 370.0 97 1699.0 98 2197.0 99 1276.0 100 4136.0 101 11515.0 102 9349.0 103 41419.0 104 5083.0 106 660.0 108 458.0 109 1137.0 110 491.0 111 5267.0 112 589.0 113 2671.0 115 4713.0 116 7367.0 117 20527.0 118 7155.0 119 3803.0 120 210.0 125 552.0 126 1493.0 127 1260.0 128 503.0 129 41420.0 130 13457.0 131 13637.0 132 3192.0 …	562	938	395	372	153	506	2013	662	603	820	450	548	752	618	611	696	330	461	515	528	419	751	594	1073	1101	876	905	801	612	857	677	807	934	802	869	1368	1018	896	1512	1327	812
326	367665	unidentified compound			625283	204	367665	85 2030.0 87 1239.0 88 1170.0 89 11820.0 90 1101.0 91 557.0 93 783.0 96 1041.0 97 1355.0 100 13558.0 101 6025.0 103 29509.0 104 3040.0 106 996.0 107 628.0 110 2316.0 111 1031.0 112 6662.0 113 1357.0 115 924.0 116 2621.0 117 30002.0 118 2777.0 119 2370.0 121 2619.0 123 177.0 126 2438.0 127 1826.0 128 927.0 131 2682.0 133 10003.0 134 1311.0 135 1567.0 137 308.0 138 897.0 140 381.0 141 344.0 144 438…	5387	1768	2051	494	646	1685	5831	1265	1177	1065	1083	1764	788	4785	1895	1156	1781	1930	1133	977	1696	1523	983	1499	2661	1991	1220	2363	2176	1689	2077	2038	2378	2076	2525	2637	2378	5896	2127	2285	1698
327	367623	unidentified compound			696189	174	367623	85 4189.0 86 16092.0 87 3173.0 88 3666.0 91 1731.0 92 190.0 93 874.0 95 2187.0 97 2813.0 98 836.0 99 1583.0 100 12059.0 101 3638.0 102 5621.0 103 7265.0 104 1419.0 109 403.0 110 456.0 111 7826.0 112 2626.0 113 5940.0 114 2706.0 115 1929.0 116 9417.0 120 213.0 123 222.0 124 227.0 125 430.0 128 2530.0 130 8921.0 131 2593.0 132 7771.0 137 145.0 138 1256.0 139 24320.0 140 1983.0 141 1536.0 142 545.0 …	4985	4249	290	1620	1977	2753	3151	3596	2494	2257	3195	2423	1928	4499	2601	2122	2474	4808	4173	5327	2169	3331	2703	3775	2634	4108	3189	2475	3966	3312	3975	5973	3493	1085	2931	4068	3660	3700	3436	3613	5171
328	367604	unidentified compound			824351	445	367604	85 557.0 86 2524.0 88 680.0 89 2698.0 90 399.0 91 375.0 93 623.0 94 1350.0 95 2017.0 96 1501.0 97 1379.0 101 1619.0 102 1406.0 106 311.0 107 1520.0 108 764.0 109 936.0 110 294.0 112 492.0 113 1122.0 114 1187.0 115 496.0 117 5464.0 118 1078.0 119 561.0 120 650.0 121 720.0 123 409.0 124 786.0 125 1338.0 126 510.0 127 876.0 129 1158.0 130 2112.0 131 544.0 133 1767.0 134 939.0 136 193.0 137 438.0 138…	7280	11758	315	13521	18964	20739	27271	23902	28070	26393	31695	35088	37150	28839	30240	29583	31523	37034	44128	40266	26202	34020	41042	42937	43115	36839	35921	40366	41289	42901	42441	41285	43553	42755	46650	57380	51431	43146	42566	53411	46473
329	367374	unidentified compound			812306	433	367374	85 357.0 86 358.0 88 81.0 103 456.0 110 195.0 114 87.0 116 205.0 121 102.0 128 191.0 130 273.0 131 344.0 133 464.0 134 231.0 140 103.0 144 320.0 147 4138.0 148 698.0 149 236.0 154 309.0 155 281.0 156 110.0 158 63.0 170 171.0 172 227.0 180 40.0 184 66.0 185 222.0 187 56.0 188 79.0 189 59.0 190 144.0 197 225.0 198 56.0 199 69.0 200 133.0 204 150.0 209 73.0 213 109.0 214 129.0 215 191.0 224 31.0 227…	292	320	457	123	333	166	437	412	297	170	329	319	279	304	174	237	303	265	213	422	216	236	275	309	315	284	344	431	314	343	491	354	423	277	345	527	156	320	387	493	406
330	367353	unidentified compound			469880	228	367353	86 87.0 88 480.0 91 633.0 93 162.0 94 170.0 100 918.0 102 591.0 105 359.0 107 106.0 108 207.0 109 268.0 110 4873.0 111 156.0 113 636.0 115 388.0 119 297.0 131 919.0 133 612.0 134 664.0 135 292.0 136 957.0 137 187.0 140 59.0 141 312.0 148 139.0 153 24.0 154 127.0 155 346.0 156 61.0 158 342.0 164 53.0 165 124.0 167 171.0 174 71.0 175 86.0 176 90.0 177 306.0 178 94.0 184 244.0 185 213.0 187 135.0 19…	1202	1059	256	661	629	913	937	1224	546	731	1271	824	958	1159	827	487	958	943	1648	1481	1004	1228	1031	1126	335	1903	1465	1506	1570	1590	1240	1693	1392	1255	2064	2855	1919	2204	1525	1644	1811
331	367348	unidentified compound			541779	259	367348	85 406.0 86 1567.0 87 496.0 88 407.0 94 246.0 95 142.0 96 312.0 97 2062.0 98 662.0 100 11578.0 101 2614.0 102 6209.0 108 78.0 110 552.0 111 232.0 112 135.0 114 313.0 115 1330.0 116 2311.0 117 1646.0 118 667.0 119 593.0 121 140.0 125 116.0 128 743.0 129 1476.0 130 6861.0 131 2070.0 132 600.0 133 2793.0 134 263.0 136 69.0 139 61.0 140 959.0 142 70.0 144 4256.0 145 11058.0 146 1238.0 147 11994.0 148…	1047	528	121	493	642	533	934	696	801	627	824	852	571	884	547	496	720	763	779	935	694	813	450	895	160	1050	843	1093	999	1040	1197	1025	975	839	912	1870	1142	1202	922	1134	1121
332	367338	unidentified compound			529650	307	367338	87 383.0 92 116.0 94 84.0 100 4132.0 103 1090.0 117 1169.0 124 130.0 127 215.0 131 2393.0 133 1720.0 139 79.0 142 184.0 144 109.0 147 20612.0 148 3581.0 149 949.0 157 197.0 161 114.0 168 78.0 172 910.0 173 253.0 174 748.0 175 211.0 187 55.0 188 293.0 189 261.0 190 704.0 191 2593.0 192 552.0 193 206.0 194 51.0 202 1527.0 203 403.0 207 173.0 208 76.0 211 83.0 217 92.0 218 107.0 219 549.0 220 147.0 …	293	859	119	340	627	520	721	965	545	341	598	599	664	637	783	780	514	502	682	880	287	691	665	635	664	553	833	296	380	930	733	1055	874	713	957	1161	769	939	1247	1001	682
333	367310	unidentified compound			939599	290	367310	86 170.0 88 408.0 94 118.0 96 401.0 100 595.0 103 3147.0 109 117.0 110 241.0 114 227.0 116 590.0 117 664.0 124 354.0 125 55.0 126 32.0 130 375.0 137 128.0 138 146.0 139 83.0 141 41.0 142 120.0 144 1558.0 145 124.0 146 43.0 148 98.0 149 164.0 154 27.0 157 73.0 158 422.0 160 149.0 161 164.0 162 79.0 164 37.0 170 109.0 171 755.0 172 345.0 177 72.0 186 116.0 188 82.0 198 48.0 199 81.0 200 40.0 209 87…	411	201	204	564	398	410	702	635	963	806	877	1010	1151	1191	1081	611	983	1413	1329	1393	758	1050	1153	559	1688	1969	1578	1719	1819	1195	2002	1226	1414	1420	1865	3328	1956	2087	1352	2340	2045
334	367110	unidentified compound			782951	278	367110	86 556.0 90 99.0 94 89.0 98 159.0 100 1486.0 101 129.0 102 108.0 103 575.0 104 162.0 105 167.0 106 32.0 108 82.0 114 256.0 115 216.0 130 327.0 132 349.0 133 256.0 137 51.0 139 63.0 145 337.0 146 221.0 147 1651.0 149 142.0 154 46.0 155 32.0 158 101.0 159 48.0 161 77.0 162 118.0 163 138.0 172 637.0 173 127.0 175 88.0 176 15.0 181 33.0 186 63.0 187 212.0 188 700.0 190 363.0 195 59.0 197 91.0 199 380…	971	672	663	393	380	308	738	576	465	599	872	1003	601	1251	625	1211	399	1103	997	1867	463	982	930	1078	1021	1186	1190	573	1148	1810	1132	1583	1061	1138	1053	1951	1426	1399	1488	1331	1696
335	367109	unidentified compound			504620	344	367109	91 541.0 95 328.0 97 791.0 98 207.0 99 10650.0 100 2413.0 103 1187.0 104 71.0 105 206.0 107 376.0 109 403.0 111 200.0 112 344.0 115 237.0 117 2313.0 118 279.0 119 319.0 122 54.0 123 778.0 125 362.0 126 47.0 127 444.0 128 478.0 130 409.0 131 1483.0 133 1793.0 135 389.0 140 404.0 141 713.0 143 109.0 145 342.0 146 490.0 147 6513.0 148 1126.0 149 640.0 153 495.0 154 61.0 157 996.0 158 1310.0 159 143.…	196	643	116	230	609	566	893	930	666	935	755	735	747	690	658	191	1221	1065	1176	1474	1034	753	1487	1237	923	963	1301	1339	1080	1590	1149	1698	1085	1415	1930	1871	1279	1247	1487	1731	1660
336	367061	unidentified compound			227307	258	367061	86 2081.0 87 1538.0 102 181.0 104 90.0 106 160.0 107 5037.0 108 374.0 109 218.0 114 772.0 117 2811.0 118 425.0 120 359.0 121 713.0 122 270.0 125 749.0 126 1262.0 128 113.0 131 3468.0 132 646.0 133 3206.0 134 497.0 135 1065.0 136 390.0 137 3664.0 138 567.0 139 448.0 140 79.0 142 38.0 144 71.0 145 359.0 146 573.0 147 25531.0 148 3519.0 149 2290.0 150 201.0 151 3249.0 152 167.0 155 753.0 158 103.0 1…	781	1010	850	733	823	799	850	1082	878	1372	842	800	820	995	964	758	786	1234	744	892	761	911	761	809	774	954	913	1136	594	889	1022	767	1377	919	969	1308	1084	1624	892	1086	1104
337	366904	unidentified compound			782312	331	366904	86 2081.0 87 1538.0 102 181.0 104 90.0 106 160.0 107 5037.0 108 374.0 109 218.0 114 772.0 117 2811.0 118 425.0 120 359.0 121 713.0 122 270.0 125 749.0 126 1262.0 128 113.0 131 3468.0 132 646.0 133 3206.0 134 497.0 135 1065.0 136 390.0 137 3664.0 138 567.0 139 448.0 140 79.0 142 38.0 144 71.0 145 359.0 146 573.0 147 25531.0 148 3519.0 149 2290.0 150 201.0 151 3249.0 152 167.0 155 753.0 158 103.0 1…	1114	727	785	620	661	501	1375	789	769	1026	1305	824	977	710	1066	1063	848	1201	1102	1188	794	988	789	723	1035	1078	1091	1322	1094	1108	886	1208	729	876	1338	2537	877	1498	1369	1307	871
338	366891	unidentified compound			774863	272	366891	86 2150.0 88 868.0 90 420.0 98 99.0 100 1013.0 101 1000.0 102 853.0 103 252.0 104 254.0 111 1009.0 113 733.0 114 270.0 115 636.0 116 1850.0 117 851.0 118 179.0 119 241.0 123 55.0 125 132.0 126 231.0 127 1642.0 128 3360.0 130 264.0 133 1645.0 139 97.0 141 972.0 142 313.0 143 315.0 144 233.0 146 247.0 149 403.0 154 284.0 155 938.0 156 4648.0 157 3979.0 158 1106.0 159 199.0 160 168.0 161 57.0 162 27…	739	150	529	539	903	1242	2483	1165	1073	1285	1625	1134	1139	752	273	737	817	892	943	1665	784	1593	1441	1293	1555	772	314	1334	1338	1123	545	1197	1150	1310	1015	3453	1893	728	539	2687	2133
339	366551	unidentified compound			755740	209	366551	86:128.0 95:120.0 96:352.0 104:157.0 106:184.0 108:393.0 120:147.0 121:237.0 122:354.0 123:184.0 124:50.0 132:74.0 134:164.0 135:229.0 136:668.0 137:914.0 138:148.0 139:86.0 145:143.0 147:427.0 148:270.0 149:92.0 150:268.0 151:392.0 152:69.0 166:75.0 167:58.0 176:159.0 184:52.0 185:150.0 186:28.0 187:44.0 189:100.0 192:363.0 195:123.0 196:38.0 206:369.0 207:308.0 208:3221.0 209:15534.0 210:2774.0…	3774	3653	2604	5231	6290	6982	5940	5386	6610	4764	6702	6229	8171	3072	2889	8168	6650	5125	8030	7621	4687	6473	8009	7889	8661	2673	2483	8955	7412	6900	7063	6503	6727	8737	4821	6462	4613	3047	3274	6604	6055
340	366463	unidentified compound			416935	164	366463	86:755.0 87:102.0 88:367.0 89:1063.0 90:1129.0 92:140.0 94:130.0 95:128.0 96:631.0 99:216.0 100:3501.0 101:1173.0 102:482.0 103:1157.0 104:1989.0 105:806.0 106:466.0 107:123.0 109:106.0 110:780.0 113:124.0 114:55.0 115:272.0 117:925.0 118:438.0 119:586.0 120:15041.0 121:1771.0 122:661.0 128:186.0 130:182.0 131:615.0 132:301.0 133:833.0 134:164.0 135:293.0 136:34.0 140:130.0 142:285.0 144:104.0 14…	6658	692	2030	3892	3928	3460	3903	3894	2872	3984	4750	3222	3057	11906	3761	4699	3428	4073	4635	4551	3673	1580	5212	4122	6201	8163	3535	2543	2531	6462	3757	4454	4271	4826	5492	9713	4791	15624	4483	3957	5268
341	365155	unidentified compound			798141	290	365155	86:154.0 87:1193.0 88:525.0 89:973.0 94:257.0 99:574.0 100:1309.0 101:2119.0 102:1333.0 103:3161.0 109:80.0 111:197.0 112:288.0 113:967.0 115:787.0 116:2550.0 117:6496.0 118:1176.0 119:304.0 128:1120.0 129:5415.0 131:981.0 133:1386.0 138:34.0 139:144.0 142:538.0 143:2034.0 144:483.0 145:468.0 147:10501.0 148:2603.0 149:2066.0 151:97.0 153:207.0 155:703.0 156:466.0 157:389.0 159:335.0 160:313.0 16…	3304	546	2644	1417	1251	961	7415	1198	1136	1194	2204	1110	902	3532	3217	1056	1208	2586	2821	2929	864	992	2436	1655	3080	4388	2241	840	1946	3886	1599	1359	497	1124	2651	6289	2337	4996	2632	2217	1691
342	365154	unidentified compound			796534	298	365154	85:294.0 88:234.0 89:1671.0 90:341.0 92:351.0 97:149.0 98:156.0 101:1472.0 102:734.0 103:3700.0 104:943.0 105:347.0 106:164.0 108:965.0 111:427.0 112:189.0 113:425.0 114:233.0 115:455.0 117:2585.0 118:525.0 120:422.0 125:184.0 129:3895.0 130:679.0 131:1270.0 133:2776.0 134:391.0 135:297.0 136:722.0 138:111.0 139:125.0 140:181.0 141:240.0 143:1660.0 147:8944.0 148:2352.0 149:1557.0 151:224.0 152:4…	4993	728	3336	2450	2374	2004	8115	2616	2504	3134	3387	1938	2198	5767	3795	2057	2019	3720	3850	3608	1996	2030	4597	2631	5033	6944	2823	1994	3451	4898	3180	3559	3288	2509	4337	9298	2848	8151	3175	3996	2832
343	365015	unidentified compound			444604	157	365015	85:1998.0 86:2507.0 87:623.0 88:244.0 89:18863.0 96:17151.0 97:3462.0 98:1621.0 99:903.0 101:2362.0 111:1850.0 112:157.0 114:1042.0 115:939.0 116:504.0 117:2176.0 118:379.0 125:485.0 127:1245.0 128:586.0 130:3494.0 131:344.0 143:291.0 146:1475.0 157:38621.0 158:7585.0 171:1154.0 172:805.0 186:3933.0 187:847.0 214:5546.0 215:500.0 217:7450.0 218:996.0 259:1266.0	465	500	368	277	510	517	694	935	552	649	1131	717	617	416	467	945	399	410	417	1551	1131	690	342	410	271	582	1239	1117	514	606	465	611	647	555	1753	592	880	1045	1053	601	916
344	364409	unidentified compound			238369	228	364409	86:2278.0 87:1896.0 88:2183.0 89:1599.0 91:4540.0 94:2416.0 97:3763.0 98:1785.0 100:10095.0 101:934.0 102:5157.0 103:11752.0 104:10611.0 105:3115.0 106:32087.0 107:44648.0 114:868.0 115:2740.0 116:124967.0 117:19301.0 118:7132.0 119:956.0 121:6399.0 122:882.0 124:989.0 125:559.0 126:11661.0 127:1201.0 128:5394.0 130:19682.0 132:1616.0 133:7380.0 134:1703.0 135:2341.0 137:1392.0 139:551.0 140:34.0…	1551	3737	5182	2485	4889	9509	4092	6974	4509	7585	6618	5128	12433	3564	6977	10663	4769	4826	6092	4154	3557	2819	6555	6981	5159	1320	5739	10343	3632	6411	5168	6954	6144	6019	2824	2827	5185	2870	7409	3165	5646
345	362287	unidentified compound			812941	204	362287	85:760.0 87:536.0 102:463.0 105:2912.0 109:1064.0 112:1123.0 113:1690.0 115:1278.0 116:4152.0 118:1248.0 127:822.0 129:13532.0 130:5931.0 133:10782.0 134:773.0 142:279.0 143:10917.0 145:3206.0 147:53762.0 149:5921.0 169:6999.0 170:4074.0 173:641.0 175:499.0 191:22367.0 192:2799.0 193:624.0 204:209549.0 205:25453.0 206:5816.0 215:183.0 217:36153.0 218:9182.0 219:3541.0 229:855.0 232:648.0 233:6656…	11047	2134	7920	4971	4652	3800	21196	5356	5541	5645	6412	2535	4517	11854	7298	3957	3530	7353	7339	4991	2878	2854	5908	4936	10940	15041	3922	3193	6320	9362	4804	6960	4784	5261	9700	19301	4192	17107	4700	9209	4276
346	361956	unidentified compound			831580	204	361956	85:13026.0 86:2073.0 87:11730.0 88:3875.0 89:26571.0 90:2009.0 91:22442.0 92:1699.0 93:2138.0 94:1991.0 95:2831.0 97:16393.0 98:6883.0 99:16180.0 100:1399.0 101:45668.0 102:8000.0 103:313135.0 104:29688.0 105:18269.0 107:407.0 109:4821.0 110:321.0 111:8695.0 112:1049.0 113:19702.0 114:3624.0 115:11916.0 116:22685.0 117:73554.0 118:8483.0 119:12741.0 120:1385.0 121:2173.0 122:310.0 123:459.0 124:3…	16686	5448	21198	9467	9422	5683	19611	10893	7476	9857	15968	6677	7286	17565	24083	5512	5890	12656	12658	15416	8124	8087	13422	8243	15038	20541	16324	6817	15783	19830	15730	16457	14845	10164	13376	26229	9592	26360	20137	16692	11380
347	360828	unidentified compound			314257	140	360828	86:220.0 90:392.0 97:203.0 100:487.0 110:805.0 131:265.0 133:238.0 134:853.0 136:15.0 138:98.0 140:5078.0 141:194.0 147:1475.0 148:285.0 149:75.0 151:32.0 152:111.0 153:26.0 158:114.0 159:61.0 163:37.0 167:86.0 184:527.0 185:47.0 186:29.0 200:60.0 215:28.0 216:23.0 224:76.0 227:60.0 230:53.0 259:51.0 261:102.0 262:28.0 379:35.0 421:11.0 452:12.0 482:11.0 486:12.0	3170	3469	2248	2058	822	1007	1735	747	1361	1092	1326	929	1343	1291	1768	1157	1305	1843	1225	1595	1927	2762	985	1266	1080	3366	1632	2084	3849	1510	3417	2429	2215	1111	2121	2253	1911	1930	2616	2115	1109
348	360235	unidentified compound			620545	217	360235	85:2013.0 86:3125.0 87:1383.0 88:1063.0 89:17532.0 90:1122.0 91:645.0 94:417.0 95:75.0 96:681.0 97:1166.0 99:861.0 100:2321.0 101:4559.0 102:1700.0 103:44475.0 104:4031.0 105:7202.0 106:1162.0 107:609.0 109:147.0 110:1292.0 111:2030.0 112:897.0 113:1651.0 114:4569.0 115:1821.0 116:1765.0 117:15749.0 118:1672.0 119:2634.0 120:111.0 121:1886.0 122:174.0 123:161.0 124:214.0 128:715.0 129:34423.0 130…	2213	3671	2583	1514	1986	3212	8039	2822	1597	2290	3501	2962	2733	4724	4043	2627	1268	1442	3151	3948	1608	1694	2646	2483	4508	2215	4259	2709	2504	3417	1908	2532	2407	1985	2225	2041	1303	2185	3586	2602	1985
349	360154	unidentified compound			545613	99	360154	85:296.0 88:59.0 89:1934.0 90:173.0 99:24212.0 101:520.0 102:1718.0 103:18494.0 104:1670.0 105:1368.0 111:485.0 112:270.0 117:1506.0 118:234.0 122:229.0 125:1322.0 126:142.0 129:1254.0 133:3558.0 137:800.0 147:8408.0 148:1624.0 155:3513.0 160:1818.0 161:363.0 163:192.0 176:41.0 189:1521.0 190:198.0 198:220.0 203:122.0 204:418.0 205:462.0 206:254.0 216:164.0 217:7319.0 218:1334.0 219:484.0 222:101…	17665	997	36559	2901	12482	1108	30004	12787	23645	13672	37911	31357	13896	20615	12373	6678	22644	56811	15243	15336	20090	18087	19486	29830	50227	30636	2300	19959	22751	23191	15215	21464	33060	29877	47174	26431	33211	14297	49511	21397	16315
350	359963	unidentified compound			337964	319	359963	85 365.0 86 150.0 87 569.0 93 171.0 98 36.0 101 165.0 102 332.0 103 396.0 104 117.0 105 360.0 106 206.0 107 50.0 108 439.0 109 98.0 110 1745.0 111 252.0 113 229.0 114 146.0 115 841.0 116 952.0 117 426.0 118 308.0 119 399.0 121 71.0 122 88.0 124 102.0 126 111.0 127 189.0 130 2113.0 131 718.0 132 279.0 133 760.0 134 115.0 135 361.0 136 164.0 139 128.0 141 66.0 143 465.0 144 265.0 145 352.0 150 29.0…	2720	2083	837	1276	2065	1752	1764	1670	2656	1551	3030	1364	1237	2269	1758	883	2198	3945	3729	2861	1600	1491	2248	2561	1460	2305	2106	2019	2959	2503	2340	1134	1148	1299	2733	4036	2089	2275	1632	1932	2842
351	359812	unidentified compound			261634	183	359812	85:334.0 86:283.0 88:2340.0 89:767.0 91:162.0 93:486.0 94:381.0 95:827.0 96:825.0 97:5758.0 99:565.0 102:535.0 103:916.0 106:62.0 107:545.0 108:273.0 110:302.0 111:566.0 112:218.0 113:624.0 114:199.0 117:430.0 120:119.0 121:157.0 122:473.0 123:209.0 124:752.0 125:217.0 126:310.0 128:637.0 130:398.0 137:51.0 138:222.0 139:726.0 141:561.0 147:1581.0 148:256.0 154:935.0 155:232.0 157:108.0 163:341.0…	8379	9468	5582	6659	6904	7587	7138	7291	7427	7223	7447	6991	7484	7913	4877	8765	7003	7581	8389	8254	6888	7575	8356	8521	7973	9268	6626	7949	8736	8659	8314	7712	8444	8190	8518	8403	8257	9357	8534	8365	8839
352	357403	unidentified compound			186444	167	357403	85 892.0 87 122.0 88 3689.0 89 9258.0 90 1134.0 91 3836.0 92 738.0 93 6393.0 102 1332.0 105 1875.0 106 1258.0 107 4598.0 108 1380.0 109 1234.0 110 22338.0 114 282.0 115 2228.0 116 978.0 117 4890.0 118 1064.0 119 10144.0 120 1889.0 121 6247.0 122 4744.0 123 6260.0 124 991.0 131 600.0 132 865.0 133 33460.0 134 5804.0 135 2980.0 136 201.0 137 26879.0 138 7589.0 139 3092.0 141 1710.0 142 161.0 143 79…	na	na	na	na	na	na	na	na	na	na	na	na	na	na	na	na	na	na	na	na	na	na	na	na	na	na	na	na	na	na	na	na	na	na	na	na	na	na	na	na	na
353	356984	unidentified compound			312674	261	356984	86:2390.0 87:218.0 88:443.0 90:69.0 96:176.0 99:845.0 100:6622.0 101:827.0 102:391.0 103:494.0 110:1799.0 114:610.0 116:996.0 119:635.0 121:570.0 123:106.0 128:573.0 130:681.0 131:748.0 133:3114.0 134:856.0 135:379.0 142:158.0 144:15241.0 145:2502.0 146:1091.0 147:10924.0 148:1478.0 149:1055.0 150:137.0 151:497.0 152:107.0 156:176.0 158:163.0 160:547.0 161:157.0 162:87.0 163:92.0 164:153.0 166:12…	8135	6254	2987	5841	6745	6192	6882	5879	7122	7482	6707	6690	7104	7610	7034	5779	6528	8125	7818	9198	6083	7109	7119	6582	7470	7825	4115	8162	9347	6743	9005	6077	4023	6883	7844	10384	8762	7528	6748	8555	8640
354	356941	unidentified compound			343519	174	356941	85 2148.0 86 14705.0 87 983.0 88 1082.0 90 270.0 91 276.0 97 246.0 98 717.0 100 15183.0 101 3073.0 105 1231.0 109 934.0 113 214.0 114 1772.0 116 3005.0 117 23514.0 118 1247.0 119 2059.0 120 507.0 124 60.0 129 8268.0 130 2736.0 131 8240.0 132 6601.0 133 10428.0 135 1205.0 143 1044.0 144 516.0 145 2213.0 146 712.0 154 101.0 157 521.0 173 839.0 174 33984.0 175 6780.0 176 2036.0 180 145.0 181 514.0 1…	21726	30352	45266	12241	16198	24614	22808	23049	16795	23600	28773	21511	24324	22016	28205	20632	20895	26212	23647	45283	17676	21012	27250	32541	27561	16814	31554	24617	34044	42676	28136	37155	22957	25085	32227	47973	34249	21994	39606	43626	41535
355	356932	unidentified compound			628655	205	356932	86:428.0 88:225.0 89:2614.0 90:489.0 91:207.0 94:82.0 96:156.0 97:39.0 98:186.0 99:285.0 100:1642.0 101:570.0 103:5616.0 104:327.0 105:472.0 106:127.0 110:475.0 111:126.0 112:1113.0 113:159.0 115:79.0 116:241.0 117:4698.0 118:596.0 119:355.0 120:51.0 121:218.0 123:65.0 124:149.0 126:546.0 127:352.0 128:99.0 129:830.0 131:943.0 132:184.0 133:2524.0 134:671.0 135:257.0 136:83.0 137:94.0 138:257.0 1…	12731	12208	6942	7414	8470	8689	39217	9567	9872	9795	13357	13948	14562	8068	7547	11343	11550	7706	14515	19838	7528	10570	16988	11555	29119	8268	9713	15004	11525	16059	10754	13546	12087	12871	8257	19351	8461	6272	13174	14687	6755
356	356925	unidentified compound			610264	145	356925	85 291.0 86 1097.0 87 1641.0 88 553.0 89 5534.0 90 316.0 91 160.0 97 156.0 100 510.0 101 2115.0 102 247.0 103 6871.0 104 755.0 105 576.0 106 61.0 108 99.0 111 250.0 113 179.0 114 3760.0 115 1803.0 116 2021.0 117 6637.0 118 756.0 119 1094.0 123 69.0 124 134.0 125 120.0 126 166.0 128 145.0 129 3594.0 130 673.0 131 1780.0 132 298.0 133 6570.0 134 835.0 135 998.0 137 146.0 138 38.0 139 71.0 140 108.0…	2588	2339	2352	1826	2042	2235	5024	367	1967	2314	2962	3030	2890	2503	2000	2303	2411	1729	2828	2979	2008	3146	3521	3549	4682	2373	2385	2941	2418	3263	2587	2526	2725	1803	2854	4227	3002	2415	2794	3814	1987
357	356579	unidentified compound			603837	132	356579	87:249.0 90:652.0 95:1040.0 97:500.0 99:225.0 101:1434.0 102:272.0 103:3258.0 104:605.0 105:1820.0 106:460.0 107:86.0 108:76.0 109:322.0 112:46.0 115:181.0 117:12362.0 118:1269.0 119:509.0 120:200.0 121:277.0 122:39.0 123:100.0 125:472.0 127:258.0 129:3225.0 131:1760.0 132:9350.0 133:3144.0 134:761.0 135:506.0 136:167.0 143:1454.0 147:5674.0 148:1574.0 149:568.0 150:388.0 157:523.0 162:40.0 164:1…	3263	3443	7072	1446	1770	1485	2629	2044	1749	2055	2203	2043	2173	2423	2177	1765	1869	2060	2389	2702	2425	2971	1860	2818	2520	2049	3242	2891	2717	2633	3065	2123	2485	2503	2940	3860	2781	2295	4007	3845	2126
358	356364	unidentified compound			595518	244	356364	86:492.0 89:1556.0 90:61.0 91:270.0 103:1691.0 104:266.0 105:705.0 114:220.0 115:163.0 117:710.0 118:248.0 119:99.0 121:145.0 127:219.0 128:138.0 129:669.0 130:251.0 131:420.0 132:114.0 133:1610.0 134:146.0 135:147.0 137:92.0 139:191.0 141:79.0 145:270.0 147:4491.0 148:680.0 149:354.0 151:494.0 152:465.0 153:274.0 154:123.0 155:792.0 157:34.0 160:3442.0 161:477.0 162:74.0 163:98.0 164:19.0 165:14…	2319	3219	2071	1627	1790	1834	6918	1901	2183	2101	2633	2753	2907	2298	2314	2344	2171	2039	2566	2657	1570	2151	2578	2359	3303	1871	2283	2640	1658	2705	1813	2110	2277	2132	2665	3624	2311	1758	2578	2536	1753
359	356291	unidentified compound			371317	194	356291	85:2152.0 88:824.0 89:18144.0 90:3144.0 91:735.0 92:142.0 93:1946.0 94:459.0 95:2583.0 96:5516.0 97:1445.0 98:1397.0 102:803.0 104:1192.0 105:266.0 108:142.0 109:382.0 111:263.0 114:915.0 118:3240.0 119:4204.0 120:970.0 121:106.0 122:467.0 123:195.0 124:14732.0 125:909.0 126:927.0 128:2046.0 129:891.0 130:917.0 131:632.0 133:1103.0 136:1089.0 137:876.0 138:3345.0 139:290.0 141:527.0 142:288.0 143…	2887	4654	2010	2569	2675	2642	2761	2732	2100	3183	3128	2848	2512	3422	3119	2672	2227	2666	3011	3377	2693	3019	3188	2430	2921	2018	3161	2376	2545	2907	2950	3297	2667	2902	2957	2483	3187	2469	2903	2919	2870
360	355607	unidentified compound			792052	255	355607	85:2509.0 86:27476.0 87:6159.0 88:1766.0 89:10635.0 90:1983.0 94:364.0 95:640.0 97:589.0 98:2689.0 99:4560.0 100:29832.0 101:2954.0 102:10193.0 103:46479.0 104:5129.0 105:3798.0 106:188.0 109:339.0 110:918.0 111:957.0 112:3346.0 113:2930.0 114:6380.0 115:8400.0 116:36767.0 117:24099.0 118:3921.0 119:2441.0 122:389.0 124:265.0 126:2754.0 127:1880.0 128:5946.0 129:18203.0 130:14245.0 131:10421.0 13…	277	1506	2940	591	470	391	871	749	174	753	803	663	1148	285	1100	758	758	713	1167	516	698	657	567	1068	666	498	1508	1148	1061	836	692	1048	753	650	1240	1182	602	210	1400	957	1235
361	355384	unidentified compound			188988	186	355384	88 540.0 89 2802.0 91 1151.0 92 241.0 93 8792.0 94 319.0 95 287.0 97 1341.0 99 688.0 102 89.0 103 28214.0 104 2131.0 105 2306.0 107 595.0 109 255.0 112 385.0 115 1381.0 116 713.0 119 965.0 120 676.0 121 256.0 122 441.0 123 700.0 124 135.0 126 51.0 130 472.0 133 2687.0 136 3471.0 137 1994.0 138 667.0 143 97.0 155 2612.0 159 581.0 163 1438.0 165 232.0 166 353.0 167 2975.0 168 766.0 169 260.0 170 34…	na	na	na	na	na	na	na	na	na	na	na	na	na	na	na	na	na	na	na	na	na	na	na	na	na	na	na	na	na	na	na	na	na	na	na	na	na	na	na	na	na
362	354282	unidentified compound			343022	261	354282	85:904.0 87:1069.0 88:2760.0 89:2154.0 90:554.0 91:1079.0 96:631.0 99:1513.0 100:4187.0 102:1353.0 103:10308.0 104:3047.0 105:2067.0 106:464.0 108:205.0 109:487.0 110:7524.0 111:662.0 113:513.0 114:572.0 116:1340.0 117:19312.0 118:3820.0 119:2554.0 120:306.0 121:813.0 122:248.0 124:101.0 129:2989.0 130:1692.0 131:7807.0 132:4317.0 134:2218.0 135:1537.0 141:285.0 143:942.0 144:738.0 145:1418.0 146…	4347	3363	1825	2365	3061	2026	2204	2455	3226	2487	3393	2567	2525	3014	2504	1935	2026	2893	3984	4990	2532	3880	2547	3299	4139	3927	2505	3676	6139	2571	4236	1981	4359	2720	3093	4057	4367	2893	3185	4275	4581
363	354269	unidentified compound			193096	262	354269	87 344.0 97 940.0 100 7637.0 101 605.0 102 909.0 103 459.0 104 268.0 105 162.0 106 50.0 115 1153.0 117 771.0 118 191.0 120 536.0 121 248.0 122 345.0 126 329.0 131 2114.0 133 343.0 135 649.0 136 69.0 137 63.0 141 120.0 143 190.0 145 392.0 147 21908.0 148 3120.0 149 1450.0 150 241.0 151 6482.0 152 2528.0 153 741.0 154 374.0 159 442.0 168 1038.0 169 49.0 170 467.0 174 6219.0 175 1040.0 176 576.0 178…	na	na	na	na	na	na	na	na	na	na	na	na	na	na	na	na	na	na	na	na	na	na	na	na	na	na	na	na	na	na	na	na	na	na	na	na	na	na	na	na	na
364	353342	unidentified compound			311099	231	353342	85:13254.0 86:36483.0 87:16438.0 88:3979.0 89:4311.0 90:12244.0 91:14959.0 92:4029.0 94:5481.0 95:2283.0 96:1948.0 97:3006.0 98:2545.0 99:31324.0 100:433141.0 101:44667.0 102:22158.0 103:8990.0 104:23469.0 105:7438.0 106:1681.0 107:2022.0 108:1173.0 111:744.0 112:593.0 113:4671.0 114:5134.0 115:17509.0 116:170140.0 117:31982.0 118:8503.0 119:3540.0 120:162305.0 121:15446.0 122:9643.0 123:1959.0 1…	91225	130388	98463	28008	27224	39474	29983	27420	23702	27099	71361	19929	15859	47318	35175	27611	27410	70482	96597	51423	12972	36446	40480	44191	31845	54209	32531	17503	24337	57923	12127	19752	16572	20435	33480	20121	17920	34252	61854	20306	31144
365	351222	unidentified compound			250484	245	351222	85:8116.0 92:1253.0 94:509.0 96:318.0 97:548.0 98:1550.0 99:11644.0 103:2632.0 105:1536.0 106:345.0 107:7115.0 108:1443.0 109:249.0 110:564.0 111:2036.0 112:394.0 113:3835.0 115:43380.0 116:17673.0 117:4269.0 124:105.0 125:695.0 126:917.0 127:7145.0 128:2134.0 129:1818.0 132:3958.0 138:126.0 139:3480.0 140:821.0 141:3018.0 142:1238.0 143:2019.0 144:1875.0 145:786.0 151:395.0 152:254.0 153:172.0 1…	2030	1778	1156	1402	1870	1929	2329	2049	2360	2080	4382	1621	1428	2916	2863	89	2512	5331	4914	143	1782	1934	3710	3118	2897	2691	3073	2855	3414	4303	2599	2378	1680	2446	4204	6627	3298	3738	4124	3090	4919
366	351064	unidentified compound			736924	360	351064	85:3643.0 86:2382.0 87:1163.0 88:1327.0 89:563.0 90:453.0 91:184.0 93:309.0 94:491.0 95:512.0 97:311.0 98:1361.0 99:3344.0 100:6074.0 101:1823.0 102:3926.0 103:1271.0 104:1108.0 106:228.0 107:224.0 108:188.0 110:304.0 111:703.0 112:976.0 113:30182.0 114:3117.0 115:2372.0 116:724.0 117:1505.0 118:525.0 119:342.0 120:214.0 121:226.0 122:99.0 124:1993.0 125:465.0 126:708.0 127:803.0 128:895.0 129:61…	3516	2594	2057	1661	4207	4021	4943	2540	2799	2626	3560	2898	3163	2860	2335	2162	3825	4327	4628	3267	2109	3107	4406	3930	3467	3443	2892	5472	4276	3872	2470	2683	3106	3089	4676	5719	3210	2688	3020	3473	3917
367	350770	unidentified compound			205294	142	350770	85:231.0 86:893.0 87:2642.0 88:906.0 89:260.0 91:858.0 92:270.0 93:2092.0 94:295.0 98:902.0 99:1284.0 100:517.0 101:461.0 102:551.0 103:12804.0 104:1157.0 114:4882.0 115:1204.0 116:224.0 118:511.0 122:458.0 123:1228.0 124:449.0 125:579.0 126:134.0 129:296.0 130:5006.0 131:1123.0 132:1225.0 137:85.0 141:92.0 142:12634.0 143:2588.0 144:1198.0 145:307.0 146:3727.0 153:282.0 154:272.0 158:54.0 160:50…	na	na	na	na	na	na	na	na	na	na	na	na	na	na	na	na	na	na	na	na	na	na	na	na	na	na	na	na	na	na	na	na	na	na	na	na	na	na	na	na	na
368	348839	unidentified compound			451193	156	348839	85:1155.0 86:32.0 87:191.0 89:268.0 90:146.0 94:377.0 96:210.0 97:488.0 98:694.0 99:1042.0 100:1730.0 101:1379.0 102:343.0 104:416.0 105:157.0 109:82.0 111:76.0 112:499.0 113:372.0 115:317.0 116:243.0 122:157.0 124:1386.0 125:181.0 126:701.0 127:203.0 128:556.0 129:2322.0 130:255.0 133:841.0 134:248.0 140:2608.0 141:414.0 142:124.0 143:236.0 147:4296.0 148:708.0 149:534.0 152:65.0 155:183.0 156:1…	464	375	309	295	501	548	320	440	341	301	523	507	415	456	556	494	714	511	554	965	609	556	634	865	634	443	730	624	884	998	772	812	791	642	898	1256	1230	845	1082	994	1574
369	348008	unidentified compound			866097	373	348008	85:1375.0 86:711.0 87:317.0 88:496.0 89:448.0 93:719.0 96:1080.0 97:1252.0 98:1107.0 99:346.0 101:502.0 102:364.0 104:476.0 107:476.0 108:462.0 109:715.0 110:160.0 111:2376.0 112:324.0 113:1249.0 115:482.0 116:1260.0 117:1751.0 121:343.0 123:230.0 124:143.0 125:676.0 126:190.0 129:1745.0 130:420.0 131:868.0 132:730.0 133:1150.0 137:460.0 139:700.0 140:238.0 142:249.0 143:187.0 144:1048.0 145:705.…	533	550	1312	607	910	846	1150	1112	1163	1201	1274	1403	1513	1150	1186	1276	1366	1658	1775	1915	1270	1509	1894	2091	2061	1796	1587	1771	1909	2046	2042	1981	2174	1986	2195	2933	2614	2223	2006	2840	2401
370	347980	unidentified compound			821113	343	347980	85:1575.0 86:413.0 88:838.0 93:339.0 95:2145.0 97:1080.0 99:393.0 103:1059.0 108:295.0 109:1425.0 111:315.0 113:477.0 114:113.0 116:537.0 117:491.0 119:319.0 123:464.0 125:188.0 128:1145.0 134:253.0 137:448.0 139:389.0 142:195.0 144:725.0 145:200.0 147:2469.0 148:440.0 153:413.0 154:265.0 155:330.0 158:489.0 160:225.0 164:97.0 165:155.0 168:108.0 169:306.0 170:226.0 181:61.0 182:87.0 183:144.0 18…	1056	699	184	404	520	480	600	534	447	557	678	668	608	573	584	528	591	706	853	1163	620	732	950	951	919	791	642	842	779	952	911	782	970	781	880	1328	949	939	896	932	935
371	347979	unidentified compound			425646	140	347979	90:1944.0 96:314.0 97:729.0 112:780.0 119:308.0 139:92.0 140:17949.0 141:894.0 146:160.0 154:382.0 155:746.0 167:717.0 168:819.0 180:220.0 181:435.0 196:172.0 203:102.0 212:95.0 224:3953.0 225:208.0 228:870.0 234:52.0 236:69.0 243:65.0 293:121.0 295:100.0 356:59.0 372:35.0 378:31.0 382:28.0 387:45.0 407:33.0 411:44.0 414:39.0 443:46.0 488:37.0 499:41.0	2669	2484	1144	1351	1184	1040	1898	1139	1113	1060	2227	1153	1384	2074	2417	1229	1742	1646	1723	1683	1854	2711	1564	1558	1700	4154	2716	1967	3080	1860	2887	2856	2269	2255	3143	3367	2399	4028	3577	2643	2644
372	347424	unidentified compound			758120	202	347424	85:1971.0 89:2040.0 90:1097.0 91:4269.0 100:8082.0 101:3306.0 102:2346.0 105:1035.0 115:2826.0 117:2535.0 118:985.0 120:3008.0 129:4453.0 130:10115.0 131:2849.0 134:904.0 140:1379.0 141:1387.0 145:1624.0 146:2977.0 147:4618.0 150:839.0 154:1995.0 168:616.0 169:663.0 170:1201.0 171:1018.0 173:761.0 183:998.0 184:776.0 185:1121.0 186:842.0 187:839.0 188:1229.0 189:942.0 192:14144.0 193:3220.0 194:4…	4214	4913	2779	2729	6140	3409	4872	3488	3964	3390	4774	7207	5934	2569	3121	4244	4465	4673	9644	8025	2652	7447	7504	6210	7871	2283	3324	4225	7946	6130	5066	5395	4807	5870	2907	5649	4649	2884	5267	5260	4884
373	347328	unidentified compound			188988	146	347328	86 4957.0 87 2832.0 88 634.0 89 1197.0 90 314.0 91 643.0 102 97.0 104 966.0 106 716.0 111 163.0 115 1491.0 116 332.0 117 3118.0 118 648.0 119 11470.0 120 1939.0 121 3276.0 122 360.0 123 2363.0 130 718.0 131 1214.0 132 311.0 133 5511.0 135 1786.0 136 586.0 137 4386.0 138 390.0 144 82.0 145 58.0 146 56498.0 147 6518.0 148 4375.0 150 843.0 151 2270.0 153 181.0 155 604.0 160 442.0 161 1042.0 164 382.…	na	na	na	na	na	na	na	na	na	na	na	na	na	na	na	na	na	na	na	na	na	na	na	na	na	na	na	na	na	na	na	na	na	na	na	na	na	na	na	na	na
374	346794	unidentified compound			295349	107	346794	92:2564.0 94:372.0 95:247.0 99:3482.0 100:283.0 107:37949.0 108:2563.0 109:393.0 112:131.0 118:185.0 123:41.0 124:49.0 130:581.0 135:5158.0 136:318.0 141:124.0 142:443.0 148:159.0 153:86.0 157:163.0 185:303.0 189:72.0 204:990.0 205:86.0 264:81.0 277:36.0 293:38.0 299:33.0 318:35.0 370:28.0 385:30.0 407:12.0 409:23.0 415:40.0 432:31.0 448:16.0 450:34.0 458:18.0 461:12.0 462:54.0 463:51.0 480:28.0 …	3222	3381	3060	2696	2514	2274	2368	2585	2417	2643	3183	2222	2462	2631	2800	2903	2215	2877	2987	2615	1788	2201	2682	2236	3038	3214	2806	2679	2844	2797	3022	3060	3103	2613	2979	2804	2877	3110	3283	2635	2528
375	346781	unidentified compound			253120	267	346781	85 28953.0 86 4099.0 87 45659.0 88 13750.0 89 15293.0 90 577.0 91 304.0 94 906.0 95 74.0 96 11071.0 97 3873.0 98 1605.0 99 6998.0 100 101.0 101 2897.0 102 4400.0 103 37257.0 104 18110.0 105 17049.0 106 2911.0 107 1532.0 109 2350.0 111 18912.0 112 9461.0 113 2030.0 114 526.0 115 15224.0 116 2499.0 117 9709.0 118 16827.0 119 38281.0 120 5074.0 121 11242.0 122 890.0 123 878.0 124 916.0 125 27377.0 1…	2287	2409	2014	1934	1742	1892	2439	2319	2315	2470	2162	2678	2969	2793	2700	3260	2738	3459	2619	2905	4116	4635	5097	5081	5034	3913	5201	5713	5984	5943	5242	5823	7249	6804	7649	7982	6521	7940	8685	7434	10020
376	346561	unidentified compound			293049	139	346561	88:139.0 90:252.0 91:334.0 92:1579.0 93:568.0 94:729.0 95:679.0 96:1959.0 97:3696.0 98:1104.0 99:524.0 102:420.0 103:505.0 106:4066.0 109:903.0 110:588.0 112:333.0 113:82.0 116:565.0 117:581.0 118:281.0 125:65.0 126:25904.0 127:17741.0 128:437.0 139:17640.0 140:6836.0 141:468.0 142:165.0 143:385.0 154:359.0 156:191.0 157:109.0 158:139.0 160:237.0 170:330.0 172:82.0 178:47.0 181:84.0 183:1412.0 18…	33840	42774	26642	39311	42268	35399	59022	40620	41843	38660	34238	43771	42427	31279	48270	41246	37056	39055	36784	39841	40157	37794	36182	31994	42587	30128	45040	47180	44767	36541	57241	41402	47270	44202	41065	50513	45150	32513	39645	45298	42215
377	346248	unidentified compound			295999	132	346248	85:1647.0 86:4931.0 87:2070.0 89:35509.0 90:2224.0 91:1835.0 99:617.0 101:2888.0 102:5983.0 104:2949.0 105:234.0 106:363.0 111:46.0 115:2004.0 116:1029.0 118:304.0 119:2252.0 124:34.0 130:4557.0 131:842.0 132:100986.0 133:2260.0 135:374.0 138:66.0 142:1226.0 145:231.0 146:8.0 150:50.0 152:140.0 158:314.0 162:111.0 171:904.0 176:557.0 191:789.0 192:150.0 212:36.0 218:84.0 240:45.0 241:131.0 243:49…	5819	3685	4580	1941	2315	2755	2740	3730	2617	3480	3600	2297	2438	5098	3365	2694	2981	3830	3439	4382	3806	4389	4434	4105	4051	6111	3539	3696	3652	3558	3807	3581	3852	3268	4414	4966	3385	3595	3035	3643	2436
378	345452	unidentified compound			530741	198	345452	85:370.0 91:176.0 92:164.0 93:354.0 94:210.0 95:294.0 97:321.0 103:134.0 105:63.0 107:63.0 108:364.0 109:931.0 110:481.0 111:222.0 112:91.0 113:386.0 117:870.0 119:37.0 121:74.0 122:22.0 129:401.0 131:150.0 133:515.0 135:231.0 136:96.0 139:218.0 141:40.0 144:205.0 147:9121.0 148:1126.0 149:809.0 151:47.0 152:40.0 154:510.0 155:467.0 156:67.0 157:190.0 159:162.0 160:23.0 161:44.0 162:37.0 163:51.0…	521	996	939	287	416	510	322	298	323	1113	662	561	516	652	456	342	536	853	339	775	200	503	699	443	473	1158	786	668	567	912	229	1899	1349	1648	1442	1380	574	698	1028	423	960
379	345411	unidentified compound			760090	170	345411	85:763.0 87:719.0 93:568.0 94:165.0 95:982.0 96:1442.0 97:4458.0 98:754.0 99:834.0 101:629.0 102:138.0 107:224.0 108:1180.0 109:982.0 110:334.0 111:3151.0 112:682.0 113:1041.0 114:177.0 115:67.0 117:1168.0 118:253.0 121:556.0 122:87.0 123:209.0 124:236.0 125:1171.0 126:4077.0 127:2033.0 128:683.0 129:556.0 130:507.0 131:218.0 132:303.0 133:316.0 134:50.0 137:77.0 138:171.0 139:3330.0 140:596.0 14…	2538	2998	351	2902	3459	4876	7391	6025	4313	6118	5856	8089	8315	5532	7381	7473	7497	9410	10896	9069	5010	6053	8049	8006	11349	9636	8528	7644	8102	8124	10236	9573	8798	8178	8295	10812	12954	10616	10162	9913	8441
380	344959	unidentified compound			611213	295	344959	85:662.0 89:3774.0 90:439.0 91:747.0 92:285.0 96:222.0 99:709.0 102:177.0 103:12753.0 104:6766.0 105:1475.0 107:346.0 110:216.0 116:1514.0 117:3103.0 118:416.0 119:996.0 120:207.0 121:437.0 126:704.0 131:855.0 133:2545.0 134:1357.0 135:3325.0 136:364.0 140:2220.0 147:6433.0 148:1467.0 149:1155.0 150:325.0 151:319.0 157:291.0 158:646.0 160:1385.0 161:104.0 163:462.0 164:102.0 173:110.0 176:85.0 17…	6068	3434	1825	1996	1983	2817	2248	1961	1943	2302	2097	1958	2225	2239	1603	1715	1756	1524	2328	10927	2732	2166	2227	2516	2001	1798	1650	2299	1630	2899	1688	1672	1394	1592	1454	2325	1751	1788	1507	1540	1583
381	344945	unidentified compound			191668	160	344945	85 3665.0 86 5756.0 87 2084.0 88 409.0 89 401.0 99 1486.0 100 7313.0 101 1627.0 102 1110.0 103 286.0 105 1096.0 111 4837.0 113 19970.0 114 3741.0 115 2737.0 116 1913.0 117 3283.0 118 522.0 119 278.0 125 1160.0 128 3327.0 129 1098.0 131 6294.0 132 8633.0 133 3667.0 136 56.0 144 379.0 145 209.0 147 49852.0 148 5894.0 149 3851.0 150 346.0 159 179.0 160 28594.0 161 4355.0 162 2025.0 166 81.0 167 50.0…	na	na	na	na	na	na	na	na	na	na	na	na	na	na	na	na	na	na	na	na	na	na	na	na	na	na	na	na	na	na	na	na	na	na	na	na	na	na	na	na	na
382	342534	unidentified compound			550759	238	342534	90:274.0 95:95.0 99:78.0 100:1054.0 101:740.0 102:988.0 103:589.0 104:641.0 105:113.0 106:153.0 107:154.0 112:454.0 114:69.0 115:329.0 116:411.0 117:458.0 118:372.0 121:3196.0 122:263.0 123:332.0 124:63.0 129:313.0 130:503.0 131:6293.0 132:1527.0 133:1472.0 134:334.0 147:2878.0 148:682.0 149:1044.0 150:196.0 151:98.0 152:150.0 154:71.0 158:244.0 164:70.0 166:109.0 169:111.0 170:33.0 174:994.0 175…	2540	1134	919	5385	5204	3408	5333	4105	4440	2619	3683	4360	4009	1588	1071	6217	4845	3327	3918	3846	4869	2312	2509	4563	5229	2820	1358	2944	6082	5182	4309	4421	3872	4560	5091	5448	6048	1109	1045	3820	3020
383	342230	unidentified compound			433094	309	342230	89:1525.0 90:501.0 91:1395.0 94:515.0 98:1558.0 99:1375.0 100:21291.0 101:3752.0 102:4853.0 103:2787.0 104:1191.0 105:1671.0 106:244.0 111:826.0 114:1108.0 115:1803.0 116:15151.0 117:19699.0 119:1773.0 120:414.0 121:440.0 128:2822.0 130:25536.0 131:9697.0 132:4417.0 133:5496.0 134:585.0 136:258.0 138:1275.0 141:435.0 144:4217.0 145:1149.0 146:506.0 147:15956.0 148:3785.0 149:1484.0 150:731.0 151:…	394	632	59	163	372	482	768	994	1012	713	859	1024	941	702	925	1212	435	1629	1671	1039	1205	1528	1462	1578	1858	1344	1729	2454	2971	545	1870	2625	2053	1939	2429	3201	2331	1507	2212	3329	4144
384	341366	unidentified compound			731333	287	341366	86:431.0 87:928.0 88:359.0 89:345.0 90:1032.0 91:196.0 93:64.0 95:157.0 96:289.0 97:434.0 98:1172.0 99:913.0 100:1643.0 102:11752.0 103:1761.0 104:460.0 105:548.0 107:228.0 108:143.0 109:339.0 110:489.0 111:406.0 112:601.0 113:333.0 114:316.0 115:747.0 116:842.0 117:1709.0 118:172.0 119:97.0 120:30.0 124:237.0 125:355.0 126:670.0 128:703.0 130:383.0 132:377.0 133:1587.0 134:339.0 135:172.0 137:12…	701	695	498	188	439	962	260	845	683	605	683	555	888	932	507	548	524	1249	893	1024	432	512	1477	1354	1078	358	1495	1465	566	1625	447	895	1022	1099	1172	1085	1076	722	694	1294	1425
385	341332	unidentified compound			491122	198	341332	85:833.0 86:2858.0 88:1300.0 89:383.0 90:618.0 91:1116.0 92:227.0 93:3246.0 94:264.0 95:484.0 96:2689.0 97:1007.0 98:7366.0 99:928.0 100:2995.0 101:1417.0 102:428.0 104:879.0 105:1333.0 106:2184.0 107:316.0 108:42.0 110:191.0 111:1237.0 113:1326.0 114:1523.0 115:1505.0 116:1353.0 117:2515.0 118:473.0 120:4178.0 121:2154.0 122:318.0 123:194.0 124:53.0 125:422.0 126:2298.0 127:244.0 130:10896.0 131…	1408	1432	274	1257	1634	1333	2300	2999	2232	2178	2404	2008	2936	2441	1874	3036	1882	2937	2660	4006	2889	2811	3893	4342	2840	3297	2616	3420	2430	3794	3071	5164	5538	3796	4856	4033	4532	3918	4199	3954	5316
386	330215	unidentified compound			616802	287	330215	86 569.0 87 525.0 88 786.0 91 341.0 93 241.0 95 227.0 96 570.0 97 1243.0 98 269.0 99 905.0 100 1439.0 102 799.0 103 1482.0 104 503.0 105 137.0 106 220.0 111 816.0 114 236.0 115 469.0 116 3161.0 118 590.0 119 1041.0 120 495.0 123 108.0 124 110.0 125 279.0 128 154.0 129 638.0 130 1343.0 131 2696.0 132 961.0 133 1889.0 135 362.0 140 216.0 141 221.0 142 34.0 143 1368.0 144 5459.0 145 581.0 146 474.0 …	2039	22457	705	1171	1137	2126	1582	1491	1890	1347	1726	2180	2086	2026	17170	1837	1568	1536	1577	2603	1617	1860	2281	1972	2004	2196	19418	2713	1721	2362	1671	2651	1956	1809	2028	2546	2036	2452	19459	2655	3111
387	329435	unidentified compound			799351	160	329435	85 876.0 87 1053.0 88 714.0 89 7088.0 90 350.0 93 539.0 94 590.0 95 1103.0 96 1581.0 97 1128.0 98 24015.0 99 2937.0 100 1582.0 101 1933.0 102 1174.0 103 29849.0 104 3086.0 105 863.0 107 501.0 109 426.0 110 403.0 111 624.0 112 643.0 113 677.0 114 909.0 115 500.0 116 1486.0 117 10690.0 118 1232.0 119 1178.0 121 302.0 122 312.0 123 265.0 124 319.0 125 1206.0 126 670.0 128 1164.0 129 6828.0 130 1592.…	942	4688	9090	1013	1322	1090	2792	1488	1380	1873	2269	1758	1310	1232	2327	1847	1915	2108	3027	3163	1135	1974	2099	2036	2094	1287	4251	1642	1758	2492	1363	1797	1849	1484	1818	2357	2264	1208	4122	6036	5853
388	325327	unidentified compound			704224	160	325327	85:45.0 86:342.0 87:161.0 88:495.0 89:258.0 90:39.0 91:39.0 92:64.0 93:48.0 98:10.0 99:12.0 100:351.0 101:48.0 102:130.0 103:325.0 104:30.0 114:82.0 115:281.0 116:169.0 117:739.0 118:456.0 119:356.0 120:69.0 129:55.0 130:76.0 131:468.0 132:487.0 133:1117.0 134:786.0 135:221.0 136:28.0 137:9.0 142:45.0 143:139.0 144:190.0 145:52.0 146:134.0 147:2119.0 148:1325.0 149:794.0 150:243.0 151:44.0 152:19…	9556	1676	2271	4958	5075	4704	3592	4423	4204	4869	6722	3560	4733	13104	4737	5385	3772	7211	6105	6254	3776	3244	5668	4827	4635	9135	3762	3506	5187	8173	4920	6777	4689	5442	5254	7865	6053	15395	5365	6358	6989
389	325313	unidentified compound			650985	185	325313	85:3647.0 86:4128.0 87:4218.0 88:3152.0 89:30843.0 90:1924.0 91:1123.0 92:514.0 93:564.0 94:743.0 95:527.0 96:1273.0 97:1644.0 98:687.0 99:2254.0 100:4130.0 101:10026.0 102:3330.0 108:245.0 109:141.0 110:330.0 111:1004.0 113:1454.0 115:2995.0 116:2907.0 122:127.0 123:210.0 124:844.0 125:679.0 126:756.0 127:1398.0 131:9361.0 133:22148.0 137:87.0 138:248.0 139:393.0 140:317.0 141:553.0 142:1329.0 1…	42074	44238	43314	48123	55628	52243	29635	60988	57319	60716	58060	56310	56583	54689	49868	68529	47225	45802	56013	63436	45934	43132	56554	51559	39149	34133	50027	45019	49075	61315	45243	61374	47660	59240	49798	46092	48475	48296	55643	56192	73555
390	324802	unidentified compound			775065	185	324802	86:68.0 100:115.0 101:35.0 110:37.0 111:18.0 130:61.0 132:87.0 139:35.0 147:132.0 148:93.0 153:61.0 154:33.0 155:117.0 156:21.0 161:36.0 166:33.0 168:53.0 170:57.0 172:22.0 180:24.0 184:262.0 185:3403.0 186:476.0 187:114.0 188:22.0 197:52.0 199:40.0 218:14.0 219:24.0 225:15.0 228:69.0 229:21.0 241:40.0 248:14.0 282:21.0 284:16.0 286:13.0 287:61.0 288:21.0 298:23.0 299:257.0 300:87.0 301:25.0 308:…	1130	192	979	1116	1582	1249	1293	1428	6469	1297	1737	996	748	3039	921	1266	1126	2206	977	1936	1383	769	1291	1562	1552	3217	826	931	1605	1337	1387	1024	1025	1354	1851	1531	1641	1950	1215	1315	1943
391	324797	unidentified compound			517836	284	324797	85:72.0 86:132.0 87:139.0 88:196.0 89:50.0 90:2265.0 91:71.0 93:13.0 98:74.0 99:120.0 100:809.0 101:369.0 102:337.0 103:183.0 104:209.0 105:51.0 106:185.0 109:18.0 110:39.0 111:43.0 112:41.0 113:128.0 115:84.0 116:67.0 117:321.0 118:92.0 119:128.0 120:36.0 122:3009.0 123:160.0 126:119.0 127:156.0 130:36.0 131:734.0 132:878.0 133:1122.0 134:732.0 135:207.0 136:75.0 137:28.0 143:103.0 145:133.0 147…	39731	2348	6414	9883	10502	8474	15884	10449	8513	10529	11661	8052	9005	35516	9482	10526	7942	10903	11205	11149	7216	6798	11880	9870	19308	40837	7050	7210	12868	14571	12418	13051	9792	11044	15175	25756	9355	38758	9629	10858	10052
392	324787	unidentified compound			472147	105	324787	87:658.0 88:857.0 101:2673.0 102:2008.0 103:6085.0 104:3714.0 105:15418.0 106:833.0 109:64.0 111:1315.0 116:2353.0 117:3984.0 118:810.0 120:107.0 122:49.0 123:28.0 131:1042.0 132:501.0 138:109.0 146:319.0 147:2435.0 148:633.0 151:181.0 160:104.0 161:470.0 162:99.0 164:123.0 165:68.0 168:25.0 175:40.0 176:347.0 177:364.0 178:1404.0 179:455.0 181:1714.0 182:265.0 183:82.0 185:112.0 186:101.0 194:20…	26806	24161	20517	28999	35220	32292	33376	43551	36717	39906	42968	37721	32381	39357	30863	48447	38658	44024	42457	57195	52596	38787	47273	51508	34299	40426	44897	48714	44041	54027	51266	68298	58472	55064	60581	79506	53832	54217	52464	52486	66481
393	324767	unidentified compound			572435	121	324767	86:74.0 87:111.0 88:12.0 89:121.0 90:119.0 91:29.0 96:59.0 100:60.0 102:165.0 103:1638.0 104:253.0 105:139.0 108:29.0 114:41.0 115:53.0 116:27.0 119:117.0 120:50.0 121:3627.0 122:331.0 123:149.0 127:83.0 129:600.0 130:128.0 131:712.0 132:79.0 133:996.0 134:215.0 135:28.0 141:24.0 145:71.0 147:5620.0 148:1023.0 149:538.0 150:94.0 152:19.0 158:57.0 160:22.0 161:112.0 172:12.0 174:34.0 176:8.0 181:8…	72928	5027	14015	19906	15878	13583	25669	17013	12659	16699	19046	16448	14879	60672	16050	16014	14424	19189	18925	20632	14900	11714	18465	15970	27742	72745	12767	11865	20908	24421	20314	20295	17056	16640	22907	42133	17479	68868	16065	17375	17829
394	324766	unidentified compound			493468	106	324766	85:985.0 86:267.0 89:99.0 90:163.0 93:16.0 99:354.0 100:1805.0 101:686.0 102:153.0 103:158.0 104:193.0 105:157.0 106:5563.0 107:301.0 111:117.0 114:65.0 115:111.0 116:81.0 117:318.0 118:102.0 120:96.0 126:73.0 127:160.0 131:608.0 132:157.0 133:686.0 134:324.0 135:89.0 136:539.0 137:136.0 138:19.0 141:50.0 147:3877.0 148:937.0 149:525.0 150:151.0 151:15.0 153:17.0 174:219.0 175:108.0 177:137.0 178…	109078	5751	15034	31521	24899	21467	41942	27083	21576	24318	30488	19201	23083	78728	22781	25192	22303	25116	28071	32177	23091	20653	28509	24228	48111	101574	16879	17331	38439	37335	33723	34780	25137	28874	34088	58695	26093	79273	22365	27920	24689
395	324429	unidentified compound			778052	204	324429	85:3433.0 86:7905.0 87:4663.0 88:2527.0 89:3633.0 90:1670.0 99:4066.0 100:3513.0 101:25508.0 102:6690.0 103:182657.0 104:17369.0 105:5421.0 113:2466.0 114:2244.0 115:3841.0 116:15500.0 118:7286.0 119:5149.0 127:284.0 128:1316.0 129:48747.0 130:11529.0 131:20276.0 132:8462.0 133:33647.0 134:2572.0 139:2026.0 141:1829.0 142:542.0 143:9222.0 144:3668.0 147:119146.0 148:19911.0 149:14363.0 153:732.0 …	95550	21238	88240	34260	30613	32193	103657	31895	30535	41836	46949	30639	35203	103673	84725	32111	28746	52548	48501	64413	34687	32036	70107	35663	83393	123539	64004	34837	50918	90681	48604	52538	38739	46375	77021	159817	47409	139868	74572	68354	53080
396	320847	unidentified compound			498760	166	320847	85:2137.0 86:1293.0 87:216.0 88:175.0 89:252.0 92:77.0 94:68.0 96:596.0 97:85.0 98:123.0 99:791.0 101:410.0 102:610.0 103:1000.0 104:147.0 106:168.0 107:363.0 110:125.0 111:271.0 113:661.0 114:394.0 115:401.0 120:234.0 121:134.0 125:47.0 126:978.0 127:492.0 128:1336.0 130:913.0 131:523.0 132:227.0 133:149.0 138:607.0 139:303.0 142:150.0 144:236.0 146:659.0 147:3011.0 148:929.0 149:346.0 154:130.0…	2901	5434	10560	6970	9832	8114	5059	7868	4052	8940	9970	10321	6709	6238	7494	7670	5683	7101	10112	5544	5135	4130	6093	7032	6991	2581	7690	5885	4550	6438	4441	6534	5492	5821	7123	7247	8703	3652	6816	8050	9007
397	320314	unidentified compound			454482	220	320314	85:62.0 86:139.0 87:313.0 88:1915.0 89:209.0 90:128.0 91:49.0 94:52.0 96:47.0 97:27.0 99:23.0 100:492.0 101:522.0 102:442.0 103:934.0 104:226.0 105:211.0 106:35.0 107:47.0 108:35.0 113:10.0 114:34.0 115:143.0 116:207.0 117:531.0 118:171.0 119:93.0 120:63.0 121:44.0 123:25.0 126:71.0 127:62.0 130:101.0 131:580.0 132:939.0 133:740.0 134:730.0 135:137.0 136:64.0 138:11.0 143:33.0 144:1209.0 145:135.…	88835	16597	13070	29500	31122	28861	38693	37036	37593	46036	39921	31363	34477	86753	27355	43043	34122	44548	41044	50311	36107	35604	45629	42831	53309	98332	31349	37020	49993	53610	47066	53526	44187	42713	53479	86992	46657	92516	36977	52507	57370
398	319248	unidentified compound			257329	131	319248	85:66.0 95:105.0 99:80.0 101:113.0 109:20.0 115:170.0 117:79.0 129:47.0 130:33.0 131:5305.0 132:590.0 133:459.0 134:59.0 135:19.0 138:19.0 143:110.0 154:21.0 157:20.0 161:36.0 166:26.0 169:15.0 183:18.0 189:25.0 191:22.0 205:305.0 206:21.0 207:38.0 208:40.0 232:18.0 233:108.0 264:16.0 274:25.0 289:18.0 290:19.0 319:23.0 344:17.0 363:21.0 369:31.0 372:16.0 384:22.0 393:19.0 400:16.0 403:16.0 412:2…	217143	210565	238186	151670	156144	174976	721341	140806	293841	160782	156062	238253	103562	171123	178011	109029	293897	183231	310849	417833	102021	175483	200539	190730	249685	173383	179415	42200	205047	331390	126198	136459	215753	85387	279997	69576	165168	196433	201994	95352	136150
399	319210	unidentified compound			468622	105	319210	86 43.0 89 16.0 91 39.0 92 40.0 99 12.0 101 161.0 102 390.0 104 167.0 105 750.0 109 118.0 115 47.0 118 50.0 119 199.0 120 19.0 121 32.0 128 28.0 130 139.0 131 128.0 132 54.0 133 76.0 134 78.0 135 34.0 145 29.0 146 302.0 147 889.0 149 116.0 151 20.0 152 16.0 156 17.0 158 165.0 159 49.0 163 44.0 164 17.0 166 30.0 174 197.0 175 225.0 176 56.0 179 31.0 183 29.0 184 35.0 187 28.0 194 19.0 200 12.0 203…	839	1208	659	28999	35220	32292	33376	43551	36717	39906	42968	37721	32381	39357	30863	48447	38658	44024	42457	57195	52596	1221	1314	1757	1298	1535	1380	1551	1309	1444	732	68298	1902	1635	2242	2559	1923	2363	1637	1209	1451
400	319202	unidentified compound			396679	151	319202	90:62.0 97:236.0 102:170.0 108:81.0 120:28.0 131:109.0 145:13.0 151:891.0 152:81.0 160:51.0 163:147.0 164:84.0 166:13.0 172:84.0 218:69.0 253:27.0 271:16.0 326:25.0 329:25.0 349:15.0 437:21.0	460	1242	356	266	376	624	342	353	384	373	553	393	367	547	427	572	478	570	486	1230	726	509	864	676	423	571	964	618	649	859	985	866	1129	1148	1260	1705	1346	1573	1097	812	2181
401	319195	unidentified compound			693657	205	319195	89:349.0 101:63.0 114:38.0 117:327.0 118:32.0 129:189.0 130:56.0 133:407.0 147:761.0 148:117.0 149:119.0 151:21.0 157:115.0 160:155.0 161:54.0 163:46.0 175:129.0 177:28.0 191:37.0 192:31.0 205:994.0 206:159.0 207:262.0 208:29.0 209:20.0 221:86.0 223:24.0 256:34.0 257:30.0 263:75.0 268:19.0 269:24.0 270:20.0 300:18.0 307:27.0 308:18.0 319:38.0 320:20.0 327:21.0 344:15.0 345:24.0 347:73.0 377:38.0 …	5528	6144	4658	1324	3098	3741	11618	3494	1627	3985	4398	3330	3230	4933	4073	4266	3484	3112	4601	3479	1804	3166	4257	2347	5273	4037	2910	2017	3317	2530	3594	2314	4010	3137	4592	6983	3313	3849	5436	4866	2722
402	318836	unidentified compound			607735	142	318836	92:59.0 93:79.0 108:55.0 109:45.0 110:22.0 111:18.0 131:31.0 142:493.0 148:90.0 179:20.0 183:15.0 211:71.0 235:23.0 236:72.0 258:30.0 261:14.0 288:15.0 304:23.0 307:20.0 308:17.0 319:21.0 328:21.0 340:20.0 343:22.0 361:26.0 381:17.0 390:21.0 434:18.0 476:20.0	558	643	1374	388	362	577	371	614	277	569	638	529	467	517	738	458	509	516	543	588	476	380	407	496	752	398	727	526	506	481	451	875	569	435	711	683	638	500	905	552	814
403	318435	unidentified compound			622736	176	318435	86:56.0 88:295.0 89:145.0 90:20.0 91:70.0 101:87.0 103:53.0 104:49.0 124:24.0 125:25.0 126:36.0 130:107.0 131:59.0 132:67.0 133:113.0 135:82.0 139:20.0 140:35.0 144:26.0 145:24.0 147:211.0 148:105.0 151:34.0 152:15.0 155:20.0 158:26.0 160:42.0 163:95.0 168:29.0 172:15.0 174:79.0 176:574.0 177:118.0 178:132.0 179:33.0 180:25.0 181:17.0 188:32.0 189:40.0 191:63.0 192:33.0 207:39.0 210:39.0 216:19.0…	4117	5134	4573	4770	5776	5656	4413	6464	4985	4514	5460	5924	5226	4712	4290	5484	3869	5981	6174	6978	5740	4793	6233	6529	4691	3509	4567	5389	5083	7378	6528	7125	5998	6072	6362	6601	6199	3427	5618	5959	8057
404	318161	unidentified compound			219188	259	318161	89:936.0 90:93.0 104:805.0 156:15.0 165:18.0 166:19.0 173:32.0 178:22.0 182:14.0 200:38.0 227:17.0 236:20.0 259:411.0 260:65.0 261:20.0 292:14.0 324:15.0 371:14.0 419:17.0 434:19.0	8278	11211	8338	11156	13633	12364	11008	8854	10158	10543	15346	11703	11889	11431	15247	15473	10620	10113	12765	14145	12789	11198	15522	14179	15390	9137	15696	13123	7647	17598	11324	17875	13331	12740	15224	13735	16661	14054	19838	13336	14207
405	317497	unidentified compound			469139	172	317497	87:182.0 88:148.0 91:57.0 98:412.0 100:1827.0 101:1511.0 102:2625.0 103:4891.0 104:590.0 105:260.0 109:131.0 111:29.0 114:160.0 115:423.0 116:1601.0 118:172.0 120:16.0 128:530.0 129:919.0 130:187.0 131:256.0 133:1013.0 134:279.0 142:538.0 143:403.0 144:4289.0 145:612.0 146:281.0 147:344.0 148:404.0 149:524.0 150:44.0 151:42.0 157:1211.0 158:223.0 159:261.0 160:589.0 161:119.0 163:23.0 164:12.0 17…	1006	441	463	607	643	430	839	545	403	668	640	540	516	1272	854	580	652	650	617	854	491	550	787	668	717	1693	878	924	603	1059	728	1092	1024	513	785	1520	918	2134	1277	898	971
406	317494	unidentified compound			840332	218	317494	86:107.0 89:140.0 99:34.0 109:38.0 115:135.0 116:37.0 117:135.0 118:78.0 121:38.0 128:44.0 133:201.0 135:100.0 136:33.0 139:55.0 143:47.0 146:67.0 149:120.0 150:99.0 151:34.0 156:59.0 157:49.0 161:129.0 162:70.0 163:110.0 170:59.0 174:58.0 175:203.0 176:109.0 177:169.0 178:25.0 179:629.0 180:156.0 181:49.0 182:36.0 183:46.0 184:46.0 188:98.0 189:82.0 190:172.0 191:435.0 192:133.0 198:42.0 202:207…	113280	463	2610	535	100261	97585	851	522	101608	2156	493	550	105253	1090	1043	98503	95524	527	114758	784	401	2071	683	564	3709	1090	553	2434	816	890	3081	1010	2742	101233	1063	1124	788	1161	110925	113469	112773
407	317475	unidentified compound			720283	331	317475	85:173.0 86:444.0 100:364.0 101:44.0 102:102.0 105:46.0 106:97.0 112:70.0 113:283.0 115:69.0 116:89.0 118:31.0 129:68.0 130:646.0 131:262.0 133:410.0 141:1885.0 142:71.0 143:60.0 144:108.0 145:17.0 146:38.0 147:2244.0 148:257.0 149:289.0 157:225.0 158:322.0 159:52.0 169:255.0 171:39.0 172:134.0 175:19.0 176:13.0 177:23.0 185:411.0 186:155.0 187:62.0 188:98.0 190:45.0 191:45.0 204:18.0 215:157.0 2…	1420	890	388	467	924	461	1200	726	537	620	1308	616	499	1782	573	722	539	625	829	1453	451	754	735	961	711	1343	793	518	881	1155	437	1128	773	1215	832	1162	618	1185	1369	902	1155
408	316405	unidentified compound			465517	152	316405	85:41.0 86:58.0 88:112.0 90:83.0 96:43.0 99:25.0 100:655.0 101:256.0 102:106.0 103:211.0 104:59.0 105:67.0 106:149.0 107:28.0 115:41.0 116:29.0 117:241.0 118:86.0 119:124.0 120:68.0 127:38.0 129:102.0 130:33.0 131:122.0 132:45.0 133:180.0 134:100.0 135:22.0 136:75.0 138:19.0 139:28.0 144:16.0 147:429.0 148:212.0 149:102.0 151:50.0 152:1116.0 153:147.0 154:41.0 158:10.0 161:26.0 162:16.0 163:31.0 …	31389	850	5608	11688	12167	10171	14289	10975	9409	12047	14281	8297	9460	31781	11089	12396	10144	12529	13314	13558	8971	5651	14525	11281	22235	29204	9146	7569	9366	22998	9389	12727	11554	12679	4125	28582	12876	44880	11606	11649	14000
409	316285	unidentified compound			205203	222	316285	91:34.0 102:460.0 105:113.0 121:63.0 124:244.0 132:123.0 146:50.0 147:1694.0 148:121.0 149:54.0 226:233.0	na	na	na	na	na	na	na	na	na	na	na	na	na	na	na	na	na	na	na	na	na	na	na	na	na	na	na	na	na	na	na	na	na	na	na	na	na	na	na	na	na
410	254028	unidentified compound			431594	102	254028	86:235.0 87:241.0 89:175.0 90:55.0 92:79.0 93:28.0 97:204.0 100:105.0 102:826.0 103:293.0 104:659.0 105:85.0 106:32.0 108:597.0 109:145.0 111:41.0 115:173.0 118:40.0 120:228.0 121:52.0 122:28.0 130:128.0 131:103.0 134:76.0 135:54.0 136:77.0 138:33.0 140:37.0 141:19.0 145:185.0 147:577.0 148:135.0 150:19.0 151:104.0 153:34.0 159:33.0 160:19.0 163:896.0 164:245.0 165:86.0 166:26.0 168:43.0 173:31.0…	1676	1509	1502	1803	1781	2327	1897	2541	1699	2250	2401	1997	1736	2171	1893	3174	2173	2453	2556	2653	2396	1404	2337	2426	2072	1882	799	2232	321	3302	2205	2623	2591	2054	2627	3309	3062	1838	2609	2645	3095
411	253935	unidentified compound			397751	163	253935	94:23.0 96:23.0 97:112.0 107:46.0 108:36.0 110:83.0 115:34.0 123:9.0 132:13.0 143:111.0 153:97.0 154:57.0 160:50.0 169:24.0 172:71.0 173:477.0 177:141.0 207:182.0 208:26.0 231:16.0 246:45.0 263:13.0 274:25.0 275:146.0 276:16.0 296:15.0 338:22.0 343:20.0 349:18.0 378:17.0 441:14.0 468:17.0	5383	6023	1991	1152	1387	1759	1359	1649	1526	1418	1764	1614	1318	1710	1438	2019	1793	1597	1652	1520	2077	1557	1747	1994	1424	1476	2229	2360	1284	2250	2108	2378	2912	2066	2884	3834	2253	3377	2139	2125	2709
412	253516	unidentified compound			478432	89	253516	88:286.0 89:2714.0 97:254.0 101:70.0 117:158.0 118:61.0 125:101.0 129:85.0 143:237.0 144:48.0 155:159.0 159:303.0 163:198.0 203:21.0 213:32.0 216:52.0 236:27.0 237:17.0 245:44.0	2914	3438	5684	7056	9876	11805	5062	11114	10673	13101	13298	10322	10189	8836	8889	14412	10191	10395	11196	12371	9410	5326	12011	11060	5920	2870	8578	10229	3000	11985	6240	9778	9933	11456	9365	10243	13498	8887	9826	8458	15384
413	253508	unidentified compound			280098	120	253508	89:869.0 90:1096.0 91:712.0 92:665.0 93:60.0 95:131.0 97:104.0 98:19.0 100:550.0 102:55.0 104:335.0 105:544.0 106:525.0 108:176.0 111:219.0 112:531.0 113:23.0 116:445.0 120:3609.0 121:444.0 122:131.0 123:31.0 128:133.0 138:30.0 139:895.0 140:57.0 143:663.0 144:29.0 154:254.0 155:49.0 156:135.0 157:136.0 164:572.0 165:483.0 166:35.0 170:769.0 171:94.0 176:312.0 180:163.0 181:43.0 188:886.0 189:315…	4345	4163	7687	7436	6199	7304	10468	7237	8400	6523	5842	7443	10635	3941	3136	6071	7863	6602	8712	9823	6648	6852	5358	6911	7927	3422	3593	10257	6894	3401	8063	4525	8104	5699	5805	7833	6524	3101	4410	7605	7697
414	253507	unidentified compound			220010	124	253507	88:242.0 89:3218.0 90:529.0 91:233.0 94:95.0 95:152.0 96:1186.0 97:933.0 98:54.0 102:499.0 104:3501.0 105:326.0 106:785.0 114:90.0 119:1170.0 120:958.0 122:467.0 123:919.0 124:3792.0 125:2392.0 126:66.0 128:66.0 132:569.0 136:42.0 138:18.0 143:723.0 144:1077.0 145:53.0 148:1063.0 149:346.0 150:126.0 151:85.0 152:134.0 158:20.0 165:72.0 166:138.0 167:25.0 168:1155.0 169:68.0 170:450.0 171:95.0 178…	5413	8962	5591	12537	10474	10962	9186	9623	11233	8981	10767	9490	12429	5008	6522	14140	10854	10725	12527	9535	7119	10342	12061	14170	13987	6438	6731	19327	11594	14262	5844	12157	8440	20582	11727	11707	8318	6757	7438	11194	10758
415	253506	unidentified compound			221343	121	253506	85 234.0 86 310.0 87 415.0 90 378.0 91 462.0 92 1245.0 93 1223.0 94 95.0 95 69.0 96 319.0 97 333.0 99 75.0 100 2500.0 101 489.0 102 1838.0 104 758.0 105 190.0 106 105.0 108 60.0 109 41.0 112 27.0 113 189.0 115 118.0 116 324.0 118 719.0 120 3467.0 121 9033.0 122 642.0 123 122.0 126 166.0 128 32.0 129 1236.0 131 476.0 138 88.0 139 118.0 140 1666.0 141 119.0 143 788.0 144 978.0 145 138.0 147 3956.0 …	13783	19293	14890	14658	12904	17094	14944	10503	13262	13750	14064	21488	22352	10706	16056	18284	18043	12377	15573	22135	15515	18782	23876	19611	29319	11698	14421	34368	18916	21957	20918	17244	13026	29664	16715	24236	19289	10788	20768	22362	18978
416	253142	unidentified compound			399480	143	253142	96:249.0 98:76.0 100:846.0 111:76.0 113:28.0 114:135.0 133:81.0 140:73.0 143:892.0 147:283.0 149:29.0 157:29.0 188:543.0 189:93.0 209:21.0 214:27.0 217:11.0 262:42.0 366:37.0	2113	1879	192	2155	2809	2123	2185	2425	1831	2223	2265	2376	2055	1796	2430	2483	2141	1851	2483	2811	3452	1466	2023	3208	3584	1274	2706	2175	2405	2884	2818	2382	3077	2209	2068	3675	2936	2914	3563	3300	3166
417	253135	unidentified compound			779912	92	253135	86:44.0 87:104.0 89:418.0 90:65.0 91:258.0 92:1209.0 93:114.0 99:54.0 100:41.0 101:186.0 103:2067.0 104:257.0 105:86.0 113:75.0 118:67.0 119:139.0 131:87.0 133:375.0 135:16.0 139:37.0 142:78.0 143:111.0 146:35.0 147:1891.0 148:367.0 149:114.0 150:53.0 156:22.0 157:128.0 159:111.0 163:75.0 168:78.0 173:156.0 182:95.0 189:165.0 191:115.0 192:41.0 194:73.0 197:20.0 200:101.0 201:57.0 204:139.0 205:5…	2432	14000	36821	6529	8400	5973	9656	8030	7669	7584	10885	7659	7876	2062	10670	8237	7697	9054	9956	8381	9740	8831	8755	8169	7961	2100	13203	8815	7504	11302	7991	10089	9636	10022	8590	9497	8279	2280	13161	10222	9894
418	253093	unidentified compound			283223	226	253093	89:38.0 91:452.0 97:68.0 98:321.0 102:120.0 104:118.0 105:236.0 106:59.0 107:26.0 112:30.0 113:507.0 114:330.0 115:73.0 120:622.0 121:57.0 125:61.0 126:109.0 128:74.0 129:109.0 134:435.0 140:19.0 143:247.0 144:54.0 152:34.0 153:139.0 157:249.0 158:55.0 160:42.0 168:88.0 170:178.0 172:56.0 186:485.0 187:50.0 188:65.0 192:26.0 200:33.0 201:81.0 226:618.0 227:127.0 241:82.0 270:393.0 271:58.0 272:36…	1003	1231	1044	1809	1608	1664	2681	1383	1497	1295	2065	1820	1682	1134	1036	1428	2145	1616	2342	2408	1074	1662	2217	2250	2150	709	802	1513	1827	2478	1750	1192	1392	1861	1433	1987	2315	899	326	1687	1711
419	253076	unidentified compound			321813	178	253076	89:398.0 102:1031.0 103:832.0 104:251.0 117:961.0 119:87.0 122:94.0 123:91.0 124:15.0 132:258.0 133:186.0 140:90.0 148:74.0 149:799.0 150:190.0 151:69.0 159:61.0 170:48.0 178:773.0 179:83.0 182:19.0 197:22.0 249:28.0 289:22.0 338:18.0 349:18.0 454:20.0	1407	1074	1515	1317	2250	1596	1494	2157	1816	1836	2357	2427	1513	2207	1993	2424	2132	2502	2241	4167	3048	1389	3482	2991	1933	2080	4332	4107	1611	3041	3234	3670	3953	3386	3996	5058	4250	3824	3956	3939	3958
420	253069	unidentified compound			748329	113	253069	85:65.0 86:150.0 89:386.0 90:76.0 92:36.0 99:71.0 100:105.0 104:157.0 105:97.0 106:25.0 113:951.0 114:114.0 115:141.0 118:45.0 119:115.0 120:33.0 129:619.0 131:193.0 133:740.0 134:84.0 135:77.0 145:13.0 147:163.0 156:18.0 159:80.0 161:537.0 163:163.0 175:25.0 177:21.0 179:20.0 184:24.0 187:133.0 188:49.0 189:48.0 190:51.0 191:95.0 193:23.0 196:22.0 198:20.0 203:378.0 204:76.0 205:42.0 219:162.0 2…	3119	2955	821	2067	3211	437	595	508	2271	693	518	439	3092	565	578	640	383	2571	491	2998	552	690	2922	608	3182	3227	3141	2606	3359	3608	604	3097	3311	803	757	713	560	535	969	545	3042
421	253051	unidentified compound			361511	105	253051	85:149.0 89:179.0 90:123.0 91:323.0 92:30.0 93:24.0 98:57.0 101:269.0 102:37.0 103:175.0 104:228.0 105:2966.0 106:230.0 107:114.0 113:49.0 119:383.0 120:303.0 121:163.0 131:102.0 133:258.0 134:263.0 135:175.0 137:61.0 138:23.0 143:127.0 145:155.0 147:2117.0 148:385.0 149:449.0 150:184.0 151:446.0 152:61.0 164:21.0 170:307.0 197:26.0 199:18.0 200:24.0 214:1192.0 215:621.0 216:75.0 217:19.0 219:62.…	8100	9734	8269	9230	9823	10210	8160	9540	9879	9119	11491	10338	11237	6882	6800	12533	10915	8791	13195	12412	9684	11734	12473	12437	10684	5712	5650	12408	12764	11006	11964	10734	10729	12894	9804	11801	10661	5797	7748	10554	10360
422	251709	unidentified compound			712487	316	251709	88:72.0 96:29.0 100:24.0 146:64.0 154:31.0 167:40.0 177:28.0 187:26.0 202:20.0 246:15.0 316:455.0 317:161.0	2662	1993	1947	1435	2530	1868	2337	1813	1694	2455	1955	1562	2436	2216	1797	2711	1567	2578	2083	3011	1771	2612	2182	2059	2062	1950	2157	2597	1933	2664	2556	2555	2371	1919	2464	3559	2781	2095	2566	2362	2282
423	251097	unidentified compound			505941	99	251097	87 177.0 88 41.0 90 26.0 95 70.0 97 43.0 99 2402.0 100 264.0 106 34.0 114 47.0 115 94.0 124 16.0 130 95.0 132 179.0 136 24.0 141 44.0 146 35.0 158 107.0 160 15.0 167 22.0 173 308.0 174 55.0 175 101.0 177 35.0 181 50.0 184 43.0 188 51.0 189 208.0 190 81.0 191 34.0 192 18.0 202 37.0 203 57.0 210 18.0 215 16.0 221 89.0 240 14.0 245 55.0 247 63.0 261 18.0 263 130.0 264 34.0 271 20.0 283 26.0 284 24.0…	3992	4511	641	3678	5983	6146	7416	8622	6433	7865	10768	7874	6540	8715	8847	8081	7543	10835	10886	14248	7746	6903	11168	11998	7468	8437	13084	10329	8514	13595	10621	11784	11682	10374	14499	18866	13693	16876	16456	13089	20078
424	250755	unidentified compound			575274	251	250755	86:121.0 90:27.0 92:30.0 94:71.0 98:59.0 99:166.0 100:804.0 101:324.0 104:75.0 108:67.0 109:6119.0 110:292.0 111:141.0 112:143.0 113:133.0 114:37.0 115:114.0 116:233.0 117:1078.0 120:111.0 131:6727.0 132:647.0 136:34.0 137:51.0 138:30.0 139:142.0 140:133.0 142:93.0 147:2025.0 150:74.0 151:105.0 153:192.0 154:94.0 158:78.0 159:1011.0 160:264.0 168:12.0 172:59.0 177:26.0 178:221.0 179:15.0 181:59.0…	1058	1636	1265	665	671	461	437	1200	949	534	1456	1173	499	1121	1176	593	611	845	630	1251	400	1130	971	697	882	888	735	636	1093	637	1154	768	801	651	1185	727	1123	841	1174	1153	802
425	250544	unidentified compound			434121	144	250544	85:2274.0 86:764.0 87:124.0 89:286.0 91:378.0 92:117.0 93:102.0 94:71.0 95:123.0 96:262.0 97:224.0 98:1373.0 99:404.0 101:393.0 102:3737.0 103:919.0 105:133.0 107:64.0 111:117.0 112:156.0 113:254.0 114:5180.0 115:419.0 116:385.0 117:229.0 120:118.0 121:56.0 125:91.0 127:486.0 128:803.0 129:1801.0 130:967.0 131:599.0 132:406.0 137:33.0 141:69.0 142:156.0 143:198.0 144:17143.0 145:2083.0 146:840.0 …	820	1046	777	1008	1068	900	1549	1051	928	1311	1331	1001	948	1363	1691	926	1320	984	1456	1054	1481	1000	1382	1978	1091	1629	1813	1194	1242	2288	1611	1350	1564	1429	2236	3056	2109	2614	2280	1500	1702
426	249248	unidentified compound			784812	278	249248	105:103.0 143:45.0 153:74.0 159:19.0 161:51.0 170:40.0 178:36.0 179:113.0 193:180.0 195:51.0 202:162.0 203:133.0 221:83.0 222:64.0 228:42.0 252:40.0 257:50.0 278:385.0 279:35.0 280:54.0 285:25.0 290:39.0 292:45.0 294:44.0 296:19.0 301:96.0 302:56.0 369:20.0 391:224.0 392:99.0 393:18.0 440:21.0 455:19.0 476:17.0	971	826	1579	346	415	315	642	377	484	471	544	406	540	1251	562	450	448	512	581	2803	560	1595	1305	1652	1301	1630	1743	446	1889	2521	1859	2257	1550	603	621	843	497	1847	567	563	2550
427	240104	unidentified compound			332551	160	240104	103:793.0 116:738.0 160:1162.0 161:158.0 194:34.0 195:29.0 207:64.0 225:42.0 285:37.0	3695	4597	2673	1534	5460	7132	5694	9840	6564	7584	14255	7150	8194	13566	7691	10529	9211	11764	13193	18647	8024	5175	14772	16598	9954	5932	14283	12035	7269	18314	9709	14763	13106	12231	18432	24771	12034	17912	20918	15261	20155
428	239322	unidentified compound			434722	144	239322	89 31.0 98 68.0 102 225.0 110 38.0 115 26.0 116 139.0 131 146.0 132 112.0 134 236.0 135 28.0 142 36.0 144 705.0 160 37.0 172 14.0 175 100.0 176 64.0 187 31.0 202 39.0 216 146.0 232 75.0 250 91.0	820	1046	777	1008	1068	900	1549	1051	928	1311	1331	1001	948	1363	1691	926	1320	1364	1456	2347	1481	1000	1382	1978	1091	1629	1813	1194	1242	2288	1611	1350	1564	1429	2236	3056	2802	2614	2280	1500	1702
429	237287	unidentified compound			324581	233	237287	109:48.0 117:1556.0 128:15.0 163:51.0 165:27.0 167:21.0 201:13.0 210:23.0 230:20.0 231:27.0 233:624.0 234:128.0 235:54.0 238:23.0 252:15.0 253:26.0 256:32.0 257:25.0 282:32.0 340:29.0 344:15.0 364:25.0 367:19.0 377:18.0 386:20.0 394:26.0 407:9.0 410:17.0 420:16.0 425:17.0 437:29.0 443:14.0 457:17.0 465:21.0 469:14.0 471:16.0 485:16.0 496:17.0	1973	2644	1745	1890	2139	2237	2362	2453	2202	1559	1904	1922	2174	1888	2551	1906	2016	2495	2707	2844	2134	2173	1837	1918	2488	2412	2592	2617	2357	2086	2610	2376	1951	1792	2873	3127	2902	2088	2285	2500	3446
430	233434	unidentified compound			716903	387	233434	87:86.0 88:53.0 95:43.0 98:81.0 105:117.0 152:40.0 155:31.0 156:60.0 165:28.0 167:96.0 169:52.0 180:23.0 183:99.0 184:36.0 185:35.0 188:39.0 190:17.0 197:37.0 205:35.0 208:25.0 211:161.0 212:65.0 214:24.0 224:30.0 225:60.0 241:67.0 268:28.0 271:58.0 273:28.0 283:24.0 301:24.0 314:39.0 318:22.0 330:17.0 333:36.0 337:15.0 367:18.0 387:460.0 388:205.0 389:63.0 390:22.0 402:37.0 404:26.0 419:27.0 440…	1206	1032	130	569	1042	1199	1814	1523	1258	1364	1661	1066	1126	1251	1204	1187	1110	1439	1599	2142	1118	1799	1598	1670	1852	2886	1799	1622	1986	2088	2027	2024	1738	1563	2183	3803	2146	2243	2261	2359	2403
431	233344	unidentified compound			797092	162	233344	85 48.0 87 113.0 89 288.0 90 46.0 91 58.0 92 29.0 93 44.0 95 27.0 98 21.0 102 69.0 103 1237.0 104 164.0 105 79.0 107 167.0 108 361.0 119 87.0 120 26.0 129 218.0 130 59.0 132 114.0 133 227.0 134 107.0 141 37.0 142 27.0 143 82.0 147 1190.0 148 114.0 149 160.0 157 18.0 158 18.0 162 375.0 163 82.0 169 16.0 170 38.0 172 29.0 173 133.0 175 48.0 180 36.0 184 49.0 186 14.0 189 69.0 190 32.0 191 62.0 192 …	582	4479	7177	1573	1752	1614	3087	2049	1804	1857	2967	2056	1785	633	3900	1971	1923	2629	2796	2555	2345	1932	2664	2270	2699	653	4806	2656	1668	2324	2487	2838	2818	2519	2345	3863	2056	676	4275	2927	2544
432	233307	unidentified compound			872513	161	233307	86:37.0 88:96.0 89:451.0 90:55.0 97:51.0 99:100.0 100:335.0 101:150.0 102:158.0 103:2031.0 104:223.0 105:97.0 111:37.0 112:37.0 115:76.0 117:381.0 118:78.0 119:76.0 126:54.0 128:54.0 129:263.0 130:74.0 131:126.0 133:471.0 134:63.0 135:62.0 137:55.0 138:15.0 141:43.0 142:151.0 143:72.0 144:57.0 146:48.0 147:1101.0 148:245.0 149:145.0 150:36.0 155:21.0 157:54.0 158:82.0 159:19.0 160:83.0 161:637.0 …	553	3220	10304	1925	1368	1661	1381	1877	1784	1732	3022	2220	874	568	2392	2148	2289	1744	1372	734	3394	3217	2439	2529	1333	522	2244	2217	2705	1792	2735	1282	3067	3837	2748	1936	2519	140	1629	959	3405
433	233204	unidentified compound			926041	140	233204	85:99.0 87:60.0 89:245.0 98:172.0 101:73.0 103:1056.0 104:107.0 105:74.0 110:35.0 112:140.0 113:86.0 114:55.0 117:328.0 118:60.0 119:41.0 125:29.0 126:77.0 129:166.0 130:23.0 131:101.0 135:59.0 137:29.0 138:33.0 139:321.0 140:617.0 141:29.0 142:99.0 143:46.0 144:21.0 145:76.0 147:879.0 148:230.0 149:112.0 154:80.0 156:57.0 158:43.0 159:91.0 161:9.0 163:56.0 167:45.0 169:38.0 170:51.0 172:69.0 173…	750	4564	8423	1759	2004	2030	2164	1861	1888	2026	2834	3174	1653	856	3230	1771	2050	2844	2517	1934	2734	2414	2277	2361	1945	727	3906	2123	3115	2416	2294	2790	2962	2957	2154	3168	2130	1000	3926	3047	2950
434	233180	unidentified compound			513212	149	233180	89:72.0 102:31.0 132:36.0 149:692.0 150:64.0 193:415.0 194:84.0 195:35.0 223:78.0 275:20.0 280:18.0 295:33.0 362:21.0 382:20.0 486:16.0	61507	4605	16425	30289	33519	32743	37056	35419	21612	40999	46662	31768	27216	68628	27928	48547	26562	34406	39189	47889	33262	14958	44927	40955	47647	65348	25651	21090	27769	57392	30354	44172	35107	43255	42449	67165	40825	73970	31557	37517	49382
435	233139	unidentified compound			588585	200	233139	99:17.0 100:24.0 102:138.0 144:116.0 146:24.0 153:65.0 174:133.0 198:346.0 200:640.0 201:28.0 232:12.0 247:63.0 248:218.0 249:13.0 252:70.0 272:41.0 273:24.0 274:60.0	3344	3733	1452	2130	4047	2584	3544	4455	3981	4919	4667	4086	2942	4223	3844	5045	4162	6221	4784	6741	7383	7955	7625	8024	5851	7795	5858	7538	9469	8027	10690	11670	10226	9612	11435	18212	9616	10643	12034	11814	11434
436	233138	unidentified compound			588897	199	233138	85:229.0 102:88.0 120:96.0 128:201.0 129:142.0 130:139.0 144:225.0 148:77.0 152:123.0 159:23.0 172:49.0 184:291.0 198:331.0 199:680.0 246:40.0 247:217.0 251:62.0 473:18.0	1866	501	1070	1102	1331	1185	1611	960	1707	512	2312	877	1504	2215	1461	1840	2075	2380	1331	2201	366	1628	2265	2715	2353	2745	2920	2659	2707	3848	2801	4251	554	2442	2048	6423	3414	1479	3480	4274	4828
437	233118	unidentified compound			786138	92	233118	90:51.0 91:373.0 92:2303.0 93:164.0 103:2703.0 114:40.0 119:180.0 133:655.0 134:79.0 147:1511.0 148:350.0 149:81.0 150:30.0 152:124.0 156:40.0 170:53.0 173:149.0 182:302.0 188:56.0 191:136.0 194:91.0 196:7.0 206:116.0 210:282.0 211:68.0 215:28.0 216:22.0 217:764.0 218:186.0 221:78.0 226:37.0 231:23.0 233:27.0 244:28.0 247:9.0 261:18.0 268:62.0 269:44.0 279:50.0 280:15.0 284:34.0 292:41.0 293:72.0…	2549	36644	113639	17373	19902	14953	27247	18709	18010	17002	29667	19591	19101	2814	30442	20439	19290	21437	26274	18496	25663	22613	24136	22253	20064	2461	35923	23235	20311	23558	21928	29750	27420	30543	24190	27007	22539	2196	34610	27635	27645
438	233103	unidentified compound			471575	105	233103	85:287.0 86:47.0 87:160.0 89:94.0 90:26.0 91:40.0 92:34.0 93:48.0 94:39.0 99:81.0 101:467.0 102:1091.0 103:1701.0 104:1623.0 105:8428.0 106:503.0 107:38.0 113:81.0 115:33.0 118:58.0 119:103.0 121:19.0 122:28.0 126:22.0 129:69.0 131:398.0 132:308.0 133:170.0 135:59.0 141:40.0 142:39.0 146:98.0 148:93.0 149:181.0 150:71.0 151:185.0 152:46.0 153:36.0 154:56.0 156:10.0 157:28.0 159:60.0 162:53.0 163:…	22569	19643	17089	23677	28860	26413	27437	35860	30954	33460	36767	32403	27874	33167	25573	39409	33046	35767	35304	57195	42432	33089	39827	42431	29138	33643	36865	41617	36683	45648	43423	54289	49411	45574	50812	66215	44072	45979	42702	43307	54758
439	231695	unidentified compound			784239	278	231695	100:41.0 108:27.0 112:12.0 114:23.0 122:39.0 123:65.0 133:59.0 135:23.0 146:51.0 157:16.0 162:29.0 176:24.0 199:78.0 200:25.0 201:57.0 202:314.0 203:81.0 216:27.0 245:61.0 246:21.0 268:37.0 277:30.0 278:337.0 279:54.0 280:62.0 287:35.0 288:10.0 290:73.0 291:41.0 296:17.0 300:9.0 301:62.0 302:25.0 303:26.0 310:21.0 311:19.0 316:19.0 317:17.0 321:24.0 322:26.0 329:33.0 330:21.0 345:15.0 347:20.0 34…	971	1143	1579	346	849	567	1332	862	484	882	1293	1556	995	1251	1136	1211	923	1635	1644	2803	805	1595	1305	1652	1301	1630	1743	1007	1889	2521	1859	2257	1550	1620	1602	2888	2208	1847	2104	2006	2550
440	231666	unidentified compound			691547	211	231666	85:29.0 91:32.0 98:45.0 100:65.0 104:24.0 105:42.0 119:46.0 130:17.0 155:79.0 156:31.0 211:600.0 212:59.0 239:27.0	1046	998	578	795	1344	1367	1970	1590	1521	1685	2439	2451	2398	2703	2070	2628	2158	3879	3352	4583	3132	3313	3504	3618	3159	4403	3916	4287	4867	4371	4534	4476	4717	4404	5689	7836	5838	6064	5291	5766	7639
441	231191	unidentified compound			552921	156	231191	85 64.0 86 17.0 87 23.0 88 63.0 89 398.0 92 38.0 100 95.0 101 61.0 103 912.0 104 76.0 107 54.0 108 22.0 109 17.0 110 44.0 111 35.0 112 20.0 113 54.0 114 139.0 115 165.0 117 565.0 118 77.0 119 27.0 124 23.0 125 36.0 128 11.0 129 66.0 130 57.0 131 75.0 133 349.0 134 52.0 135 24.0 140 36.0 141 48.0 145 30.0 146 33.0 147 1424.0 148 51.0 149 155.0 153 11.0 154 35.0 156 685.0 157 65.0 158 36.0 160 65.0…	5000	3918	1076	1724	2365	2580	3748	3718	2320	2682	3192	3406	3046	3503	3734	2666	2670	2660	3214	3530	2916	4613	4044	4387	3504	8983	4736	4418	5220	3757	4750	4733	4580	3450	4604	7008	4455	4815	5343	6368	4564
442	230854	unidentified compound			736420	217	230854	85:63.0 88:45.0 89:374.0 90:46.0 101:55.0 102:52.0 103:961.0 104:174.0 105:406.0 113:19.0 117:467.0 118:62.0 119:36.0 120:41.0 121:38.0 128:29.0 129:427.0 130:156.0 131:49.0 133:328.0 140:18.0 142:91.0 143:83.0 144:49.0 145:68.0 147:923.0 148:247.0 149:74.0 150:62.0 153:20.0 155:29.0 157:98.0 160:575.0 161:138.0 162:25.0 163:39.0 164:29.0 168:30.0 170:37.0 172:37.0 175:44.0 176:31.0 183:16.0 189:…	12695	4550	218	1400	2621	1644	7568	2586	1854	2761	2759	3164	2978	10103	2468	2753	2233	3318	3281	3211	2323	3009	3586	1817	5058	11318	2375	1909	2434	3243	902	2838	2187	2234	2636	3874	2111	10836	3760	3652	1819
443	230607	unidentified compound			597413	173	230607	85:118.0 87:114.0 89:354.0 99:29.0 100:172.0 101:89.0 102:59.0 103:404.0 104:52.0 111:36.0 117:271.0 118:36.0 121:18.0 126:40.0 129:195.0 132:79.0 134:58.0 135:66.0 143:83.0 146:33.0 147:716.0 159:33.0 161:27.0 163:40.0 173:377.0 174:39.0 175:40.0 180:22.0 183:15.0 189:172.0 191:56.0 192:54.0 202:60.0 203:20.0 204:187.0 205:360.0 206:63.0 207:52.0 211:18.0 217:332.0 234:16.0 264:21.0 271:23.0 274…	8557	3876	8432	1861	2104	1833	6660	1788	2186	1873	2819	3896	4838	2138	2150	2177	1980	2185	2301	6545	4164	2462	3447	2770	5793	1389	3105	3197	2245	2467	5788	2002	2650	2252	2561	3421	2881	1442	2425	3729	1326
444	229949	unidentified compound			553499	144	229949	86:331.0 87:225.0 88:356.0 89:85.0 98:196.0 101:740.0 102:457.0 116:1375.0 117:869.0 119:147.0 127:236.0 128:46.0 130:910.0 131:406.0 132:887.0 133:222.0 142:107.0 144:4219.0 145:455.0 146:279.0 147:1551.0 148:495.0 149:387.0 155:40.0 159:544.0 160:910.0 161:155.0 162:79.0 169:50.0 170:27.0 172:51.0 176:56.0 177:165.0 178:27.0 179:36.0 184:51.0 187:136.0 188:158.0 189:179.0 190:88.0 191:800.0 192…	29321	38213	21802	4890	3513	16511	23475	17306	15408	15321	18215	17344	17054	16431	16602	14984	14945	17362	18831	3183	14879	7152	16646	7361	20665	25163	18589	3537	22654	18433	2699	21812	17237	5569	16866	22938	16180	14289	19264	11142	9287
445	229935	unidentified compound			441147	157	229935	86:232.0 89:333.0 91:100.0 95:57.0 96:585.0 98:99.0 99:114.0 100:57.0 101:1974.0 102:202.0 109:40.0 111:191.0 115:685.0 125:67.0 128:282.0 129:218.0 130:170.0 141:100.0 143:132.0 144:41.0 146:134.0 157:4604.0 158:438.0 159:46.0 167:23.0 171:78.0 172:75.0 186:283.0 187:60.0 188:54.0 214:615.0 215:95.0 217:81.0 218:22.0 227:30.0 259:190.0 260:46.0 285:11.0 288:23.0 318:14.0 339:19.0 349:12.0 384:13…	465	500	368	277	510	517	694	935	552	649	1131	717	617	831	804	945	634	868	667	1551	674	690	731	950	847	1145	885	1117	1153	1064	1029	852	839	1141	1371	2255	1526	2084	1720	1132	1581
446	224866	unidentified compound			271039	262	224866	87:342.0 94:116.0 95:254.0 108:45.0 158:41.0 171:66.0 172:99.0 173:56.0 174:545.0 175:174.0 178:58.0 188:58.0 198:37.0 203:30.0 211:21.0 212:23.0 213:26.0 215:21.0 218:81.0 248:287.0 249:45.0 250:23.0 262:446.0 263:115.0 264:79.0 265:21.0 283:32.0 307:27.0 368:20.0 386:18.0 388:20.0 397:17.0 407:23.0 437:14.0 462:26.0 482:23.0 487:40.0	821	892	517	744	807	1114	859	948	747	957	1264	989	926	1097	1208	1110	1015	1152	982	1235	660	1286	1356	1196	1244	1033	1416	1155	1107	1463	1361	1364	1287	1156	1501	1069	1336	1575	1586	1748	1503
447	220689	unidentified compound			406810	184	220689	89:149.0 90:105.0 93:42.0 107:46.0 120:28.0 121:22.0 126:45.0 134:490.0 136:33.0 140:227.0 143:28.0 146:87.0 161:27.0 177:41.0 178:28.0 184:1050.0 185:136.0 186:33.0 188:51.0 193:64.0 198:27.0 204:71.0 208:24.0 214:641.0 215:76.0 216:18.0 222:111.0 234:7.0 267:87.0 268:17.0 281:72.0 282:38.0 283:22.0 355:29.0 357:32.0 430:16.0 432:16.0 451:22.0	2074	2319	744	655	852	1194	1593	1456	1885	1455	2250	1188	736	2726	1218	2022	1546	2462	3018	4569	2158	1990	2512	1612	1205	3261	2673	1930	2785	2877	2804	3425	2616	2156	2881	3203	2678	3590	2436	3075	4105
448	220224	unidentified compound			554829	320	220224	85:66.0 87:92.0 88:76.0 100:413.0 103:253.0 105:85.0 106:15.0 114:60.0 118:30.0 131:232.0 133:239.0 142:68.0 143:208.0 147:1850.0 148:361.0 149:127.0 158:131.0 163:61.0 172:53.0 174:96.0 180:23.0 189:22.0 190:72.0 191:137.0 217:201.0 221:98.0 230:238.0 231:58.0 232:27.0 233:110.0 234:12.0 260:13.0 278:155.0 279:38.0 290:27.0 304:39.0 305:36.0 319:15.0 320:318.0 321:86.0 322:15.0 334:41.0 343:25.0…	7260	700	1375	1182	1433	1090	2320	1457	733	1790	1396	719	1932	6370	1808	1245	1408	1254	1328	1328	1351	1503	1112	1204	2080	7311	1453	1683	2066	2037	1457	1854	1358	1419	1384	3604	1616	6983	1849	1874	1775
449	219819	unidentified compound			862036	290	219819	85:42.0 87:49.0 97:54.0 98:30.0 103:520.0 104:24.0 105:35.0 107:32.0 116:145.0 123:18.0 144:143.0 168:36.0 232:127.0 252:194.0 253:18.0 262:71.0 263:23.0 290:340.0 291:73.0 292:47.0 304:15.0 305:25.0 353:18.0 411:39.0	4097	3469	128	2841	4347	2846	6777	5799	4978	4898	5408	5411	5697	6729	5110	3446	4795	5813	5746	8163	4321	5255	6003	5637	7742	6533	5774	5954	6385	4905	6095	4311	5032	4608	5064	9265	5369	5033	3949	5727	4781
450	219490	unidentified compound			383216	220	219490	89:571.0 90:144.0 91:84.0 94:45.0 97:119.0 98:90.0 105:43.0 106:43.0 129:176.0 131:89.0 132:45.0 138:25.0 144:47.0 147:726.0 148:74.0 156:521.0 158:38.0 160:47.0 174:513.0 220:404.0 221:48.0 248:17.0 361:15.0 364:23.0 386:28.0 465:21.0 494:20.0	625	3375	1136	1730	3199	2294	3732	3257	2694	2933	3538	2737	2133	3293	2489	3599	2535	3069	2823	4800	3842	2979	2789	2399	2083	2465	3260	3374	3620	3319	4638	5041	3930	3402	4044	4497	3478	3625	4483	3856	4841
451	213228	unidentified compound			368671	273	213228	88:189.0 89:245.0 92:55.0 97:56.0 100:1967.0 107:51.0 110:359.0 111:336.0 112:91.0 117:408.0 118:255.0 119:78.0 120:84.0 121:28.0 125:24.0 130:371.0 131:202.0 157:65.0 158:117.0 161:90.0 163:22.0 165:71.0 166:25.0 184:43.0 185:399.0 186:49.0 188:186.0 192:133.0 193:17.0 194:30.0 201:29.0 203:105.0 205:78.0 207:120.0 212:19.0 217:41.0 231:18.0 232:27.0 233:21.0 234:19.0 235:561.0 236:58.0 243:19.0…	723	725	213	540	782	739	511	1018	633	567	1183	954	813	830	625	819	597	976	1087	1158	1247	1306	900	1305	575	1269	1134	1331	1511	1619	1215	1425	1539	1494	2058	1948	1648	1429	2132	1426	1931
452	210993	unidentified compound			877833	217	210993	85:1874.0 86:6086.0 87:3720.0 89:1248.0 92:221.0 93:195.0 97:335.0 98:786.0 100:982.0 101:1917.0 102:586.0 103:11469.0 105:642.0 111:583.0 113:1097.0 114:601.0 115:1017.0 116:1214.0 117:6498.0 118:1024.0 120:197.0 124:170.0 125:122.0 127:248.0 128:696.0 129:763.0 130:447.0 131:236.0 132:968.0 133:4900.0 135:521.0 141:66.0 142:2643.0 143:1684.0 145:366.0 146:1190.0 147:27126.0 148:4249.0 149:2761.…	1963	1225	3045	688	1378	342	1789	1286	1207	1293	605	1281	834	2301	2385	723	1162	1558	1501	1192	1428	1401	1914	777	2111	2417	1628	1215	1749	1530	1643	1083	1960	1321	1866	3776	997	2745	1971	1958	1537
453	210714	unidentified compound			287683	171	210714	99:1700.0 100:1217.0 102:133.0 103:105.0 107:108.0 108:32.0 113:250.0 114:137.0 118:113.0 122:140.0 123:28.0 124:39.0 131:645.0 132:722.0 134:79.0 139:104.0 141:93.0 143:57.0 146:578.0 147:6666.0 148:1028.0 149:563.0 152:90.0 155:138.0 157:168.0 158:38.0 171:3665.0 172:697.0 173:1229.0 174:66.0 175:58.0 183:15.0 185:53.0 187:39.0 188:106.0 189:442.0 190:109.0 196:39.0 197:31.0 204:474.0 205:87.0 …	9524	10213	1472	545	1062	1398	1314	1054	1214	1435	1860	713	463	1247	1176	970	1131	3171	5599	1849	343	1478	1982	2277	1575	8165	436	655	8904	3365	636	994	687	486	1432	1558	797	1451	1915	749	1996
454	210694	unidentified compound			658195	160	210694	86 21484.0 88 10164.0 89 143067.0 90 11266.0 91 6923.0 96 1177.0 97 5851.0 98 4019.0 99 10049.0 100 42615.0 101 40736.0 102 31076.0 105 89108.0 106 9887.0 107 3746.0 108 577.0 110 2886.0 112 6307.0 114 32079.0 115 19443.0 117 326196.0 118 35429.0 119 27623.0 120 2768.0 122 690.0 123 435.0 124 1228.0 126 5211.0 127 11731.0 128 16490.0 129 345972.0 130 76225.0 131 81479.0 132 15134.0 133 196482.0 1…	1781901	2345801	1636026	1168405	1495411	1362864	4424171	1563591	1429035	1833128	2233520	2108655	1873832	1749146	1874250	1835395	1437867	1703357	1997170	2166092	1197818	1571221	2311281	1690261	3126755	1580416	2037213	1849861	1522620	2319240	1476925	1897550	1808005	1576718	1792237	3259602	1813977	1446706	2232260	2270446	1496954
455	210682	unidentified compound			415455	305	210682	85:251.0 86:138.0 87:1019.0 88:80.0 89:347.0 91:130.0 96:69.0 97:50.0 98:47.0 99:727.0 100:35.0 101:288.0 102:129.0 103:1141.0 104:120.0 105:362.0 106:76.0 108:55.0 110:40.0 112:35.0 113:272.0 115:668.0 116:203.0 117:626.0 118:105.0 119:539.0 120:64.0 121:76.0 124:20.0 126:136.0 127:217.0 128:39.0 129:538.0 130:292.0 132:181.0 133:4887.0 134:789.0 135:531.0 136:33.0 137:30.0 141:33.0 142:40.0 143…	418	401	247	248	378	387	576	293	183	190	368	381	300	440	600	361	310	267	452	322	419	454	426	362	531	299	409	497	306	414	661	330	354	305	418	656	593	397	771	326	453
456	210658	unidentified compound			423702	85	210658	85:1617.0 86:162.0 87:212.0 91:91.0 92:65.0 98:222.0 99:267.0 106:150.0 112:7.0 113:155.0 115:117.0 117:170.0 120:21.0 127:292.0 131:410.0 134:64.0 141:5.0 146:44.0 148:639.0	33685	26082	22827	11797	13024	15044	15142	16488	14040	20866	15061	15651	15215	38695	28956	16154	12669	15227	20532	19310	15907	15973	17502	16726	11432	35302	23674	15745	15844	15680	17313	25374	15320	28323	21757	28182	27614	34571	28193	21090	33791
457	210457	unidentified compound			584161	205	210457	205 138.0	7432	5868	1735	3912	3445	4304	15097	4737	5040	5671	6003	6344	5515	5330	5005	5516	5130	5423	6174	6197	4433	5571	5957	5440	10281	5410	5037	6515	5248	7111	5107	4415	5748	4883	6273	10974	6498	4592	6814	6619	5669
458	210343	unidentified compound			290362	189	210343	85:516.0 86:111.0 89:2938.0 90:214.0 91:336.0 94:40.0 95:67.0 99:444.0 100:158.0 102:88.0 105:101.0 106:189.0 107:122.0 108:157.0 110:313.0 113:416.0 114:329.0 128:73.0 130:120.0 146:73.0 172:31.0 189:575.0 193:34.0 200:437.0 203:25.0	5306	5716	1052	2603	4331	4626	11349	7503	3770	4953	5804	6478	5830	7263	2633	6019	5444	6036	3041	9181	4296	5060	7370	2383	5876	3710	5335	4523	4876	10057	6083	4581	8431	3023	7704	7295	8447	5612	5363	7698	7131
459	210313	unidentified compound			565988	217	210313	88:83.0 89:337.0 95:106.0 99:68.0 100:88.0 103:2325.0 104:193.0 116:75.0 117:950.0 129:803.0 130:183.0 133:510.0 134:58.0 139:25.0 141:26.0 142:7.0 146:56.0 157:80.0 170:16.0 183:59.0 189:98.0 191:97.0 204:81.0 205:456.0 217:1739.0 218:249.0 219:24.0 221:37.0 243:100.0 307:24.0 319:23.0	3860	3379	4882	1223	1304	2101	2021	1481	1731	1095	2225	5313	1686	3417	2748	1687	956	2513	2778	2701	1723	1920	1960	1917	4573	2776	3185	1712	1190	2501	1502	3666	9631	1242	4332	3039	1265	1864	3300	2703	1502
460	210294	unidentified compound			190419	103	210294	85 193.0 86 86.0 87 555.0 96 104.0 99 163.0 100 145.0 101 157.0 102 82.0 103 10883.0 104 814.0 105 553.0 111 46.0 115 270.0 116 42.0 117 98.0 127 228.0 133 330.0 144 15.0 161 325.0 170 37.0 220 24.0 270 20.0 282 36.0 311 24.0 341 23.0 350 24.0 356 25.0 360 23.0 383 21.0 448 16.0	na	na	na	na	na	na	na	na	na	na	na	na	na	na	na	na	na	na	na	na	na	na	na	na	na	na	na	na	na	na	na	na	na	na	na	na	na	na	na	na	na
461	210283	unidentified compound			610166	204	210283	85 2300.0 86 787.0 87 4839.0 88 2383.0 89 5571.0 90 1878.0 91 412.0 92 704.0 94 1240.0 95 1180.0 96 392.0 97 1077.0 99 1754.0 100 668.0 101 6923.0 102 841.0 103 20914.0 104 2149.0 105 767.0 106 256.0 107 846.0 108 73.0 109 2177.0 110 1331.0 111 2970.0 112 268.0 113 1845.0 115 3446.0 116 1616.0 117 10702.0 118 824.0 119 1079.0 121 381.0 123 298.0 124 289.0 126 215.0 127 1396.0 129 12632.0 131 8017…	66317	8474	20412	16520	18154	11854	110446	17117	16363	18734	16325	12421	16064	60952	28013	8559	13469	18656	17602	29085	10773	10481	22759	16775	31947	66131	23529	11830	17530	23507	19533	21835	22060	14731	21960	72615	16137	71303	28699	35196	6761
462	210272	unidentified compound			700671	220	210272	86:9319.0 89:171596.0 90:14667.0 91:17916.0 94:766.0 95:1161.0 97:8463.0 98:3475.0 99:12666.0 100:145403.0 101:75879.0 102:57843.0 104:17992.0 105:27190.0 106:4447.0 107:1338.0 108:758.0 109:1485.0 110:1347.0 111:10858.0 112:3583.0 113:19610.0 115:29860.0 116:43047.0 117:86611.0 118:13704.0 119:22647.0 120:3167.0 121:2178.0 122:659.0 123:598.0 124:1151.0 125:3035.0 126:5764.0 127:13452.0 128:1317…	8764	11689	12675	4682	7031	10820	33331	6445	5494	8340	11305	7445	7450	10239	9969	9299	6144	8338	9427	8481	6790	7753	10036	8403	13770	9036	11382	8387	7409	11597	6341	11712	9020	7845	9043	18037	8965	8436	13059	11187	8704
463	209687	unidentified compound			651164	101	209687	85 81506.0 86 84784.0 87 98814.0 88 67735.0 89 778209.0 90 68703.0 91 37968.0 92 6923.0 94 8963.0 95 7904.0 96 10858.0 97 38335.0 98 20485.0 99 89752.0 100 150936.0 101 345818.0 102 142654.0 103 1263719.0 104 124756.0 105 364949.0 106 39282.0 107 13495.0 108 5045.0 109 4838.0 110 14820.0 111 40907.0 112 29547.0 113 77217.0 114 153915.0 115 148906.0 116 118143.0 117 1228985.0 118 121349.0 119 1252…	795399	826875	818667	804452	819462	823935	759517	800622	796092	183473	775167	224345	261208	827973	815922	193033	787190	805531	811984	208604	810940	792841	793964	807191	807202	776677	310332	813187	810433	264395	799726	210526	802076	801583	808840	823861	803550	803217	789653	258825	794390
464	209671	unidentified compound			339954	179	209671	91:246.0 92:101.0 93:171.0 95:68.0 97:61.0 104:71.0 105:20772.0 106:1553.0 107:275.0 110:102.0 118:74.0 119:213.0 121:280.0 122:98.0 135:12922.0 136:1718.0 137:461.0 178:71.0 179:14739.0 180:2023.0 181:628.0 193:251.0 194:871.0 195:121.0 196:35.0 323:21.0	17165	218985	17199	8259	7668	50165	8263	7425	8836	8673	9393	9116	11095	15022	97961	13115	7076	10399	10936	14350	19217	11369	12942	11533	18397	12994	163703	11835	9721	12544	9831	10390	7812	7675	11380	13644	7375	12295	110401	10143	10237
465	209167	unidentified compound			778746	339	209167	85:3872.0 86:566.0 87:1241.0 88:607.0 89:2769.0 90:148.0 91:2232.0 92:922.0 93:6077.0 94:371.0 95:7828.0 96:11170.0 97:5823.0 98:12313.0 99:1884.0 102:485.0 104:128.0 105:3581.0 107:1313.0 108:664.0 109:2748.0 110:4966.0 111:5154.0 112:1729.0 113:601.0 114:168.0 116:3461.0 117:45835.0 118:5820.0 119:3652.0 120:852.0 121:815.0 122:664.0 123:4223.0 124:1676.0 125:925.0 127:589.0 128:263.0 129:41102…	6522	4768	4856	3464	6880	5606	10077	5903	9214	6170	5291	2147	9616	6632	4314	4113	3277	5784	6947	9125	3669	4518	2031	2645	2648	5781	4467	2425	3337	6333	2810	6446	2793	4002	4360	9269	3310	6163	5255	4483	1978
466	208646	unidentified compound			353266	85	208646	85 10624.0 86 729.0 87 334.0 88 131.0 91 161.0 92 57.0 97 367.0 98 216.0 99 2255.0 103 391.0 106 39.0 107 159.0 110 21.0 111 43.0 112 126.0 113 1212.0 115 270.0 118 101.0 119 114.0 123 76.0 126 353.0 127 524.0 128 94.0 129 81.0 131 577.0 133 474.0 134 209.0 137 71.0 141 118.0 145 9.0 146 181.0 147 3275.0 149 322.0 150 100.0 151 65.0 152 27.0 153 158.0 154 67.0 155 350.0 156 155.0 157 63.0 160 23.…	17323	17318	12008	18184	21353	20115	20174	22024	17658	26431	24250	22914	25343	15224	11945	20849	19858	22342	29160	24468	22978	20659	20641	25095	22959	12127	18373	21176	22662	23788	21224	35242	31678	33685	35710	38087	33242	13563	18106	24494	40665
467	191801	unidentified compound			469696	217	191801	85 32.0 87 6.0 88 71.0 89 203.0 91 8.0 94 1.0 96 6.0 98 6.0 99 13.0 100 23.0 101 242.0 102 15.0 103 1515.0 104 107.0 105 28.0 106 17.0 110 57.0 111 2.0 113 5.0 115 82.0 116 267.0 117 1222.0 118 94.0 119 56.0 122 1.0 126 4.0 127 16.0 129 407.0 131 151.0 132 25.0 133 447.0 134 104.0 135 31.0 136 4.0 137 4.0 139 11.0 147 2205.0 148 344.0 149 238.0 150 9.0 152 1.0 154 7.0 155 5.0 162 8.0 163 9.0 164 …	3504	4422	38107	1385	8294	8738	11206	8739	9917	8125	10325	10534	10680	13634	11608	13231	7928	10777	11930	16035	7847	8003	9930	2269	5341	2746	12641	19080	2352	13095	9201	10959	10182	7392	12023	18628	9364	12577	13504	12038	16402
468	189028	unidentified compound			878507	204	189028	90:16.0 95:16.0 97:100.0 100:104.0 101:85.0 103:164.0 105:70.0 116:34.0 117:1287.0 122:115.0 129:806.0 130:399.0 136:224.0 139:31.0 147:492.0 155:137.0 165:31.0 169:160.0 178:20.0 179:48.0 184:198.0 189:146.0 191:2.0 194:32.0 199:35.0 203:38.0 204:5472.0 205:1718.0 206:522.0 207:801.0 208:325.0 210:33.0 217:672.0 218:238.0 219:84.0 229:13.0 231:100.0 243:61.0 245:209.0 249:4.0 251:9.0 266:18.0 28…	5715	1915	6179	3186	2481	2182	8170	3049	2720	3971	4407	2747	1906	4969	2266	2306	2695	3671	3980	6287	3380	3183	4703	3762	5468	6639	5289	3076	5723	6714	6848	5036	4309	3489	5562	11237	4260	8148	5722	4796	4453
469	188923	unidentified compound			763772	204	188923	85:1717.0 86:200.0 87:1201.0 89:2365.0 90:221.0 91:96.0 93:39.0 95:257.0 97:283.0 98:130.0 99:1976.0 100:746.0 101:5601.0 102:804.0 103:20741.0 104:1823.0 105:703.0 107:319.0 109:991.0 110:244.0 111:765.0 113:1546.0 114:226.0 115:1210.0 116:3830.0 117:9967.0 118:1334.0 119:959.0 125:24.0 127:745.0 128:158.0 129:19261.0 130:2633.0 131:9530.0 132:3348.0 133:8395.0 134:1814.0 135:428.0 137:20.0 139:…	8509	1790	3486	2170	3042	1430	12078	2198	2233	2956	3445	2800	2021	7608	3513	3211	2017	3955	4141	4125	2950	2092	6572	2941	3396	9395	4430	2141	3551	6487	4111	3231	3118	2686	4617	11169	4041	9087	4298	4931	2126
470	172624	unidentified compound			373389	199	172624	86:201.0 88:667.0 89:626.0 93:643.0 95:332.0 96:495.0 98:266.0 106:419.0 107:2024.0 113:541.0 115:491.0 116:2195.0 117:25835.0 118:2993.0 119:1308.0 123:226.0 124:571.0 125:296.0 129:8683.0 130:1867.0 131:7137.0 132:2786.0 133:1975.0 139:88.0 145:7565.0 154:188.0 155:993.0 157:18.0 160:71.0 162:42.0 165:37.0 167:54.0 169:26.0 199:13077.0 200:2261.0 201:685.0 208:46.0 240:13.0 241:71.0 299:140.0 4…	174047	207321	178371	146516	158625	169678	151512	165760	144534	163113	170418	162440	158811	183410	169055	185442	146604	165206	187163	181151	153322	173671	184088	188286	162460	166172	172749	162890	167743	184669	164811	188597	179471	176805	176706	165894	178690	178690	187206	173386	192594
471	171303	unidentified compound			471069	85	171303	85:13449.0 86:787.0 87:773.0 88:493.0 95:219.0 97:391.0 98:307.0 99:3588.0 100:333.0 101:2338.0 103:1308.0 105:707.0 110:187.0 111:213.0 112:636.0 113:2470.0 115:854.0 117:998.0 118:312.0 119:822.0 129:1102.0 131:686.0 132:259.0 133:461.0 134:284.0 138:43.0 140:120.0 141:459.0 143:53.0 147:3646.0 155:214.0 158:44.0 168:39.0 169:261.0 173:37.0 184:35.0 188:30.0 189:227.0 190:280.0 191:2238.0 193:1…	6769	8445	8180	8158	10224	8141	9401	7722	8714	9591	10283	8555	10441	6079	5905	8044	9051	9376	13150	8158	7028	7153	6993	8436	10556	1877	7741	10233	10307	7737	7561	12699	10890	10580	15548	13223	14187	8105	7278	10964	13883
472	171286	unidentified compound			640915	189	171286	86:595.0 87:724.0 88:239.0 89:5336.0 91:551.0 93:116.0 94:88.0 97:484.0 98:356.0 99:877.0 100:481.0 101:1500.0 103:14905.0 105:3141.0 111:644.0 112:213.0 113:580.0 115:1071.0 116:483.0 117:2797.0 118:586.0 119:277.0 124:56.0 125:90.0 126:379.0 129:9490.0 130:859.0 131:2698.0 133:7673.0 134:1031.0 135:419.0 136:84.0 137:67.0 141:270.0 142:665.0 143:1826.0 144:240.0 145:271.0 147:11372.0 148:1591.0…	21406	22608	22935	17580	20810	19806	16394	21119	19779	20581	28251	24918	20685	13811	12663	24675	17600	17868	25662	25327	16832	25612	20244	25798	25557	10031	19756	32574	21470	22832	17340	26404	27995	22799	19678	21119	19826	9610	21414	29092	26921
473	170806	unidentified compound			504524	99	170806	85:101.0 89:98.0 93:167.0 95:58.0 97:28.0 99:5869.0 100:359.0 101:81.0 103:286.0 104:201.0 105:192.0 107:215.0 111:73.0 112:26.0 116:33.0 117:944.0 118:194.0 119:142.0 123:182.0 124:14.0 125:68.0 127:84.0 131:168.0 133:342.0 134:45.0 135:55.0 136:24.0 137:29.0 138:6.0 141:139.0 142:34.0 145:85.0 149:152.0 151:71.0 153:16.0 154:10.0 157:80.0 160:64.0 163:30.0 165:126.0 167:107.0 169:168.0 170:30.0…	3992	4511	4532	3678	5983	6146	5718	8622	6433	7865	10768	7874	6540	8715	8847	8081	7543	10835	10886	14248	7746	6903	11168	11998	7468	8437	13084	10329	8514	13595	10621	11784	11682	10374	14499	18866	13693	16876	16456	13089	20078
474	170242	unidentified compound			641280	179	170242	85:170.0 87:84.0 88:233.0 89:614.0 90:475.0 91:101.0 98:51.0 102:175.0 103:7017.0 104:702.0 105:877.0 107:132.0 109:45.0 110:100.0 112:49.0 113:85.0 114:528.0 115:299.0 116:599.0 117:2636.0 118:203.0 123:38.0 126:101.0 129:590.0 130:316.0 132:110.0 134:255.0 135:263.0 140:91.0 145:126.0 146:67.0 147:1637.0 148:1413.0 149:763.0 150:141.0 151:93.0 152:47.0 157:361.0 162:40.0 163:302.0 165:127.0 166…	4246	5255	3159	5305	6509	6794	5000	4782	5169	4879	6042	6371	7573	3123	3930	6330	5356	4842	8078	9267	4006	4460	6128	5807	12418	2623	3479	3929	6104	8844	5366	7375	5479	7087	3454	6380	6478	2543	5128	7369	6928
475	170069	unidentified compound			280835	145	170069	87:587.0 89:557.0 91:409.0 96:190.0 98:189.0 99:1642.0 101:1126.0 103:1385.0 104:607.0 105:630.0 106:109.0 109:118.0 112:182.0 113:479.0 115:2063.0 118:1242.0 119:483.0 120:140.0 123:36.0 124:13.0 126:256.0 128:210.0 129:1513.0 131:3446.0 132:418.0 133:6444.0 136:76.0 139:32.0 141:44.0 143:692.0 144:1141.0 145:57367.0 146:9593.0 147:35591.0 148:7582.0 149:4899.0 150:445.0 151:226.0 152:53.0 153:7…	56809	55222	62615	18051	28751	14995	67634	72350	24527	28481	32752	85732	21832	58494	50019	31381	31821	28595	30497	67504	16893	28158	38382	51707	80162	52540	51145	33070	54039	258423	229000	47515	143251	36592	44344	25299	44896	55695	59274	35066	58119
476	168759	unidentified compound			750627	204	168759	85 31515.0 86 12163.0 87 16685.0 88 9051.0 89 38137.0 90 5084.0 91 9671.0 92 1932.0 93 17991.0 94 3921.0 95 43375.0 96 7246.0 97 41185.0 98 32303.0 99 24096.0 100 4045.0 101 49827.0 102 9873.0 103 268550.0 104 26067.0 105 34145.0 106 3343.0 107 9345.0 108 1566.0 109 15890.0 110 3368.0 111 22769.0 112 8952.0 113 9921.0 114 2585.0 115 15850.0 116 53685.0 117 693467.0 118 68926.0 119 33687.0 120 234…	18332	3109	9873	6155	5284	5490	16397	4655	4743	6318	6336	2935	1129	14588	11370	4530	5250	6298	7750	10476	5103	4299	11558	3223	13062	18739	9168	6076	8523	13787	7934	7539	4834	6636	11577	23642	7941	810	11961	7782	6759
477	163872	unidentified compound			513029	217	163872	87:35.0 89:442.0 101:1396.0 102:136.0 103:1291.0 104:157.0 105:237.0 111:403.0 113:70.0 114:91.0 115:204.0 116:299.0 117:1416.0 119:148.0 129:6105.0 130:521.0 131:1451.0 132:230.0 133:2978.0 134:277.0 135:189.0 143:1880.0 144:120.0 145:60.0 147:7779.0 148:1069.0 149:553.0 150:50.0 155:106.0 172:44.0 174:185.0 175:145.0 189:51.0 191:64.0 203:319.0 204:79.0 205:251.0 213:20.0 215:69.0 216:352.0 217…	577	407	362	640	545	466	917	675	597	521	752	571	665	781	523	537	495	700	479	842	1010	653	964	649	1245	705	955	1033	648	1101	848	869	962	725	1206	1620	827	1019	1083	1209	1109
478	161878	unidentified compound			361182	341	161878	87:472.0 90:124.0 93:639.0 94:73.0 95:148.0 97:68.0 104:150.0 105:146.0 108:87.0 120:48.0 121:131.0 124:31.0 125:98.0 126:161.0 127:384.0 134:637.0 137:64.0 138:37.0 139:53.0 140:134.0 147:3817.0 148:637.0 149:365.0 154:112.0 155:718.0 161:91.0 163:671.0 164:157.0 165:213.0 166:43.0 167:40.0 168:32.0 173:25.0 175:30.0 177:163.0 178:59.0 179:333.0 180:26.0 181:121.0 182:58.0 185:14.0 188:37.0 189:…	8398	7864	2899	2656	2338	2988	2128	1227	4971	3976	3010	2865	1437	2923	12706	3550	5930	2719	3198	9487	4790	4153	4843	6291	4514	5354	4490	5124	5029	7608	5488	5894	2370	6176	7174	7265	7096	14005	1705	7971	9009
479	161875	unidentified compound			386583	217	161875	85:1641.0 89:407.0 91:1339.0 94:146.0 96:602.0 98:405.0 103:1131.0 104:363.0 105:356.0 106:265.0 107:401.0 109:152.0 110:8071.0 111:4985.0 112:1416.0 114:1107.0 115:613.0 116:934.0 119:563.0 122:85.0 123:124.0 124:95.0 125:183.0 127:1938.0 128:449.0 129:8901.0 130:3350.0 131:2561.0 132:859.0 133:3029.0 137:227.0 141:92.0 142:1635.0 143:14179.0 144:1950.0 145:1560.0 147:15998.0 148:2835.0 149:2500…	429	388	291	340	368	446	541	445	394	451	482	590	518	630	535	310	481	467	567	932	602	499	590	541	504	599	784	776	767	516	688	927	718	645	991	790	728	669	695	947	848
480	161085	unidentified compound			319344	147	161085	85:1344.0 86:275.0 87:723.0 88:283.0 89:430.0 90:82.0 91:148.0 92:101.0 93:93.0 99:638.0 101:1418.0 102:400.0 103:6836.0 104:593.0 105:844.0 111:159.0 112:132.0 113:605.0 114:37.0 115:1147.0 116:490.0 117:803.0 119:243.0 120:114.0 129:2049.0 130:358.0 131:1674.0 132:342.0 133:5015.0 134:634.0 135:230.0 137:34.0 143:3710.0 144:1301.0 145:500.0 147:39781.0 148:6372.0 149:4771.0 150:460.0 151:242.0 …	15769	6667	13626	5780	5123	6377	8797	9727	12853	7284	11249	5715	9822	15300	4320	10781	6663	14192	16387	16545	4315	1540	7007	13309	9951	7527	5554	6396	14569	10809	3835	6849	6078	6685	9454	9454	9137	15390	11430	8159	9660
481	160543	unidentified compound			737233	213	160543	86:156.0 87:133.0 88:104.0 89:113.0 97:785.0 98:251.0 103:2327.0 104:155.0 114:120.0 116:401.0 117:829.0 123:63.0 132:159.0 144:801.0 148:269.0 156:68.0 158:108.0 160:96.0 172:330.0 174:30.0 185:208.0 188:93.0 199:134.0 213:4091.0 214:917.0 215:204.0 216:1237.0 226:19.0 232:738.0 233:204.0 241:1961.0 242:371.0 243:156.0 262:355.0 290:873.0 291:274.0 331:593.0 332:102.0 388:35.0 428:29.0	3486	2705	409	1850	2770	2511	5157	3328	3142	2849	3528	3231	3760	4063	3850	2580	3043	3818	4206	6101	3016	4051	5371	4980	5640	5497	4559	4412	5074	5574	5044	4586	5030	4025	4653	9856	5167	4865	4707	5860	4685
482	146585	unidentified compound			348125	124	146585	85:21115.0 86:596.0 91:384.0 92:116.0 93:1588.0 94:6754.0 95:671.0 96:845.0 97:1038.0 103:18551.0 104:1725.0 105:380.0 108:1386.0 110:1261.0 112:688.0 124:29360.0 125:3609.0 126:2523.0 129:806.0 142:589.0 143:215.0 145:342.0 150:39.0 152:218.0 154:221.0 155:160.0 156:438.0 157:523.0 158:2999.0 159:913.0 168:9693.0 169:1302.0 170:682.0 171:458.0 183:4268.0 184:1387.0 186:7576.0 187:1222.0 197:104.…	205	3802	365	411	3174	653	3036	698	370	715	871	739	503	606	910	798	743	989	1348	1177	1094	285	1134	1105	761	225	1067	1019	287	1909	854	1109	1145	1423	1349	1517	1628	1270	1784	1617	2804
483	145503	unidentified compound			596034	232	145503	86:874.0 89:92.0 90:44.0 98:164.0 99:408.0 101:325.0 102:660.0 107:111.0 114:79.0 116:256.0 124:42.0 127:437.0 128:322.0 129:41.0 130:390.0 131:117.0 133:233.0 135:65.0 136:32.0 139:52.0 141:330.0 144:524.0 147:2510.0 148:722.0 150:26.0 151:62.0 152:563.0 153:685.0 154:248.0 155:1318.0 156:220.0 158:49.0 159:62.0 160:51.0 163:113.0 164:31.0 165:267.0 166:123.0 168:24.0 169:249.0 173:46.0 178:63.0…	2914	10540	11401	2973	2827	2802	4810	4352	2630	8091	4013	4203	4298	4141	5250	4972	3703	6368	9434	2025	2739	4413	5816	3049	4102	4201	5604	3978	5154	6012	4504	6082	4462	3376	2788	14185	9371	3540	6196	5719	3261
484	145494	unidentified compound			589733	241	145494	85 2053.0 86 125.0 90 50.0 91 78.0 92 419.0 94 269.0 95 804.0 96 5970.0 97 1061.0 98 1244.0 99 1092.0 100 801.0 102 223.0 104 418.0 105 152.0 107 132.0 108 161.0 111 159.0 113 1936.0 116 440.0 117 297.0 118 544.0 119 157.0 120 591.0 121 372.0 123 1974.0 124 2627.0 125 484.0 126 406.0 129 663.0 130 317.0 133 467.0 134 338.0 137 114.0 138 123.0 141 106.0 142 907.0 143 103.0 144 4072.0 145 789.0 146…	1596	2606	1364	1389	1584	1044	1824	1905	1247	1730	2522	1976	1874	3071	3223	2090	2665	2379	2524	4288	2966	2733	3410	3384	3541	4271	5136	2336	5054	5906	6938	5126	4179	4110	4956	8052	5443	5493	8661	10776	9670
485	135260	unidentified compound			564758	275	135260	85:490.0 87:328.0 88:96.0 89:4491.0 91:278.0 98:198.0 100:1674.0 101:923.0 102:806.0 105:121.0 107:78.0 109:62.0 111:97.0 112:244.0 113:345.0 114:322.0 115:427.0 116:503.0 117:1642.0 118:320.0 119:231.0 127:529.0 128:1646.0 130:631.0 132:26.0 133:1406.0 139:61.0 140:42.0 141:85.0 142:651.0 144:775.0 145:466.0 146:345.0 147:1531.0 149:269.0 150:93.0 151:42.0 153:152.0 154:140.0 155:2147.0 156:1295…	1376	2215	2927	1619	1611	1932	1640	2343	1641	2268	2589	2771	2451	1139	1481	1913	2081	1994	2341	1778	1445	2699	2267	2880	1640	1123	1482	2112	2535	1917	1770	2499	2672	3033	2429	2335	2579	755	1826	3040	2602
486	134328	unidentified compound			788991	204	134328	85 1350.0 86 192.0 87 123.0 88 402.0 89 790.0 90 923.0 91 242.0 94 123.0 99 2998.0 100 4021.0 101 3706.0 102 590.0 103 7943.0 104 2772.0 105 649.0 106 245.0 109 240.0 110 254.0 113 961.0 115 3097.0 116 1099.0 118 1928.0 119 3351.0 120 437.0 121 71.0 124 244.0 126 842.0 128 215.0 129 3939.0 130 2654.0 131 5957.0 132 2192.0 133 5455.0 134 517.0 135 324.0 141 303.0 143 1372.0 144 509.0 146 1420.0 14…	48317	12492	44728	12828	13903	14056	44130	21583	17545	23984	29759	15723	18096	51108	34995	16767	12234	32953	26933	33241	17250	18754	35051	18008	28628	58330	27567	14696	27556	38173	26173	31226	32623	23034	26419	62420	17338	69124	33402	29747	28708
487	133943	unidentified compound			377177	227	133943	85:630.0 88:989.0 89:674.0 90:323.0 96:99.0 97:312.0 98:245.0 99:400.0 100:12525.0 101:2370.0 102:831.0 103:3281.0 108:440.0 110:2541.0 113:275.0 114:596.0 115:312.0 116:387.0 117:2748.0 118:658.0 120:116.0 121:80.0 126:225.0 127:817.0 128:497.0 129:400.0 130:2014.0 132:713.0 133:941.0 134:3028.0 135:873.0 136:219.0 138:90.0 147:10246.0 148:1805.0 150:241.0 152:132.0 153:51.0 155:193.0 157:205.0 …	1524	1576	511	733	805	910	896	1021	849	1027	1119	948	1086	1156	985	1119	934	1114	1374	1030	785	1680	1232	1385	1404	1892	1833	1842	1847	1657	1022	1687	1514	1105	1555	1764	1371	1319	1690	1408	1492
488	133242	unidentified compound			391113	85	133242	85:22076.0 86:1685.0 89:369.0 95:92.0 96:90.0 97:535.0 98:371.0 99:4410.0 100:116.0 102:320.0 110:237.0 111:360.0 112:1037.0 113:3145.0 114:294.0 115:238.0 123:34.0 124:89.0 125:183.0 126:435.0 127:1340.0 128:110.0 140:387.0 141:2882.0 142:416.0 153:19.0 154:38.0 156:33.0 168:51.0 169:286.0 170:52.0 197:51.0 210:31.0 228:25.0 240:42.0 284:16.0 287:16.0 297:14.0 446:19.0	3645	7412	4816	4466	5291	6234	6267	5566	6140	6214	7250	6924	5419	3572	5247	5451	6106	7345	8882	7636	6793	5031	6238	8026	7138	3872	7117	6244	6327	6132	7349	8615	8326	7852	8899	11393	8261	4295	5205	8699	10031
489	132414	unidentified compound			519131	99	132414	85:97.0 86:211.0 96:43.0 97:174.0 98:694.0 99:5805.0 100:960.0 101:214.0 102:129.0 103:858.0 104:78.0 109:125.0 112:359.0 115:130.0 116:56.0 119:209.0 126:886.0 129:116.0 130:441.0 131:129.0 135:37.0 139:150.0 143:144.0 144:141.0 145:250.0 146:697.0 156:908.0 157:73.0 158:1428.0 159:183.0 171:36.0 172:36.0 173:172.0 174:102.0 182:51.0 183:296.0 194:25.0 197:53.0 199:117.0 201:273.0 202:71.0 211:2…	3572	2746	960	1372	1442	1615	4716	2507	1743	2170	1735	1411	2168	4241	2248	2413	2166	2336	3591	5205	3206	5081	4635	3731	3641	8506	7847	3883	4998	5251	7673	9440	7110	4610	6744	15032	4887	11701	9741	10021	8081
490	131694	unidentified compound			473266	140	131694	86:924.0 87:166.0 88:284.0 89:337.0 90:965.0 91:351.0 92:70.0 93:111.0 96:94.0 97:566.0 100:813.0 102:401.0 106:31.0 107:354.0 108:217.0 110:1022.0 112:351.0 113:100.0 114:338.0 115:185.0 118:252.0 119:89.0 120:55.0 121:45.0 124:20.0 127:168.0 130:520.0 131:301.0 132:137.0 133:378.0 134:3455.0 135:354.0 136:168.0 137:36.0 138:38.0 140:6075.0 141:210.0 142:41.0 143:231.0 144:1720.0 145:240.0 146:7…	3045	1710	880	1863	2301	1743	2510	2505	1898	2334	2711	933	2407	2722	2558	2371	2542	2039	2699	3724	3102	3025	2158	3695	3261	3248	2216	2132	1016	3978	3264	3078	3428	2886	2356	3329	2403	4210	3904	3626	3631
491	125802	unidentified compound			891034	204	125802	85:128.0 86:55.0 87:241.0 88:172.0 89:1092.0 90:81.0 91:84.0 94:58.0 99:68.0 101:1298.0 102:235.0 103:10107.0 104:763.0 105:383.0 111:90.0 113:255.0 114:101.0 115:413.0 116:605.0 117:4206.0 118:405.0 119:364.0 120:62.0 121:61.0 126:54.0 127:256.0 128:61.0 129:11444.0 130:1321.0 131:1687.0 132:167.0 133:2588.0 134:303.0 135:151.0 137:29.0 139:75.0 140:44.0 141:160.0 142:89.0 143:1116.0 144:58.0 14…	2907	986	5125	2257	1658	1345	4232	1964	1938	2389	3747	1392	2038	3524	5160	1353	1381	2815	2839	4192	1498	1593	3923	1741	2730	4035	3276	1145	2978	4814	3073	3514	2418	2101	2746	5922	2734	4668	3744	2826	2315
492	125788	unidentified compound			977394	204	125788	85:169.0 87:493.0 89:135.0 99:226.0 101:1387.0 103:5976.0 104:55.0 105:180.0 113:216.0 114:30.0 116:421.0 117:1633.0 118:18.0 126:69.0 128:67.0 129:6878.0 130:750.0 131:2201.0 132:291.0 133:2262.0 134:32.0 135:74.0 138:17.0 140:50.0 142:140.0 143:997.0 144:24.0 147:8926.0 148:1653.0 149:749.0 154:36.0 155:199.0 157:627.0 161:244.0 165:35.0 167:31.0 169:882.0 171:122.0 172:24.0 174:47.0 175:140.0 …	2353	860	4337	924	1047	728	6234	1390	1181	1987	1737	1182	787	3461	3369	1226	1235	2452	2700	2812	1263	838	1830	1067	1862	3468	2112	871	2674	2873	1706	2164	1938	1356	2037	298	1639	4472	3024	3355	2213
493	122151	unidentified compound			294155	99	122151	85:146.0 86:5949.0 87:534.0 88:330.0 89:225.0 91:79.0 92:23.0 93:32.0 95:50.0 96:155.0 97:116.0 99:11442.0 100:559.0 102:146.0 103:157.0 105:99.0 106:28.0 126:75.0 132:43.0 146:301.0 168:141.0 170:114.0 180:14.0 188:93.0 316:13.0 318:14.0 319:6.0 324:18.0 366:12.0 374:15.0 380:14.0 387:14.0 403:14.0 413:14.0 426:30.0 432:13.0 433:14.0 499:18.0	55739	47760	12971	32108	40610	41026	56123	64806	45952	59279	71092	51601	43536	92167	73037	82762	71502	76017	73167	119516	80898	78947	110575	89850	65354	104763	113847	75445	87960	132270	104671	164292	137719	109809	139225	164213	118522	154146	172241	122641	147958
494	120815	unidentified compound			831141	361	120815	86 434.0 87 393.0 88 210.0 89 834.0 93 76.0 94 96.0 99 234.0 100 4087.0 101 1106.0 102 622.0 103 5115.0 104 302.0 105 310.0 107 74.0 109 385.0 110 97.0 111 165.0 112 105.0 113 229.0 114 1492.0 115 2032.0 116 2063.0 117 2760.0 118 295.0 119 372.0 128 278.0 129 4042.0 130 830.0 131 1618.0 132 477.0 133 2126.0 134 157.0 135 130.0 139 50.0 142 222.0 143 668.0 144 428.0 145 201.0 146 162.0 147 11009.0…	3570	1148	3859	1686	2143	1702	4355	1951	2358	2461	3006	1851	1338	3904	5238	1437	1633	3534	3380	2710	2131	2249	3377	2219	2565	4676	3988	1960	3161	3752	3545	3959	2500	2951	3473	6255	2707	5462	4454	3331	2998
495	120744	unidentified compound			291594	132	120744	86:1063.0 87:242.0 88:1085.0 89:1574.0 90:245.0 91:99.0 93:81.0 100:1243.0 102:473.0 103:325.0 105:189.0 111:42.0 112:101.0 115:1102.0 116:390.0 117:725.0 118:517.0 119:408.0 120:84.0 121:46.0 124:45.0 125:62.0 126:75.0 127:90.0 129:76.0 130:465.0 131:555.0 132:12267.0 133:5498.0 134:1606.0 135:428.0 136:87.0 137:57.0 143:47.0 146:619.0 147:2457.0 148:383.0 149:146.0 155:44.0 160:312.0 161:83.0 1…	2112	3152	5673	5490	8340	472	8174	10697	6014	15085	16570	9693	9668	16084	14388	22297	9437	16100	16115	18340	13226	4092	21473	19367	11987	3947	19985	12630	2797	23054	14215	25526	20924	22825	21047	17392	20779	19370	34620	20533	24335
496	120562	unidentified compound			475084	98	120562	98:6741.0 100:212.0 101:112.0 102:564.0 103:798.0 104:118.0 114:18.0 115:31.0 117:125.0 125:62.0 126:139.0 129:186.0 130:232.0 143:65.0 144:151.0 147:222.0 154:45.0 170:105.0 171:760.0 172:143.0 173:85.0 178:18.0 185:41.0 187:151.0 195:21.0 200:1249.0 201:189.0 208:36.0 213:37.0 215:54.0 217:52.0 224:22.0 225:32.0 228:32.0 230:27.0 231:23.0 236:30.0 238:16.0 248:43.0 250:19.0 252:18.0 258:33.0 26…	27174	30102	29966	24924	27296	19754	31431	31100	21039	27633	32282	27001	25907	38884	41920	35772	31201	27579	36072	50301	37302	27723	39039	39251	47125	36926	57142	29863	40669	59693	62009	46597	42562	42636	44441	71890	53088	51829	68391	96428	76106
497	120526	unidentified compound			294844	99	120526	85:65.0 87:130.0 89:44.0 93:21.0 96:102.0 97:37.0 98:194.0 99:5515.0 100:238.0 104:29.0 107:175.0 110:24.0 113:43.0 118:28.0 121:61.0 131:104.0 149:39.0 171:80.0 178:31.0 180:22.0 182:25.0 190:26.0 265:29.0 362:19.0 384:23.0 396:21.0 433:30.0 436:17.0 438:19.0 445:28.0 447:18.0 468:25.0 470:22.0 472:20.0 476:37.0 478:22.0 482:16.0	55739	58025	12971	32108	48422	49088	71173	75361	54016	69711	86802	60791	52540	92167	86222	82762	59940	91503	88500	119516	93694	91539	110575	107345	79103	124246	133957	88317	101688	132270	120747	164292	137719	131682	139225	191766	142781	154146	172241	147823	171809
498	120466	unidentified compound			648626	204	120466	109:802.0 155:1164.0 169:2456.0 191:61184.0 192:11107.0 193:4885.0 194:375.0 204:137473.0 243:1663.0 317:624.0 361:219.0 362:81.0 394:123.0 396:17.0 398:12.0 435:336.0 436:201.0	4768585	377660	1391426	724015	746235	503459	5879831	1051585	948400	887463	1007040	683867	805404	4536791	1526456	534819	685337	1452145	941241	1448648	559410	542573	1692556	703167	3296919	4924076	1627096	880620	1364057	1738419	837596	1272802	214920	954757	1319478	4684376	897527	6250494	1701530	1223003	546374
499	119167	unidentified compound			926703	132	119167	85:157.0 86:158.0 87:118.0 88:126.0 89:972.0 90:87.0 91:1314.0 92:114.0 94:72.0 95:82.0 98:76.0 99:85.0 100:175.0 101:208.0 102:93.0 103:3884.0 104:626.0 105:1078.0 106:50.0 107:87.0 108:49.0 111:55.0 113:98.0 114:96.0 115:99.0 116:176.0 117:1633.0 118:286.0 119:238.0 120:78.0 121:51.0 124:37.0 125:59.0 128:187.0 129:434.0 130:574.0 131:424.0 132:4126.0 133:1177.0 134:88.0 135:155.0 136:56.0 137:…	1157	4933	11046	1475	1705	1703	2839	1851	1415	2103	4017	2134	2162	785	4122	1446	2859	2478	2903	3296	2038	3023	2265	2498	3129	1529	4235	2048	2429	2554	2654	2983	2386	2347	2332	2930	2198	974	4413	2383	3999
500	119129	unidentified compound			750680	103	119129	85:168.0 86:286.0 88:467.0 89:644.0 90:85.0 91:64.0 94:39.0 95:120.0 96:90.0 99:47.0 101:213.0 102:104.0 103:5514.0 104:326.0 105:253.0 106:49.0 107:79.0 108:38.0 110:40.0 111:60.0 114:165.0 115:131.0 116:204.0 118:63.0 119:164.0 120:26.0 121:24.0 122:18.0 123:31.0 125:51.0 126:73.0 128:74.0 130:231.0 131:171.0 133:734.0 134:124.0 137:13.0 139:46.0 140:39.0 141:55.0 142:405.0 143:241.0 144:53.0 1…	4354	4119	7808	2919	3463	2712	6058	4084	3856	1486	4852	3288	3616	3457	3092	3194	3931	4158	4415	1829	4622	4373	3659	4241	4438	5754	6614	4282	4744	5102	3362	5724	3446	1601	4807	7330	1872	5097	6656	5018	1331
501	119124	unidentified compound			375011	126	119124	89:54.0 91:33.0 93:32.0 96:488.0 97:166.0 98:387.0 104:198.0 108:1177.0 109:102.0 110:31.0 111:59.0 119:11.0 124:37.0 126:3999.0 127:290.0 128:59.0 129:99.0 132:31.0 135:53.0 138:83.0 148:232.0 152:239.0 153:28.0 162:30.0 171:90.0 180:148.0 187:16.0 195:582.0 221:16.0 231:12.0 338:11.0	9573	11217	10078	7842	8822	9617	8854	9680	8387	9098	10403	8902	9166	10635	10218	11088	8706	9813	11197	10900	8859	9817	10934	11190	9276	10312	10484	9209	9773	11326	9702	11000	10334	10603	10992	10354	10256	11453	11346	10350	11616
502	119054	unidentified compound			958948	204	119054	85:889.0 86:270.0 87:430.0 88:294.0 89:543.0 90:189.0 91:378.0 92:59.0 93:87.0 94:122.0 95:337.0 96:106.0 97:454.0 98:130.0 99:582.0 101:2305.0 102:493.0 103:7317.0 104:690.0 105:232.0 107:112.0 109:319.0 111:748.0 112:168.0 113:498.0 114:188.0 115:3136.0 116:1787.0 117:6097.0 118:622.0 119:477.0 120:85.0 122:29.0 123:110.0 125:207.0 127:615.0 128:519.0 129:9144.0 130:4347.0 131:5178.0 132:657.0 …	1417	538	2391	795	997	870	3659	461	918	1122	1350	862	960	1477	1825	1044	689	1666	1445	1913	1252	721	1204	563	2133	1868	886	1217	797	1815	1289	1921	711	1112	1199	2872	1070	2116	1066	1596	3242
503	119023	unidentified compound			873486	103	119023	85:1196.0 86:984.0 87:1252.0 88:897.0 89:11086.0 90:889.0 91:655.0 94:448.0 95:879.0 96:13146.0 97:3627.0 98:6149.0 99:1476.0 100:1406.0 101:3508.0 102:1399.0 103:54929.0 104:5536.0 105:2860.0 106:592.0 107:1813.0 108:507.0 109:259.0 110:240.0 111:499.0 112:780.0 113:1463.0 114:1084.0 115:955.0 116:1138.0 117:11584.0 118:1226.0 119:1397.0 120:276.0 121:171.0 122:266.0 123:2227.0 124:287.0 125:248…	7031	8956	2133	2408	3783	2609	3860	4592	4705	5463	4318	11459	5149	10334	7189	3452	4279	3486	2505	1690	4851	10599	6681	6146	1522	8025	5441	1169	3529	4597	5215	4064	7760	1579	13636	13590	5924	13254	6332	15483	6698
504	115895	unidentified compound			331584	191	115895	87:168.0 88:341.0 90:48.0 91:133.0 96:80.0 99:37.0 100:125.0 103:1059.0 105:247.0 109:31.0 110:446.0 113:34.0 115:288.0 116:181.0 117:353.0 118:72.0 119:188.0 126:150.0 129:285.0 131:1003.0 132:108.0 133:1812.0 134:151.0 135:130.0 136:80.0 137:11.0 146:30.0 147:8659.0 148:1589.0 149:1040.0 150:121.0 151:32.0 157:128.0 159:17.0 175:33.0 177:401.0 178:67.0 179:39.0 181:20.0 182:24.0 186:35.0 187:30…	101765	207370	130743	141743	172455	187631	151512	174578	159414	15505	209999	17161	13545	173912	175290	145571	165384	231967	281420	196022	17677	118148	193642	182927	176199	125807	186732	163804	10581	207035	155799	179618	143574	169570	190637	211371	178140	167429	219900	172632	229321
505	112264	unidentified compound			385239	183	112264	85:1756.0 86:3785.0 87:724.0 88:526.0 90:132.0 91:143.0 92:82.0 94:46.0 95:95.0 97:736.0 100:708.0 101:312.0 102:704.0 103:330.0 105:28.0 107:142.0 108:68.0 109:79.0 110:441.0 112:120.0 113:1185.0 114:477.0 115:352.0 118:388.0 124:29.0 125:28.0 129:122.0 130:214.0 133:437.0 134:3107.0 135:549.0 136:115.0 138:102.0 139:18.0 140:270.0 142:50.0 143:254.0 144:82.0 145:85.0 146:95.0 147:1255.0 153:71.…	4424	5731	6617	3750	4745	2035	5812	5398	7914	9252	5776	4773	3254	6081	7269	2514	4386	6175	3756	4976	1995	3379	2786	2857	9197	4510	6318	7168	6735	3228	19309	4505	12950	7132	4380	13933	5851	4609	5038	8531	12187
506	111255	unidentified compound			884835	103	111255	85 229.0 86 140.0 87 126.0 88 78.0 89 1682.0 90 104.0 92 38.0 93 89.0 94 120.0 95 238.0 96 2269.0 97 260.0 98 344.0 99 143.0 100 234.0 101 549.0 102 170.0 103 7692.0 104 579.0 105 368.0 107 145.0 108 86.0 109 39.0 111 38.0 112 83.0 113 153.0 114 155.0 115 155.0 116 355.0 117 3241.0 118 326.0 119 188.0 120 23.0 122 41.0 123 433.0 124 87.0 128 298.0 129 2374.0 130 312.0 131 628.0 132 105.0 133 1511…	16332	34560	6457	10931	16684	15740	22912	4768	1208	17226	23527	16536	17233	23744	21750	4314	2690	18408	22011	18487	15516	20849	22164	2987	19467	19806	4557	17494	19151	28177	14261	28964	25435	2265	18527	23589	1635	17695	29621	1661	22731
507	110640	unidentified compound			778141	262	110640	85:547.0 86:622.0 88:313.0 89:1571.0 90:228.0 96:411.0 99:433.0 101:1497.0 102:1158.0 103:4549.0 104:470.0 110:214.0 111:281.0 113:381.0 116:900.0 117:4287.0 118:685.0 119:451.0 120:173.0 122:180.0 123:76.0 126:151.0 128:1259.0 129:4243.0 130:1115.0 131:1271.0 132:325.0 133:2816.0 134:582.0 135:379.0 136:125.0 137:84.0 140:51.0 142:1915.0 143:1244.0 144:1832.0 145:553.0 147:10232.0 148:1856.0 149…	7381	3643	6594	2643	3223	2908	7935	2901	4872	3246	3665	2268	3734	8085	8104	2516	2344	3684	3832	6069	2636	2629	4570	2570	6615	9544	5809	2922	3382	7356	3160	3965	2222	3669	5901	12574	3802	10750	7147	5332	3976
508	110628	unidentified compound			469020	144	110628	85:915.0 86:242.0 98:244.0 99:244.0 100:1001.0 101:39.0 102:97.0 111:68.0 112:64.0 113:251.0 114:110.0 115:102.0 118:31.0 126:36.0 128:149.0 129:76.0 130:131.0 131:297.0 132:163.0 133:154.0 138:38.0 139:29.0 144:2853.0 145:322.0 146:55.0 147:952.0 148:84.0 149:214.0 155:132.0 157:78.0 158:65.0 164:13.0 167:27.0 169:40.0 172:35.0 173:74.0 174:42.0 184:18.0 188:2224.0 189:324.0 190:125.0 191:124.0 …	17741	1497	4116	7406	6819	1310	15005	5659	4735	5880	9259	5328	4415	23935	2236	4949	7698	9412	10568	11079	4176	3437	8575	8056	12097	21677	7783	4034	6582	15180	6901	5758	5545	6231	11563	23021	12099	32582	10725	7239	9825
509	110624	unidentified compound			506495	158	110624	85:208.0 86:305.0 88:39.0 89:57.0 90:100.0 94:39.0 95:70.0 96:134.0 97:85.0 98:126.0 99:45.0 100:872.0 101:267.0 102:343.0 105:116.0 112:190.0 113:37.0 114:266.0 116:136.0 117:294.0 118:203.0 119:119.0 122:19.0 124:39.0 128:116.0 130:126.0 131:231.0 132:170.0 133:372.0 135:59.0 141:9.0 142:100.0 144:62.0 145:32.0 149:330.0 150:75.0 151:24.0 152:28.0 153:46.0 154:59.0 156:117.0 158:3650.0 159:556.…	6540	689	1493	1827	2515	2523	4003	1783	529	2967	2337	1696	1659	6125	3199	2501	2338	3950	4369	3440	1663	785	3177	3842	5610	7670	2612	2145	2428	4466	1443	1442	2113	2214	3930	7813	4720	11029	2402	3543	4361
510	110613	unidentified compound			705290	156	110613	85:919.0 86:531.0 88:115.0 90:205.0 91:131.0 93:91.0 94:59.0 95:110.0 96:75.0 98:261.0 99:219.0 100:1990.0 101:165.0 102:381.0 109:153.0 110:66.0 111:177.0 112:396.0 113:409.0 114:552.0 115:1339.0 116:1785.0 117:720.0 118:279.0 119:296.0 125:76.0 126:48.0 127:123.0 128:1113.0 130:398.0 131:2294.0 132:477.0 133:1574.0 134:369.0 135:133.0 139:454.0 140:415.0 141:38.0 142:357.0 144:1158.0 145:298.0 …	14950	1463	4684	5479	5929	7100	3002	6981	4331	7320	10138	5838	8031	26424	6888	5291	4100	8389	7981	8665	3669	5288	8319	7592	6696	18754	4590	4901	7520	11375	5721	7095	8107	7343	11158	13001	7912	26711	7703	7741	10163
511	110612	unidentified compound			715649	172	110612	85:330.0 86:1726.0 87:243.0 88:355.0 94:50.0 96:50.0 98:208.0 99:313.0 100:5409.0 101:653.0 102:1493.0 103:1102.0 109:175.0 110:25.0 111:17.0 112:149.0 113:66.0 114:598.0 115:1470.0 116:2400.0 119:179.0 126:193.0 127:112.0 128:1079.0 129:2249.0 130:738.0 131:1290.0 132:273.0 133:1719.0 134:182.0 135:55.0 137:42.0 140:81.0 141:28.0 142:597.0 143:111.0 144:743.0 145:20.0 146:191.0 147:8879.0 148:12…	8291	1417	2035	1934	3267	3340	5960	3787	2734	3933	3334	2683	2865	7889	3649	2645	2619	4589	4731	5840	2569	3582	3936	4184	5523	9798	2222	2183	5702	5921	3487	3241	3289	2704	4270	5933	5359	8657	5182	6358	4609
512	110611	unidentified compound			575072	117	110611	85:1103.0 86:477.0 88:231.0 92:39.0 96:133.0 97:151.0 98:26.0 99:430.0 100:2892.0 101:1403.0 102:584.0 105:215.0 106:50.0 110:576.0 111:109.0 112:246.0 115:618.0 117:28920.0 118:3148.0 119:1351.0 120:130.0 121:35.0 130:227.0 131:2280.0 132:597.0 133:3359.0 134:392.0 135:363.0 136:27.0 142:183.0 143:298.0 144:82.0 145:123.0 147:20696.0 148:3622.0 149:1919.0 150:132.0 151:134.0 157:1487.0 158:320.0…	52653	7591	10574	13708	11267	8879	14364	8313	6113	8451	6424	11938	12732	41435	15652	8400	7782	15180	14645	13480	10562	10586	13343	13848	26049	54672	16658	13350	22611	21101	23393	21835	13352	15875	20014	33022	16838	53701	23633	18023	7777
513	110607	unidentified compound			521860	274	110607	85:953.0 86:1061.0 87:554.0 88:86.0 89:271.0 90:51.0 91:68.0 92:56.0 94:368.0 95:373.0 96:667.0 97:931.0 98:265.0 99:464.0 100:4433.0 101:690.0 102:501.0 103:1012.0 104:119.0 105:378.0 106:81.0 107:92.0 110:112.0 111:150.0 112:12174.0 113:1024.0 114:348.0 115:858.0 116:266.0 117:1573.0 118:245.0 119:394.0 120:70.0 121:65.0 122:36.0 123:18.0 124:34.0 125:84.0 126:169.0 127:173.0 128:61.0 129:1991.…	24175	1586	4760	4307	5010	4714	15947	4988	3594	5009	6638	4717	4610	21189	7721	5384	4388	6774	7740	8096	3834	3186	6349	5927	12619	23576	5839	3062	7842	11582	6439	4513	4426	6203	8593	15854	9228	23429	7728	6084	5656
514	110606	unidentified compound			496937	98	110606	85:1173.0 86:1441.0 87:494.0 88:102.0 89:60.0 91:132.0 92:28.0 93:35.0 96:77.0 97:265.0 98:27968.0 99:1976.0 100:11006.0 101:1262.0 102:94.0 103:601.0 105:292.0 106:22.0 107:47.0 110:146.0 112:170.0 113:557.0 114:73.0 115:471.0 116:58.0 117:1031.0 118:250.0 119:343.0 120:21.0 121:37.0 126:91.0 127:48.0 128:3452.0 129:493.0 130:114.0 131:2514.0 132:660.0 133:3354.0 134:470.0 135:256.0 136:16.0 137…	73446	4965	10064	18474	14587	11510	40284	14839	11116	14554	15700	11931	14793	37331	19150	12886	15285	20465	22195	25921	12546	11316	17668	16718	33055	71768	13765	10848	25086	30818	19506	14936	15293	13320	23629	45895	23684	53615	19390	17138	15424
515	110501	unidentified compound			760155	103	110501	87 63.0 88 156.0 89 584.0 92 22.0 94 62.0 95 331.0 99 161.0 101 498.0 103 5482.0 105 262.0 106 128.0 107 675.0 110 34.0 111 33.0 112 105.0 113 159.0 114 129.0 115 93.0 116 374.0 117 1818.0 118 220.0 119 217.0 121 23.0 122 50.0 124 39.0 125 96.0 126 120.0 128 187.0 129 716.0 130 106.0 131 513.0 132 240.0 133 997.0 135 290.0 138 61.0 139 110.0 140 86.0 141 12.0 142 360.0 143 253.0 144 48.0 145 95.0…	10515	17692	7934	7860	11759	12637	22712	13864	13298	14446	16727	15425	15830	13840	18703	11013	12900	18188	19965	22655	10207	13232	16294	18033	18759	16801	21357	15521	16886	20742	17581	19785	17830	16318	16777	26775	17896	16240	2537	19721	16599
516	109997	unidentified compound			618393	103	109997	85 119.0 86 349.0 89 1222.0 90 76.0 100 280.0 101 104.0 102 80.0 103 8158.0 104 549.0 105 491.0 113 394.0 117 683.0 127 257.0 129 550.0 131 291.0 133 885.0 134 123.0 145 60.0 147 2913.0 148 202.0 149 135.0 157 92.0 163 81.0 189 357.0 190 58.0 191 44.0 205 161.0 206 30.0 217 2269.0 218 360.0 219 114.0 230 32.0 231 47.0 232 13.0 233 18.0 241 13.0 256 12.0 257 24.0 267 12.0 277 101.0 287 18.0 307 43…	12163	85548	36328	12779	17219	17616	15215	31957	19799	27132	32018	21247	12788	9959	68384	14127	16401	25183	27945	37985	23830	28185	20874	25412	15927	11504	71322	21776	25188	26907	40732	40031	25589	17964	28657	23317	22953	10006	79695	28176	38371
517	109386	unidentified compound			542775	204	109386	85:154.0 86:147.0 89:833.0 91:127.0 94:33.0 95:40.0 98:183.0 99:112.0 100:268.0 101:919.0 102:125.0 103:4123.0 104:411.0 105:159.0 110:296.0 113:77.0 114:97.0 115:131.0 116:352.0 117:3335.0 118:304.0 119:258.0 129:917.0 130:319.0 131:918.0 132:80.0 133:1729.0 134:292.0 144:52.0 147:5348.0 148:1055.0 149:274.0 151:36.0 157:297.0 158:223.0 159:40.0 163:57.0 168:35.0 172:786.0 173:181.0 175:93.0 177…	1168	5853	19538	2957	2746	2799	2412	2261	2150	2988	3249	2896	3773	690	2799	189	2936	1044	2825	3895	4507	3095	3440	3556	2284	559	3873	3219	3066	3886	3211	3264	2872	3420	3653	3221	2930	437	4361	3342	3434
518	108145	unidentified compound			438056	191	108145	86:20.0 88:60.0 89:73.0 91:76.0 92:34.0 99:27.0 101:78.0 102:88.0 103:859.0 104:48.0 105:96.0 106:32.0 108:31.0 110:766.0 113:49.0 114:47.0 115:232.0 116:350.0 117:127.0 118:216.0 119:50.0 120:62.0 126:31.0 127:53.0 130:179.0 131:234.0 132:41.0 133:224.0 134:704.0 135:69.0 136:62.0 137:33.0 140:104.0 141:27.0 142:24.0 143:47.0 144:106.0 145:18.0 147:2548.0 148:405.0 149:149.0 150:19.0 151:118.0 1…	843	1043	561	599	696	801	586	722	889	910	718	891	772	970	692	1023	776	1013	863	1539	893	1422	1676	1922	1146	1661	1348	1545	1366	893	1555	1869	1577	1736	1544	1944	1735	2012	2170	1862	1877
519	106936	unidentified compound			238992	244	106936	89:281.0 90:73.0 91:107.0 94:27.0 96:263.0 97:321.0 98:50.0 100:123.0 103:295.0 104:168.0 105:568.0 106:201.0 107:219.0 115:502.0 116:128.0 117:135.0 119:277.0 120:233.0 121:220.0 124:360.0 126:387.0 133:1266.0 134:130.0 135:434.0 136:99.0 137:370.0 138:21.0 147:304.0 149:328.0 151:3191.0 152:1361.0 153:386.0 154:35.0 155:71.0 163:41.0 174:105.0 176:31.0 177:122.0 178:243.0 179:98.0 193:51.0 194:…	11344	17046	5585	10364	13817	13708	10064	10533	10079	11362	12760	12418	13957	14555	13525	13897	11846	11856	12717	13663	12229	13894	15433	13382	11681	11693	13816	13109	11282	14113	10538	11436	12100	12498	15669	14438	12164	13964	15999	13319	13897
520	106629	unidentified compound			967520	112	106629	85:349.0 86:1347.0 87:119.0 90:9.0 91:27.0 92:4.0 93:167.0 94:111.0 95:1069.0 96:633.0 97:1328.0 98:1177.0 99:220.0 100:708.0 101:170.0 107:120.0 108:26.0 109:447.0 110:339.0 111:570.0 112:1212.0 113:282.0 114:824.0 115:253.0 116:4.0 121:158.0 122:60.0 123:309.0 124:141.0 125:286.0 126:1621.0 127:125.0 128:547.0 133:2.0 134:64.0 135:158.0 136:85.0 137:180.0 138:96.0 139:46.0 140:275.0 141:23.0 14…	377	392	431	447	305	307	425	275	223	360	331	339	361	413	365	678	487	674	251	490	634	543	393	475	333	449	450	467	266	627	302	597	733	375	322	547	515	469	477	411	334
521	105554	unidentified compound			808218	204	105554	85:205.0 87:127.0 95:29.0 99:147.0 100:54.0 101:330.0 102:135.0 103:1748.0 111:114.0 113:108.0 114:49.0 115:140.0 116:222.0 117:793.0 118:158.0 119:94.0 121:38.0 123:37.0 129:806.0 130:89.0 131:661.0 132:76.0 133:430.0 140:52.0 142:51.0 143:657.0 144:75.0 145:107.0 147:2613.0 148:429.0 152:41.0 153:39.0 155:50.0 157:69.0 158:45.0 159:808.0 160:142.0 161:84.0 162:55.0 163:35.0 165:58.0 169:157.0 1…	9082	2750	9085	3619	3636	2813	11361	3952	3056	4312	5151	3024	3742	8314	424	3245	3489	4572	4736	5511	3962	634	5644	4470	6647	5639	6201	4588	6743	7618	5595	4293	5576	4710	5941	11634	4325	10812	7372	6230	6378
522	104312	unidentified compound			1171921	204	104312	89:102.0 92:34.0 101:281.0 102:34.0 103:657.0 104:65.0 106:124.0 115:46.0 116:162.0 117:294.0 120:9.0 129:1317.0 130:176.0 131:291.0 133:167.0 134:90.0 143:94.0 147:1208.0 148:169.0 149:161.0 153:14.0 163:56.0 168:47.0 169:179.0 170:37.0 177:51.0 188:32.0 189:144.0 190:47.0 191:158.0 192:23.0 204:3654.0 205:673.0 206:269.0 210:34.0 217:791.0 218:171.0 219:37.0 243:34.0 258:31.0 262:17.0 271:57.0 …	1070	346	415	2207	3428	2521	1739	619	967	1607	2890	730	1749	1698	392	558	1725	1929	1405	1121	977	679	1364	1639	932	957	333	1452	2347	1008	1188	1539	1024	1412	866	916	3931	1069	288	339	406
523	103871	unidentified compound			465225	142	103871	91 31.0 93 65.0 94 652.0 95 82.0 96 55.0 98 261.0 100 183.0 110 50.0 112 97.0 113 189.0 114 1287.0 125 18.0 126 136.0 139 15.0 141 1674.0 142 15225.0 143 897.0 156 41.0 170 78.0 195 23.0 201 30.0 202 18.0 213 19.0 240 22.0 277 27.0 285 20.0 293 16.0 294 17.0 295 23.0 315 32.0 316 23.0 322 43.0 326 25.0 328 17.0 331 14.0 333 21.0 382 22.0 398 16.0 423 38.0 489 16.0 497 14.0	1680	1916	384	1174	1634	1383	1856	2036	2191	1899	2483	2329	2003	2678	2246	2449	1650	2381	2398	3456	2352	2500	2891	2726	2492	2934	3088	2659	3051	3557	3063	3230	3376	3037	3150	4407	3021	3552	4132	3880	4065
524	101732	unidentified compound			196225	125	101732	86 87.0 91 1548.0 93 929.0 94 254.0 95 3550.0 96 654.0 97 13099.0 98 551.0 99 179.0 103 115.0 105 329.0 106 135.0 107 370.0 109 1127.0 110 1354.0 112 5187.0 113 510.0 122 62.0 123 111.0 124 355.0 125 11117.0 126 977.0 137 115.0 142 38.0 144 37.0 152 24.0 153 10.0 161 24.0 164 47.0 168 1933.0 169 307.0 171 37.0 172 31.0 193 35.0 199 82.0 202 7.0 223 29.0 228 17.0 234 7.0 237 13.0 240 10.0 260 25.0…	na	na	na	na	na	na	na	na	na	na	na	na	na	na	na	na	na	na	na	na	na	na	na	na	na	na	na	na	na	na	na	na	na	na	na	na	na	na	na	na	na
525	97332	unidentified compound			897169	204	97332	86:125.0 87:56.0 88:100.0 89:760.0 90:60.0 92:92.0 93:144.0 95:156.0 97:42.0 99:50.0 100:56.0 101:566.0 103:1919.0 105:75.0 107:109.0 108:56.0 110:37.0 111:76.0 114:781.0 115:345.0 116:488.0 117:1046.0 118:112.0 119:413.0 120:97.0 122:29.0 127:94.0 128:65.0 129:1626.0 130:235.0 131:537.0 133:922.0 135:113.0 136:32.0 138:35.0 141:73.0 142:66.0 143:316.0 144:89.0 145:3092.0 146:422.0 147:3664.0 148…	15529	4118	10972	5403	5682	3164	18600	5557	5123	6805	10936	4345	4411	16007	17494	4110	4998	11639	7724	7717	7202	4011	9453	5457	13698	21258	13527	3749	7839	13187	7140	10313	9645	6474	8901	22258	7600	27448	15519	10882	6490
526	96539	unidentified compound			721995	156	96539	91:74.0 98:79.0 99:111.0 100:360.0 101:68.0 102:83.0 109:367.0 113:156.0 115:389.0 116:229.0 117:377.0 126:297.0 128:495.0 129:110.0 131:744.0 133:861.0 135:67.0 139:60.0 140:167.0 142:104.0 147:4880.0 148:454.0 149:477.0 151:69.0 155:162.0 156:4195.0 157:575.0 158:48.0 163:65.0 172:159.0 173:40.0 174:233.0 175:57.0 182:24.0 188:96.0 190:273.0 191:88.0 199:267.0 203:1579.0 204:113.0 205:90.0 206:…	32483	1763	7545	7176	6216	6359	11561	7089	5132	7523	8560	6097	9510	29013	8458	4814	4547	7771	7996	9094	4206	5697	9619	7483	11473	34849	6062	5820	9509	11690	7566	7899	9094	7466	10810	20965	8435	32794	746	9619	7770
527	94170	unidentified compound			683422	229	94170	86:269.0 89:168.0 90:24.0 91:10.0 97:12.0 98:147.0 100:422.0 101:66.0 102:201.0 103:129.0 104:44.0 106:1.0 107:1.0 110:6.0 111:157.0 115:209.0 116:33.0 124:1.0 126:1.0 128:2.0 130:394.0 131:73.0 133:226.0 140:1.0 144:1.0 145:69.0 146:21.0 154:30.0 155:405.0 156:116.0 157:197.0 159:1.0 162:1.0 163:2.0 171:133.0 173:439.0 174:309.0 177:29.0 182:19.0 186:3.0 189:20.0 190:23.0 200:1.0 201:1654.0 202:…	1849	1349	1548	963	1515	1332	88510	1348	1420	1954	2078	2081	2462	2688	2265	1712	1762	2256	2229	2982	663	1657	1681	1980	2360	3034	2890	1545	1604	2606	1199	2473	2556	2323	1585	4590	2311	3212	2229	1955	2086
528	93947	unidentified compound			479860	202	93947	85:175.0 86:288.0 87:170.0 89:101.0 91:17.0 92:10.0 98:40.0 99:117.0 100:1710.0 101:272.0 102:204.0 103:169.0 105:16.0 106:33.0 113:8.0 115:69.0 117:315.0 119:115.0 122:13.0 123:22.0 124:11.0 128:5.0 130:184.0 131:678.0 132:254.0 133:537.0 134:50.0 135:75.0 140:2.0 142:19.0 144:97.0 145:18.0 146:184.0 147:7794.0 148:1209.0 149:587.0 150:78.0 151:31.0 157:7.0 158:485.0 160:79.0 162:21.0 166:7.0 16…	2493	4110	1016	1450	1226	1247	1925	1468	1512	1730	2718	1933	1996	1769	1834	1438	1523	2680	2385	2570	2392	2483	1712	2469	1699	2923	2572	2681	4550	2669	3078	3152	2322	2468	3088	4625	2867	2958	3970	3165	3815
529	93385	unidentified compound			444805	215	93385	85:237.0 86:118.0 90:1.0 91:157.0 93:179.0 94:27.0 95:215.0 96:8.0 98:41.0 100:324.0 101:21.0 102:566.0 103:13.0 106:21.0 107:138.0 108:73.0 109:1037.0 110:46.0 111:1.0 112:18.0 114:400.0 116:18.0 117:598.0 119:17.0 120:28.0 121:40.0 122:50.0 127:326.0 128:112.0 130:159.0 131:78.0 136:1.0 138:9.0 140:6.0 141:340.0 142:112.0 143:616.0 144:17.0 147:227.0 150:32.0 152:32.0 156:27.0 157:45.0 158:796.…	1967	1950	142	537	1276	858	728	1251	1110	1252	1225	1285	1103	1158	1028	866	1359	1499	1525	2096	949	2332	1412	1672	861	2001	1501	1429	2760	1473	1155	1315	1207	1270	1340	1946	1235	1541	1364	1369	1945
530	88841	unidentified compound			198886	125	88841	85 1197.0 88 233.0 91 6962.0 92 663.0 93 3674.0 94 1168.0 95 15333.0 96 1589.0 97 29123.0 99 103.0 101 334.0 103 402.0 104 281.0 105 1208.0 106 228.0 107 1707.0 108 249.0 109 6381.0 110 8968.0 111 12328.0 112 12509.0 113 1706.0 114 889.0 118 416.0 119 10.0 120 36.0 121 185.0 122 184.0 123 682.0 124 2378.0 125 72117.0 126 7035.0 127 995.0 128 698.0 130 248.0 132 128.0 134 2617.0 135 206.0 136 6.0 …	na	na	na	na	na	na	na	na	na	na	na	na	na	na	na	na	na	na	na	na	na	na	na	na	na	na	na	na	na	na	na	na	na	na	na	na	na	na	na	na	na
531	87822	unidentified compound			700035	160	87822	85:206.0 86:482.0 87:460.0 88:409.0 89:4155.0 90:252.0 91:183.0 96:101.0 97:99.0 98:197.0 99:442.0 100:741.0 101:1118.0 102:470.0 103:5831.0 104:407.0 105:2036.0 106:167.0 107:110.0 108:29.0 110:133.0 111:276.0 112:76.0 113:241.0 114:843.0 115:486.0 116:136.0 117:2252.0 118:359.0 119:359.0 120:49.0 124:14.0 127:311.0 128:285.0 129:1612.0 130:552.0 131:605.0 133:2644.0 134:532.0 135:82.0 138:84.0 …	4505	6223	2551	2637	3557	4917	11561	3224	4071	4410	5710	5351	5511	4547	7347	5657	3178	3815	6517	5101	2678	4777	5072	5490	7896	3755	5633	6799	4181	5462	2970	7571	4636	4036	6382	9375	3279	3515	8258	8197	4887
532	87769	unidentified compound			578572	186	87769	87:28.0 88:33.0 89:37.0 96:3017.0 97:326.0 98:13.0 99:86.0 100:114.0 101:343.0 102:461.0 106:19.0 107:32.0 110:39.0 116:442.0 122:9.0 128:227.0 129:306.0 131:96.0 133:81.0 142:667.0 143:229.0 144:87.0 145:63.0 150:20.0 156:463.0 158:815.0 170:311.0 173:221.0 174:48.0 186:2799.0 187:253.0 213:33.0 216:22.0 217:30.0 228:13.0 229:26.0 245:21.0 260:40.0 287:14.0 288:275.0 432:27.0 441:14.0 449:13.0 4…	1222	1080	342	713	646	996	1307	1512	979	873	936	991	771	1411	1551	620	1197	1496	1525	1253	1080	1227	1470	1997	1085	1484	768	1228	1646	1818	1537	1922	1505	1428	2878	1962	1747	1986	1757	1967	1789
533	87756	unidentified compound			243063	91	87756	87:3263.0 88:356.0 89:1339.0 90:189.0 91:7776.0 92:366.0 93:318.0 98:71.0 99:276.0 101:670.0 103:4584.0 104:260.0 105:470.0 110:36.0 112:43.0 113:48.0 116:8757.0 117:2503.0 118:617.0 119:762.0 121:31.0 122:18.0 129:140.0 131:363.0 145:40.0 148:584.0 151:36.0 158:51.0 168:18.0 172:58.0 177:251.0 178:35.0 182:20.0 187:22.0 188:244.0 189:36.0 192:42.0 193:88.0 196:21.0 202:42.0 203:32.0 208:20.0 226…	21463	31353	19263	15192	17407	21231	22361	24290	18734	24434	29084	23007	23627	29469	25702	40787	16218	23293	30969	34668	22625	33687	29789	37112	15838	30997	29444	22138	18172	39687	24718	41020	33579	28938	36057	28625	23535	36907	50251	36558	43790
534	62263	unidentified compound			753486	369	62263	86:9643.0 87:2400.0 88:647.0 89:2156.0 96:680.0 98:1303.0 99:1778.0 100:56410.0 101:5601.0 102:3058.0 105:680.0 107:32.0 110:1050.0 111:2227.0 114:2333.0 115:1581.0 116:2027.0 119:413.0 120:259.0 122:24.0 123:532.0 124:561.0 125:901.0 126:1163.0 127:3503.0 128:1443.0 130:2703.0 131:14329.0 132:4433.0 133:8151.0 134:1266.0 135:90.0 136:23.0 139:546.0 140:530.0 141:3882.0 142:1529.0 143:297.0 144:1…	287	386	557	361	456	577	369	371	528	170	634	435	594	453	652	415	484	599	669	671	521	238	454	477	648	346	666	431	566	639	541	517	388	417	667	641	255	371	638	695	344
535	48608	unidentified compound			418870	160	48608	86:76.0 94:5.0 100:514.0 101:75.0 103:32.0 116:1619.0 119:8.0 133:154.0 137:18.0 144:135.0 147:696.0 148:96.0 149:23.0 160:1163.0 161:104.0 162:43.0 165:105.0 190:208.0 192:32.0 204:22.0 233:3.0 234:41.0 261:2.0 262:180.0 263:23.0 291:6.0	6981	465	2388	2564	2090	2543	2691	1723	1273	2619	3113	2821	2687	12991	5934	2919	2372	2554	2838	4721	2755	1287	4528	2823	6561	8560	4897	2971	1921	6839	3004	3169	1882	4596	5788	10735	4596	17515	7106	4093	6146
536	46362	unidentified compound			429380	229	46362	85:448.0 86:502.0 87:32.0 100:246.0 101:103.0 103:24.0 111:13.0 112:1.0 144:27.0 147:190.0 160:30.0 185:10.0 190:3.0 229:288.0 231:22.0 232:12.0 244:42.0 245:21.0 246:12.0 283:3.0 423:9.0 425:4.0 440:1.0 446:9.0 458:12.0 469:6.0	5215	5584	3443	4385	2711	1530	1750	3646	4833	4947	4387	5500	5783	5908	5617	4649	5026	5473	2920	3062	5906	4334	6423	4937	3976	4456	2924	4551	5404	7338	6449	6898	6214	4793	6882	3896	3261	5519	6998	5301	4239
537	46307	unidentified compound			296920	199	46307	94:49.0 98:123.0 113:99.0 168:18.0 199:556.0 222:9.0 225:7.0 243:27.0	621	965	1032	2452	3201	2918	3742	2459	3368	3016	2740	3495	2831	3130	3627	1957	3543	3135	2973	4087	3803	916	3131	2572	3525	1107	4523	4616	1092	3155	4454	3982	3618	3606	4360	6518	4818	4715	3416	4378	2578
538	45378	unidentified compound			281781	140	45378	85:3004.0 86:89.0 88:322.0 89:370.0 90:2591.0 91:700.0 92:96.0 94:7.0 97:771.0 101:31.0 103:258.0 104:302.0 105:49.0 106:178.0 107:909.0 108:1.0 109:126.0 110:2024.0 112:518.0 114:70.0 116:104.0 117:1305.0 118:704.0 119:607.0 120:135.0 121:7.0 122:3.0 126:6.0 127:468.0 129:179.0 132:108.0 133:19.0 134:3302.0 135:679.0 136:170.0 138:1.0 139:1.0 140:13024.0 141:584.0 143:142.0 144:175.0 145:578.0 1…	5582	5817	2847	1891	1939	2043	2769	2029	3173	1356	1504	1229	743	2617	2488	1687	2063	2595	1546	1773	1543	5529	1541	1841	1826	6036	1857	2336	6271	2380	2496	1880	1480	1796	1596	2363	2126	1483	1479	2644	1566
539	43763	unidentified compound			270573	218	43763	85:976.0 87:1665.0 89:608.0 90:553.0 91:204.0 92:306.0 93:269.0 94:2.0 95:229.0 99:1019.0 100:6299.0 101:1329.0 102:1020.0 104:351.0 105:260.0 106:258.0 107:1200.0 109:203.0 110:2529.0 111:766.0 112:62.0 113:365.0 114:1040.0 115:382.0 116:42.0 117:840.0 118:550.0 119:7881.0 120:1138.0 121:2531.0 122:475.0 123:666.0 125:20.0 126:286.0 127:1029.0 128:537.0 129:163.0 131:3194.0 132:92.0 133:449.0 13…	4288	3736	2129	3414	2846	2439	2083	2738	1363	3365	3605	3408	3016	4025	3131	3133	2207	2877	4147	4599	2295	4328	3302	3358	2194	4234	2812	2995	3433	3146	3328	3181	3379	3524	3053	4070	3835	3449	3387	3395	3492
540	43100	unidentified compound			414838	88	43100	85:149.0 86:1899.0 87:729.0 88:26309.0 89:988.0 90:1129.0 91:1033.0 92:209.0 94:1.0 95:79.0 96:1.0 98:7.0 99:1.0 100:377.0 103:1097.0 105:66.0 106:8.0 109:35.0 110:466.0 112:27.0 113:13.0 114:207.0 115:1.0 116:382.0 117:532.0 118:53.0 120:168.0 124:1.0 125:5.0 128:1.0 129:270.0 130:1405.0 132:38.0 140:2.0 141:6.0 143:128.0 144:981.0 145:919.0 146:299.0 151:36.0 153:3.0 154:2.0 158:45.0 159:1.0 16…	1072	679	1399	1127	1576	3441	2946	2957	2110	1838	2119	2194	1650	4164	1468	3478	2191	2474	2185	3038	2033	950	3576	1696	3089	1326	1482	1866	710	1183	1184	1849	1945	1744	2024	1897	1164	3575	1700	1757	2974
541	42357	unidentified compound			701804	116	42357	86:39.0 87:1459.0 88:2030.0 89:985.0 100:256.0 101:3713.0 102:171.0 103:5790.0 104:131.0 105:189.0 106:88.0 107:104.0 108:288.0 110:83.0 112:98.0 114:36.0 115:85.0 116:7137.0 117:14047.0 118:1709.0 119:806.0 133:244.0 142:1.0 145:314.0 147:1682.0 148:212.0 158:22.0 159:8.0 161:1930.0 162:222.0 163:55.0 170:41.0 175:7.0 180:31.0 184:106.0 191:447.0 196:20.0 205:65.0 212:7.0 231:78.0 235:122.0 238:…	2059	4120	1715	2676	2327	4033	8989	1418	1691	1087	1162	1042	1869	1548	1070	768	1432	1770	1603	1567	1153	2346	2046	547	4852	1590	3233	1591	1979	1855	1302	2556	1121	2380	2922	5239	1891	2001	919	2106	1411
542	42187	unidentified compound			243240	187	42187	87:83.0 88:14.0 89:1292.0 90:128.0 91:88.0 92:533.0 93:434.0 99:19.0 101:139.0 102:113.0 103:5632.0 104:701.0 105:51.0 109:32.0 110:507.0 111:185.0 112:288.0 114:112.0 115:478.0 117:499.0 118:48.0 119:469.0 120:29.0 122:14.0 123:25.0 130:1625.0 132:262.0 133:76.0 134:1562.0 143:709.0 144:90.0 146:920.0 151:9.0 157:41.0 160:35.0 163:3.0 170:23.0 184:103.0 187:2401.0 188:403.0 189:65.0 191:216.0 19…	3948	4388	4312	3345	3685	3618	2998	2687	3175	3027	3234	3299	3293	3818	4794	2953	2861	3061	3257	4141	2992	3173	4081	3285	3454	3404	3715	3245	2720	3599	3100	3746	3683	3581	3889	3743	3730	3672	3990	3500	3771
543	42003	unidentified compound			714710	179	42003	85 71.0 89 140.0 92 69.0 93 133.0 94 205.0 95 242.0 98 396.0 99 101.0 100 184.0 106 110.0 107 488.0 109 50.0 110 339.0 111 61.0 112 60.0 115 23.0 122 26.0 129 1217.0 130 449.0 131 111.0 132 1778.0 141 32.0 142 2.0 143 163.0 145 252.0 151 17.0 152 27.0 154 20.0 155 10.0 168 17.0 171 203.0 178 33.0 179 5818.0 180 641.0 185 131.0 196 20.0 197 63.0 199 85.0 201 117.0 206 327.0 208 31.0 209 41.0 211 3…	6235	1873	1887	2881	3672	3699	3333	3347	2940	3464	4041	2580	3497	6380	3311	3929	3388	4424	4061	5363	3054	3573	4403	4043	4999	7281	3031	3615	4218	5307	4088	3853	3758	3562	4366	6675	3688	6929	3412	4713	5710
544	41836	unidentified compound			411774	240	41836	85:6.0 86:326.0 87:250.0 88:2.0 89:2.0 90:45.0 91:329.0 99:2.0 100:537.0 101:343.0 105:1.0 106:7.0 107:173.0 108:38.0 110:19.0 111:48.0 112:83.0 113:168.0 128:99.0 132:24.0 134:543.0 136:261.0 140:359.0 143:116.0 144:90.0 145:1.0 146:214.0 148:5.0 149:2.0 151:26.0 152:8.0 153:87.0 155:20.0 161:1.0 163:1.0 165:55.0 166:19.0 167:74.0 168:346.0 169:27.0 174:53.0 176:1.0 181:131.0 182:167.0 184:352.0…	1502	1369	704	1047	1083	1198	1267	976	703	981	1092	1335	1159	1108	1168	935	933	991	1238	1654	1687	1969	1239	1142	1460	1462	1222	1693	1841	2040	1967	1406	1095	918	1452	2886	1782	1800	1811	1942	2225
545	41796	unidentified compound			400197	158	41796	85:1496.0 87:109.0 88:68.0 91:69.0 92:57.0 99:77.0 100:3986.0 101:144.0 102:2484.0 103:506.0 104:151.0 105:115.0 107:161.0 110:75.0 112:158.0 113:982.0 117:287.0 118:569.0 119:100.0 129:205.0 130:397.0 131:385.0 132:175.0 142:69.0 143:103.0 144:40.0 154:18.0 156:23.0 157:599.0 158:4632.0 159:801.0 160:197.0 161:39.0 165:36.0 171:20.0 173:614.0 174:181.0 175:40.0 200:29.0 202:1133.0 203:141.0 204:…	1044	1025	717	721	1097	1164	1026	1596	1586	1713	2009	1929	1529	1747	1394	1504	1517	2111	1783	874	1733	1876	2498	2563	796	1885	2591	2634	2457	1437	2773	3487	2846	2814	3242	2136	3721	1374	3282	3480	4048
546	41788	unidentified compound			870370	290	41788	85:129.0 87:105.0 88:220.0 91:110.0 94:45.0 95:76.0 97:496.0 98:742.0 99:119.0 100:258.0 101:330.0 102:110.0 103:3690.0 104:207.0 107:83.0 111:23.0 112:118.0 113:39.0 115:245.0 116:1080.0 117:866.0 118:35.0 119:223.0 125:47.0 128:151.0 130:277.0 131:544.0 133:1406.0 134:287.0 135:182.0 142:53.0 144:962.0 145:77.0 147:4256.0 148:1323.0 149:1286.0 150:173.0 151:136.0 153:50.0 158:534.0 159:143.0 16…	2283	3133	339	1090	2526	3558	1143	3445	2047	3273	3510	2737	2217	3771	2156	4657	2159	2787	3086	3696	2393	3161	3447	3711	2104	2686	4134	2223	2677	4829	2413	5992	4253	2524	3315	5923	3445	4145	7438	2743	5425
547	41750	unidentified compound			638078	144	41750	85:305.0 87:862.0 90:669.0 92:162.0 95:124.0 96:232.0 97:94.0 99:844.0 100:1454.0 102:1080.0 104:1340.0 105:1861.0 106:449.0 108:163.0 110:481.0 111:183.0 113:243.0 117:2437.0 118:711.0 121:87.0 123:60.0 124:51.0 125:157.0 126:305.0 127:465.0 128:1600.0 129:5058.0 130:1339.0 131:1094.0 132:594.0 133:2861.0 134:670.0 135:340.0 136:58.0 137:105.0 138:75.0 139:76.0 140:520.0 141:210.0 142:121.0 143:…	2311	5313	1135	1211	1304	1579	4507	2276	1701	2568	2045	1880	899	1899	3903	2464	2163	2691	2537	3552	2423	2751	2797	2969	4358	2718	6147	2685	3461	6279	2533	3232	2824	2539	3679	3933	4382	3903	8514	6270	3222
548	41708	unidentified compound			685076	301	41708	86:94.0 93:113.0 95:93.0 102:123.0 104:83.0 111:115.0 112:150.0 127:153.0 128:80.0 131:323.0 132:83.0 135:92.0 139:71.0 140:23.0 144:18.0 150:91.0 153:18.0 154:87.0 155:201.0 156:104.0 158:45.0 167:68.0 168:27.0 169:143.0 172:52.0 176:42.0 179:38.0 182:41.0 183:2085.0 184:535.0 185:186.0 186:42.0 187:37.0 188:34.0 195:47.0 202:430.0 203:77.0 211:31.0 212:28.0 213:36.0 214:27.0 221:80.0 230:29.0 2…	2811	3308	446	1728	3248	2410	2044	4763	2751	3724	6098	4643	4331	6043	3991	3994	3076	5471	5977	7999	3750	4496	6746	6536	3016	5316	5767	6391	4771	7864	5553	5653	7568	5257	8692	11174	6641	8525	7565	7221	9073
549	41699	unidentified compound			363710	132	41699	86:675.0 87:141.0 88:171.0 89:128.0 90:79.0 91:267.0 98:55.0 100:512.0 101:96.0 102:600.0 103:2110.0 104:3084.0 105:237.0 106:112.0 113:974.0 114:156.0 116:1174.0 117:935.0 118:146.0 119:438.0 120:89.0 123:18.0 124:36.0 130:1075.0 131:1820.0 132:8339.0 133:827.0 134:233.0 139:35.0 140:69.0 142:36.0 144:29.0 150:32.0 152:36.0 153:41.0 154:20.0 158:40.0 159:437.0 160:1047.0 161:184.0 162:82.0 164:4…	8719	8857	39420	4533	7213	5837	8185	9382	5326	7104	9509	3850	6624	6645	6393	7986	6156	7714	9688	9568	6885	11854	9648	11084	8749	7249	8083	7718	12198	10323	9100	10440	8960	8840	10542	11221	9561	10898	10767	9872	10870
550	41697	unidentified compound			524969	185	41697	85:305.0 86:544.0 87:311.0 88:72.0 89:125.0 91:94.0 92:106.0 93:109.0 94:31.0 95:622.0 96:104.0 98:903.0 100:1693.0 101:454.0 102:705.0 103:492.0 105:150.0 108:113.0 111:72.0 112:55.0 113:2206.0 114:517.0 115:330.0 117:211.0 119:133.0 122:31.0 123:60.0 124:26.0 125:436.0 126:106.0 127:92.0 129:131.0 133:593.0 135:73.0 138:28.0 139:73.0 140:87.0 141:4458.0 142:697.0 143:212.0 145:105.0 146:88.0 14…	4243	3638	247	2251	3337	3590	3107	4931	3510	4007	3718	3464	3601	5943	3671	3374	3838	4473	4439	5802	4655	5388	5947	4493	3202	6482	6251	5536	6401	7062	6853	6999	5153	6528	7861	10369	6490	6144	7715	5731	9399
551	41691	unidentified compound			600208	273	41691	85:220.0 86:854.0 87:453.0 88:257.0 89:631.0 90:194.0 91:40.0 92:77.0 96:228.0 98:157.0 99:461.0 100:352.0 101:293.0 102:262.0 103:811.0 106:41.0 110:71.0 112:134.0 113:171.0 115:415.0 117:1017.0 118:299.0 119:228.0 121:67.0 124:71.0 126:288.0 127:385.0 129:147.0 130:5777.0 131:998.0 132:258.0 133:377.0 134:252.0 137:40.0 138:66.0 141:278.0 142:164.0 146:443.0 147:5610.0 148:937.0 149:234.0 153:8…	14000	10567	7711	6244	6669	8620	10184	10877	1383	9023	10744	11615	11310	11165	6848	8235	2377	9491	10656	12197	7684	13178	10237	12179	10706	13288	9502	11122	11519	12559	10405	12543	12814	9942	11673	17368	11040	10827	11575	14302	14112
208	41682	unidentified compound			605091	144	41682	85:286.0 86:660.0 87:664.0 88:173.0 89:6304.0 90:503.0 91:414.0 93:23.0 94:238.0 96:128.0 98:241.0 99:576.0 100:3879.0 101:1028.0 102:777.0 103:7555.0 104:658.0 105:225.0 106:38.0 107:59.0 108:76.0 109:219.0 110:382.0 111:379.0 112:353.0 113:306.0 114:110.0 115:447.0 116:776.0 117:1908.0 119:478.0 120:217.0 121:90.0 122:130.0 124:63.0 126:401.0 127:310.0 128:1045.0 129:6225.0 130:774.0 131:1936.0…	3390	1745	984	1452	428	1461	3493	1881	385	2019	1519	1555	159	2324	653	1567	621	2312	1557	1952	929	1528	1840	1094	2504	2963	741	1810	1820	2544	2550	1313	1918	1699	2309	3919	974	670	2502	800	2018
552	32247	unidentified compound			253754	245	32247	85:590.0 86:265.0 87:27.0 88:35.0 89:14.0 91:283.0 92:223.0 93:28.0 95:59.0 96:64.0 99:959.0 100:1001.0 105:175.0 106:20.0 107:1302.0 108:229.0 109:161.0 110:490.0 111:40.0 112:53.0 113:131.0 114:201.0 115:3650.0 116:1533.0 117:384.0 118:361.0 119:329.0 120:65.0 124:1.0 125:11.0 126:146.0 128:208.0 129:91.0 130:1184.0 132:374.0 134:607.0 136:95.0 137:2.0 139:249.0 140:32.0 141:178.0 142:158.0 143…	1476	1367	891	987	1407	1454	1502	2049	1777	1373	3265	1079	901	2916	1692	1016	1917	3980	3752	3046	1364	1403	2534	2283	2156	2012	2176	2025	2679	3197	2038	1793	1261	1565	3275	5023	2381	2662	2574	2204	3644
553	31408	unidentified compound			424066	85	31408	85:7770.0 86:402.0 89:20.0 90:37.0 91:23.0 93:18.0 96:80.0 97:401.0 98:721.0 99:1470.0 100:163.0 101:35.0 102:25.0 105:30.0 108:20.0 109:25.0 110:22.0 111:82.0 112:424.0 113:525.0 114:52.0 118:10.0 119:25.0 122:20.0 125:80.0 126:298.0 127:373.0 128:62.0 132:23.0 136:27.0 137:32.0 139:29.0 140:225.0 141:156.0 142:49.0 143:18.0 144:17.0 146:16.0 151:15.0 154:58.0 155:132.0 156:22.0 157:21.0 158:29.…	41754	20155	19038	9430	9778	11970	11837	13100	10839	16379	18583	12389	11501	30262	23045	12960	16123	12168	16612	15432	20402	12688	13273	13209	14474	28037	17924	11439	13043	12692	13013	19988	19174	22435	26966	22325	22041	27457	22564	26774	28205
554	26713	unidentified compound			459023	255	26713	89:322.0 94:275.0 98:523.0 110:134.0 111:753.0 112:424.0 121:2.0 123:552.0 133:1756.0 135:105.0 136:4.0 137:628.0 138:483.0 139:224.0 140:165.0 144:1122.0 151:35.0 152:122.0 154:817.0 155:27.0 165:119.0 168:20.0 169:5.0 172:376.0 179:396.0 180:992.0 181:4421.0 182:1469.0 183:572.0 189:134.0 193:9.0 194:2.0 195:6.0 196:47.0 197:148.0 204:245.0 207:8.0 209:1.0 211:2558.0 212:292.0 213:179.0 214:67.…	940	1075	600	628	832	512	531	549	483	422	560	481	871	665	379	590	618	655	604	385	521	310	658	545	667	725	265	609	559	478	459	448	542	398	487	534	481	566	478	544	490
555	21513	unidentified compound			408963	258	21513	87:288.0 88:511.0 89:85.0 90:73.0 91:226.0 92:72.0 96:30.0 97:263.0 98:74.0 102:493.0 103:690.0 104:169.0 105:349.0 106:135.0 107:154.0 109:82.0 110:1295.0 111:61.0 114:232.0 115:748.0 116:318.0 117:999.0 118:126.0 119:115.0 120:85.0 121:161.0 122:49.0 125:58.0 130:262.0 131:1486.0 132:276.0 133:2612.0 134:934.0 135:657.0 136:337.0 137:342.0 138:285.0 139:103.0 140:84.0 142:57.0 143:33.0 144:133.…	2689	2747	185	1430	1995	1770	2892	3274	2656	2143	3745	2587	3102	4892	2553	4472	3999	2726	2974	5092	4073	4553	3915	3948	3519	4557	4997	4780	5723	4538	5335	4806	4558	3770	7237	6510	6576	5994	7202	6913	8248
556	21502	unidentified compound			983496	310	21502	88:87.0 89:83.0 90:74.0 97:93.0 98:85.0 99:58.0 101:142.0 102:48.0 103:493.0 104:85.0 105:99.0 106:65.0 110:41.0 111:65.0 113:97.0 116:74.0 117:279.0 120:470.0 121:92.0 125:22.0 129:48.0 132:22.0 133:315.0 134:75.0 140:9.0 141:21.0 143:41.0 144:53.0 145:26.0 147:1379.0 148:270.0 149:229.0 151:40.0 152:45.0 153:65.0 160:52.0 162:41.0 165:54.0 166:25.0 168:28.0 171:11.0 172:69.0 173:34.0 175:81.0 1…	625	10140	26919	808	1249	869	684	1459	1388	1204	2637	1911	943	644	8646	739	1360	1817	2261	1391	2559	2250	1685	1484	751	568	9251	1401	2344	2535	2296	2282	2118	2766	2030	1335	2035	629	10322	2008	4378
557	18488	unidentified compound			456907	232	18488	86:22.0 100:1553.0 101:64.0 102:107.0 114:209.0 115:180.0 116:59.0 117:118.0 129:57.0 131:327.0 132:50.0 133:290.0 143:35.0 144:89.0 147:2258.0 148:448.0 149:339.0 150:28.0 163:133.0 172:18.0 174:243.0 188:40.0 189:23.0 190:37.0 232:1491.0 233:316.0 234:93.0 247:19.0 306:56.0 334:36.0 335:34.0	65482	6222	11625	12156	7939	9123	14099	6940	5704	9885	10953	13361	11305	53048	20258	13688	8906	9892	10335	18489	11253	9990	18295	12321	29482	68316	14938	11955	16279	22345	19727	14277	8802	21262	21653	37837	15598	52869	20736	16903	18511
558	18345	unidentified compound			383811	215	18345	85:123.0 86:614.0 88:95.0 89:45.0 90:21.0 92:8.0 93:19.0 98:122.0 99:116.0 100:1953.0 101:310.0 102:109.0 103:61.0 105:36.0 107:61.0 110:46.0 112:14.0 113:147.0 114:34.0 115:68.0 116:60.0 117:66.0 118:33.0 119:16.0 123:5.0 127:148.0 130:129.0 131:39.0 132:46.0 133:594.0 134:276.0 136:8.0 140:4.0 141:147.0 142:48.0 143:168.0 144:19.0 146:89.0 147:589.0 148:94.0 150:17.0 152:14.0 154:9.0 155:19.0 1…	539	531	349	369	553	537	564	692	566	671	521	880	573	518	686	498	651	736	637	911	825	811	935	820	685	821	807	990	982	886	972	1084	972	854	1134	1184	998	981	1199	1091	1260
559	18318	unidentified compound			894472	204	18318	85 143.0 86 110.0 87 76.0 88 35.0 89 462.0 92 17.0 95 61.0 97 4.0 99 135.0 100 55.0 101 3107.0 102 256.0 103 16406.0 104 1615.0 105 573.0 113 66.0 115 543.0 116 1785.0 118 15.0 119 77.0 121 7.0 123 49.0 127 244.0 129 3356.0 130 372.0 131 897.0 132 118.0 133 1108.0 134 67.0 135 95.0 142 52.0 143 397.0 144 24.0 145 10.0 147 5838.0 148 809.0 149 768.0 150 32.0 151 2.0 153 12.0 155 1562.0 156 181.0 1…	3966	986	5125	2257	468	626	22549	7524	6576	3323	10936	1831	2038	4696	5160	5179	2021	11639	9985	4192	2038	2437	3923	2442	5115	5060	2524	850	2978	4814	3073	3514	3177	3133	3566	26253	9431	27448	18437	10882	8741
560	18305	unidentified compound			609795	217	18305	85:221.0 87:130.0 88:149.0 92:5.0 94:16.0 99:105.0 101:317.0 102:77.0 103:1722.0 104:170.0 109:27.0 111:165.0 113:144.0 115:79.0 116:34.0 117:989.0 118:23.0 119:94.0 120:6.0 121:12.0 123:13.0 124:24.0 125:71.0 127:111.0 129:1831.0 130:162.0 131:513.0 132:5.0 133:1419.0 134:77.0 135:94.0 140:5.0 141:512.0 142:57.0 143:682.0 144:2.0 145:65.0 147:5572.0 148:1008.0 149:651.0 150:83.0 151:68.0 153:17.…	2444	1330	4453	4127	4301	3442	23576	3745	3958	4233	4881	3493	4178	2423	10219	3094	3407	3749	4370	6670	3072	2736	5193	4327	4629	14177	8348	3791	4628	3788	4181	5080	5520	3826	5101	2060	4442	4435	9265	8152	4556
561	17947	unidentified compound			278710	177	17947	85 2119.0 87 471.0 88 900.0 94 1221.0 95 6.0 98 23.0 99 1143.0 100 386.0 101 1486.0 102 212.0 103 8179.0 104 551.0 105 450.0 109 377.0 113 99.0 115 3115.0 116 536.0 117 4141.0 118 423.0 119 24.0 120 7.0 130 3248.0 131 2430.0 132 319.0 133 4466.0 134 465.0 143 4873.0 144 476.0 147 57686.0 148 9003.0 149 4759.0 150 375.0 158 775.0 161 7.0 163 54.0 164 5.0 177 6803.0 178 972.0 179 414.0 184 151.0 18…	14517	13109	14041	8664	11346	9378	22901	14198	16965	11998	25289	14791	9384	15887	12820	7098	14331	25849	26945	38201	10030	9982	15250	15422	20713	13438	14578	7313	16484	39612	10824	13739	14786	16793	15884	16792	24262	15846	15895	14331	16406
562	17664	unidentified compound			227179	173	17664	85:240.0 86:247.0 88:292.0 90:108.0 91:68.0 92:65.0 93:256.0 94:24.0 96:1.0 97:109.0 98:110.0 99:222.0 100:6.0 107:655.0 108:5.0 110:421.0 111:48.0 113:553.0 114:55.0 116:283.0 117:3391.0 118:17.0 119:157.0 122:22.0 123:1.0 124:11.0 126:127.0 127:163.0 128:84.0 129:683.0 130:765.0 131:1193.0 132:706.0 135:9.0 136:217.0 140:70.0 145:243.0 146:58.0 150:21.0 153:2.0 161:21.0 173:3321.0 174:366.0 175…	14437	15414	21696	12498	24589	19758	21940	11890	21454	11829	37266	21756	28934	21800	29300	35701	27746	32001	21372	27730	26362	25375	31618	29411	43547	23051	25745	29207	27458	9720	21413	10473	6290	9476	21464	10201	7250	5712	5147	4978	7744
563	17537	unidentified compound			437253	258	17537	85:288.0 87:433.0 94:56.0 99:160.0 100:149.0 101:1035.0 102:286.0 103:961.0 106:2.0 110:128.0 111:94.0 112:100.0 113:480.0 114:88.0 115:2572.0 116:463.0 117:74.0 122:1.0 124:90.0 127:97.0 129:83.0 130:636.0 131:442.0 133:198.0 134:310.0 140:607.0 143:25.0 147:2232.0 148:395.0 156:83.0 157:95.0 172:109.0 177:21.0 184:12.0 185:10.0 186:13.0 189:213.0 195:1.0 203:22.0 205:104.0 209:6.0 214:557.0 215…	815	1177	359	733	615	651	854	892	745	1023	1088	853	747	1213	1232	1149	1352	981	1119	2609	1223	1311	1815	1592	1550	1582	2051	1104	2047	2701	2690	2040	1714	1949	2020	2606	2579	1875	3054	4680	4150
564	17267	unidentified compound			562200	243	17267	85:224.0 86:1265.0 87:466.0 89:2438.0 90:176.0 91:91.0 92:198.0 94:16.0 97:15.0 98:349.0 99:642.0 100:3096.0 101:3.0 102:166.0 111:9.0 112:512.0 113:286.0 114:91.0 119:365.0 125:23.0 126:396.0 127:430.0 128:1309.0 129:742.0 130:329.0 131:436.0 133:1409.0 134:198.0 135:175.0 139:190.0 140:195.0 142:2006.0 143:87.0 144:317.0 145:129.0 146:374.0 147:2210.0 148:248.0 149:557.0 153:10.0 154:104.0 155:…	3431	3113	3713	3633	4070	3594	4330	4596	4866	4220	5058	5811	5053	1845	2829	2263	3681	3625	4409	3022	3489	5367	4579	5082	4435	2690	3535	6381	7951	3384	6268	4211	4929	4228	6004	7468	6886	1729	3648	7201	5207
565	17233	unidentified compound			315594	170	17233	85:508.0 86:638.0 88:143.0 92:56.0 94:200.0 95:113.0 96:92.0 97:350.0 98:3230.0 99:3266.0 100:2039.0 101:334.0 102:238.0 103:127.0 104:34.0 106:161.0 107:493.0 110:854.0 111:22.0 113:3036.0 114:304.0 115:34.0 116:1389.0 118:34.0 124:436.0 126:1936.0 127:377.0 128:503.0 130:872.0 134:1119.0 136:2.0 138:25.0 139:115.0 140:160.0 141:183.0 142:699.0 143:120.0 144:307.0 154:13.0 155:1.0 156:1165.0 157…	1708	2449	1045	1569	1796	2038	1970	2019	1802	1988	2306	2205	2172	2057	2466	2567	2532	2237	2646	2578	2573	2195	2963	3214	2650	1827	3197	3515	3228	3877	3868	2820	3175	3459	3446	3109	4475	3538	3574	5883	4667
566	17174	unidentified compound			419707	242	17174	85:459.0 86:164.0 88:424.0 89:108.0 97:369.0 98:161.0 99:1193.0 100:716.0 101:220.0 102:350.0 103:166.0 107:846.0 109:86.0 111:72.0 112:44.0 113:331.0 114:179.0 115:446.0 116:119.0 118:103.0 120:24.0 127:322.0 128:253.0 129:262.0 130:1997.0 131:573.0 132:206.0 133:297.0 134:358.0 142:149.0 143:1075.0 144:343.0 146:155.0 147:3997.0 148:284.0 149:218.0 150:39.0 152:127.0 157:50.0 158:412.0 167:2.0 …	382	413	415	247	322	430	350	405	502	448	421	503	409	413	532	357	544	426	556	699	442	616	513	596	516	780	458	604	891	557	637	558	656	564	885	979	767	587	722	643	933
567	16820	unidentified compound			900045	204	16820	85 431.0 89 130.0 90 19.0 94 35.0 95 317.0 99 19.0 101 429.0 103 2036.0 105 161.0 109 200.0 111 155.0 113 108.0 114 12.0 116 254.0 117 205.0 118 18.0 119 25.0 120 35.0 121 20.0 123 76.0 128 65.0 129 2008.0 130 119.0 131 960.0 132 88.0 133 303.0 136 151.0 137 136.0 143 152.0 144 18.0 145 341.0 147 1562.0 153 6.0 156 42.0 157 70.0 161 139.0 163 169.0 167 119.0 168 13.0 169 306.0 171 213.0 172 107.0…	1795	743	4607	1427	1237	801	3683	1093	1763	1790	2496	1888	1133	2821	6192	1099	1146	3131	2534	2227	2020	1732	2384	1123	2812	3493	4624	1441	2816	2718	3475	2536	2590	2631	2720	7307	1261	4716	5183	2437	3206
568	16561	unidentified compound			245883	155	16561	88:9344.0 89:1820.0 90:325.0 91:1578.0 93:1.0 94:37.0 95:378.0 96:782.0 98:255.0 99:135.0 100:399.0 103:4405.0 104:228.0 105:5275.0 106:1100.0 107:327.0 110:4371.0 111:630.0 114:61.0 115:1240.0 117:1418.0 118:418.0 119:1281.0 120:75.0 121:463.0 124:62.0 127:343.0 130:2047.0 131:1273.0 132:189.0 133:4193.0 134:2628.0 135:786.0 137:520.0 138:431.0 141:220.0 142:72.0 143:86.0 145:193.0 146:189.0 148…	18547	26500	17364	16014	15227	17407	19269	16344	18682	16855	8426	17802	19307	8636	21511	2260	20373	19474	8462	20044	10631	5079	19717	11496	24847	32909	12996	24387	35802	21743	28310	24759	24243	22785	26766	32929	1954	27162	23649	4403	25591
569	16550	unidentified compound			186837	103	16550	85 6072.0 86 263.0 87 10773.0 88 2812.0 89 1831.0 90 358.0 91 171.0 95 146.0 98 124.0 99 3743.0 100 781.0 101 7697.0 102 3170.0 103 312425.0 104 25375.0 105 17741.0 106 1355.0 107 590.0 108 42.0 109 97.0 111 2.0 113 23.0 115 10250.0 116 1224.0 117 3148.0 118 346.0 119 611.0 123 143.0 125 175.0 126 272.0 127 21.0 129 791.0 130 1652.0 131 2946.0 132 195.0 133 5064.0 134 874.0 135 148.0 136 2232.0 1…	na	na	na	na	na	na	na	na	na	na	na	na	na	na	na	na	na	na	na	na	na	na	na	na	na	na	na	na	na	na	na	na	na	na	na	na	na	na	na	na	na
570	14721	unidentified compound			849904	204	14721	86:13.0 87:16.0 88:4.0 89:65.0 90:8.0 92:3.0 97:2.0 98:6.0 99:25.0 100:27.0 101:49.0 103:343.0 104:26.0 106:2.0 107:25.0 108:5.0 109:2.0 110:14.0 113:14.0 114:14.0 115:4.0 116:52.0 117:204.0 118:6.0 119:21.0 120:3.0 122:4.0 125:9.0 127:2.0 128:2.0 129:442.0 130:46.0 131:61.0 132:21.0 133:108.0 135:4.0 139:12.0 141:1.0 142:3.0 143:72.0 144:93.0 145:35.0 146:5.0 147:859.0 148:97.0 149:109.0 150:22.…	4073	1862	3440	1778	1575	2297	5938	1878	2093	2021	3042	2604	2041	3842	2224	1819	2269	1951	2963	4369	2533	2334	4402	3108	4179	4474	3108	1886	3494	5554	3531	3554	3166	2067	2763	6664	2628	3861	3838	3383	3379
571	14697	unidentified compound			939075	204	14697	85 34.0 86 3.0 87 27.0 88 17.0 89 344.0 90 37.0 91 9.0 92 6.0 95 11.0 98 3.0 99 21.0 101 84.0 103 826.0 104 38.0 105 17.0 106 12.0 107 7.0 108 6.0 109 6.0 113 35.0 115 33.0 116 80.0 117 233.0 118 22.0 119 14.0 120 3.0 123 3.0 126 1.0 127 76.0 129 888.0 130 129.0 131 183.0 132 7.0 133 535.0 134 71.0 135 6.0 138 5.0 139 1.0 141 11.0 142 6.0 143 160.0 144 14.0 145 37.0 146 43.0 147 1131.0 148 151.0 …	4913	908	19996	1387	3313	2032	2494	9190	7742	1505	2718	580	1909	5139	16050	689	5487	12937	11237	1998	1228	6516	12941	1817	2557	5430	1043	1547	1959	4062	1429	1782	1606	8857	13018	28205	3406	5785	14678	14718	13609
572	14694	unidentified compound			796202	204	14694	85 31.0 86 21.0 87 55.0 89 125.0 90 3.0 91 6.0 94 3.0 95 6.0 99 29.0 101 227.0 102 46.0 103 1397.0 104 104.0 105 19.0 108 4.0 109 7.0 110 17.0 111 17.0 112 1.0 113 38.0 114 3.0 115 92.0 116 68.0 117 1733.0 118 140.0 119 130.0 120 5.0 121 1.0 122 5.0 123 6.0 128 6.0 129 495.0 130 67.0 131 141.0 132 20.0 133 273.0 134 38.0 135 30.0 136 6.0 137 3.0 138 1.0 139 5.0 140 5.0 141 2.0 142 6.0 143 264.0 1…	42715	7365	27574	21007	18868	16893	66820	21000	20220	26678	30173	15984	18317	49397	32043	17194	16649	32181	31578	33539	17394	16474	36718	21133	43790	57276	24233	15812	29046	40767	27762	28577	27488	21708	38193	76581	23735	68110	27628	33760	23873
573	13107	unidentified compound			545737	243	13107	85:147.0 86:70.0 87:581.0 88:69.0 89:2662.0 90:398.0 92:1.0 93:1.0 94:131.0 95:6.0 97:18.0 98:529.0 100:2155.0 101:1030.0 102:616.0 103:23147.0 104:1997.0 105:1443.0 107:9.0 109:4.0 110:470.0 111:373.0 112:995.0 113:756.0 114:881.0 115:915.0 116:53.0 117:2332.0 118:157.0 119:430.0 120:217.0 121:3.0 122:2.0 124:191.0 126:1556.0 127:425.0 128:628.0 129:2057.0 130:2103.0 131:2082.0 132:328.0 133:585…	1598	1226	705	888	1297	824	1254	1659	1157	1152	1483	1429	1659	1881	1146	1627	1435	1491	1274	1897	1521	2127	1505	1937	1374	2382	1689	2032	2641	2606	2135	2754	2669	1684	2246	3190	2297	1852	1797	3219	3261
574	12012	unidentified compound			603357	204	12012	85 79.0 89 114.0 90 1.0 100 56.0 101 421.0 103 1308.0 105 2.0 108 1.0 109 146.0 111 1.0 113 77.0 114 36.0 115 14.0 116 31.0 117 917.0 118 40.0 119 17.0 121 35.0 129 1354.0 131 212.0 133 100.0 134 10.0 142 24.0 143 293.0 147 2148.0 148 223.0 149 200.0 151 166.0 153 685.0 155 425.0 157 118.0 158 29.0 161 18.0 163 29.0 169 50.0 170 23.0 171 103.0 172 16.0 174 42.0 177 77.0 179 255.0 180 16.0 183 60.…	4059	1112	1132	1969	2001	1766	13031	1937	2167	2530	2737	3019	3081	4297	3430	1835	2114	2350	2819	2931	1724	2042	3450	2093	7349	4215	2569	2486	2437	2930	2119	2495	2032	1632	3293	6116	2352	4718	3108	3373	1649
575	11731	unidentified compound			807716	204	11731	91:43.0 101:15.0 102:69.0 103:354.0 105:1703.0 106:138.0 115:152.0 117:163.0 127:110.0 128:142.0 129:811.0 130:99.0 131:70.0 141:12.0 142:55.0 143:68.0 144:44.0 147:479.0 155:138.0 156:49.0 157:76.0 158:29.0 160:15.0 169:111.0 174:74.0 187:30.0 189:112.0 191:60.0 200:181.0 203:2.0 204:2096.0 205:423.0 206:218.0 216:16.0 217:619.0 218:78.0 219:47.0 229:1.0 231:1.0 244:21.0 271:12.0 299:16.0 304:39…	9229	914	11402	2172	1621	2107	27177	11764	1751	3077	5839	3553	9703	8432	10531	9478	986	6785	8088	7410	6602	1522	7023	4385	9011	12482	8008	1400	6699	11367	2871	3241	16463	12285	7644	16005	7494	15135	9117	7580	2787
576	11353	unidentified compound			911271	259	11353	85:106.0 86:3.0 89:161.0 97:44.0 98:45.0 99:12.0 100:29.0 101:111.0 103:966.0 106:36.0 116:231.0 117:438.0 121:1.0 128:48.0 129:523.0 130:140.0 131:15.0 132:34.0 133:25.0 143:46.0 144:98.0 145:12.0 147:813.0 148:305.0 154:9.0 157:165.0 158:23.0 160:552.0 161:230.0 162:47.0 163:160.0 165:25.0 168:62.0 169:66.0 171:6.0 174:100.0 177:2.0 178:1.0 180:21.0 183:30.0 186:43.0 187:1.0 188:12.0 189:97.0 1…	594	293	947	378	209	337	951	509	441	589	234	379	527	682	518	426	375	657	714	775	448	402	621	492	565	667	355	431	655	887	527	399	579	428	577	1114	471	655	845	730	568
577	8841	unidentified compound			807110	290	8841	86:79.0 100:23.0 103:852.0 116:44.0 117:57.0 144:303.0 145:25.0 160:26.0 172:4.0 174:39.0 211:6.0 214:38.0 232:288.0 233:78.0 262:289.0 263:75.0 264:27.0 276:11.0 290:1317.0 291:258.0 292:26.0 304:29.0 308:24.0 342:21.0 466:4.0	1793	2214	312	1829	2878	3019	4136	3385	3973	3619	4886	4566	5567	5034	4755	4735	4780	5989	6810	6474	4337	5232	6419	6178	6960	6485	6038	6768	6788	6885	6458	6046	6960	6725	6844	8588	7464	6753	6171	7428	6870
578	8270	unidentified compound			811465	246	8270	85:109.0 86:278.0 88:75.0 89:1388.0 90:138.0 93:50.0 99:89.0 100:416.0 101:442.0 102:279.0 103:5330.0 104:417.0 105:254.0 107:22.0 112:16.0 113:145.0 114:1163.0 115:85.0 116:384.0 117:2621.0 118:415.0 119:44.0 122:45.0 124:10.0 128:821.0 129:1089.0 130:505.0 131:472.0 133:771.0 134:291.0 140:91.0 141:19.0 142:371.0 143:193.0 144:1336.0 145:27.0 146:122.0 147:6477.0 148:846.0 149:483.0 150:20.0 15…	617	2989	9524	735	719	688	1899	713	574	898	1472	1120	1563	622	3899	980	947	789	1505	1320	1570	1262	1781	1131	1259	453	3854	1958	1400	1751	2139	2640	969	2067	2226	2448	1898	627	4054	2657	2677
579	8240	unidentified compound			623699	353	8240	85:728.0 86:748.0 87:88.0 88:48.0 89:449.0 90:237.0 91:1092.0 92:17.0 93:54.0 94:40.0 95:708.0 96:1054.0 97:566.0 98:321.0 99:3391.0 100:1990.0 101:557.0 102:321.0 103:1448.0 104:616.0 107:44.0 110:888.0 111:86.0 112:104.0 113:905.0 114:1471.0 115:402.0 116:271.0 117:706.0 118:395.0 119:651.0 120:165.0 121:271.0 122:130.0 123:72.0 124:150.0 125:106.0 127:144.0 128:129.0 129:1182.0 130:634.0 131:2…	5190	6729	22375	1354	2129	2731	1300	1576	773	2168	3110	1927	1604	8788	9477	1927	820	2536	2948	4624	1646	2197	1729	1802	1220	6437	6282	1008	694	2355	1360	2252	1871	1213	3179	1304	2744	6957	1910	1646	2239
580	7826	unidentified compound			790112	204	7826	86:153.0 99:14.0 100:39.0 101:193.0 102:60.0 103:526.0 104:87.0 113:66.0 116:40.0 128:339.0 129:472.0 130:239.0 131:218.0 133:37.0 136:14.0 142:66.0 144:394.0 147:2028.0 148:15.0 152:31.0 154:8.0 155:3.0 156:7.0 157:134.0 158:13.0 159:39.0 160:193.0 168:55.0 169:215.0 170:22.0 172:8.0 174:178.0 175:14.0 176:16.0 177:41.0 184:3.0 189:284.0 190:17.0 191:310.0 192:87.0 194:19.0 197:6.0 203:28.0 204:…	38382	9414	33126	10615	11129	11423	34157	16699	14107	19584	23282	13039	14435	43015	28751	13170	9797	26272	21326	26427	13645	15352	27799	14932	22640	47830	21010	11697	21777	31453	20999	24671	25888	18719	21016	51297	13721	55792	27218	23366	21934
581	7718	unidentified compound			553406	99	7718	85:1667.0 86:458.0 87:63.0 88:139.0 95:187.0 96:242.0 97:859.0 98:425.0 99:5474.0 100:292.0 101:326.0 102:124.0 109:220.0 110:112.0 111:349.0 113:1308.0 114:55.0 117:236.0 119:6.0 125:149.0 126:832.0 127:675.0 128:177.0 130:621.0 142:29.0 143:7.0 144:600.0 145:60.0 146:6.0 153:38.0 154:295.0 155:111.0 156:377.0 157:88.0 158:633.0 159:9.0 160:120.0 161:23.0 163:1.0 169:35.0 170:115.0 171:149.0 172…	15938	4871	2415	9142	12047	11501	30915	18748	13210	13750	25892	19235	14598	13217	2912	17101	11264	19447	19970	17353	11476	24826	21921	19820	18076	14479	3316	17252	20368	20756	16465	20012	15710	13343	17427	24595	15501	12036	5180	35125	27942
582	7458	unidentified compound			395250	160	7458	85:293.0 86:845.0 87:1678.0 88:482.0 89:76.0 90:29.0 92:97.0 94:21.0 96:113.0 99:321.0 101:523.0 102:1026.0 103:1203.0 104:49.0 105:417.0 108:126.0 110:107.0 113:36.0 115:522.0 116:575.0 117:2145.0 118:720.0 119:1055.0 120:129.0 121:91.0 124:6.0 129:66.0 130:178.0 131:3263.0 132:2210.0 133:2244.0 134:466.0 135:222.0 138:75.0 142:20.0 143:7.0 144:152.0 145:82.0 146:1527.0 147:12354.0 148:2010.0 14…	4768	3790	3794	9994	9525	7625	9858	11973	14478	15388	14340	14531	11093	12298	12436	8169	13743	16179	15227	13732	7766	5338	10890	8655	13157	6704	12746	14540	8865	11340	10128	8741	10893	11596	17038	21883	13888	14436	12454	13499	14428
583	7409	unidentified compound			540397	180	7409	100:51.0 101:68.0 103:20.0 120:28.0 126:123.0 127:98.0 130:21.0 140:25.0 152:43.0 180:2126.0 181:144.0 184:4.0 197:373.0 198:19.0 217:133.0 218:5.0 228:10.0 271:5.0 277:4.0 280:3.0 307:7.0 313:8.0 316:24.0 336:7.0 381:4.0 394:12.0 418:2.0 438:9.0 439:7.0 442:8.0 444:9.0 469:7.0 496:20.0 499:11.0	2015	3776	3610	4649	7055	8697	3289	4973	4649	8991	5802	7153	4774	4630	5592	6081	5940	4923	6050	5601	4394	3799	5221	6443	3278	1523	4663	3981	4792	6509	4162	5395	4017	5525	5375	4360	8297	2999	5933	6697	7187
584	7102	unidentified compound			460350	171	7102	85:530.0 86:1604.0 87:331.0 88:437.0 89:1339.0 90:88.0 91:48.0 92:12.0 94:53.0 96:57.0 97:231.0 98:180.0 99:130.0 100:3928.0 101:1450.0 102:2166.0 103:380.0 104:128.0 110:80.0 112:1.0 113:68.0 114:196.0 115:241.0 116:1623.0 117:304.0 118:74.0 122:3.0 124:167.0 125:13.0 127:28.0 128:676.0 129:1162.0 130:1352.0 131:274.0 132:111.0 133:274.0 139:10.0 140:244.0 141:449.0 142:123.0 143:2743.0 144:1290…	1094	1167	471	733	581	787	765	1044	824	663	560	844	1032	1292	1416	645	646	1387	1184	865	566	1182	583	951	747	1758	1473	569	1454	663	1344	1192	1148	985	1285	1889	972	1305	1050	1143	1484
585	6864	unidentified compound			633264	299	6864	85:400.0 86:65.0 88:112.0 89:175.0 90:108.0 92:7.0 93:7.0 95:80.0 99:423.0 100:243.0 101:991.0 102:228.0 103:1057.0 104:265.0 109:52.0 110:31.0 111:218.0 113:187.0 114:75.0 115:287.0 116:306.0 117:379.0 119:61.0 120:53.0 126:28.0 127:197.0 128:51.0 129:710.0 130:65.0 132:164.0 133:165.0 134:58.0 135:99.0 139:8.0 140:10.0 141:190.0 142:48.0 143:222.0 144:80.0 146:41.0 147:1139.0 148:489.0 150:113.…	2533	2526	245	1426	1988	2179	1976	3374	2603	2827	4104	3398	2821	4613	2973	3691	3125	4015	3796	4440	2809	4302	4400	3629	3224	4725	5096	3339	4728	5165	4034	5746	4866	3631	5736	6034	5699	4861	6492	5115	6072
586	6802	unidentified compound			503643	99	6802	85:60.0 86:424.0 87:94.0 89:83.0 91:1336.0 92:129.0 93:43.0 97:20.0 98:170.0 99:28828.0 100:2079.0 101:214.0 102:351.0 103:2616.0 104:252.0 105:1.0 107:28.0 112:69.0 114:71.0 115:10.0 116:315.0 118:291.0 119:212.0 120:3747.0 121:229.0 128:19.0 130:1086.0 131:134.0 132:47.0 143:88.0 144:106.0 145:155.0 146:1457.0 147:258.0 152:115.0 155:299.0 156:187.0 158:60.0 160:29.0 168:2.0 171:81.0 173:255.0 …	5857	5309	4532	3612	6352	6656	7416	8622	6433	7865	10768	7874	6540	8715	8847	8081	7543	10835	10886	14248	7746	6903	11168	11998	7468	8437	13084	10329	6847	13595	10621	11784	11682	10374	14499	18866	13693	16876	16456	13089	20078
587	6646	unidentified compound			584590	205	6646	85:237.0 86:18.0 89:620.0 90:132.0 92:138.0 93:371.0 94:23.0 95:86.0 97:26.0 99:10.0 100:277.0 101:143.0 102:54.0 103:454.0 104:12.0 105:26.0 106:26.0 107:127.0 110:127.0 111:57.0 112:23.0 113:38.0 114:215.0 115:494.0 116:29.0 117:2092.0 118:131.0 119:26.0 120:197.0 125:6.0 126:171.0 127:211.0 129:376.0 130:329.0 131:198.0 132:29.0 133:499.0 134:185.0 136:9.0 139:24.0 140:21.0 142:87.0 143:115.0 …	5796	4442	1255	2933	3553	3226	11884	3490	3727	4047	4595	4447	4095	3984	3118	3729	3587	3913	4434	5062	3280	4026	4614	4098	7272	4105	3828	4480	3729	5514	3474	4471	4422	3668	4298	8524	4664	3321	4773	5110	4020
588	6580	unidentified compound			732418	391	6580	85:151.0 86:78.0 87:160.0 88:83.0 89:71.0 92:22.0 95:15.0 97:91.0 98:35.0 99:222.0 100:479.0 101:128.0 102:336.0 103:423.0 104:12.0 105:60.0 107:30.0 108:12.0 109:215.0 110:28.0 111:160.0 112:8.0 114:32.0 115:250.0 116:85.0 117:573.0 118:57.0 119:262.0 123:21.0 124:26.0 125:22.0 126:27.0 127:145.0 128:20.0 129:6.0 130:30.0 131:843.0 132:209.0 133:2418.0 134:411.0 135:230.0 136:1.0 139:182.0 140:5…	858	1376	264	979	1612	2021	2203	1950	1377	1634	2219	1889	1942	2107	1807	2003	1846	1963	2286	3602	1914	2357	3818	2786	2077	3133	2899	2485	2813	3369	3040	3482	3104	2503	3501	4890	3122	3466	3341	3435	3614
589	6579	unidentified compound			534128	269	6579	93:6.0 97:55.0 98:18.0 99:11.0 105:354.0 108:42.0 109:22.0 110:48.0 112:14.0 115:2.0 124:49.0 127:46.0 130:14.0 131:30.0 134:21.0 140:27.0 150:7.0 151:25.0 153:67.0 166:18.0 167:177.0 168:7.0 169:30.0 170:29.0 182:83.0 184:43.0 195:134.0 196:12.0 197:9.0 198:7.0 213:18.0 221:19.0 223:30.0 224:20.0 225:525.0 226:60.0 227:57.0 228:31.0 239:49.0 240:46.0 241:37.0 243:6.0 253:14.0 254:32.0 255:36.0 2…	1458	1406	263	787	1211	1290	1258	978	1101	1562	1670	1980	1460	1951	1575	1540	1599	1795	1961	2495	1527	2072	2378	2182	1261	2677	2271	1607	2349	2492	2396	2692	2386	2109	2056	2882	2636	2970	2891	2864	3633
[truncated: 76 more rows]
[truncated: 4,993 more columns]
